# Supplementary material for: Molecular hybrid design, synthesis and biological evaluation of N-phenyl sulfonamide linked N-acyl hydrazone derivatives functioning as COX-2 inhibitors: new anti-inflammatory, anti-oxidant and anti-bacterial agents
Source: Royal Society of Chemistry journal article supplement (doi:10.1039/c7nj03332j), 2017-01-01
Supplement: c7nj03332j1.pdf [file c7nj03332j1.pdf]

### Supporting Information

#### **Molecular hybrid design, synthesis and biological evaluation of N-phenyl sulfonamide linked N-acyl hydrazone derivatives functioning as COX-2 inhibitors: New anti-inflammatory, anti-oxidant and anti-bacterial agents**

Vasubabu Gorantla<sup>a,b</sup>, Rambabu Gundla<sup>c\*</sup>, Surender Singh Jadav<sup>c</sup>, Sreenivasa Reddy Anugu<sup>b</sup>,  
Jithendra Chimakurthy<sup>d</sup>, Kameswara Rao NS<sup>b</sup>, Raghubabu Korupolu<sup>a\*</sup>

<sup>a</sup>Department of Engineering Chemistry, Andhra University College of Engineering (A),  
Vishakhapatnam, India, 530003

<sup>b</sup>GVK Biosciences Private Limited, Medicinal Chemistry Laboratory, Hyderabad, India, 500076

<sup>c</sup>Department of Chemistry, School of Technology, GITAM University, Hyderabad (T.S), India,  
502 102

<sup>d</sup>Department of Pharmacology, Bapatla College of Pharmacy, Bapatla Guntur (Dist.), Andhra  
Pradesh, Bapatla, India, 522 101

## **Table of contents**

|                                                                                  |                  |
|----------------------------------------------------------------------------------|------------------|
| <b>1. <math>^1\text{H}</math> NMR, <math>^{13}\text{C}</math> NMR, HRMS, DSC</b> | <b>page 3-95</b> |
|----------------------------------------------------------------------------------|------------------|

GVB-SK-INT-1

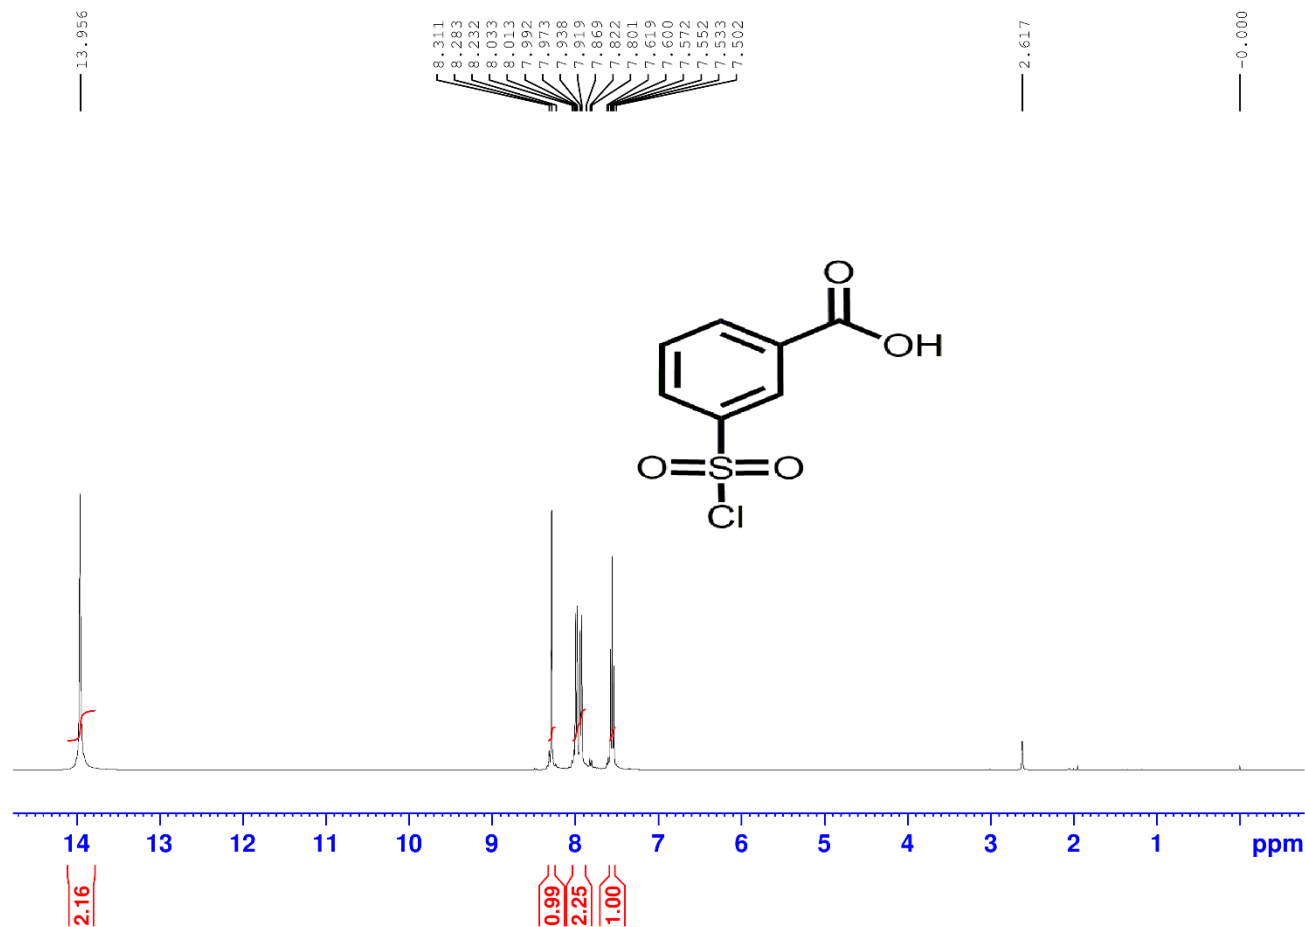

Current Data Parameters  
 NAME 511701C5156  
 EXPNO 1  
 PROCNO 1

F2 - Acquisition Parameters  
 Date\_ 20170131  
 Time 3.57  
 INSTRUM spect  
 PROBHD 5 mm PABBO BB/  
 PULPROG zg30  
 TD 65536  
 SOLVENT DMSO  
 NS 16  
 DS 2  
 SWH 8012.820 Hz  
 FIDRES 0.122266 Hz  
 AQ 4.0894465 sec  
 RG 45.52  
 DW 62.400 usec  
 DE 6.50 usec  
 TE 298.7 K  
 D1 1.00000000 sec  
 TD0 1

===== CHANNEL f1 =====  
 SF01 400.1324710 MHz  
 NUC1 1H  
 P1 9.75 usec  
 PLW1 16.00000000 W

F2 - Processing parameters  
 SI 65536  
 SF 400.1299566 MHz  
 WDW EM  
 SSB 0  
 LB 0.30 Hz  
 GB 0  
 PC 1.00

ANL-MCL5-NMR-001

<sup>1</sup>H NMR of Compound-B

GVB-SK-INT-1

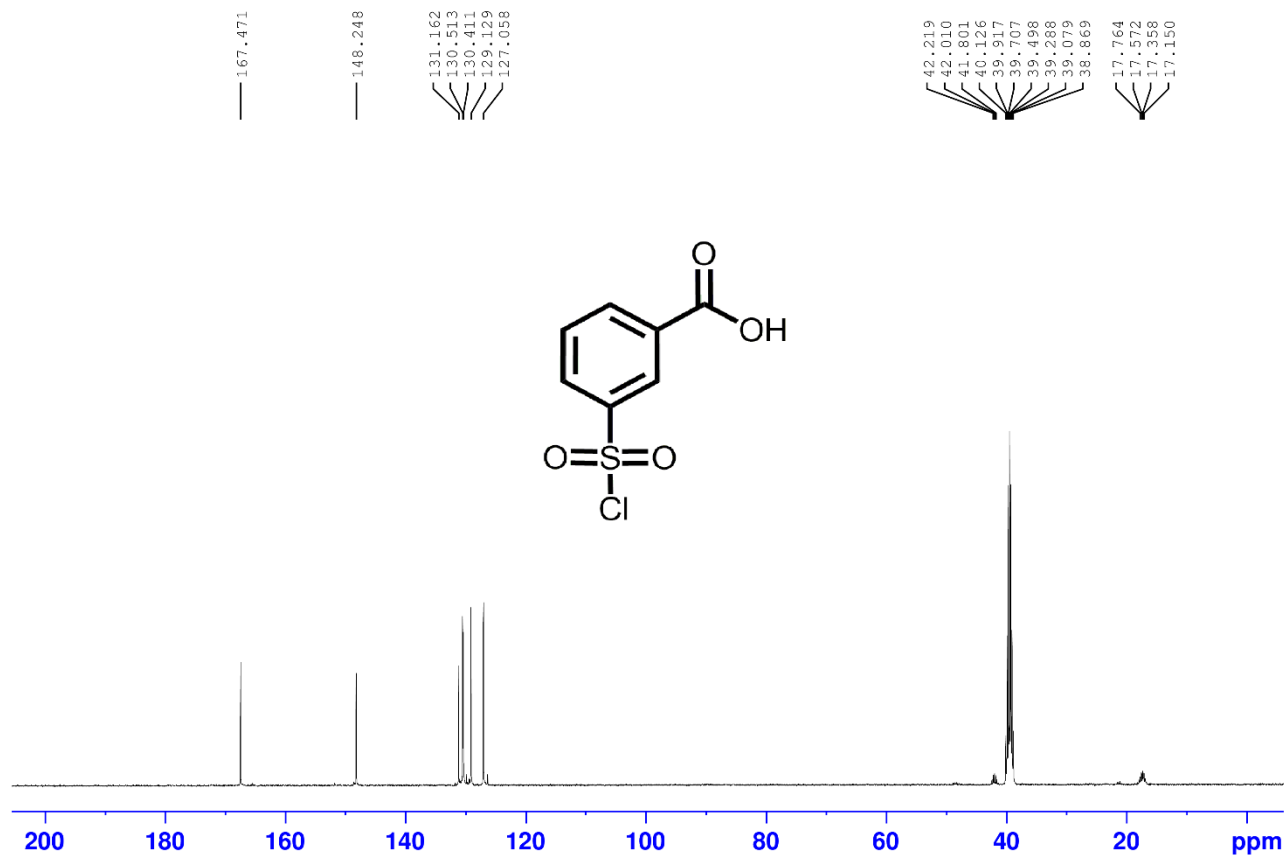

Current Data Parameters  
NAME 511701C5156  
EXPNO 2  
PROCNO 1

F2 - Acquisition Parameters  
Date\_ 20170131  
Time 5.14  
INSTRUM spect  
PROBHD 5 mm PABBO BB/  
PULPROG zgpg30  
TD 65536  
SOLVENT DMSO  
NS 1024  
DS 4  
SWH 24038.461 Hz  
FIDRES 0.366798 Hz  
AQ 1.3631488 sec  
RG 195.29  
DW 20.800 usec  
DE 6.50 usec  
TE 298.9 K  
D1 3.00000000 sec  
D11 0.03000000 sec  
TD0 1

===== CHANNEL f1 =====  
SFO1 100.6228293 MHz  
NUC1 13C  
P1 10.00 usec  
PLW1 78.00000000 W

===== CHANNEL f2 =====  
SFO2 400.1316005 MHz  
NUC2 1H  
CPDPRG12 waltz16  
PCPD2 90.00 usec  
PLW2 16.00000000 W  
PLW12 0.18777999 W  
PLW13 0.15210000 W

F2 - Processing parameters  
SI 32768  
SF 100.6127420 MHz  
WDW EM  
SSB 0  
LB 2.00 Hz  
GB 0  
PC 1.40

<sup>13</sup>CNMR of Compound-Bin DMSO-d<sub>6</sub>





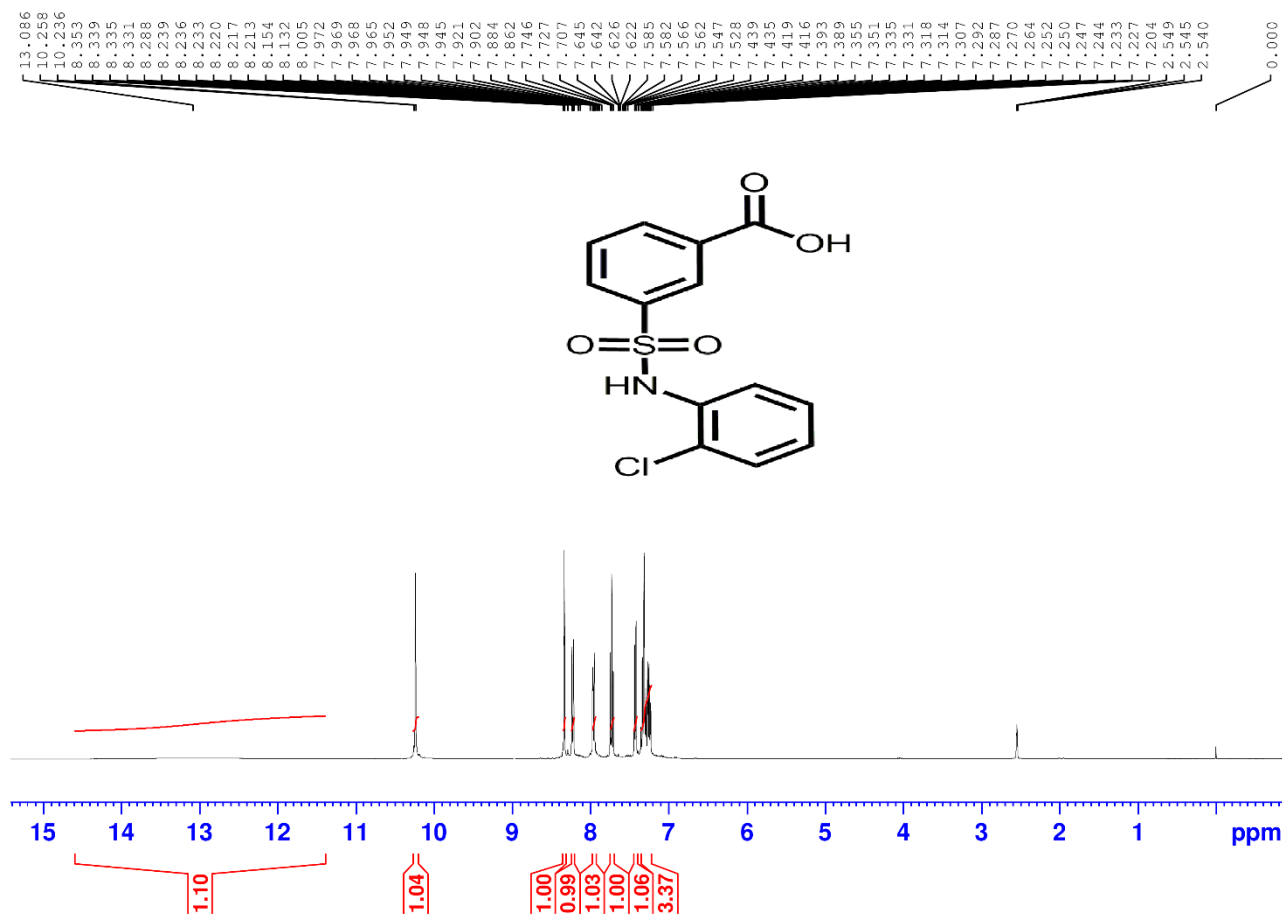

Current Data Parameters  
NAME 511701C5157  
EXPNO 1  
PROCNO 1

F2 - Acquisition Parameters  
Date\_ 20170131  
Time 2.36  
INSTRUM spect  
PROBHD 5 mm PABBO BB/  
PULPROG zg30  
TD 65536  
SOLVENT DMSO  
NS 16  
DS 2  
SWH 8012.820 Hz  
FIDRES 0.122266 Hz  
AQ 4.0894465 sec  
RG 34.67  
DW 62.400 usec  
DE 6.50 usec  
TE 298.8 K  
D1 1.00000000 sec  
TD0 1

===== CHANNEL f1 =====  
SFO1 400.1324710 MHz  
NUC1 1H  
P1 9.75 usec  
PLW1 16.00000000 W

F2 - Processing parameters  
SI 65536  
SF 400.1299853 MHz  
WDW EM  
SSB 0  
LB 0.30 Hz  
GB 0  
PC 1.00

ANL-MCL5-NMR-001

<sup>1</sup>H NMR of Compound-C

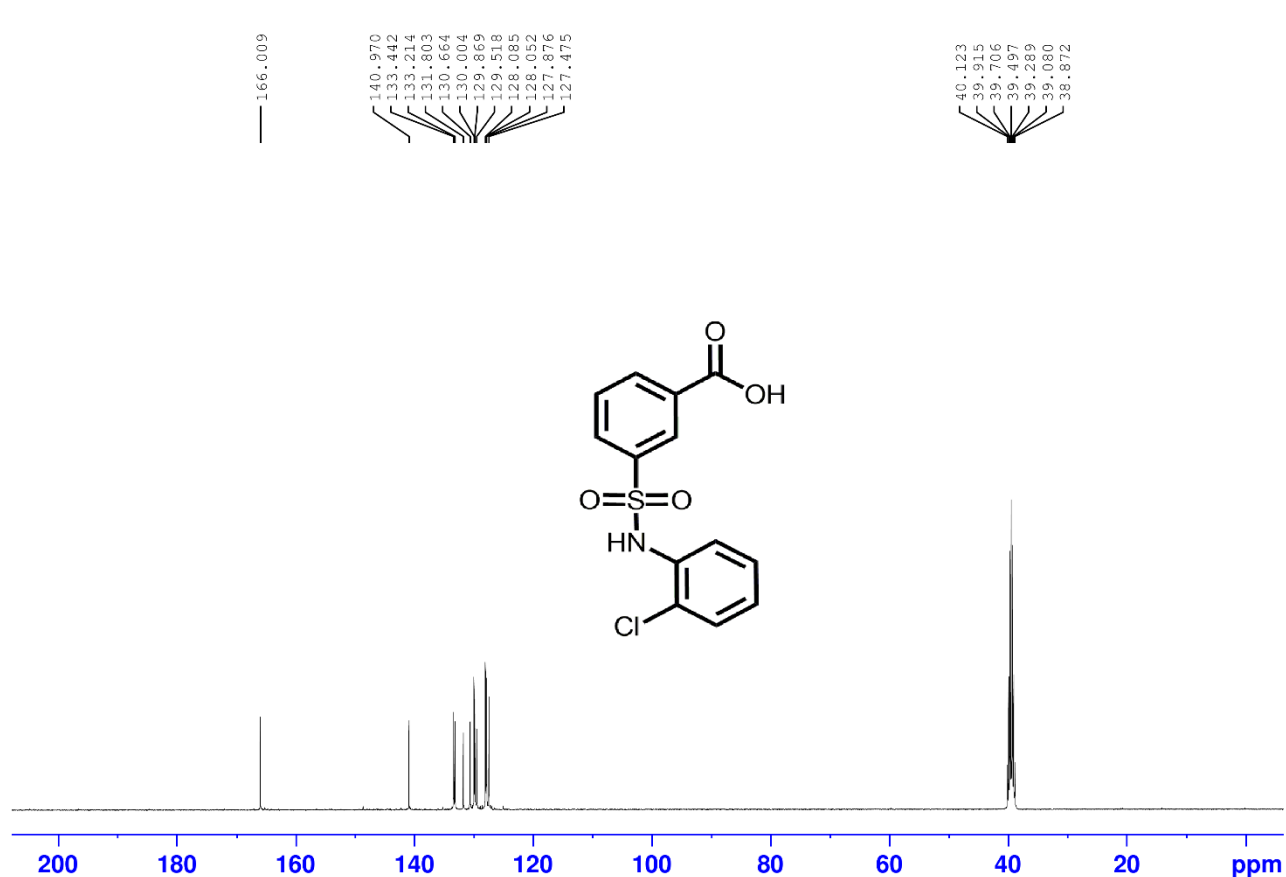

Current Data Parameters

NAMF 511701C5157

EXPNO 2

PROCNO 1

F2 - Acquisition Parameters

Date\_ 20170131

Time 3.53

INSTRUM spect

PROBHD 5 mm PABBO BB/

PULPROG zgpg30

ID 65536

SOLVENT DMSO

NS 1024

DS 4

SWH 24038.461 Hz

FIDRES 0.366798 Hz

AQ 1.3631488 sec

RG 195.29

DW 20.800 usec

DE 6.50 usec

TE 299.1 K

D1 3.0000000 sec

D11 0.0300000 sec

TD0 1

===== CHANNEL f1 =====

SFO1 100.6228293 MHz

NUC1 13C

P1 10.00 usec

PLW1 78.0000000 W

===== CHANNEL f2 =====

SFO2 400.1316005 MHz

NUC2 1H

CPDPRG2 waltz16

PCPD2 90.00 usec

PLW2 16.0000000 W

PLW12 0.18777999 W

PLW13 0.15210000 W

F2 - Processing parameters

SI 32768

SF 100.6128108 MHz

WDW EM

SSB 0

LB 2.00 Hz

GB 0

PC 1.40

ANL-MCL5-NMR-001

<sup>13</sup>CNMR of Compound-C in DMSO-d<sub>6</sub>

## Elemental Composition Report

Page 1

### Single Mass Analysis

Tolerance = 1000.0 PPM / DBE: min = -1.5, max = 50.0

Selected filters: None

Monoisotopic Mass, Even Electron Ions

38 formula(e) evaluated with 1 results within limits (up to 1 best isotopic matches for each mass)

Elements Used:

C: 0-13 H: 0-11 N: 0-1 O: 0-4 S: 0-1 Cl: 0-1

GVB-SK-INT-2

511701C5159 8 (0.127) AM (Top,4, Ar,5000.0,195.32,1.00,LS 5); Sm (Mn, 2x1.00); Sb (1,40.00 ); Cm (6:14)

1: TOF MS ES+  
129

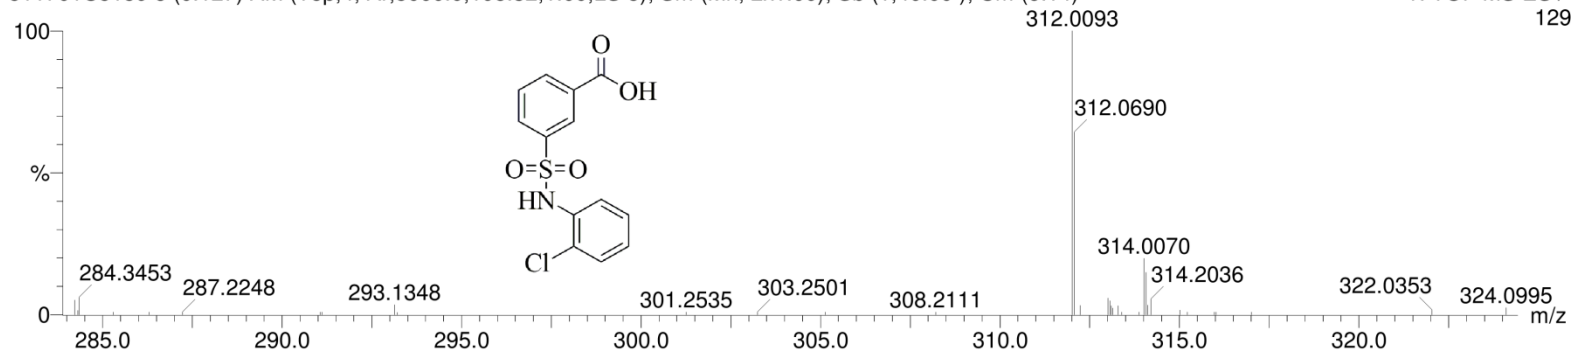

Minimum: -1.5  
Maximum: 5.0 1000.0 50.0

| Mass     | Calc. Mass | mDa  | PPM  | DBE | i-FIT | Formula           |
|----------|------------|------|------|-----|-------|-------------------|
| 312.0093 | 312.0097   | -0.4 | -1.3 | 8.5 | 10.7  | C13 H11 N O4 S Cl |

HRMS of Compound-C



GVB-SKHATU-01

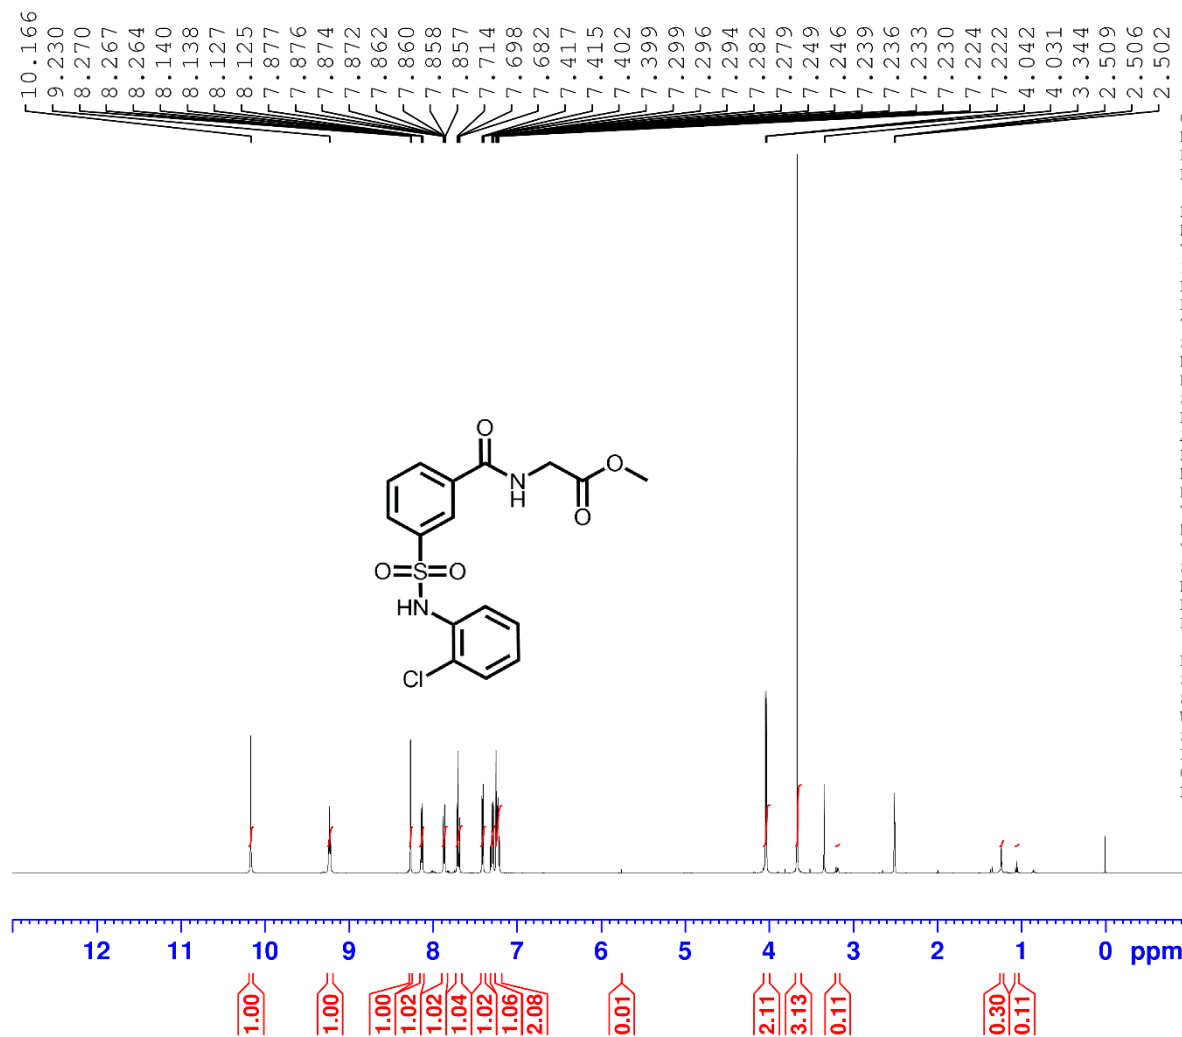

Current Data Parameters  
 NAME 511701C3027  
 EXPNO 1  
 PROCNO 1

F2 - Acquisition Parameters  
 Date\_ 20170127  
 Time 0.05 h  
 INSTRUM spect  
 PROBHD Z119470\_0231 (  
 PULPROG zg30  
 TD 65536  
 SOLVENT DMSO  
 NS 8  
 DS 0  
 SWH 10000.000 Hz  
 FIDRES 0.305176 Hz  
 AQ 3.2767999 sec  
 RG 79.68  
 DW 50.000 usec  
 DE 6.50 usec  
 TE 298.1 K  
 D1 1.00000000 sec  
 TD0 1  
 SF01 500.1330885 MHz  
 NUC1 1H  
 P1 8.75 usec  
 PLW1 23.00000000 W

F2 - Processing parameters  
 SI 65536  
 SF 500.1300013 MHz  
 WDW EM  
 SSB 0  
 LB 0.30 Hz  
 GB 0  
 PC 1.00

<sup>1</sup>H NMR of Compound-D

GVB-SKHATU-01

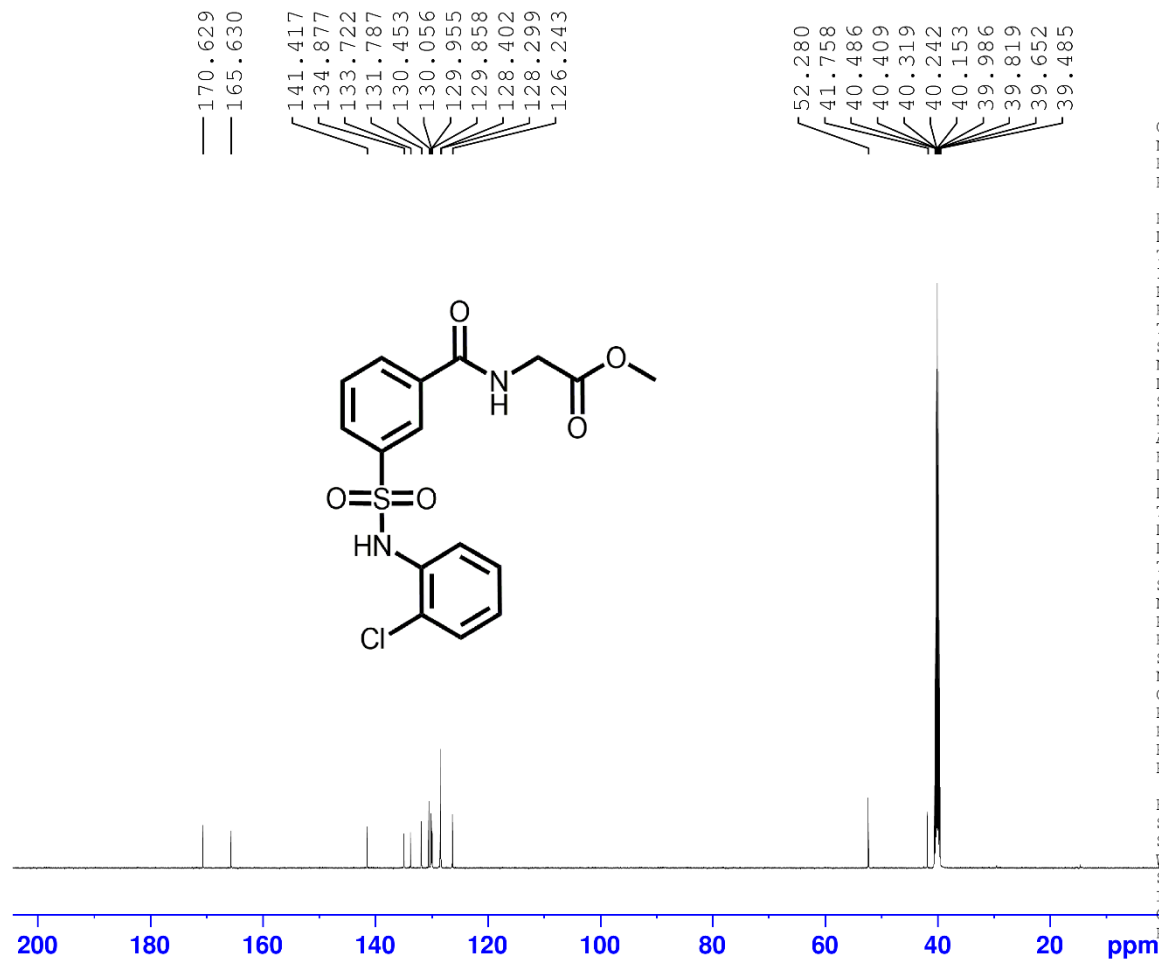

Current Data Parameters  
NAME 511701C3027  
EXPNO 2  
PROCNO 1

F2 - Acquisition Parameters  
Date\_ 20170127  
Time\_ 1.17 h  
INSTRUM spect  
PROBHD Z119470\_0231 (   
PULPROG zgpg30  
TD 65536  
SOLVENT DMSO  
NS 1024  
DS 4  
SWH 29761.904 Hz  
FIDRES 0.908261 Hz  
AQ 1.1010048 sec  
RG 197.72  
DW 16.800 usec  
DE 6.50 usec  
TE 298.1 K  
D1 3.00000000 sec  
D11 0.03000000 sec  
TD0 1  
SFO1 125.7703643 MHz  
NUC1 13C  
P1 9.50 usec  
PLW1 88.00000000 W  
SFO2 500.1320005 MHz  
NUC2 1H  
CPDPRG[2] waltz16  
PCPD2 80.00 usec  
PLW2 23.00000000 W  
PLW12 0.27515000 W  
PLW13 0.13840000 W

F2 - Processing parameters  
SI 32768  
SF 125.7577885 MHz  
WDW EM  
SSB 0  
LB No filename specified  
GB 0  
PC 1.40

<sup>13</sup>CNMR of Compound-D in DMSO-d<sub>6</sub>

## Elemental Composition Report

Page 1

### Single Mass Analysis

Tolerance = 1000.0 PPM / DBE: min = -1.5, max = 50.0

Selected filters: None

Monoisotopic Mass, Even Electron Ions

70 formula(e) evaluated with 1 results within limits (up to 1 best isotopic matches for each mass)

Elements Used:

C: 0-16 H: 0-16 N: 0-2 O: 0-5 S: 0-1 Cl: 0-1

GVBSK-HATU-01

511702A2301 9 (0.135) AM (Top,4, Ar,5000.0,195.38,1.00,LS 5); Sm (Mn, 2x1.00); Sb (1,40.00); Cm (7:9)

1: TOF MS ES+  
865

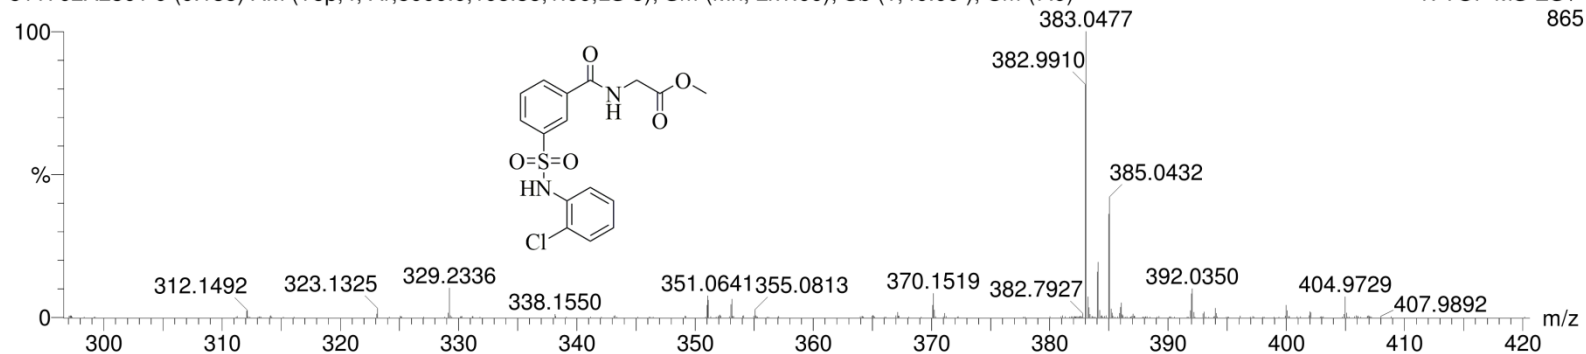

Minimum: -1.5  
Maximum: 5.0 1000.0 50.0

| Mass     | Calc. Mass | mDa | PPM | DBE | i-FIT | Formula            |
|----------|------------|-----|-----|-----|-------|--------------------|
| 383.0477 | 383.0468   | 0.9 | 2.3 | 9.5 | 1.8   | C16 H16 N2 O5 S Cl |

HRMS of Compound-D



GVB-SK-INT-4

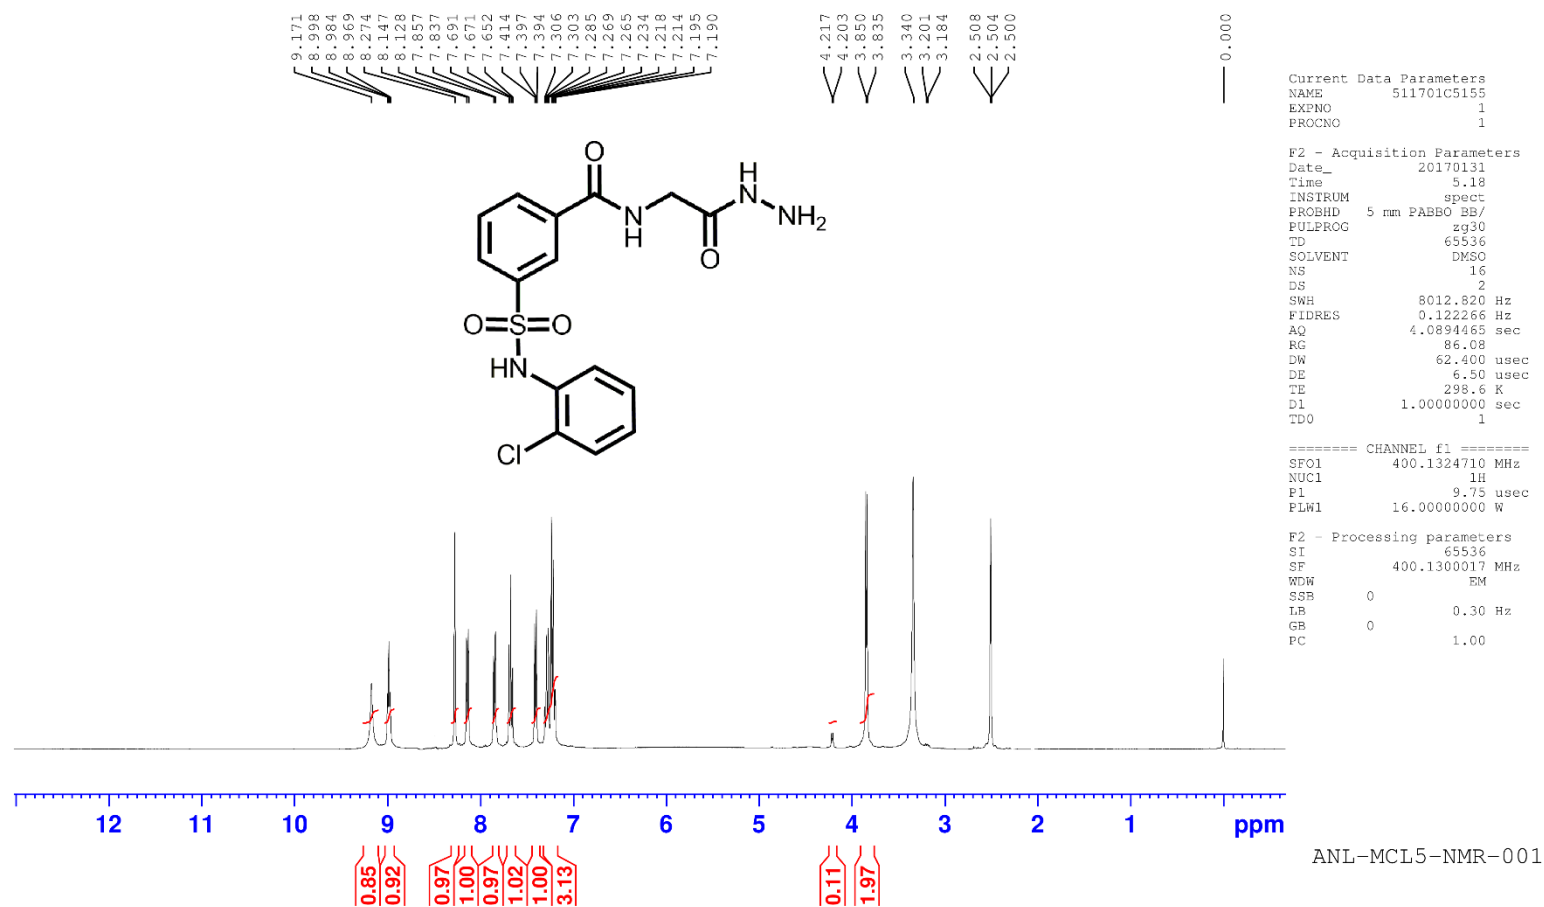

<sup>1</sup>H NMR of Compound-E

GVB-SK-INT-4

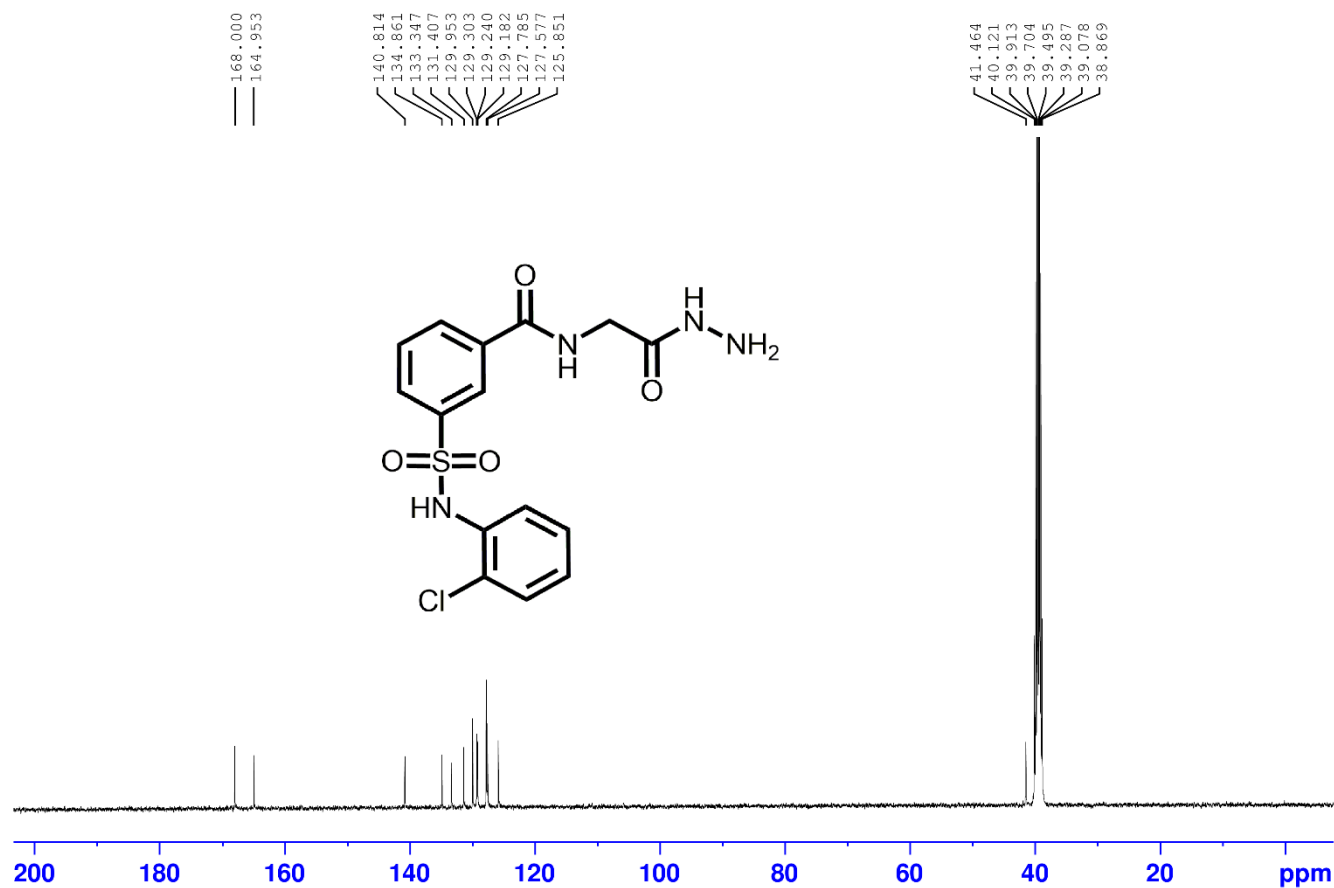

Current Data Parameters  
NAME 511701C5155  
EXPNO 2  
PROCNO 1

F2 - Acquisition Parameters  
Date\_ 20170131  
Time 6.03  
INSTRUM spect  
PROBHD 5 mm PABBO BB/  
PULPROG zgpg30  
TD 65536  
SOLVENT DMSO  
NS 1024  
DS 4  
SWH 24038.461 Hz  
FIDRES 0.366798 Hz  
AQ 1.3631488 sec  
RG 195.29  
DW 20.800 usec  
DE 6.50 usec  
TE 298.9 K  
D1 3.00000000 sec  
D11 0.03000000 sec  
TD0 1

===== CHANNEL f1 =====  
SFO1 100.6228293 MHz  
NUC1 13C  
P1 10.00 usec  
PLW1 78.00000000 W

===== CHANNEL f2 =====  
SFO2 400.1316005 MHz  
NUC2 1H  
CPDPRG2 waltz16  
PCPD2 90.00 usec  
PLW2 16.00000000 W  
PLW12 0.18777999 W  
PLW13 0.15210000 W

F2 - Processing parameters  
SI 32768  
SF 100.6128182 MHz  
WDW EM  
SSB 0  
LB 2.00 Hz  
GB 0  
PC 1.40

ANL-MCL5-NMR-001

<sup>13</sup>CNMR of Compound-E in DMSO-d<sub>6</sub>

## Elemental Composition Report

Page 1

### Single Mass Analysis

Tolerance = 1000.0 PPM / DBE: min = -1.5, max = 50.0

Selected filters: None

Monoisotopic Mass, Even Electron Ions

98 formula(e) evaluated with 1 results within limits (up to 1 best isotopic matches for each mass)

Elements Used:

C: 0-15 H: 0-16 N: 0-4 O: 0-4 S: 0-1 Cl: 0-1

GVB-SK-INT-4

511701C5154 8 (0.126) AM (Top,4, Ar,5000.0,195.39,1.00,LS 5); Sm (Mn, 2x1.00); Sb (1,40.00 )

1: TOF MS ES+  
3.45e3

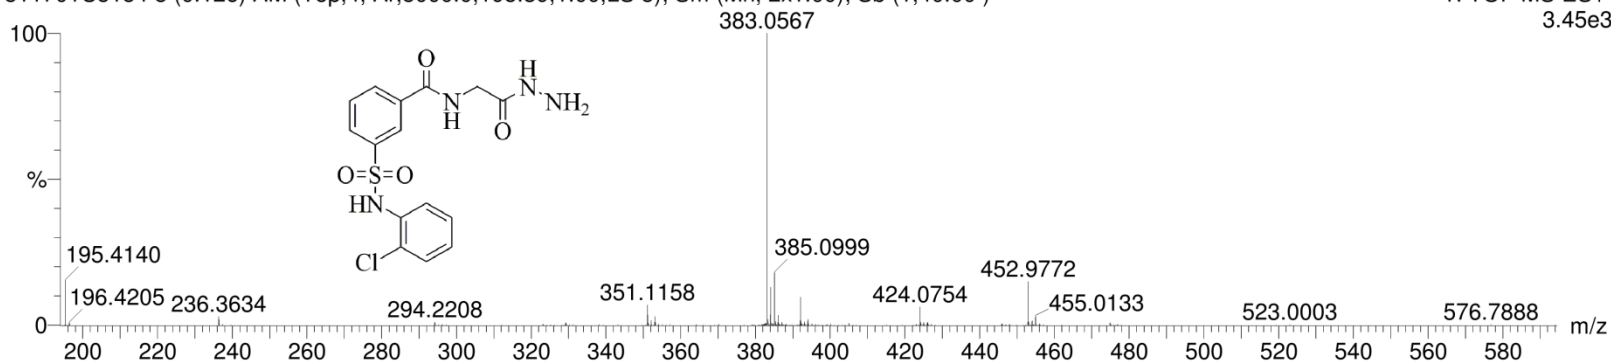

Minimum: -1.5  
Maximum: 5.0 1000.0 50.0

| Mass     | Calc. Mass | mDa  | PPM  | DBE | i-FIT | Formula            |
|----------|------------|------|------|-----|-------|--------------------|
| 383.0567 | 383.0581   | -1.4 | -3.7 | 9.5 | 266.2 | C15 H16 N4 O4 S Cl |

### HRMS of Compound-E

GVB-SA07  
 Reference Code: 511611A0309  
 Solvent: dmsd  
 Archive directory:  
 /home/gvkbio/data/2016/Nov  
 Agilent 400-MRDE2  
 Data collected on: Nov 12 2016  
 Experiment: PROTON

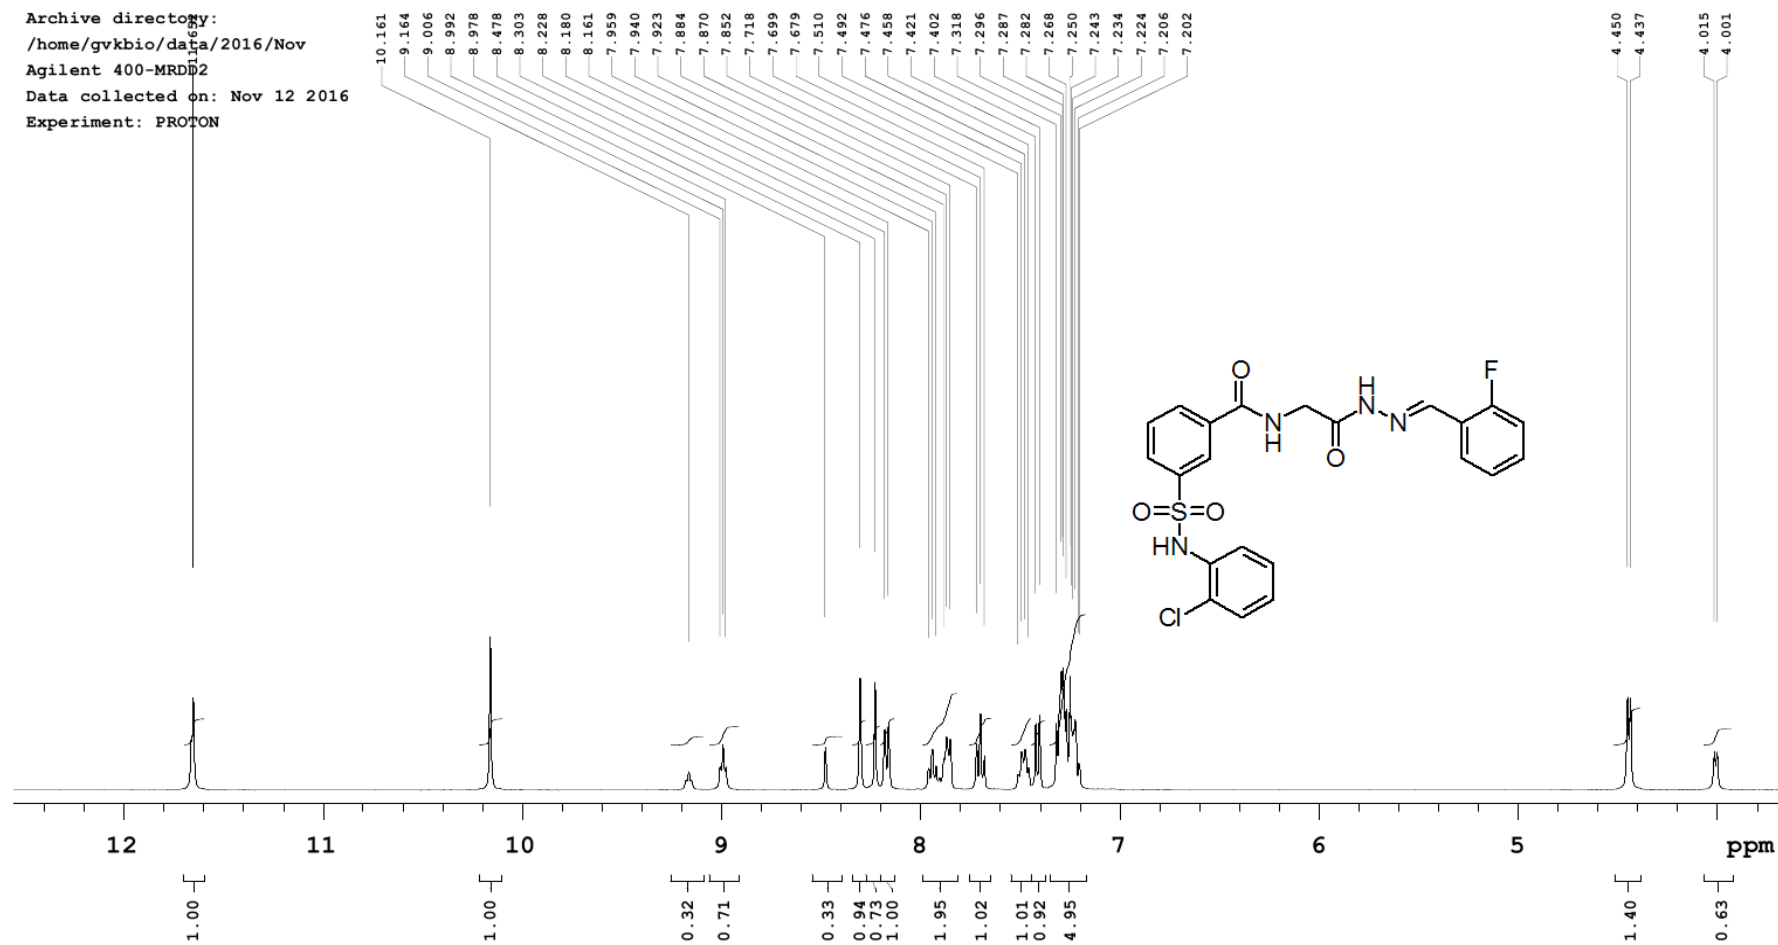

<sup>1</sup>H NMR of Compound-1a



## Elemental Composition Report

Page 1

### Single Mass Analysis

Tolerance = 10000.0 PPM / DBE: min = -1.5, max = 50.0

Selected filters: None

Monoisotopic Mass, Even Electron Ions

178 formula(e) evaluated with 2 results within limits (up to 1 closest results for each mass)

Elements Used:

C: 0-23 H: 0-19 N: 0-4 O: 0-4 F: 0-1 S: 0-1 Cl: 0-1

GVB-SA07

511611B4321 23 (0.341) AM (Top,4, Ar,5000.0,195.14,1.00,LS 10); Sm (Mn, 2x1.00); Sb (1,40.00)

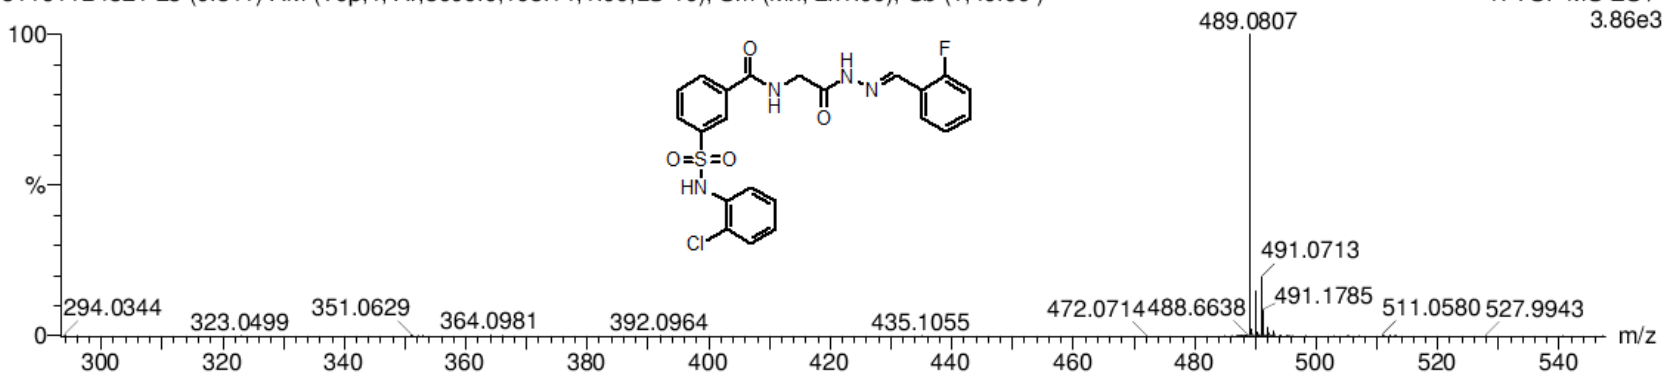

Minimum: -1.5  
Maximum: 5.0 10000.0 50.0

| Mass     | Calc. Mass | mDa | PPM | DBE  | i-FIT    | Formula              |
|----------|------------|-----|-----|------|----------|----------------------|
| 489.0807 | 489.0800   | 0.7 | 1.4 | 14.5 | 225054.8 | C22 H19 N4 O4 F S Cl |

### HRMS of Compound-1a

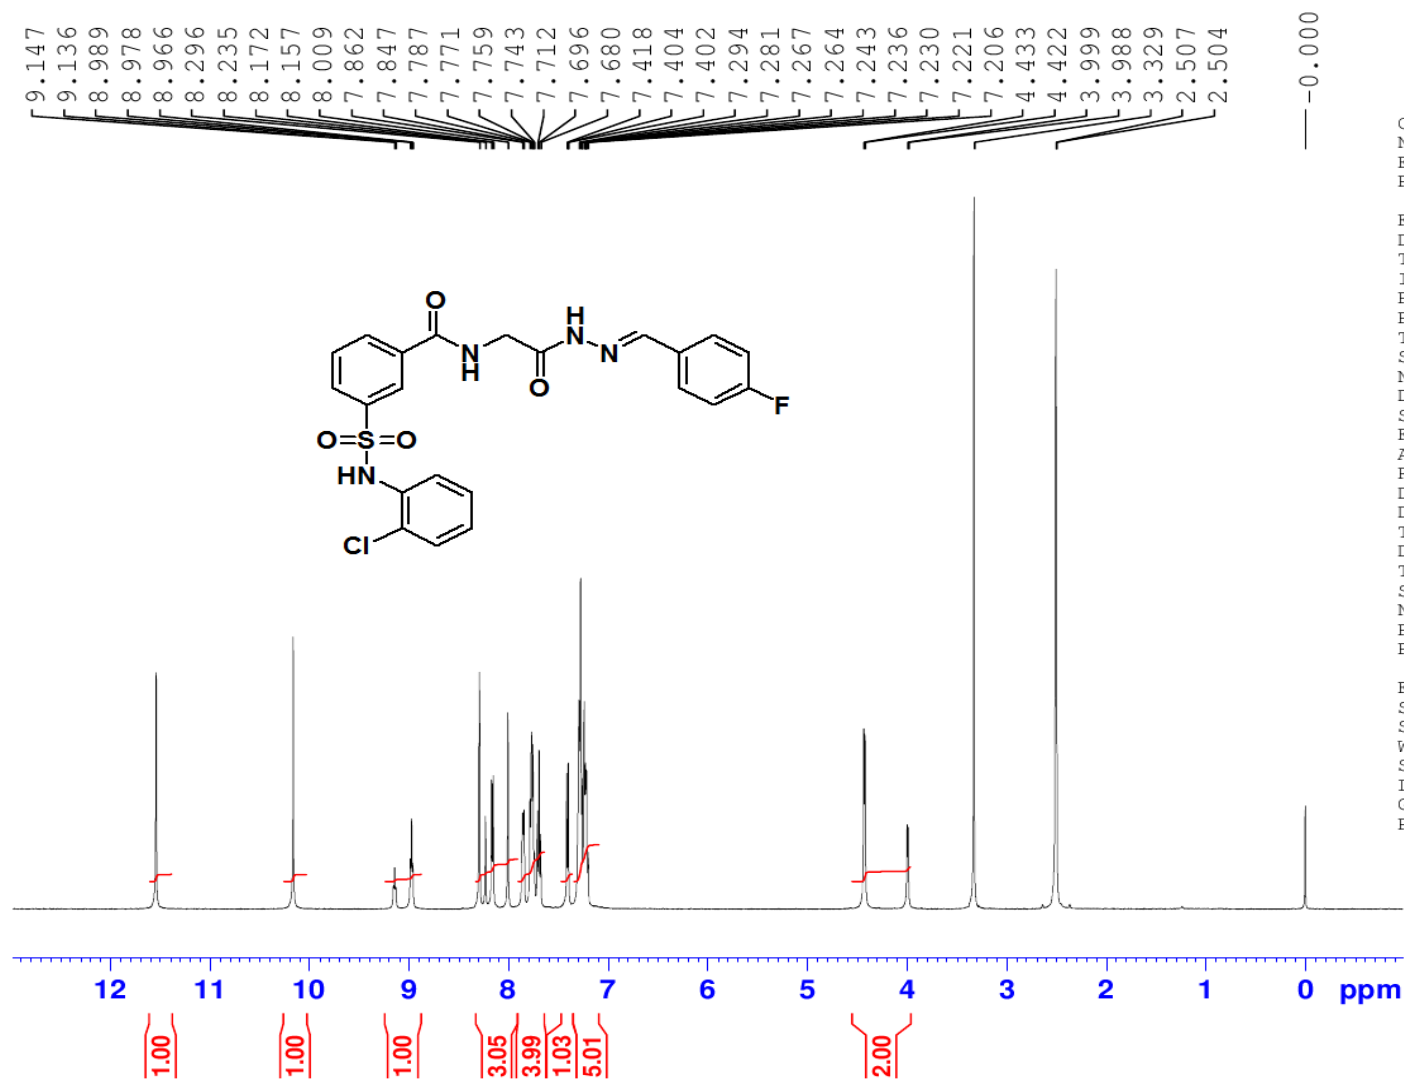

Current Data Parameters  
 NAME 511611A7711  
 EXPNO 2  
 PROCNO 1

F2 - Acquisition Parameters  
 Date\_ 20161110  
 Time 22.05 h  
 INSTRUM spect  
 PROBHD Z119470\_0231 (   
 PULPROG zg30  
 TD 65536  
 SOLVENT DMSO  
 NS 8  
 DS 0  
 SWH 10000.000 Hz  
 FIDRES 0.305176 Hz  
 AQ 3.2767999 sec  
 RG 118.49  
 DW 50.000 usec  
 DE 6.50 usec  
 TE 298.1 K  
 D1 1.00000000 sec  
 TD0 1  
 SFO1 500.1330885 MHz  
 NUC1 1H  
 P1 8.75 usec  
 PLW1 23.00000000 W

F2 - Processing parameters  
 SI 65536  
 SF 500.1300019 MHz  
 WDW EM  
 SSB 0  
 LB 0.30 Hz  
 GB 0  
 PC 1.00

<sup>1</sup>H NMR of Compound-1b

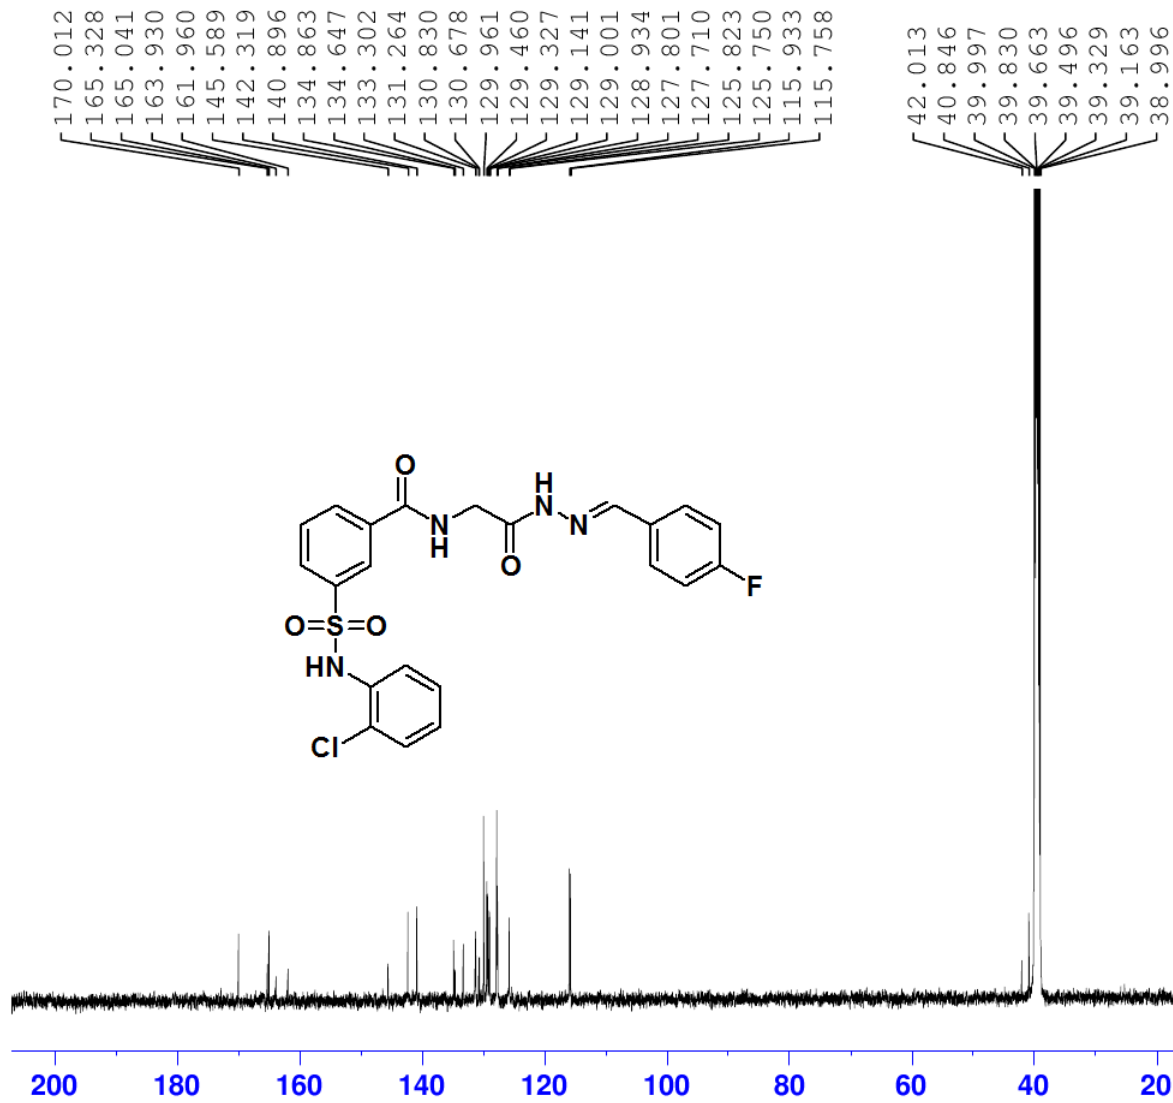

Current Data Parameters  
NAME 511611A7711  
EXPNO 3  
PROCNO 1

F2 - Acquisition Parameters  
Date\_ 20161110  
Time 23.18 h  
INSTRUM spect  
PROBHD Z119470\_0231 (  
PULPROG zgpg30  
TD 65536  
SOLVENT DMSO  
NS 1024  
DS 4  
SWH 29761.904 Hz  
FIDRES 0.908261 Hz  
AQ 1.1010048 sec  
RG 197.72  
DW 16.800 usec  
DE 6.50 usec  
TE 298.1 K  
D1 3.00000000 sec  
D11 0.03000000 sec  
TD0 1  
SFO1 125.7703643 MHz  
NUC1 13C  
P1 9.50 usec  
PLW1 88.00000000 W  
SFO2 500.1320005 MHz  
NUC2 1H  
CPDPRG[2] waltz16  
PCPD2 80.00 usec  
PLW2 23.00000000 W  
PLW12 0.27515000 W  
PLW13 0.13840000 W

F2 - Processing parameters  
SI 32768  
SF 125.7578513 MHz  
WDW EM  
SSB 0  
LB 2.00 Hz  
GB 0  
PC 1.40

<sup>13</sup>CNMR of **Compound-1b** in DMSO-d<sub>6</sub>



## Elemental Composition Report

Page 1

### Single Mass Analysis

Tolerance = 10000.0 PPM / DBE: min = -1.5, max = 50.0

Selected filters: None

Monoisotopic Mass, Even Electron Ions

190 formula(e) evaluated with 1 results within limits (up to 1 closest results for each mass)

Elements Used:

C: 0-22 H: 0-19 N: 0-4 O: 0-4 F: 0-1 S: 0-1 Cl: 0-1

GVB-SA01

511611B4315 25 (0.360) AM (Top,4, Ar,5000.0,195.16,1.00,LS 10); Sm (Mn, 2x1.00); Sb (1,40.00 )

1: TOF MS ES+  
1.62e3

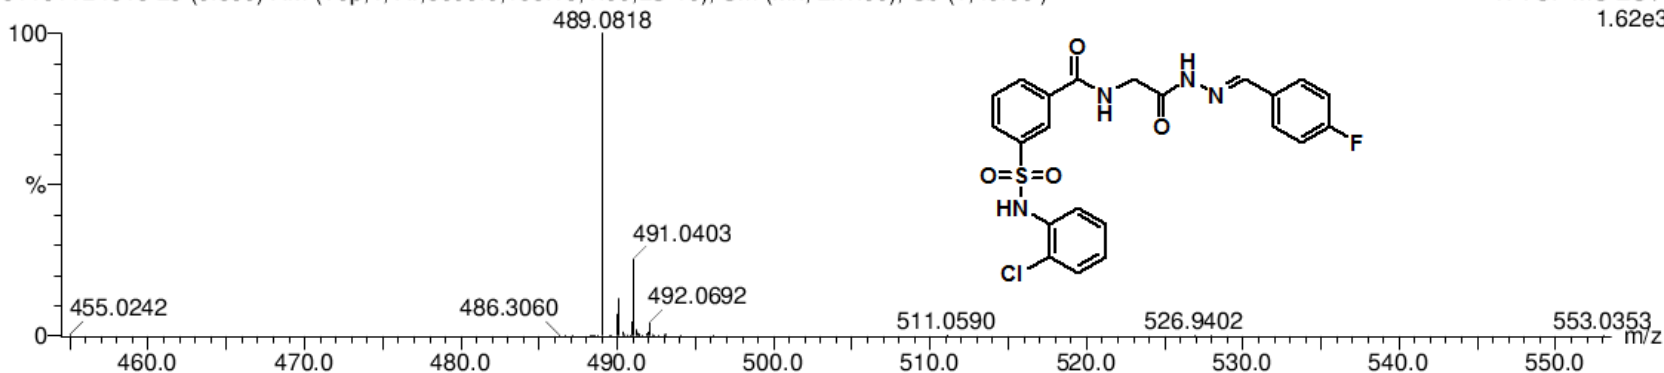

Minimum: -1.5  
Maximum: 5.0 10000.0 50.0

| Mass     | Calc. Mass | mDa | PPM | DBE  | i-FIT   | Formula              |
|----------|------------|-----|-----|------|---------|----------------------|
| 489.0818 | 489.0800   | 1.8 | 3.7 | 14.5 | 94405.7 | C22 H19 N4 O4 F S Cl |

### HRMS of Compound-1b

GVB-SA02  
AT 100°C

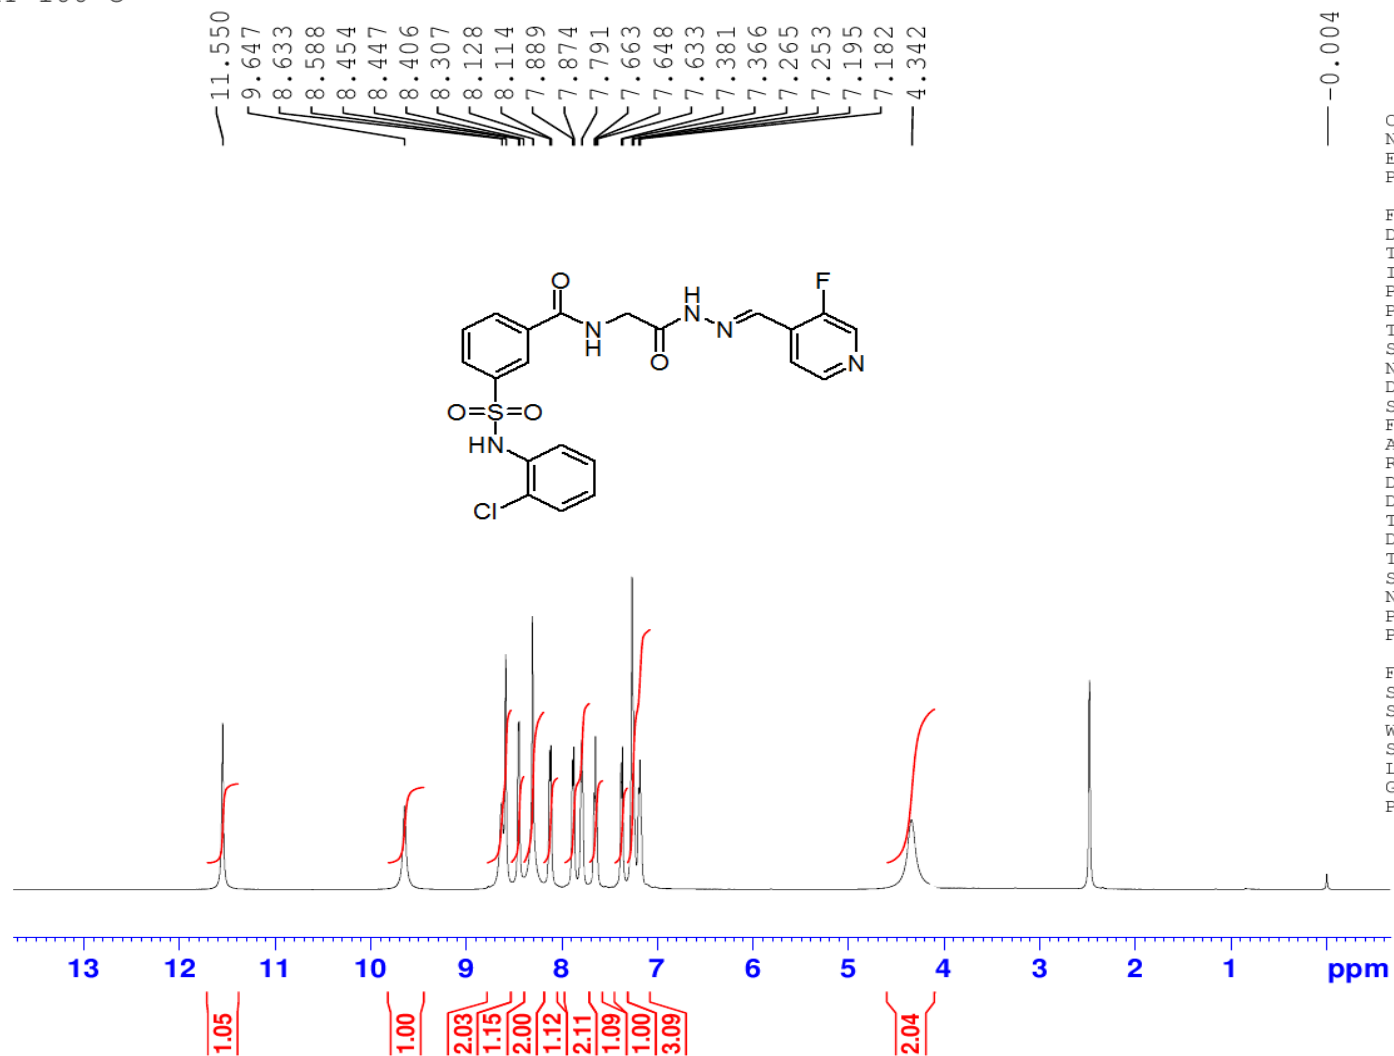

Current Data Parameters  
NAME 511611A7714  
EXPNO 1  
PROCNO 1

F2 - Acquisition Parameters  
Date\_ 20161110  
Time 19.50 h  
INSTRUM spect  
PROBHD Z119470\_0231 (  
PULPROG zg30  
TD 65536  
SOLVENT DMSO  
NS 32  
DS 0  
SWH 10000.000 Hz  
FIDRES 0.305176 Hz  
AQ 3.2767999 sec  
RG 111.07  
DW 50.000 usec  
DE 6.50 usec  
TE 373.2 K  
D1 1.00000000 sec  
TD0 1  
SFO1 500.1330885 MHz  
NUC1 1H  
P1 8.75 usec  
PLW1 23.00000000 W

F2 - Processing parameters  
SI 65536  
SF 500.1300146 MHz  
WDW EM  
SSB 0  
LB 0.30 Hz  
GB 0  
PC 1.00

<sup>1</sup>H NMR of Compound-1c at 100°C

GVB-SA02

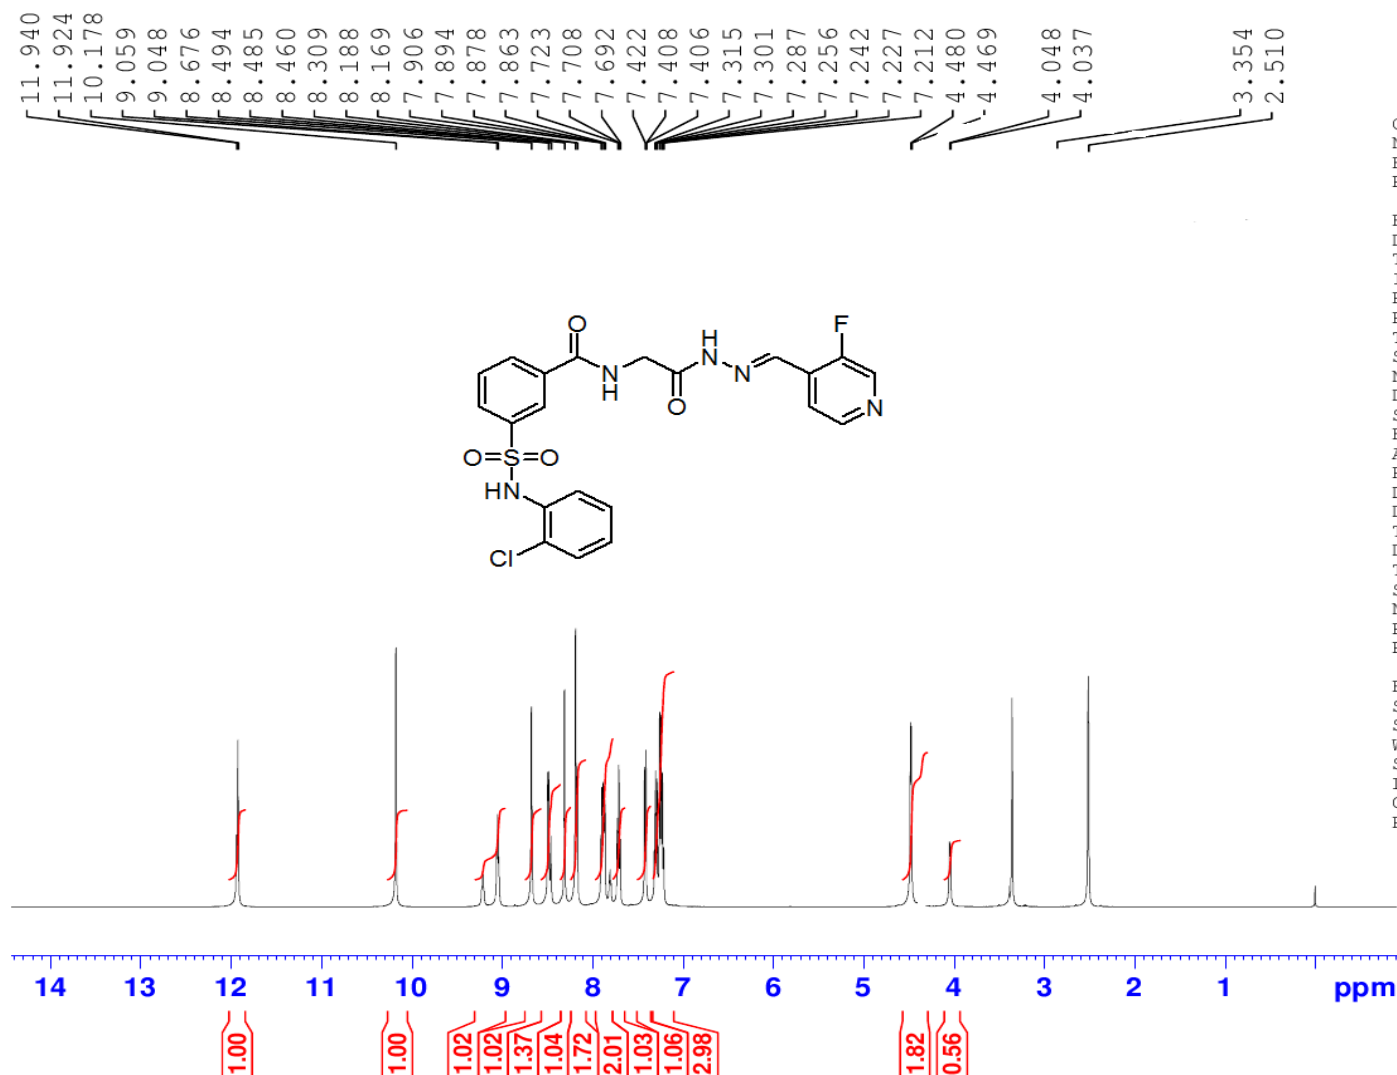

Current Data Parameters  
 NAME 511611A7714  
 EXPNO 2  
 PROCNO 1

F2 - Acquisition Parameters  
 Date\_ 20161110  
 Time 22.02 h  
 INSTRUM spect  
 PROBHD Z119470\_0231 (   
 PULPROG zg30  
 TD 65536  
 SOLVENT DMSO  
 NS 8  
 DS 0  
 SWH 10000.000 Hz  
 FIDRES 0.305176 Hz  
 AQ 3.2767999 sec  
 RG 79.68  
 DW 50.000 usec  
 DE 6.50 usec  
 TE 298.1 K  
 D1 1.00000000 sec  
 TD0 1  
 SFO1 500.1330885 MHz  
 NUC1 1H  
 P1 8.75 usec  
 PLW1 23.00000000 W

F2 - Processing parameters  
 SI 65536  
 SF 500.1299986 MHz  
 WDW EM  
 SSB 0  
 LB 0.30 Hz  
 GB 0  
 PC 1.00

<sup>1</sup>H NMR of Compound-1c

GVB-SA02

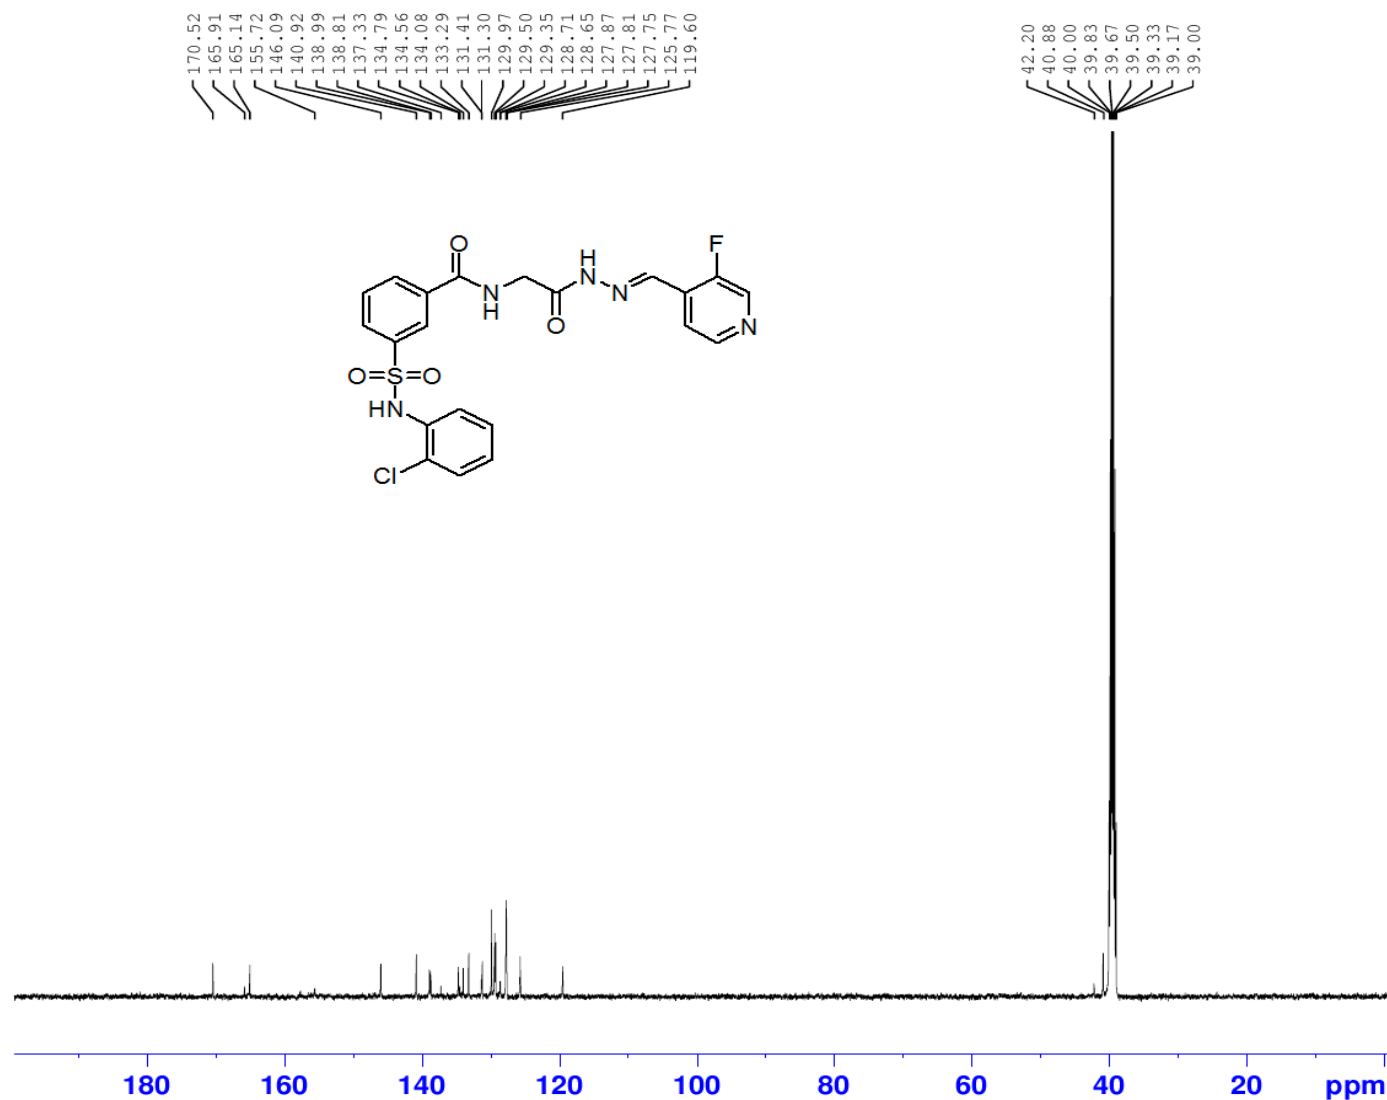

Current Data Parameters  
 NAME 511611A7714  
 EXPNO 4  
 PROCNO 1

F2 - Acquisition Parameters  
 Date\_ 20161112  
 Time 12.18 h  
 INSTRUM spect  
 PROBHD Z119470\_0231 (  
 PULPROG zgpg30  
 TD 65536  
 SOLVENT DMSO  
 NS 1024  
 DS 4  
 SWH 29761.904 Hz  
 FIDRES 0.908261 Hz  
 AQ 1.1010048 sec  
 RG 197.72  
 DW 16.800 usec  
 DE 6.50 usec  
 TE 298.2 K  
 D1 3.00000000 sec  
 D11 0.03000000 sec  
 TD0 1  
 SFO1 125.7703643 MHz  
 NUC1 13C  
 P1 9.50 usec  
 PLW1 88.00000000 W  
 SFO2 500.1320005 MHz  
 NUC2 1H  
 CPDPRG[2] waltz16  
 PCPD2 80.00 usec  
 PLW2 23.00000000 W  
 PLW12 0.27515000 W  
 PLW13 0.13840000 W

F2 - Processing parameters  
 SI 32768  
 SF 125.7578493 MHz  
 WDW EM  
 SSB 0  
 LB 2.00 Hz  
 GB 0  
 PC 1.40

<sup>13</sup>CNMR of Compound-1c in DMSO-d<sub>6</sub>

## Elemental Composition Report

Page 1

### Single Mass Analysis

Tolerance = 10000.0 PPM / DBE: min = -1.5, max = 50.0

Selected filters: None

Monoisotopic Mass, Even Electron Ions

230 formula(e) evaluated with 1 results within limits (up to 1 closest results for each mass)

Elements Used:

C: 0-21 H: 0-18 N: 0-5 O: 0-4 F: 0-1 S: 0-1 Cl: 0-1

GVB-SA02

511611B4316 23 (0.343) AM (Top,4, Ar,5000.0,195.16,1.00,LS 10); Sm (Mn, 2x1.00); Sb (1,40.00 )

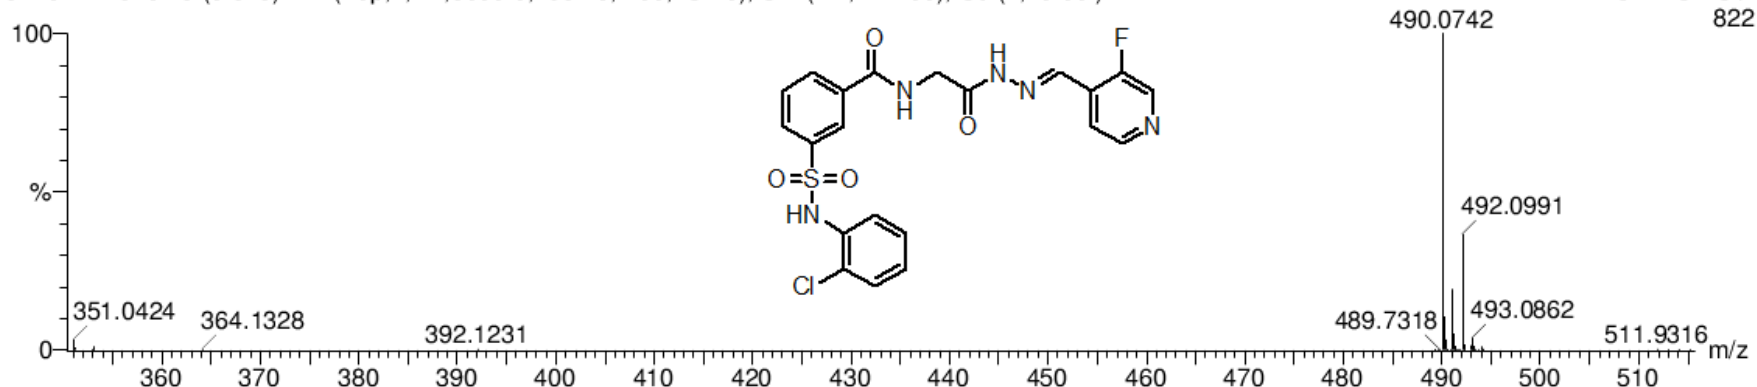

Minimum: -1.5  
Maximum: 5.0 10000.0 50.0

| Mass     | Calc. Mass | mDa  | PPM  | DBE  | i-FIT   | Formula              |
|----------|------------|------|------|------|---------|----------------------|
| 490.0742 | 490.0752   | -1.0 | -2.0 | 14.5 | 47774.1 | C21 H18 N5 O4 F S Cl |

HRMS of Compound-1c

GVB-SA06  
 Reference Code: 511611A0304  
 Solvent: dms  
 Archive directory:  
 /home/gvkbio/data/2016/Nov  
 Agilent 400-MRDD2  
 Data collected on: Nov 12 2016  
 Experiment: PROTON

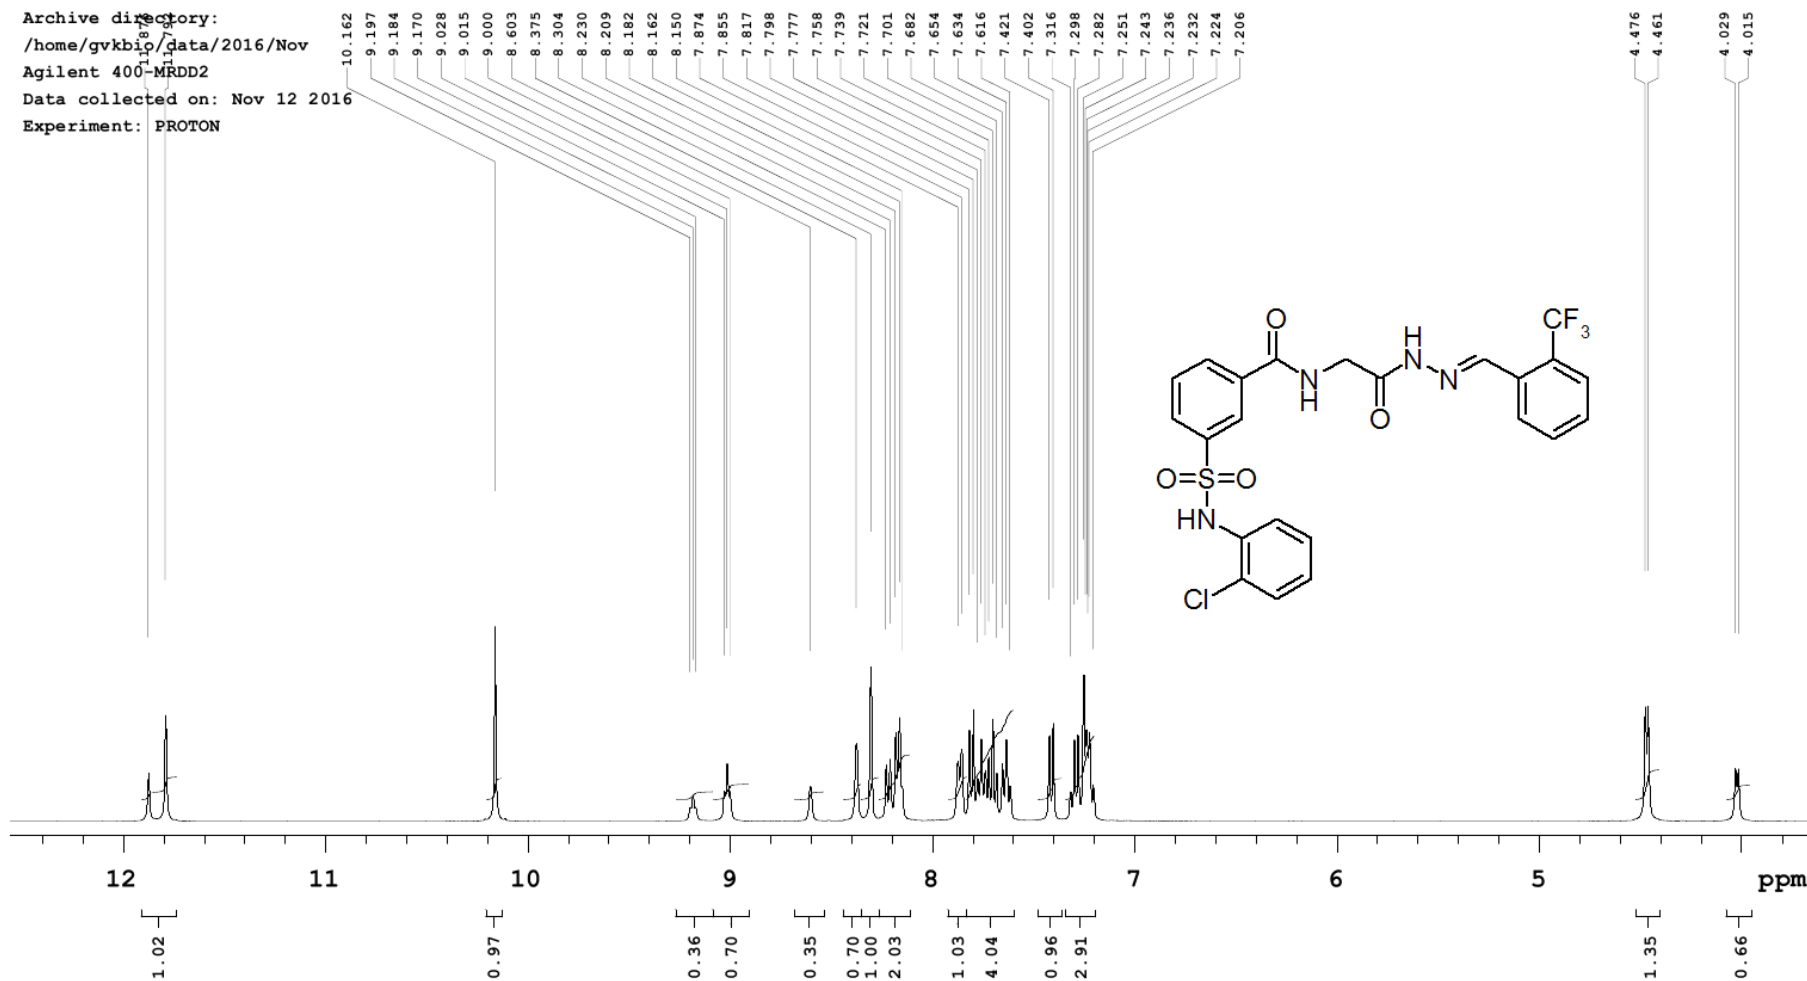

$^1\text{H}$  NMR of **Compound-1d** in DMSO- $\text{d}_6$



## Elemental Composition Report

Page 1

### Single Mass Analysis

Tolerance = 10000.0 PPM / DBE: min = -1.5, max = 50.0

Selected filters: None

Monoisotopic Mass, Even Electron Ions

389 formula(e) evaluated with 1 results within limits (up to 1 closest results for each mass)

Elements Used:

C: 0-23 H: 0-19 N: 0-4 O: 0-4 F: 0-3 S: 0-1 Cl: 0-1

GVB-SA06

511611B4320 22 (0.329) AM (Top,4, Ar,5000.0,195.15,1.00,LS 10); Sm (Mn, 2x1.00); Sb (1,40.00)

1: TOF MS ES+  
3.85e3

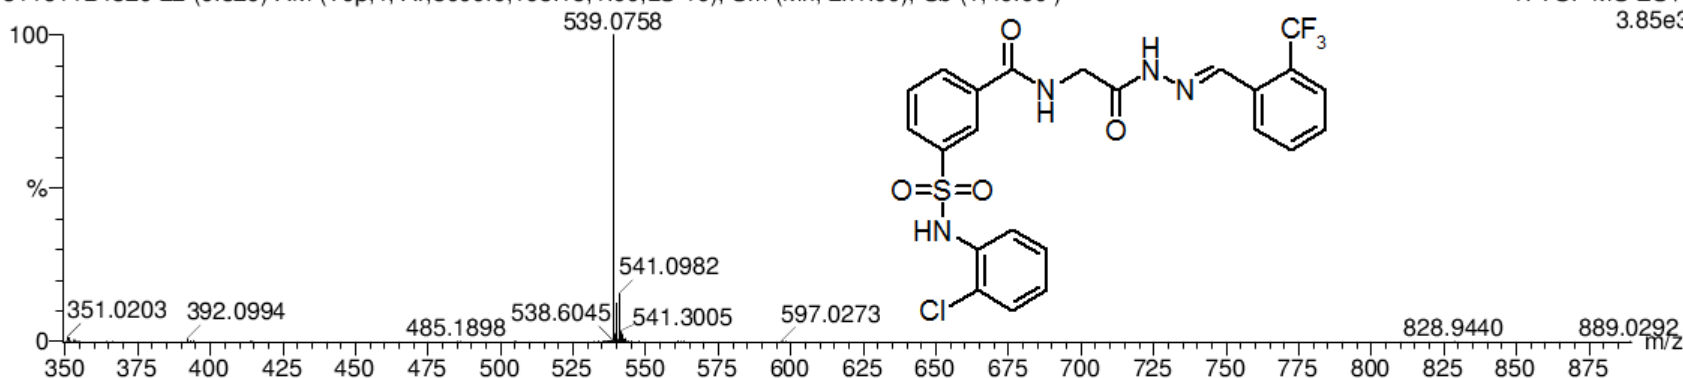

Minimum: -1.5  
Maximum: 5.0 10000.0 50.0

| Mass     | Calc. Mass | mDa  | PPM  | DBE  | i-FIT    | Formula                                                                           |
|----------|------------|------|------|------|----------|-----------------------------------------------------------------------------------|
| 539.0758 | 539.0768   | -1.0 | -1.9 | 14.5 | 185151.5 | C <sub>23</sub> H <sub>19</sub> N <sub>4</sub> O <sub>4</sub> F <sub>3</sub> S Cl |

### HRMS of Compound-1d



GVB-SA05  
 Reference Code: 511611B0303  
 Solvent: dmsd  
 Archive directory:  
 /home/gvkbio/data/2016/Nov  
 Agilent 400-MRDD2  
 Data collected on: Nov 11 2016  
 Experiment: PROTON

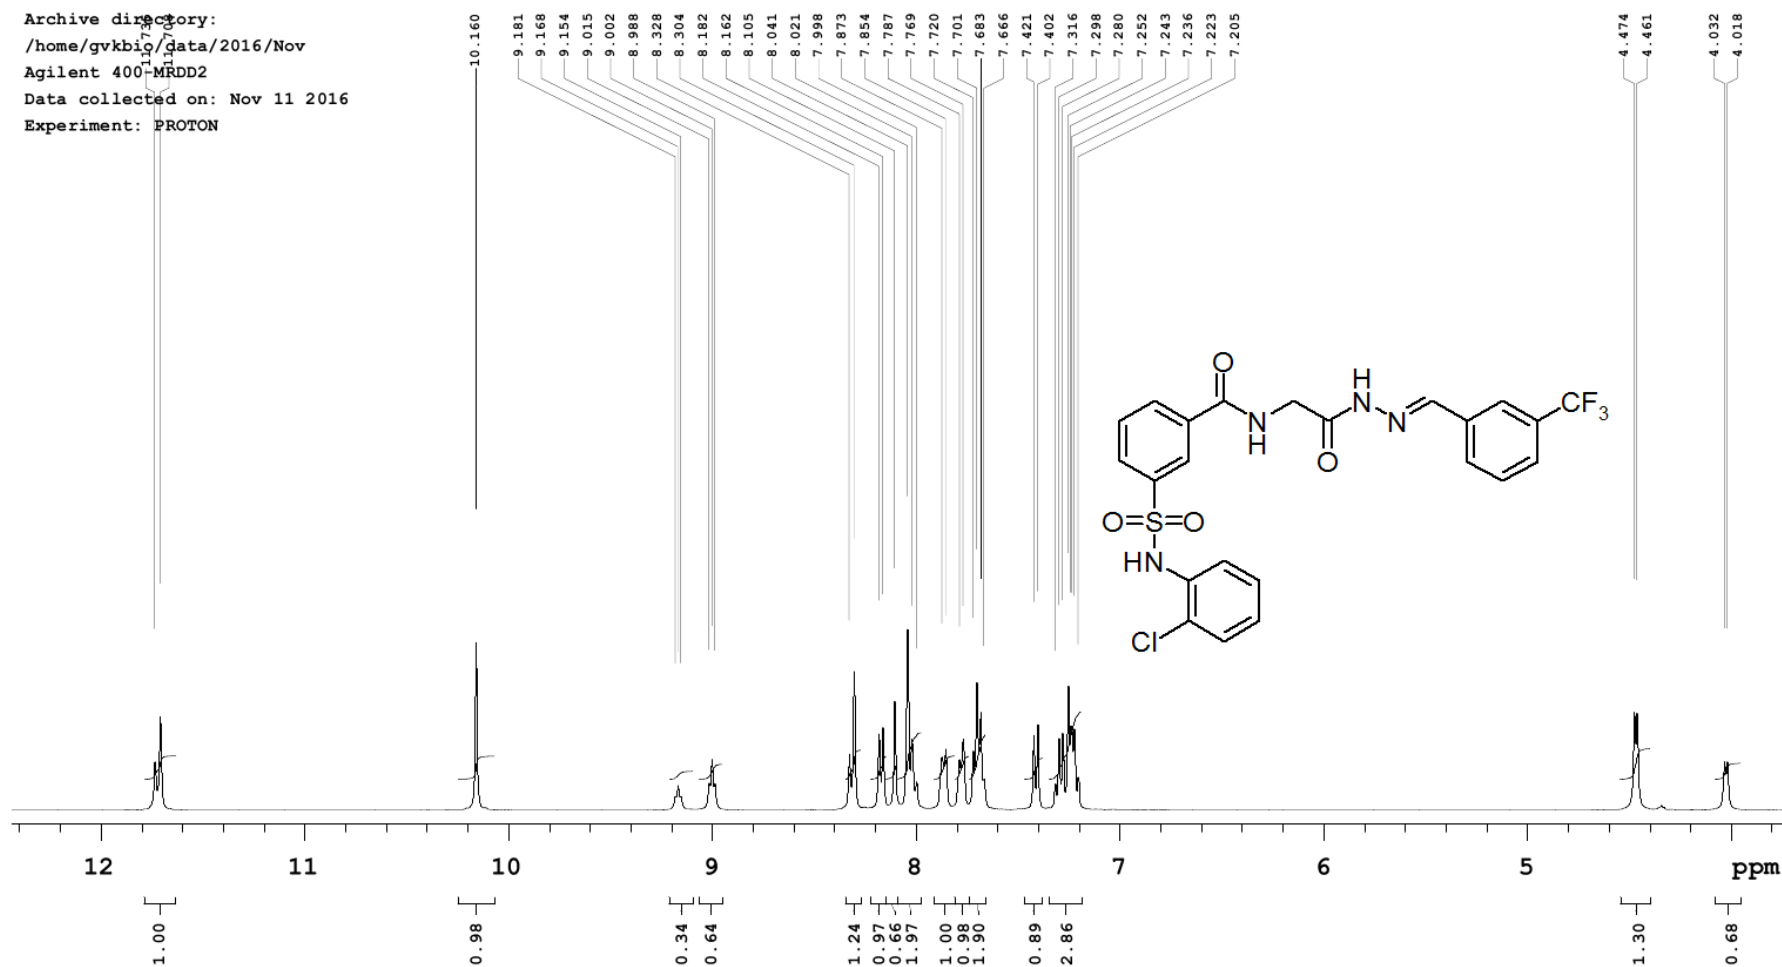

<sup>1</sup>H NMR of **Compound-1e** in DMSO-d<sub>6</sub>

GVB-SA05

Reference Code: 511611B0303

Solvent: dms

Archive directory:

/home/gvkbio/data/2016/Nov

Agilent 400-MRDD2

Data collected on: Nov 11 2016

Experiment: CARBON

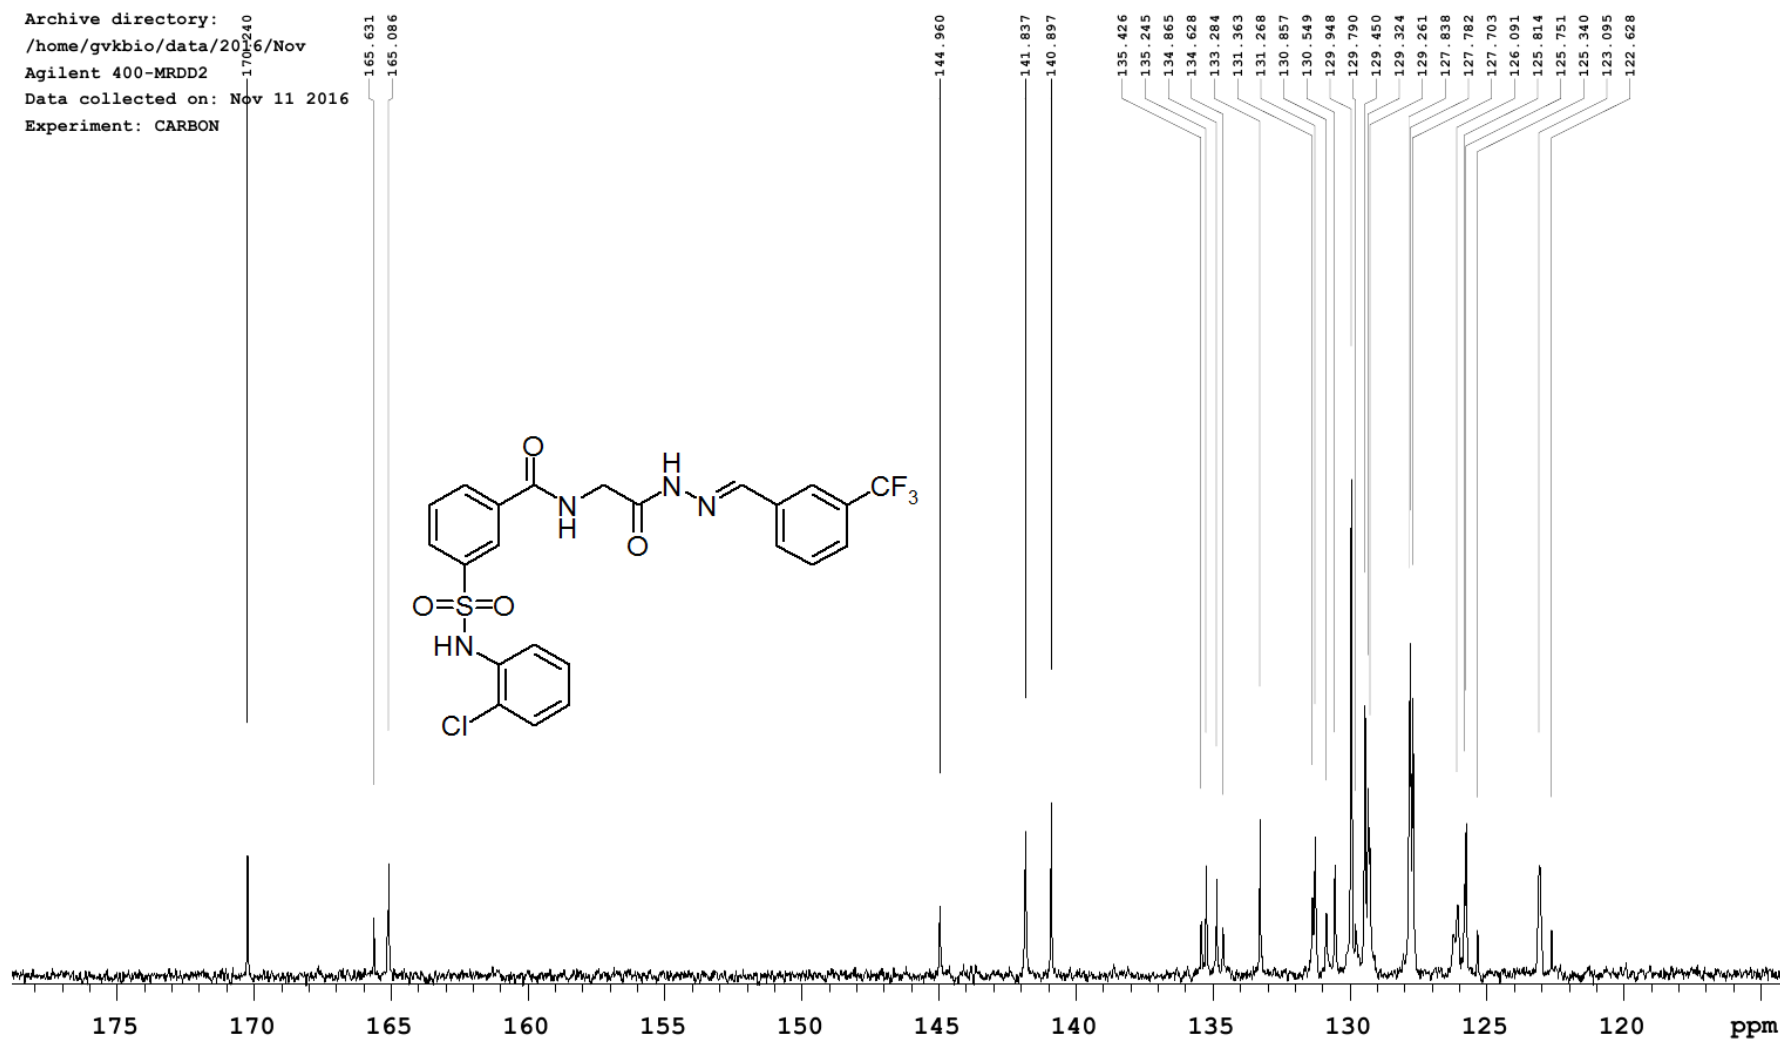

<sup>13</sup>CNMR of **Compound-1e** in DMSO-d<sub>6</sub>

## Elemental Composition Report

Page 1

### Single Mass Analysis

Tolerance = 10000.0 PPM / DBE: min = -1.5, max = 50.0

Selected filters: None

Monoisotopic Mass, Even Electron Ions

389 formula(e) evaluated with 1 results within limits (up to 1 closest results for each mass)

Elements Used:

C: 0-23 H: 0-19 N: 0-4 O: 0-4 F: 0-3 S: 0-1 Cl: 0-1

GVB-SA05

511611B4319 22 (0.330) AM (Top,4, Ar,5000.0,195.18,1.00,LS 10); Sm (Mn, 2x1.00); Sb (1,40.00)

1: TOF MS ES+  
3.80e3

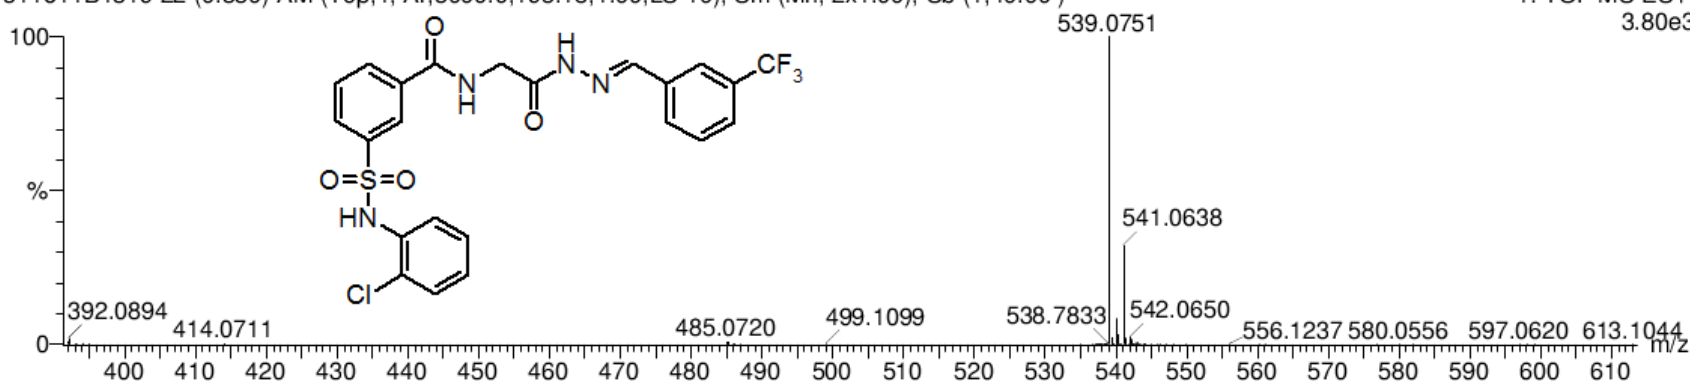

Minimum: -1.5  
Maximum: 5.0 10000.0 50.0

| Mass     | Calc. Mass | mDa  | PPM  | DBE  | i-FIT    | Formula               |
|----------|------------|------|------|------|----------|-----------------------|
| 539.0751 | 539.0768   | -1.7 | -3.2 | 14.5 | 182666.4 | C23 H19 N4 O4 F3 S Cl |

HRMS of Compound-1e

GVB-SA04  
 Reference Code: 511611B0302  
 Solvent: dmsc  
 Archive directory:  
 /home/gvkbio/data/2016/Nov  
 Agilent 400-MRDD2  
 Data collected on: Nov 11 2016  
 Experiment: PROTON

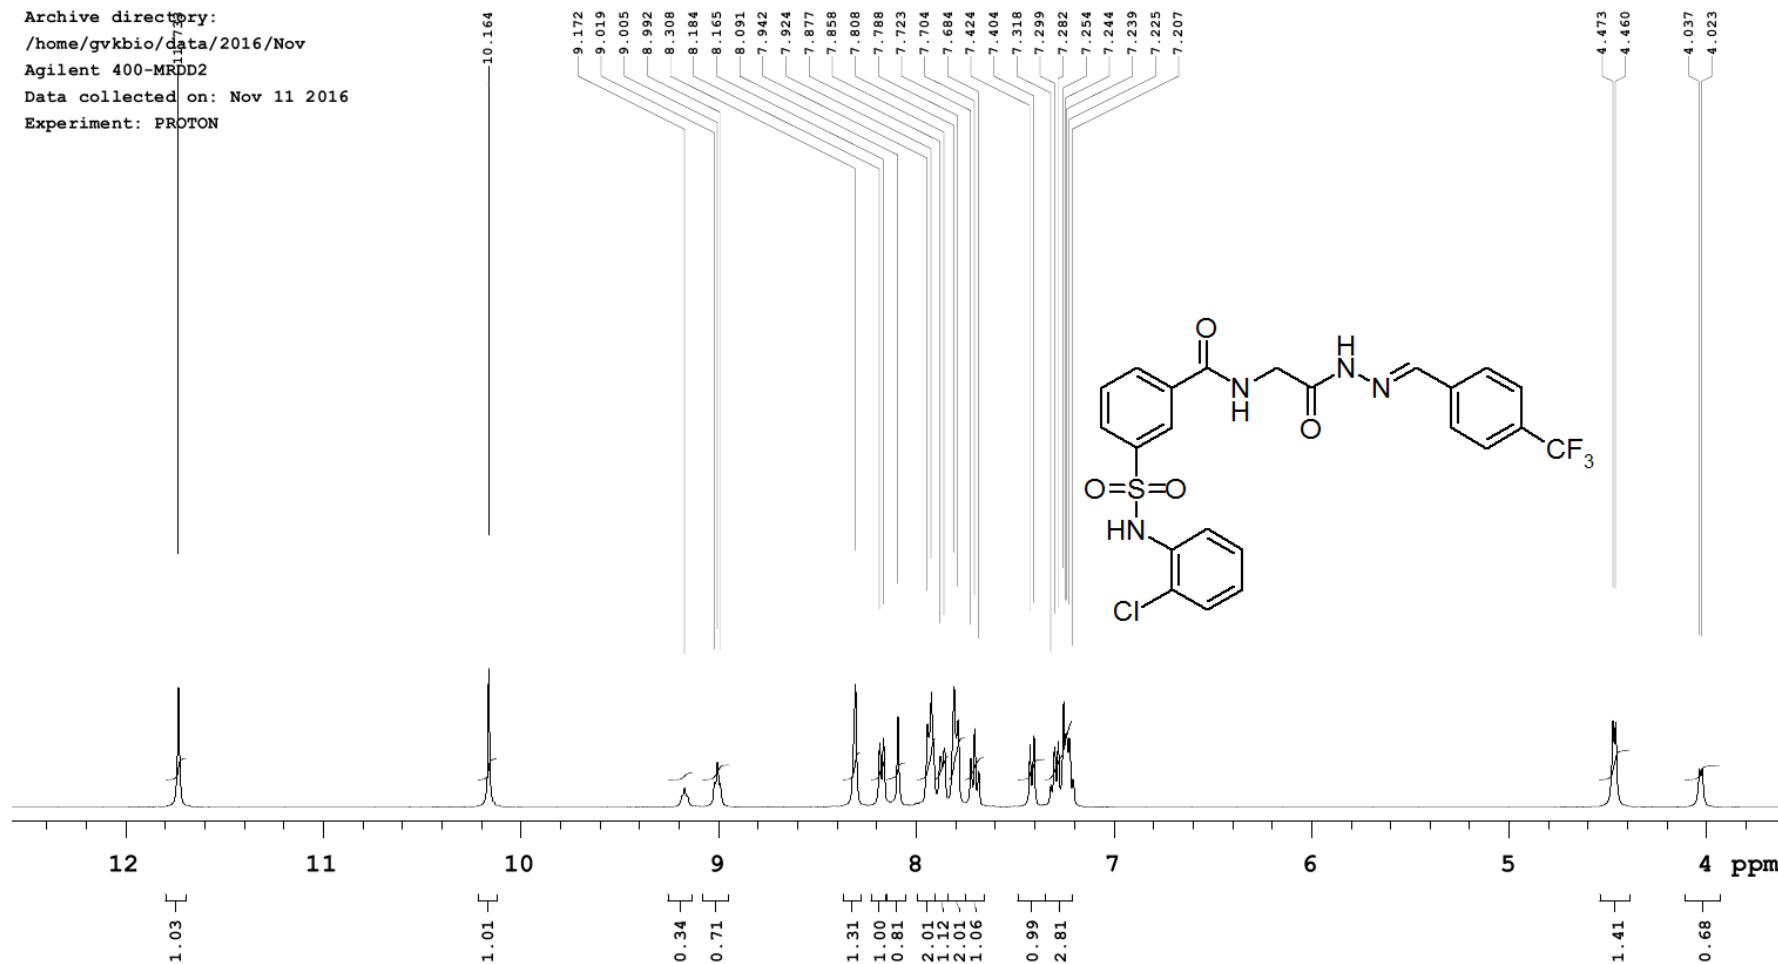

<sup>1</sup>H NMR of **Compound-1f** in DMSO-d<sub>6</sub>

GVB-SA04

Reference Code: 511611B0302

Solvent: dms

Archive directory:

/home/gvkbio/data/2016

Agilent 400-MRDD2

Data collected on: Nov 11 2016

Experiment: CARBON

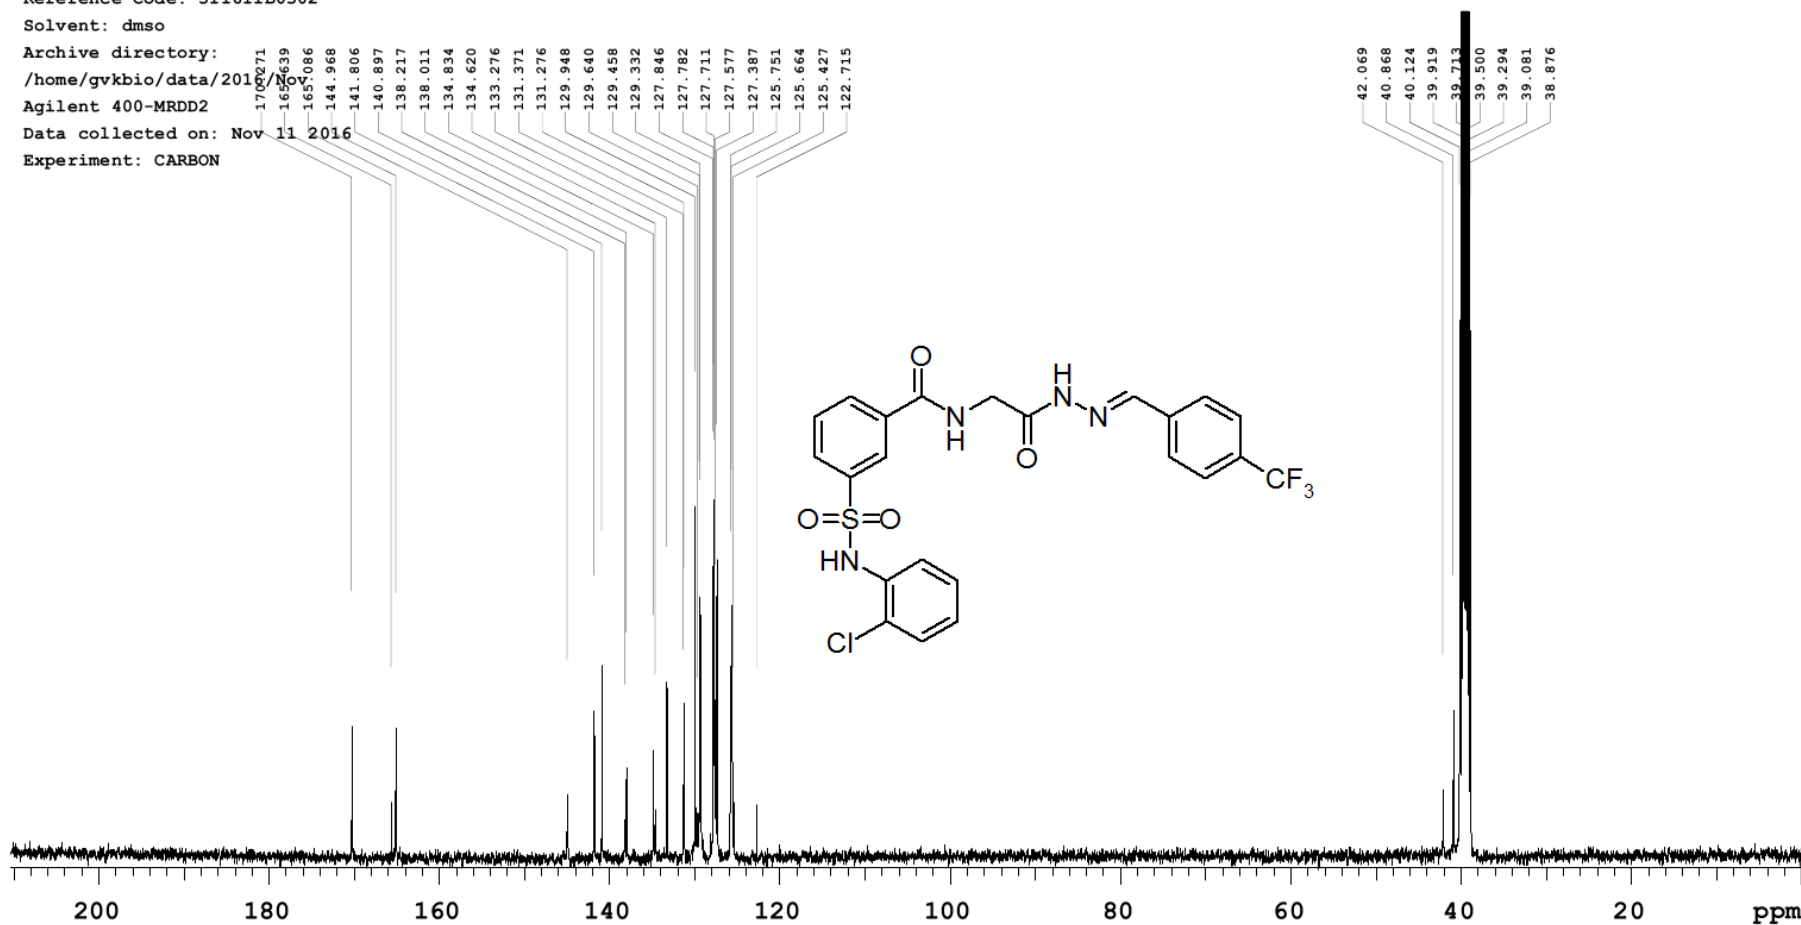

<sup>13</sup>CNMR of Compound-1f in DMSO-d<sub>6</sub>

## Elemental Composition Report

Page 1

### Single Mass Analysis

Tolerance = 10000.0 PPM / DBE: min = -1.5, max = 50.0

Selected filters: None

Monoisotopic Mass, Even Electron Ions

389 formula(e) evaluated with 1 results within limits (up to 1 closest results for each mass)

Elements Used:

C: 0-23 H: 0-19 N: 0-4 O: 0-4 S: 0-1 Cl: 0-1 F: 0-3

GVB-SA04

511611B4318 23 (0.339) AM (Top,4, Ar,5000.0,195.17,1.00,LS 10); Sm (Mn, 2x1.00); Sb (1,40.00)

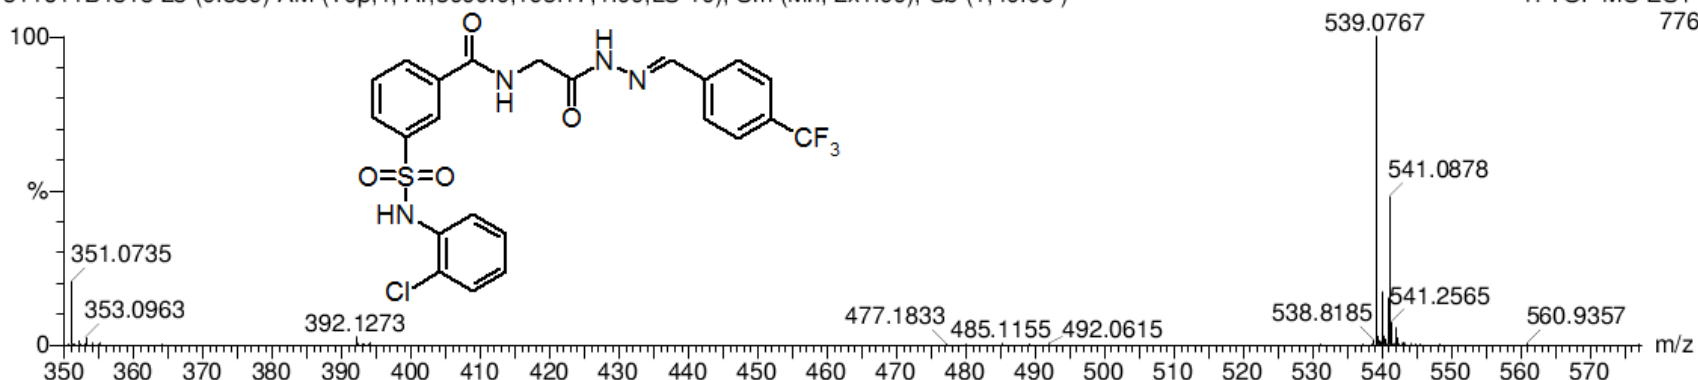

Minimum: -1.5  
Maximum: 5.0 10000.0 50.0

| Mass     | Calc. Mass | mDa  | PPM  | DBE  | i-FIT   | Formula               |
|----------|------------|------|------|------|---------|-----------------------|
| 539.0767 | 539.0768   | -0.1 | -0.2 | 14.5 | 37263.6 | C23 H19 N4 O4 S Cl F3 |

HRMS of Compound-1f

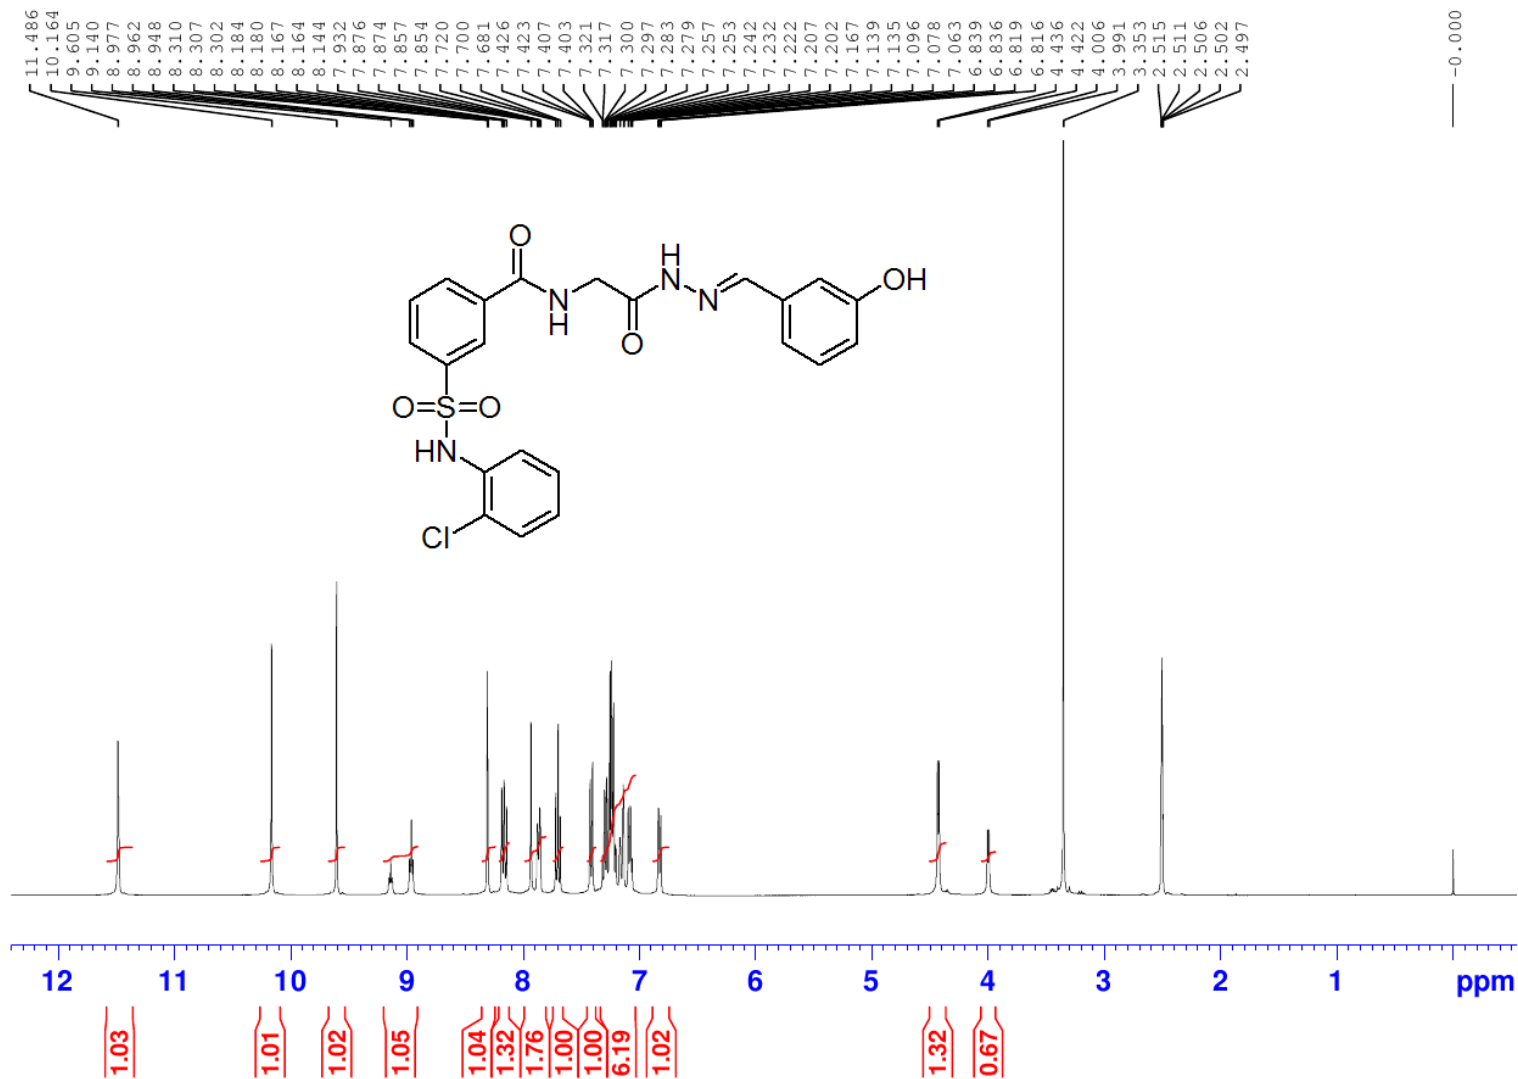

Current Data Parameters  
NAME 511611B0311  
EXPNO 1  
PROCNO 1

F2 - Acquisition Parameters  
Date\_ 20161114  
Time 4.03  
INSTRUM spect  
PROBHD 5 mm PABBO BB/  
PULPROG zg30  
TD 65536  
SOLVENT DMSO  
NS 16  
DS 2  
SWH 8012.820 Hz  
FIDRES 0.122266 Hz  
AQ 4.0894465 sec  
RG 86.08  
DW 62.400 usec  
DE 6.50 usec  
TE 299.5 K  
D1 1.00000000 sec  
TD0 1

===== CHANNEL f1 =====  
SFO1 400.1324710 MHz  
NUC1 1H  
P1 9.75 usec  
PLW1 16.00000000 W

F2 - Processing parameters  
SI 65536  
SF 400.1300010 MHz  
WDW EM  
SSB 0  
LB 0.30 Hz  
GB 0  
PC 1.00

<sup>1</sup>H NMR of **Compound-1g** in DMSO-d<sub>6</sub>

GVB-SA08

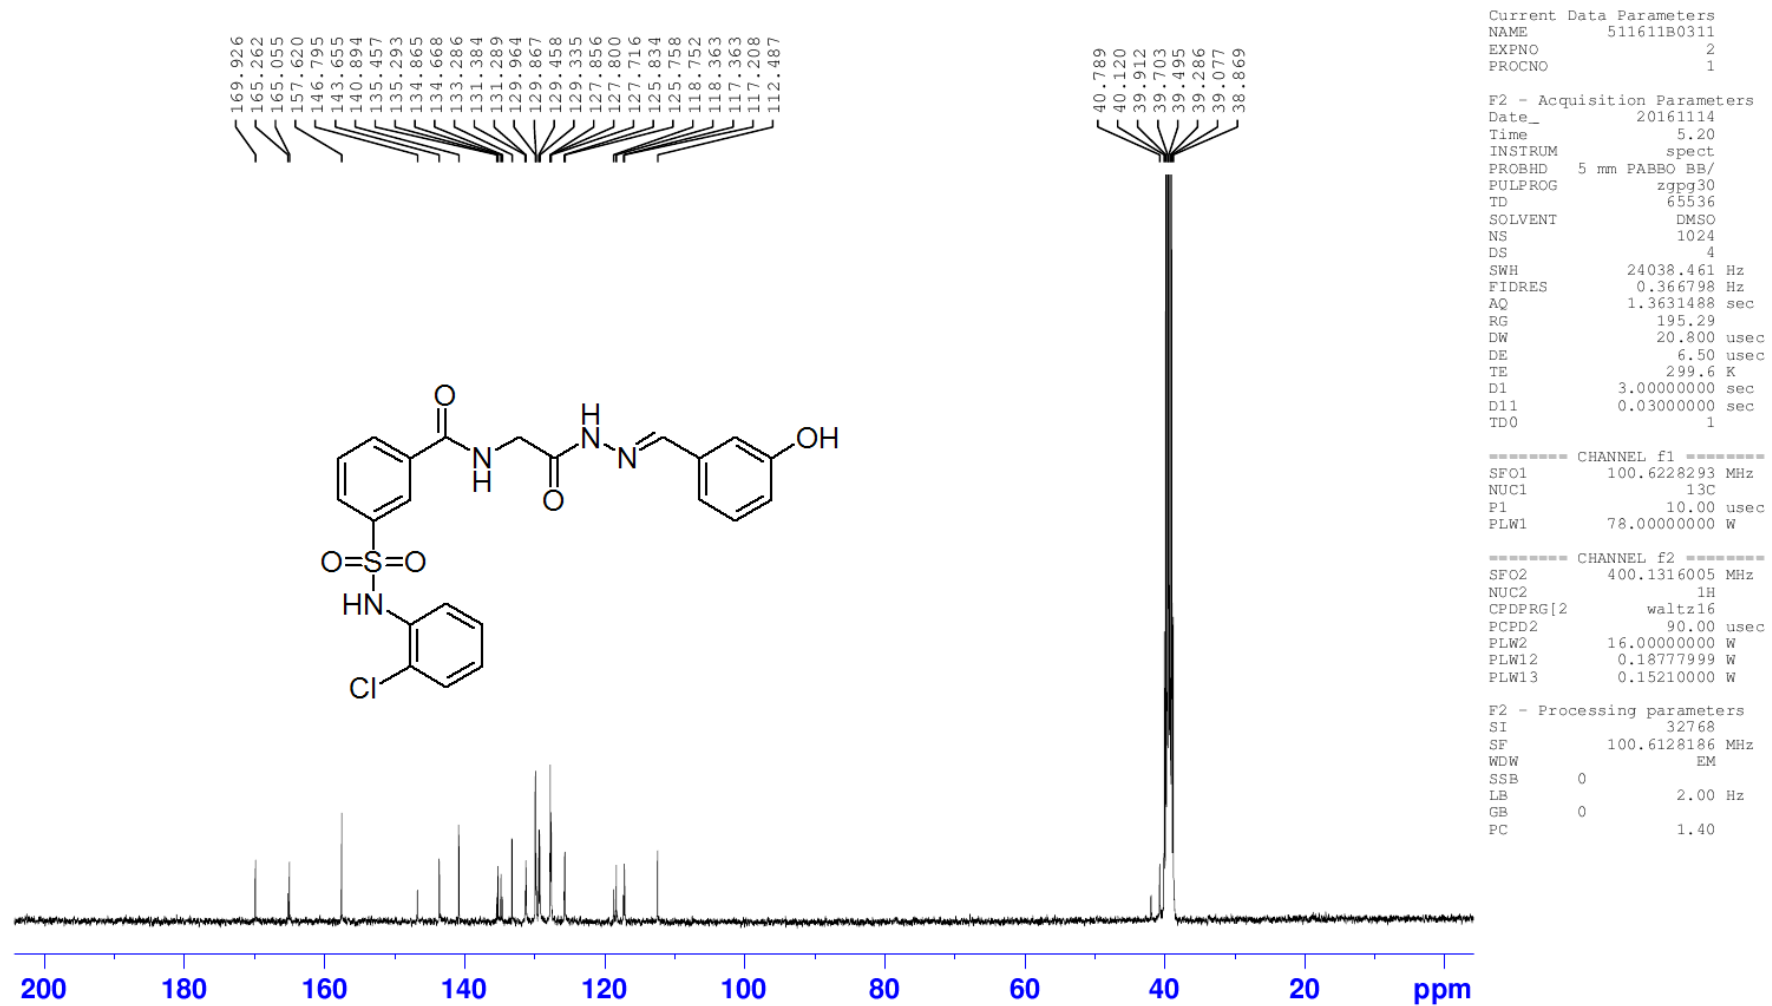

<sup>13</sup>CNMR of **Compound-1g** in DMSO-*d*<sub>6</sub>



## Elemental Composition Report

Page 1

### Single Mass Analysis

Tolerance = 10000.0 PPM / DBE: min = -1.5, max = 50.0

Selected filters: None

Monoisotopic Mass, Even Electron Ions

106 formula(e) evaluated with 2 results within limits (up to 1 closest results for each mass)

Elements Used:

C: 0-23 H: 0-20 N: 0-4 O: 0-5 S: 0-1 Cl: 0-1

GVB-SA08

511611B4322 23 (0.341) AM (Top,4, Ar,5000.0,195.18,1.00,LS 10); Sm (Mn, 2x1.00); Sb (1,40.00)

1: TOF MS ES+  
2.85e3

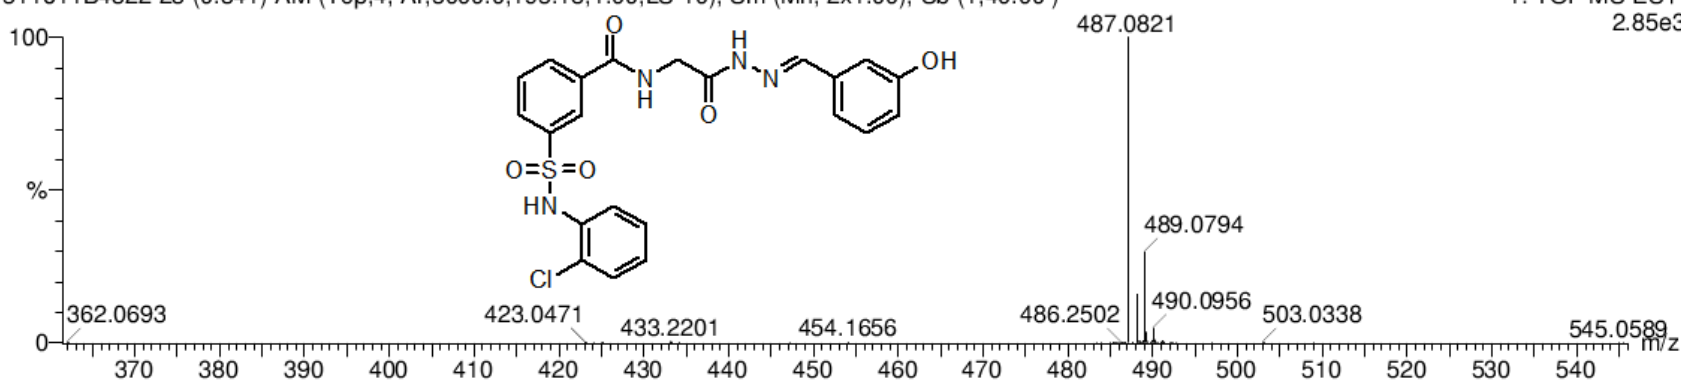

Minimum: -1.5  
Maximum: 5.0 10000.0 50.0

| Mass     | Calc. Mass | mDa  | PPM  | DBE  | i-FIT    | Formula                                                            |
|----------|------------|------|------|------|----------|--------------------------------------------------------------------|
| 487.0821 | 487.0843   | -2.2 | -4.5 | 14.5 | 168119.6 | C <sub>22</sub> H <sub>20</sub> N <sub>4</sub> O <sub>5</sub> S Cl |

### HRMS of Compound-1g

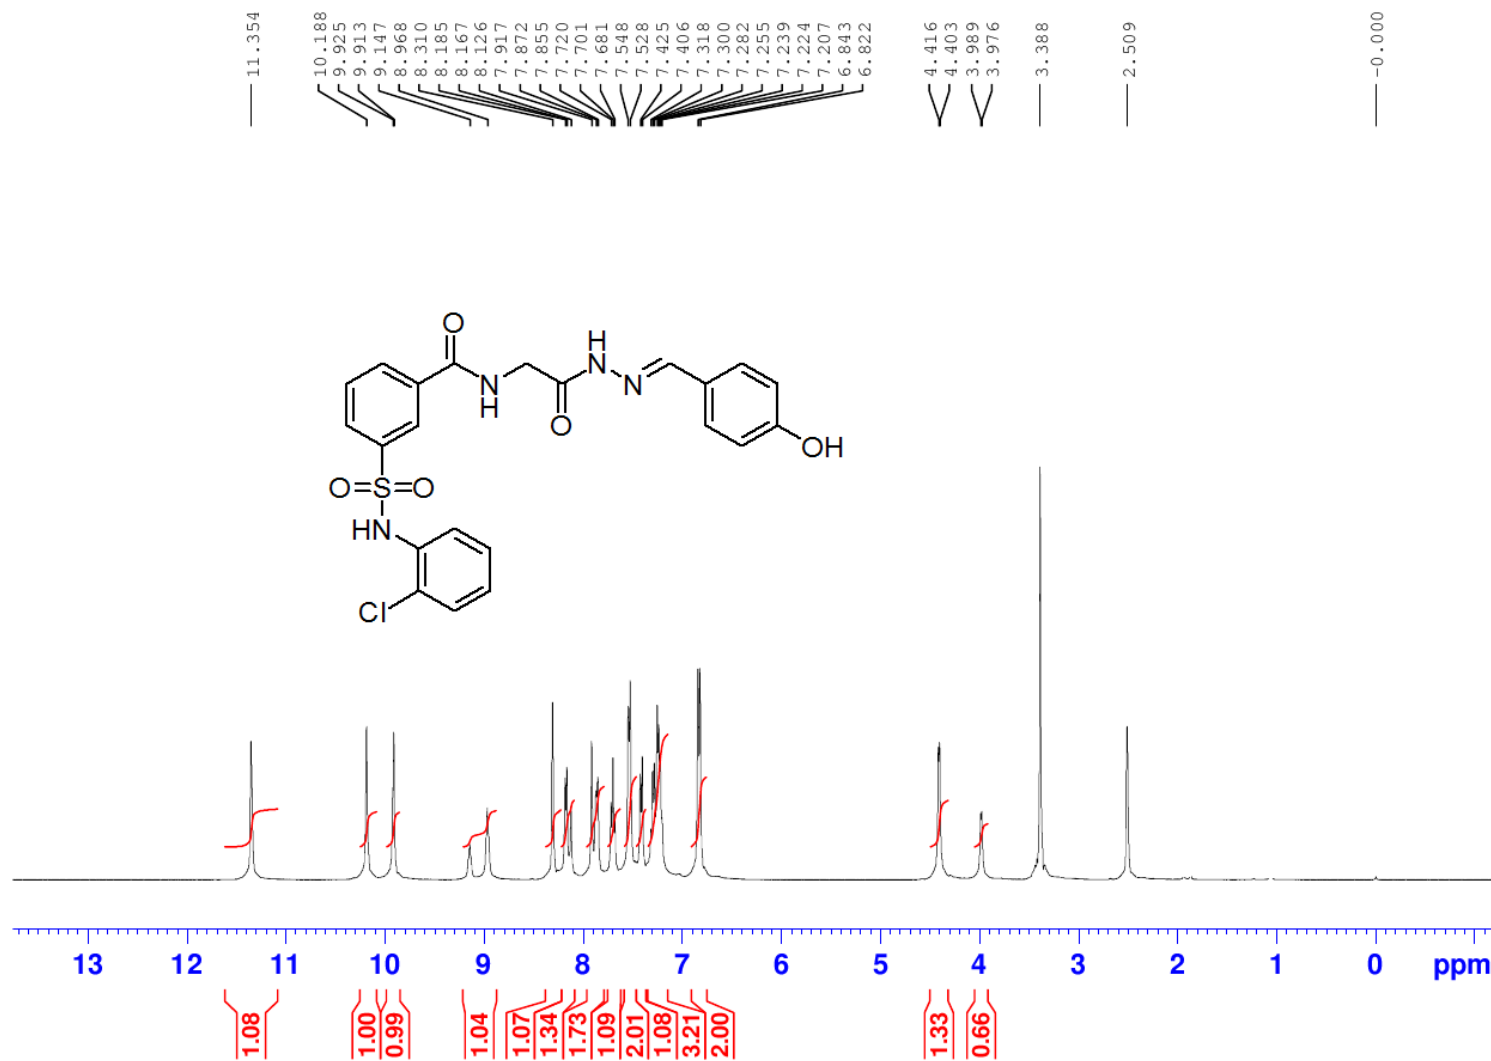

Current Data Parameters  
NAME 511611B0312  
EXPNO 1  
PROCNO 1

F2 - Acquisition Parameters  
Date\_ 20161112  
Time 12.14  
INSTRUM spect  
PROBHD 5 mm PABBO BB/  
PULPROG zg30  
TD 65536  
SOLVENT DMSO  
NS 16  
DS 2  
SWH 8012.820 Hz  
FIDRES 0.122266 Hz  
AQ 4.0894465 sec  
RG 55.04  
DW 62.400 usec  
DE 6.50 usec  
TE 298.2 K  
D1 1.00000000 sec  
TD0 1

===== CHANNEL f1 =====  
SFO1 400.1324710 MHz  
NUC1 1H  
P1 9.75 usec  
PLW1 16.00000000 W

F2 - Processing parameters  
SI 65536  
SF 400.1299991 MHz  
WDW EM  
SSB 0  
LB 0.30 Hz  
GB 0  
PC 1.00

ANL-MCL5-NMR-001

<sup>1</sup>H NMR of **Compound-1h** in DMSO-d<sub>6</sub>

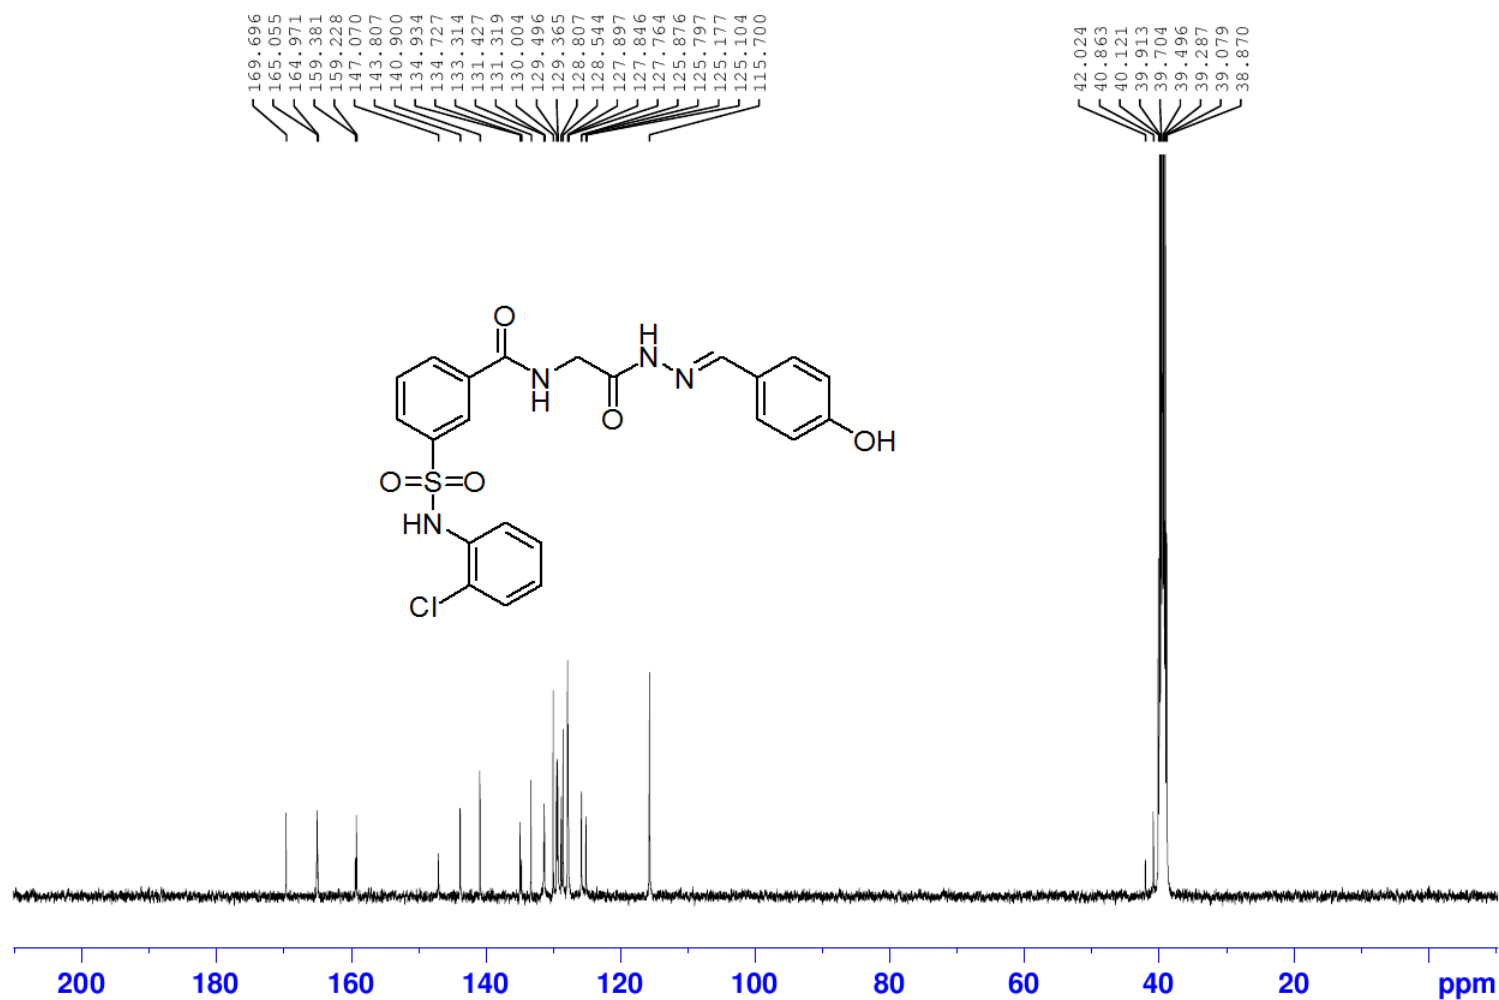

Current Data Parameters  
 NAME 511611B0312  
 EXPNO 2  
 PROCNO 1

F2 - Acquisition Parameters  
 Date\_ 20161112  
 Time 12.28  
 INSTRUM spect  
 PROBHD 5 mm PABBO BB/  
 PULPROG zgpg30  
 TD 65536  
 SOLVENT DMSO  
 NS 686  
 DS 4  
 SWH 24038.461 Hz  
 FIDRES 0.366798 Hz  
 AQ 1.3631488 sec  
 RG 195.29  
 DW 20.800 usec  
 DE 6.50 usec  
 TE 298.2 K  
 D1 3.00000000 sec  
 D11 0.03000000 sec  
 TD0 1

===== CHANNEL f1 =====  
 SFO1 100.6228293 MHz  
 NUC1 13C  
 P1 10.00 usec  
 PLW1 78.00000000 W

===== CHANNEL f2 =====  
 SFO2 400.1316005 MHz  
 NUC2 1H  
 CPDPRG[2] waltz16  
 PCPD2 90.00 usec  
 PLW2 16.00000000 W  
 PLW12 0.18777999 W  
 PLW13 0.15210000 W

F2 - Processing parameters  
 SI 32768  
 SF 100.6128146 MHz  
 WDW EM  
 SSB 0  
 LB 2.00 Hz  
 GB 0  
 PC 1.40

ANL-MCL5-NMR-001

<sup>13</sup>CNMR of **Compound-1h** in DMSO-*d*<sub>6</sub>

## Elemental Composition Report

Page 1

### Single Mass Analysis

Tolerance = 10000.0 PPM / DBE: min = -1.5, max = 50.0

Selected filters: None

Monoisotopic Mass, Even Electron Ions

106 formula(e) evaluated with 2 results within limits (up to 1 closest results for each mass)

Elements Used:

C: 0-23 H: 0-20 N: 0-4 O: 0-5 S: 0-1 Cl: 0-1

GVB-SA09

511611B4323 21 (0.287) AM (Top,4, Ar,5000.0,195.16,1.00,LS 10); Sm (Mn, 2x1.00); Sb (1,40.00); Cm (15:22)

1: TOF MS ES+  
1.75e3

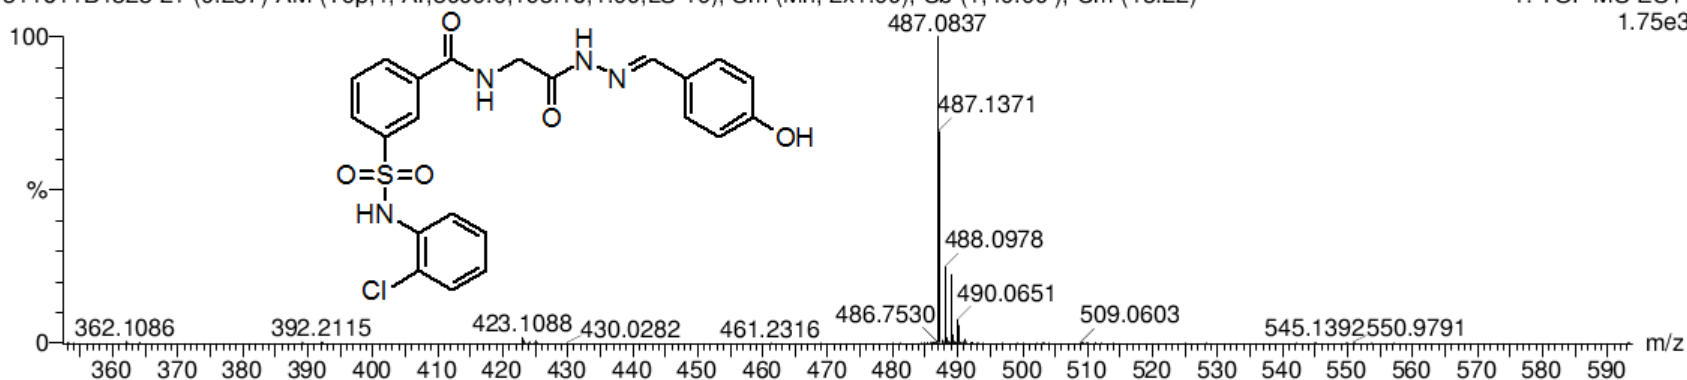

Minimum: -1.5  
Maximum: 5.0 10000.0 50.0

| Mass     | Calc. Mass | mDa  | PPM  | DBE  | i-FIT    | Formula            |
|----------|------------|------|------|------|----------|--------------------|
| 487.0837 | 487.0843   | -0.6 | -1.2 | 14.5 | 102982.1 | C22 H20 N4 O5 S Cl |

HRMS of Compound-1h

GVB-SA-21  
 Reference Code: 511611B2478  
 Solvent: dmso  
 Archive directory:  
 /home/gvkbio/data/2016/Nov  
 Agilent 400-MRDD2  
 Data collected on: Nov 18 2016  
 Experiment: PROTON

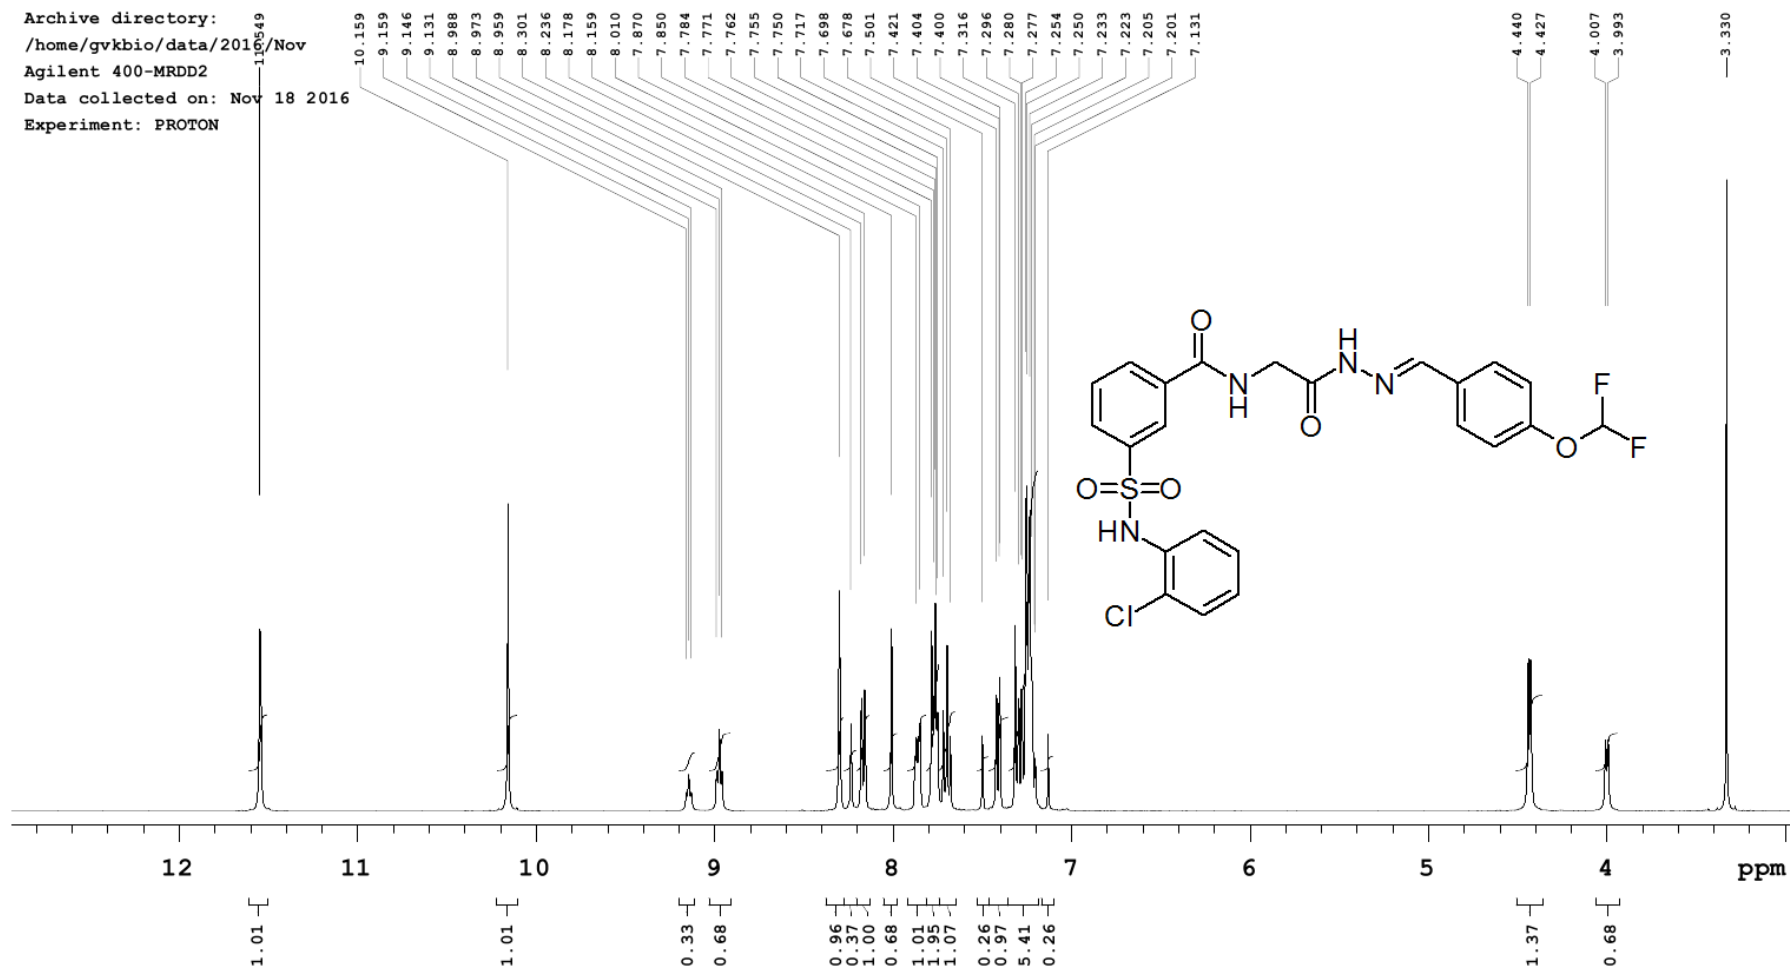

<sup>1</sup>H NMR of **Compound-1i** in DMSO-d<sub>6</sub>

GVB-SA-21

Reference Code: 511611B2478

Solvent: dms

Archive directory:  
/home/gvkbio/data/2016/Nov

Agilent 400-MRBD

Data collected on: Nov 18 2016

Experiment: CARBON

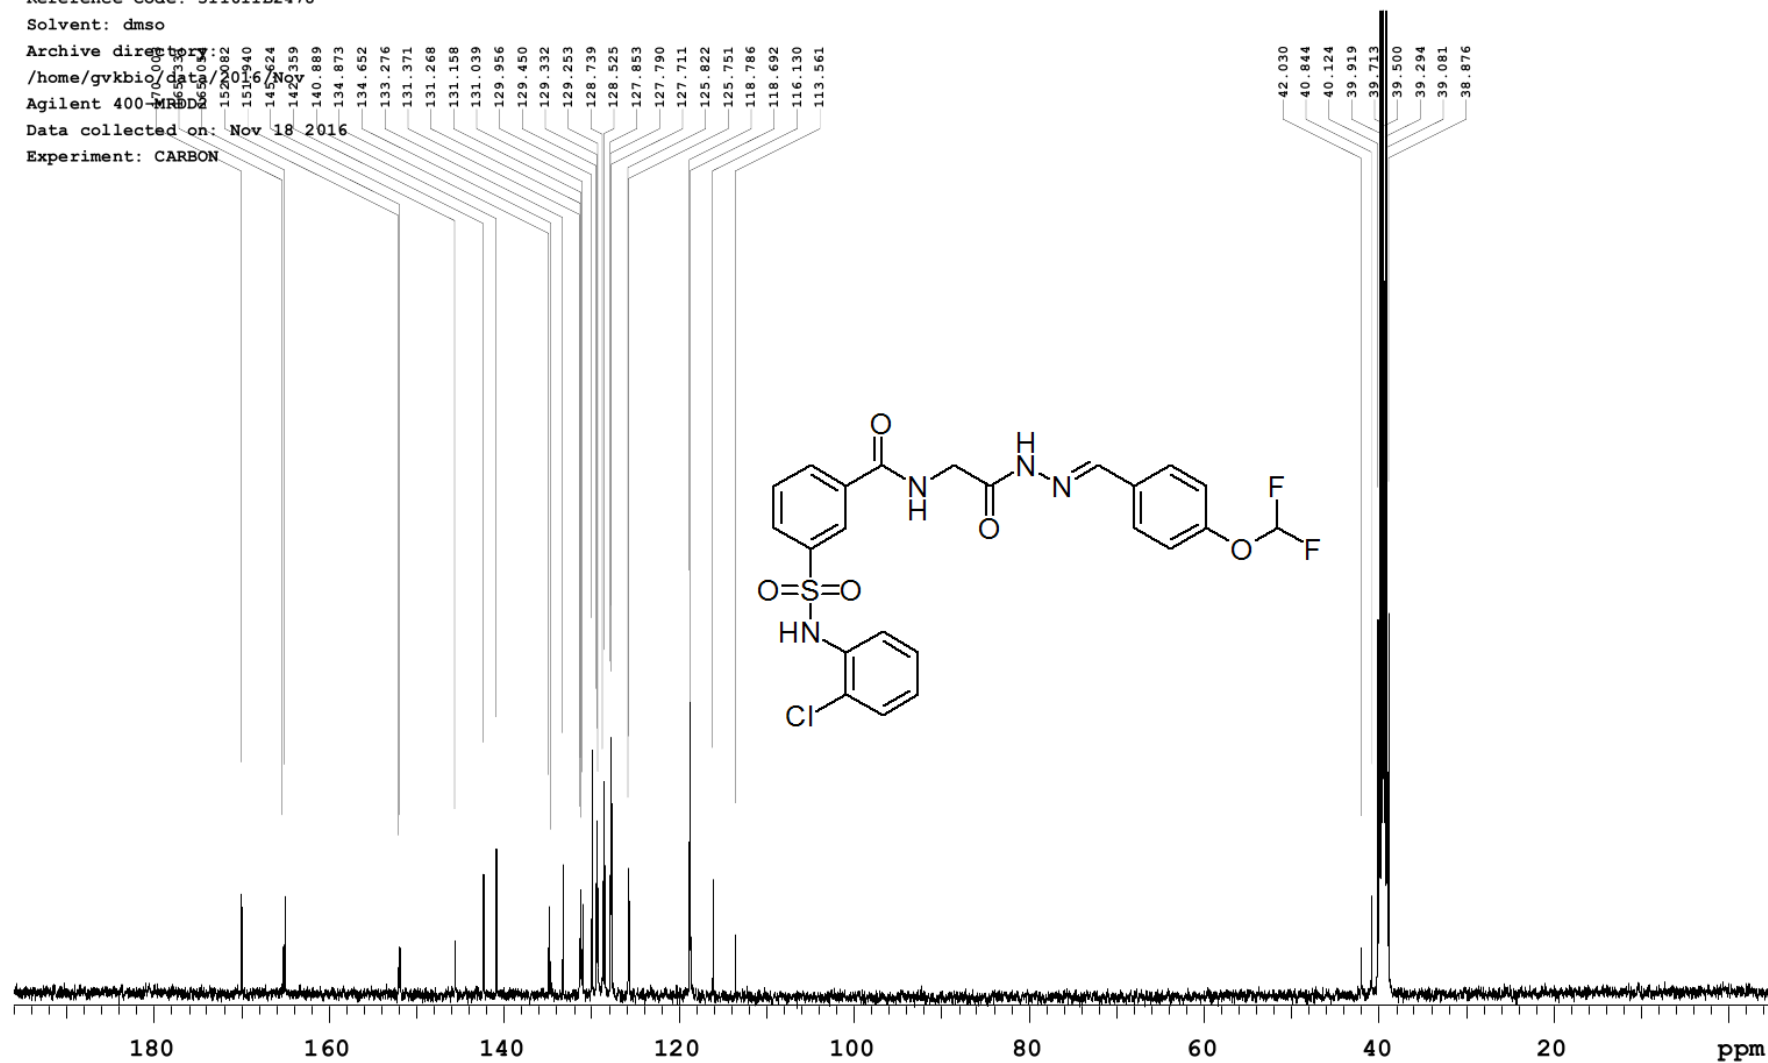

$^{13}\text{C}$ NMR of Compound-1i in DMSO- $\text{d}_6$

## Elemental Composition Report

Page 1

### Single Mass Analysis

Tolerance = 1000.0 PPM / DBE: min = -1.5, max = 50.0

Selected filters: None

Monoisotopic Mass, Even Electron Ions

335 formula(e) evaluated with 2 results within limits (up to 1 best isotopic matches for each mass)

Elements Used:

C: 0-24 H: 0-20 N: 0-4 O: 0-5 S: 0-1 Cl: 0-1 F: 0-2

GVB-SA21

511611B8172 9 (0.136) AM (Top,4, Ar,5000.0,195.18,1.00,LS 10); Sm (Mn, 2x1.00); Sb (1,40.00)

1: TOF MS ES+  
2.02e3

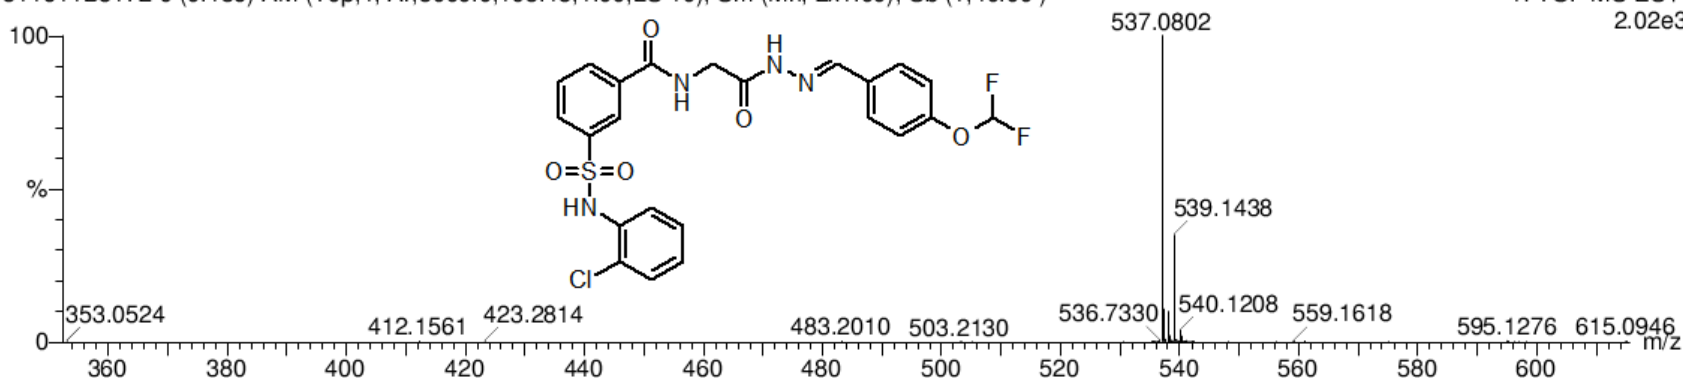

Minimum: -1.5  
Maximum: 5.0 1000.0 50.0

| Mass     | Calc. Mass | mDa  | PPM  | DBE  | i-FIT | Formula               |
|----------|------------|------|------|------|-------|-----------------------|
| 537.0802 | 537.0811   | -0.9 | -1.7 | 14.5 | 232.2 | C23 H20 N4 O5 S Cl F2 |

HRMS of Compound-1i

GVB-SA-19  
 Reference Code: 511611B2475  
 Solvent: dmsc  
 Archive directory:  
 /home/gvkbio/data/2016/Nov  
 Agilent 400-MRDD2  
 Data collected on: Nov 18 2016  
 Experiment: PROTON

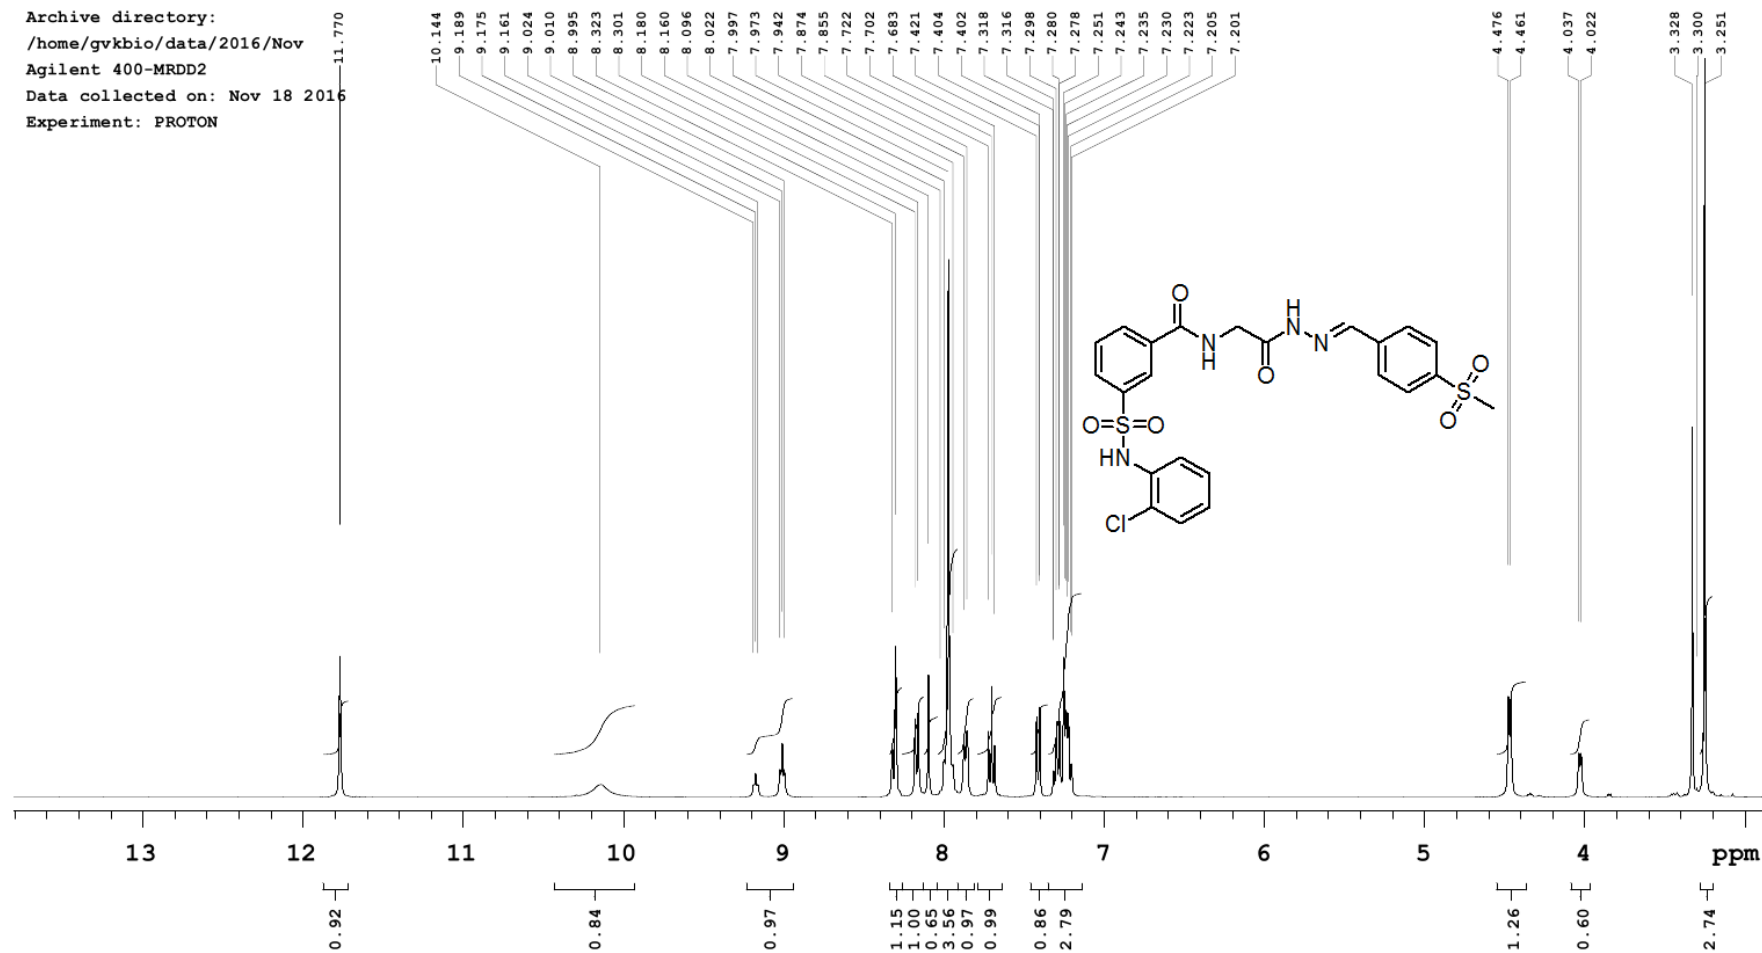

<sup>1</sup>H NMR of Compound-1j in DMSO-d<sub>6</sub>



GVB-SA-19

Reference Code: 511611B2475

Solvent: dmsc

Archive directory

/home/gvkbio/data/2016/Nov

Agilent 400-MRBD

Data collected on: Nov 18 2016

Experiment: CARBON

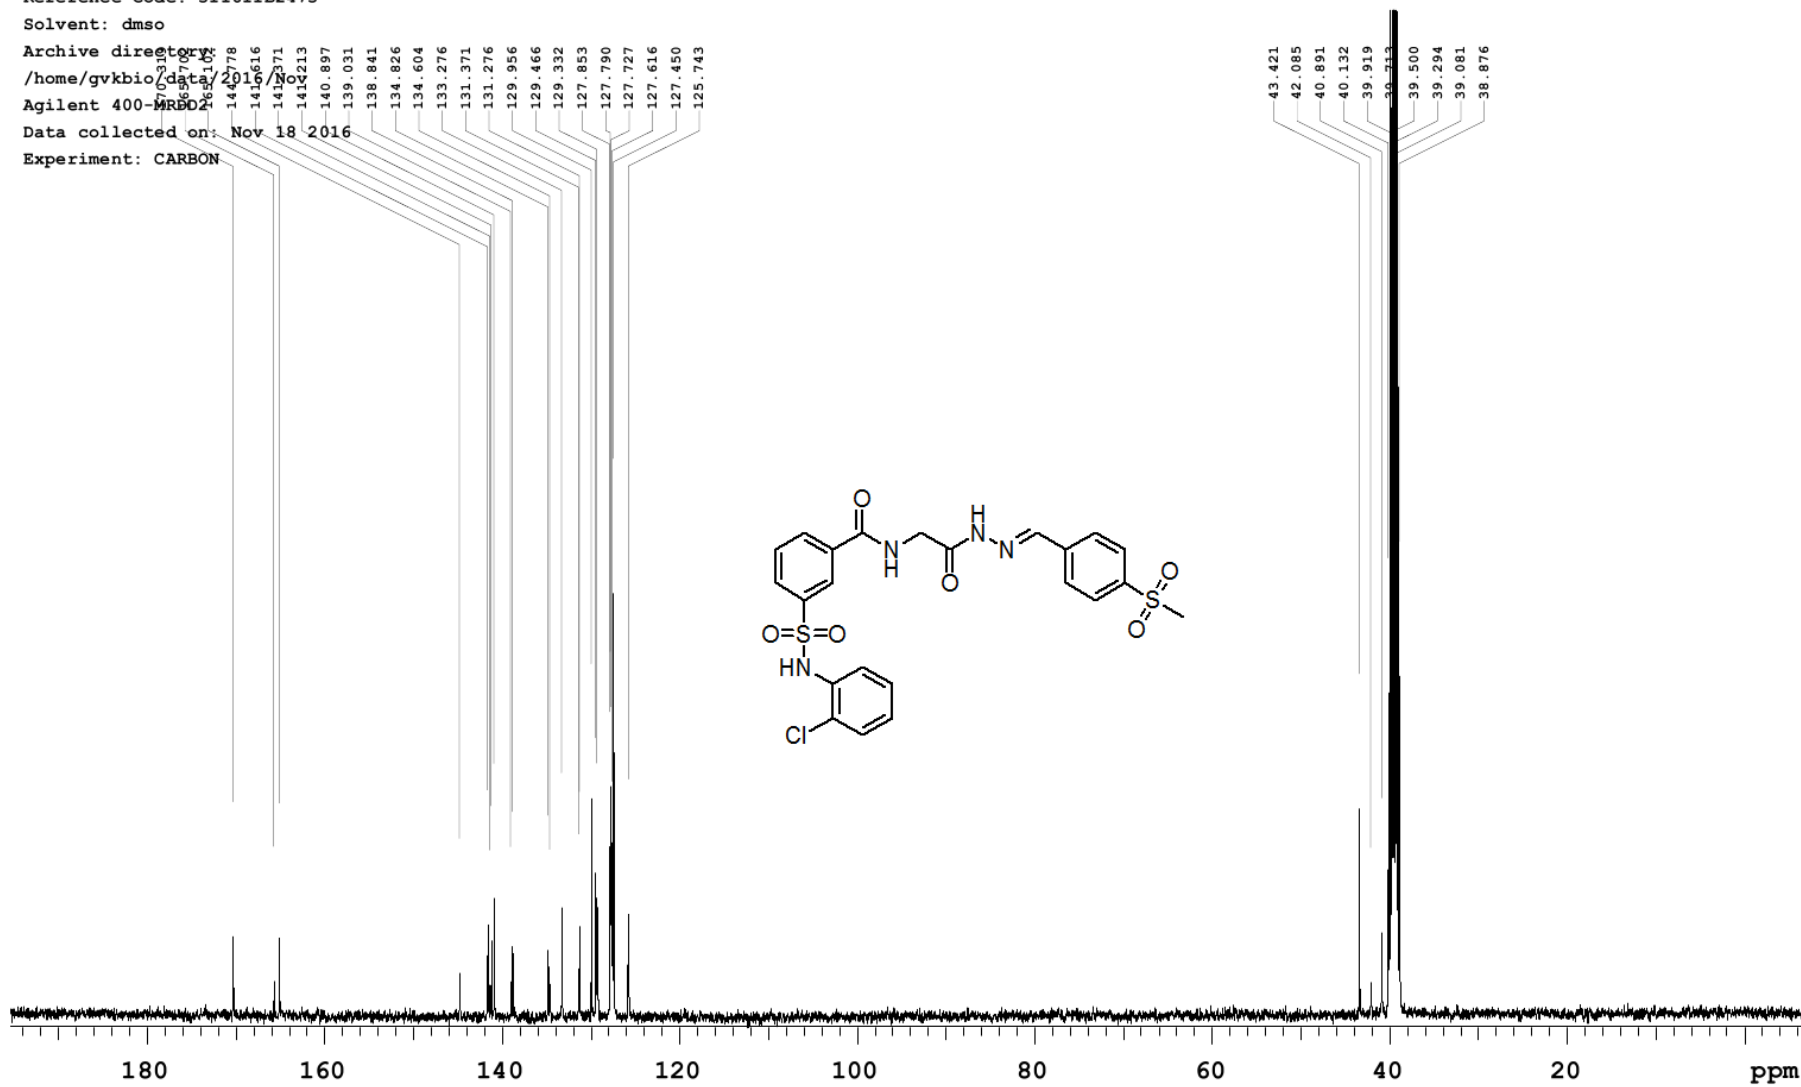

<sup>13</sup>CNMR of Compound-1j in DMSO-d<sub>6</sub>

## Elemental Composition Report

Page 1

### Single Mass Analysis

Tolerance = 1000.0 PPM / DBE: min = -1.5, max = 50.0

Selected filters: None

Monoisotopic Mass, Even Electron Ions

203 formula(e) evaluated with 1 results within limits (up to 1 best isotopic matches for each mass)

Elements Used:

C: 0-23 H: 0-22 N: 0-4 O: 0-6 S: 0-2 Cl: 0-1

GVB-SA19

511611B8169 56 (0.800) AM (Top,4, Ar,5000.0,195.15,1.00,LS 10); Sm (Mn, 2x1.00); Sb (1,40.00); Cm (28:56)

1: TOF MS ES+  
393

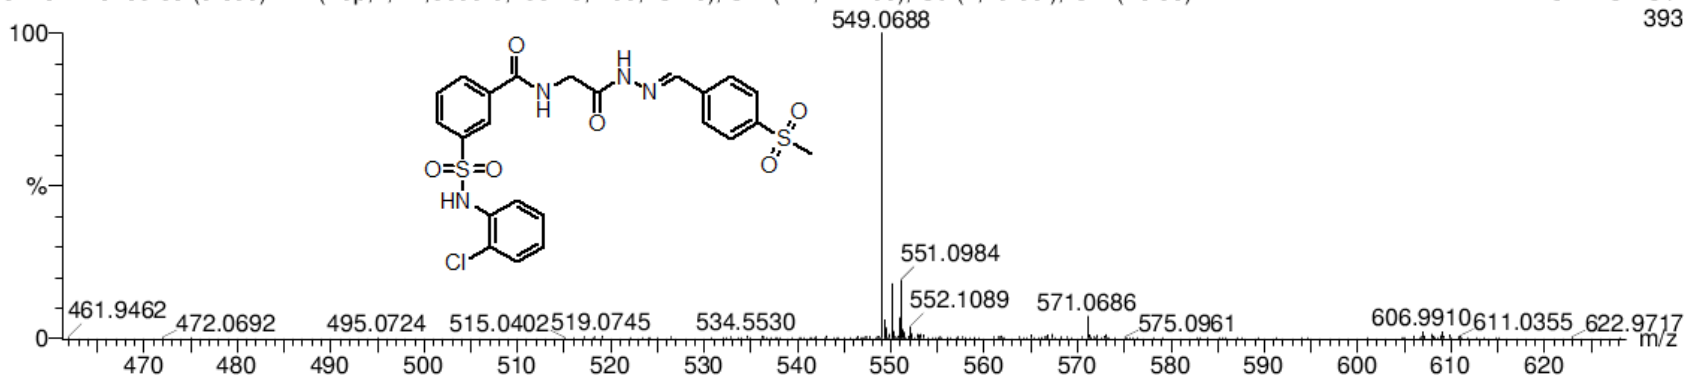

Minimum: -1.5  
Maximum: 5.0 1000.0 50.0

| Mass     | Calc. Mass | mDa | PPM | DBE  | i-FIT | Formula             |
|----------|------------|-----|-----|------|-------|---------------------|
| 549.0688 | 549.0669   | 1.9 | 3.5 | 14.5 | 37.2  | C23 H22 N4 O6 S2 Cl |

HRMS of Compound-1j

Experiment: PROTON

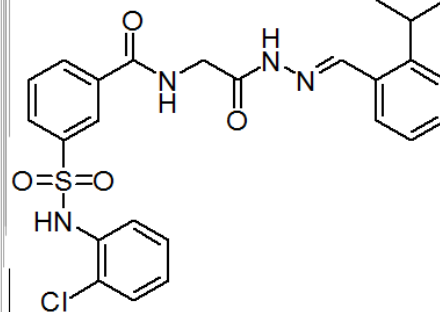

GVB-SA22

Reference Code: 511611C0227

Solvent: dms

Archive directory

/home/gvbio/data/2016/Nov

Agilent 400-MRDS

Data collected on: Nov 27 2016

Experiment: CARBON

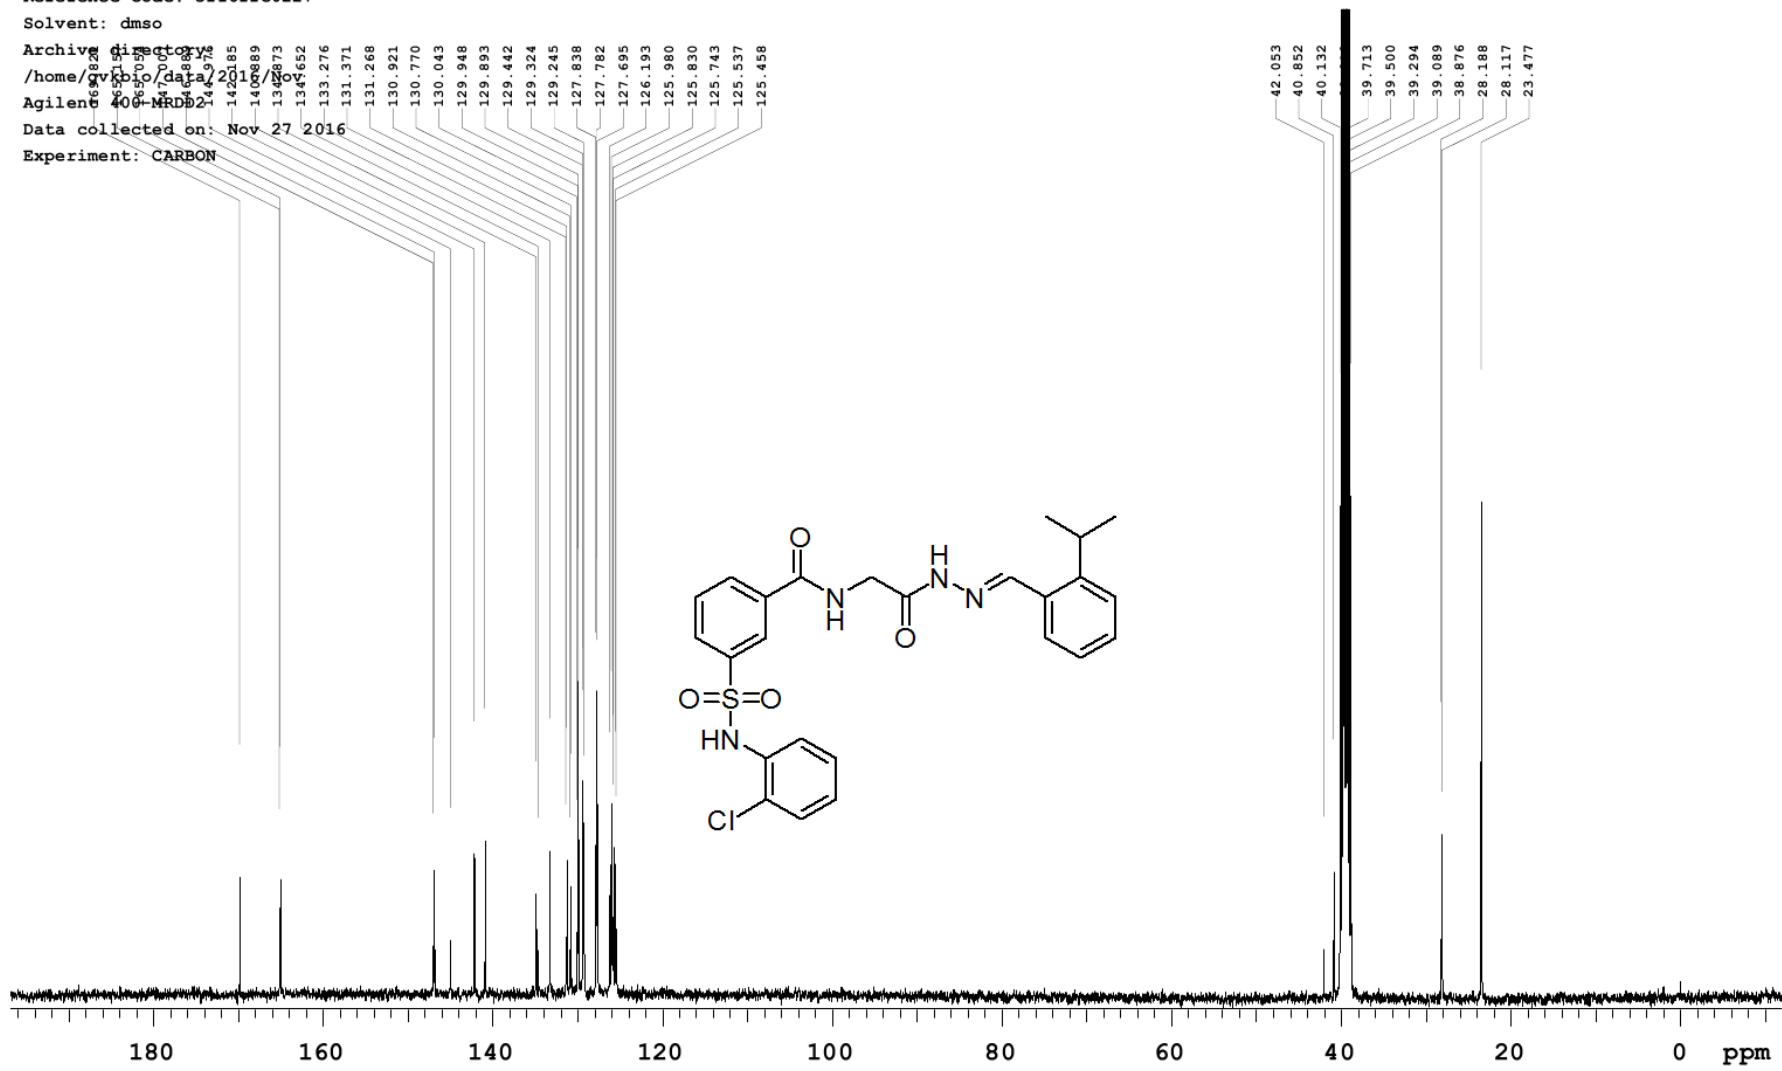

$^{13}\text{C}$ NMR of **Compound-1k** in  $\text{DMSO-d}_6$

## Elemental Composition Report

Page 1

### Single Mass Analysis

Tolerance = 1000.0 PPM / DBE: min = -1.5, max = 50.0

Selected filters: None

Monoisotopic Mass, Even Electron Ions

93 formula(e) evaluated with 1 results within limits (up to 1 best isotopic matches for each mass)

Elements Used:

C: 0-25 H: 0-26 N: 0-4 O: 0-4 S: 0-1 Cl: 0-1

GVB-SA22

511611B8551 8 (0.127) AM (Top,4, Ar,5000.0,195.16,1.00,LS 10); Sm (Mn, 2x1.00); Sb (1,40.00)

1: TOF MS ES+  
4.75e3

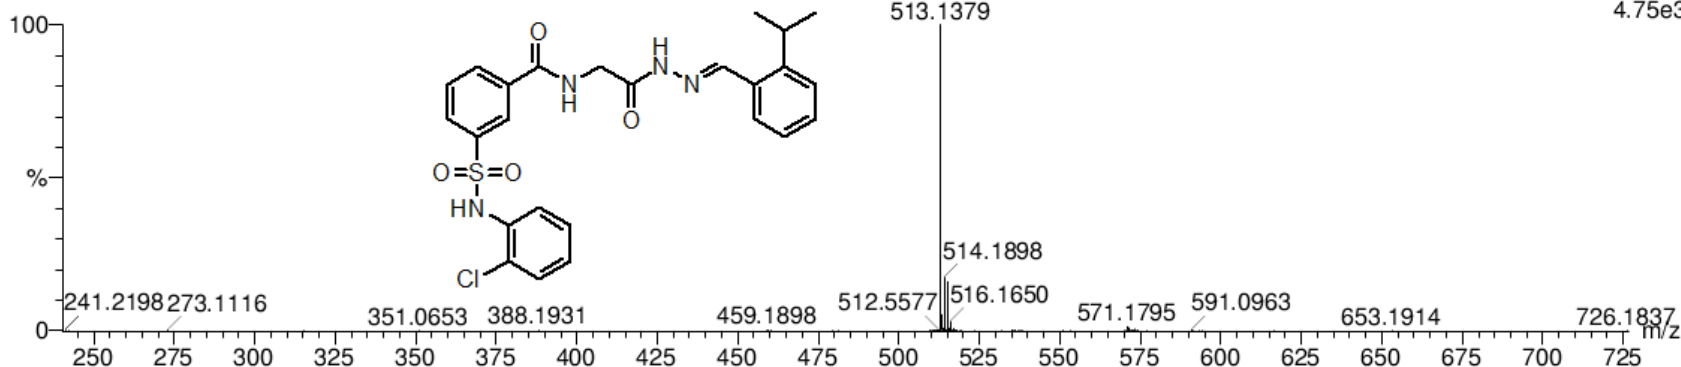

Minimum: -1.5  
Maximum: 5.0 1000.0 50.0

| Mass     | Calc. Mass | mDa | PPM | DBE  | i-FIT | Formula                                                            |
|----------|------------|-----|-----|------|-------|--------------------------------------------------------------------|
| 513.1379 | 513.1363   | 1.6 | 3.1 | 14.5 | 525.4 | C <sub>25</sub> H <sub>26</sub> N <sub>4</sub> O <sub>4</sub> S Cl |

HRMS of Compound-1k

GVB-SA-20  
 Reference Code: 511611B2476  
 Solvent: dmso  
 Archive directory:  
 /home/gvkbio/data/2016/Nov  
 Agilent 400-MRDD2  
 Data collected on: Nov 18 2016  
 Experiment: PROTON

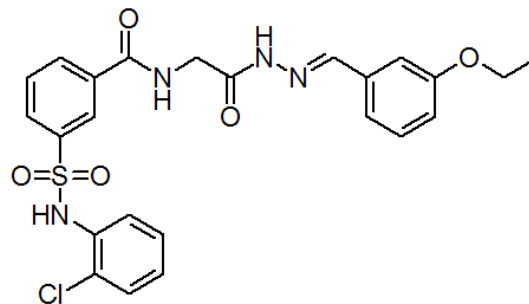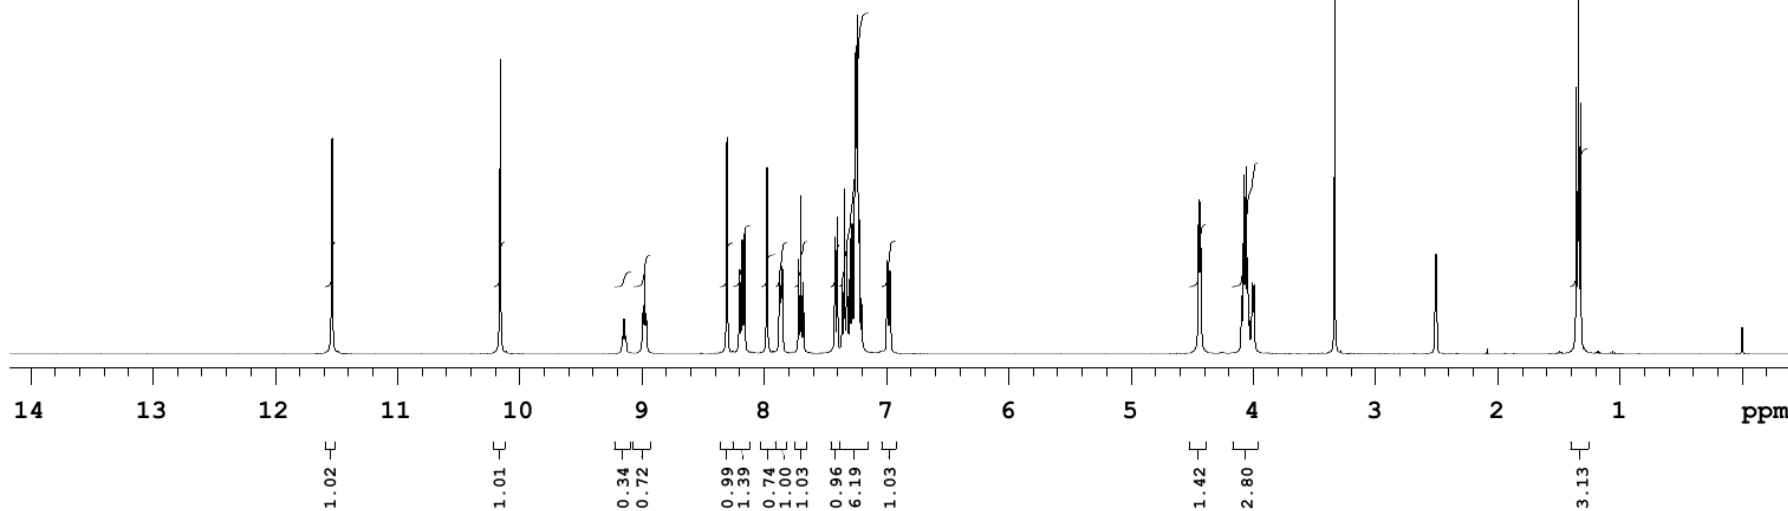

<sup>1</sup>H NMR of **Compound-11** in DMSO-d<sub>6</sub>

GVB-SA-20

Reference Code: 511611B2476

Solvent: dmso

Archive directory

/home/gvkbio/data/2016/

Agilent 400-MRDS2

Data collected on: Nov 18 2016

Experiment: CARBON

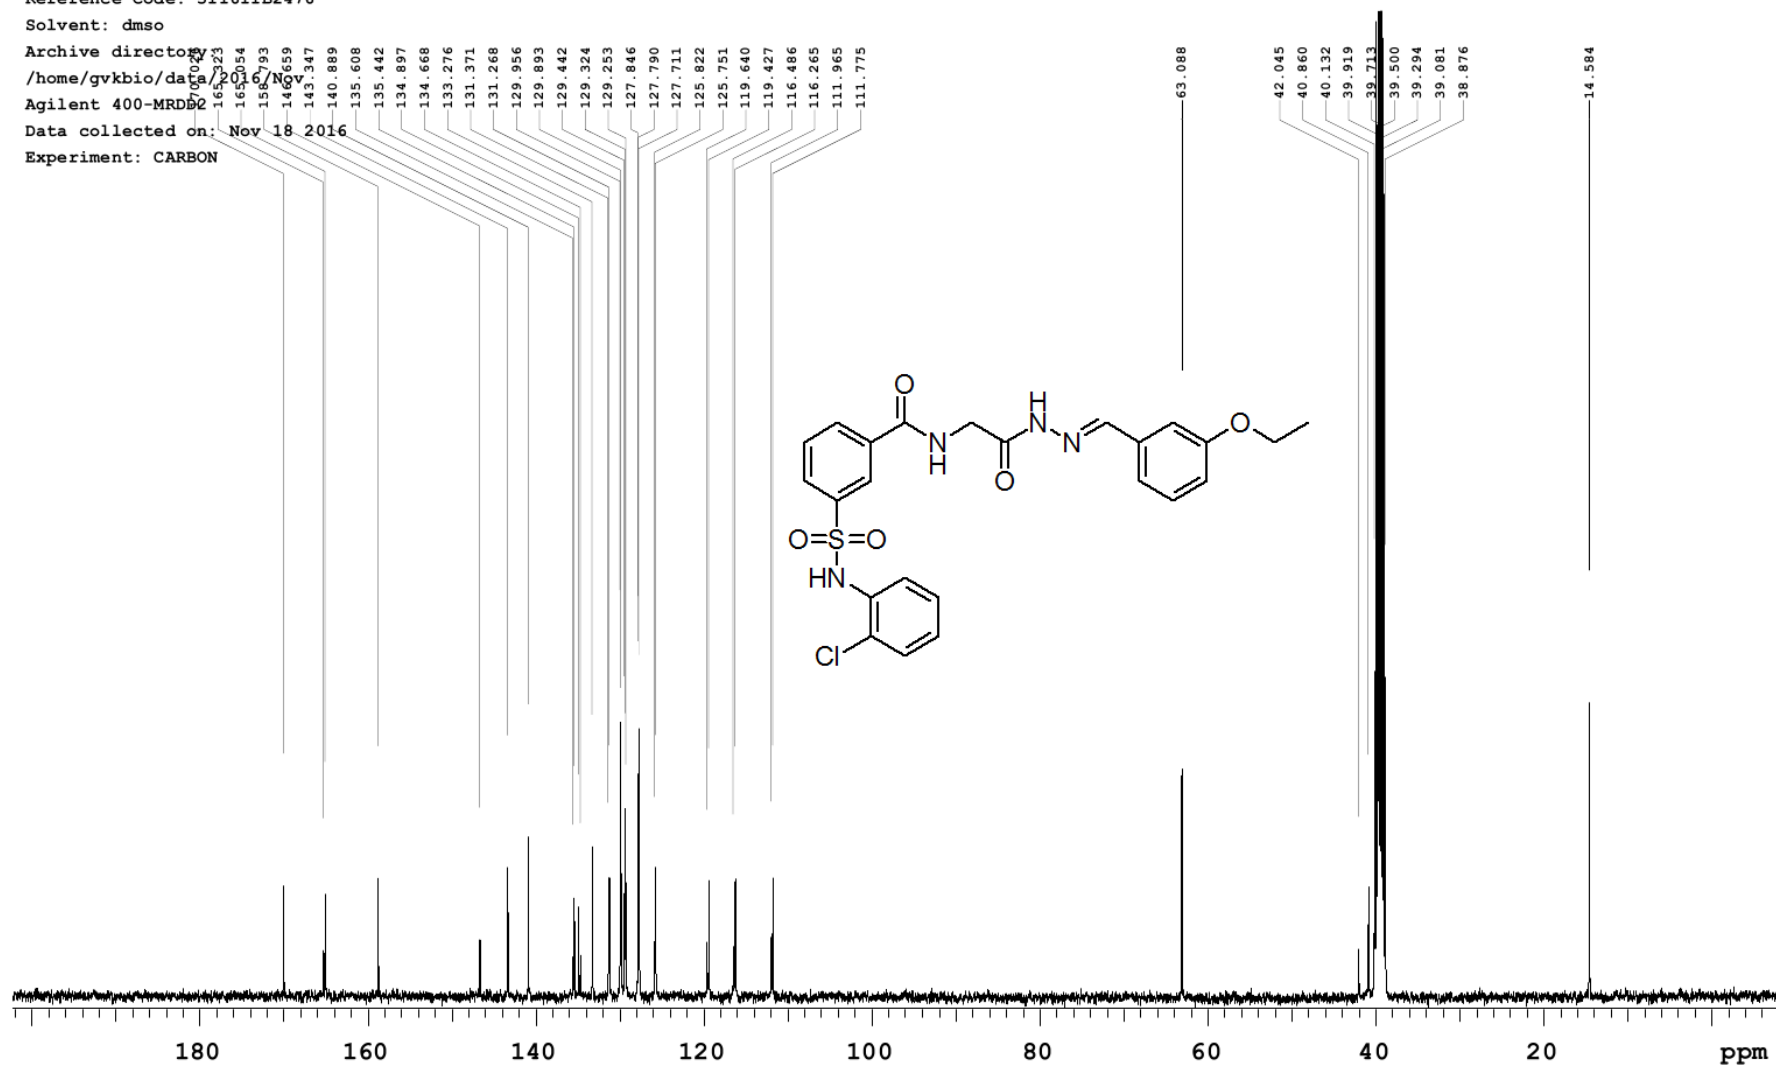

$^{13}\text{C}$ NMR of Compound-11 in DMSO- $\text{d}_6$

## Elemental Composition Report

Page 1

### Single Mass Analysis

Tolerance = 1000.0 PPM / DBE: min = -1.5, max = 50.0

Selected filters: None

Monoisotopic Mass, Even Electron Ions

161 formula(e) evaluated with 7 results within limits (up to 1 best isotopic matches for each mass)

Elements Used:

C: 0-24 H: 0-24 N: 0-4 O: 0-5 S: 0-2 Cl: 0-1

GVB-SA20

511611B8171 8 (0.126) AM (Top,4, Ar,5000.0,195.16,1.00,LS 10); Sm (Mn, 2x1.00); Sb (1,40.00 )

1: TOF MS ES+  
4.54e3

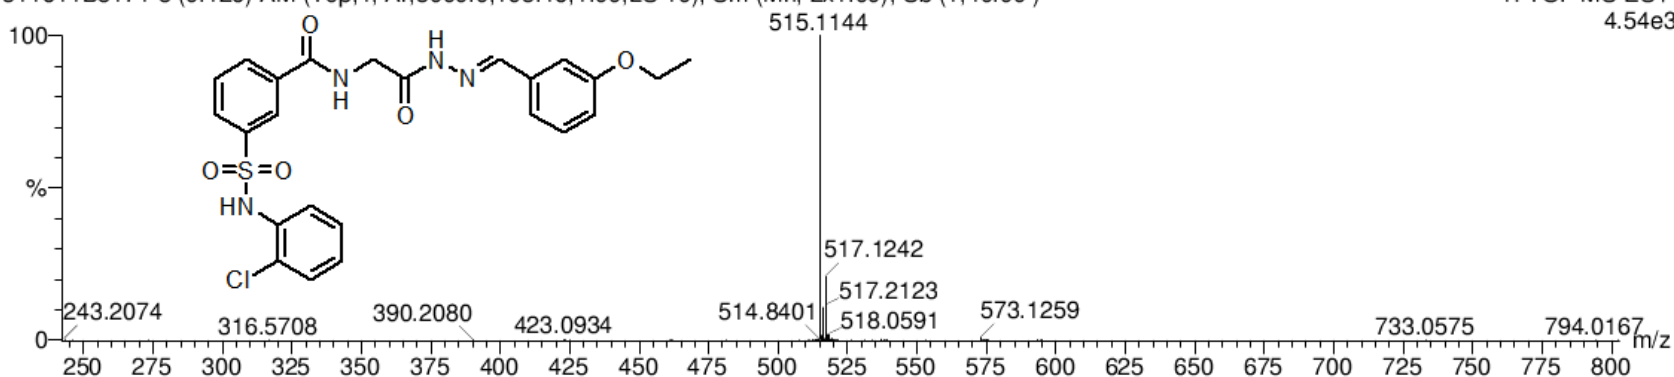

Minimum: -1.5  
Maximum: 5.0 1000.0 50.0

| Mass     | Calc. Mass | mDa  | PPM  | DBE  | i-FIT | Formula            |
|----------|------------|------|------|------|-------|--------------------|
| 515.1144 | 515.1156   | -1.2 | -2.3 | 14.5 | 481.0 | C24 H24 N4 O5 S Cl |

HRMS of Compound-11



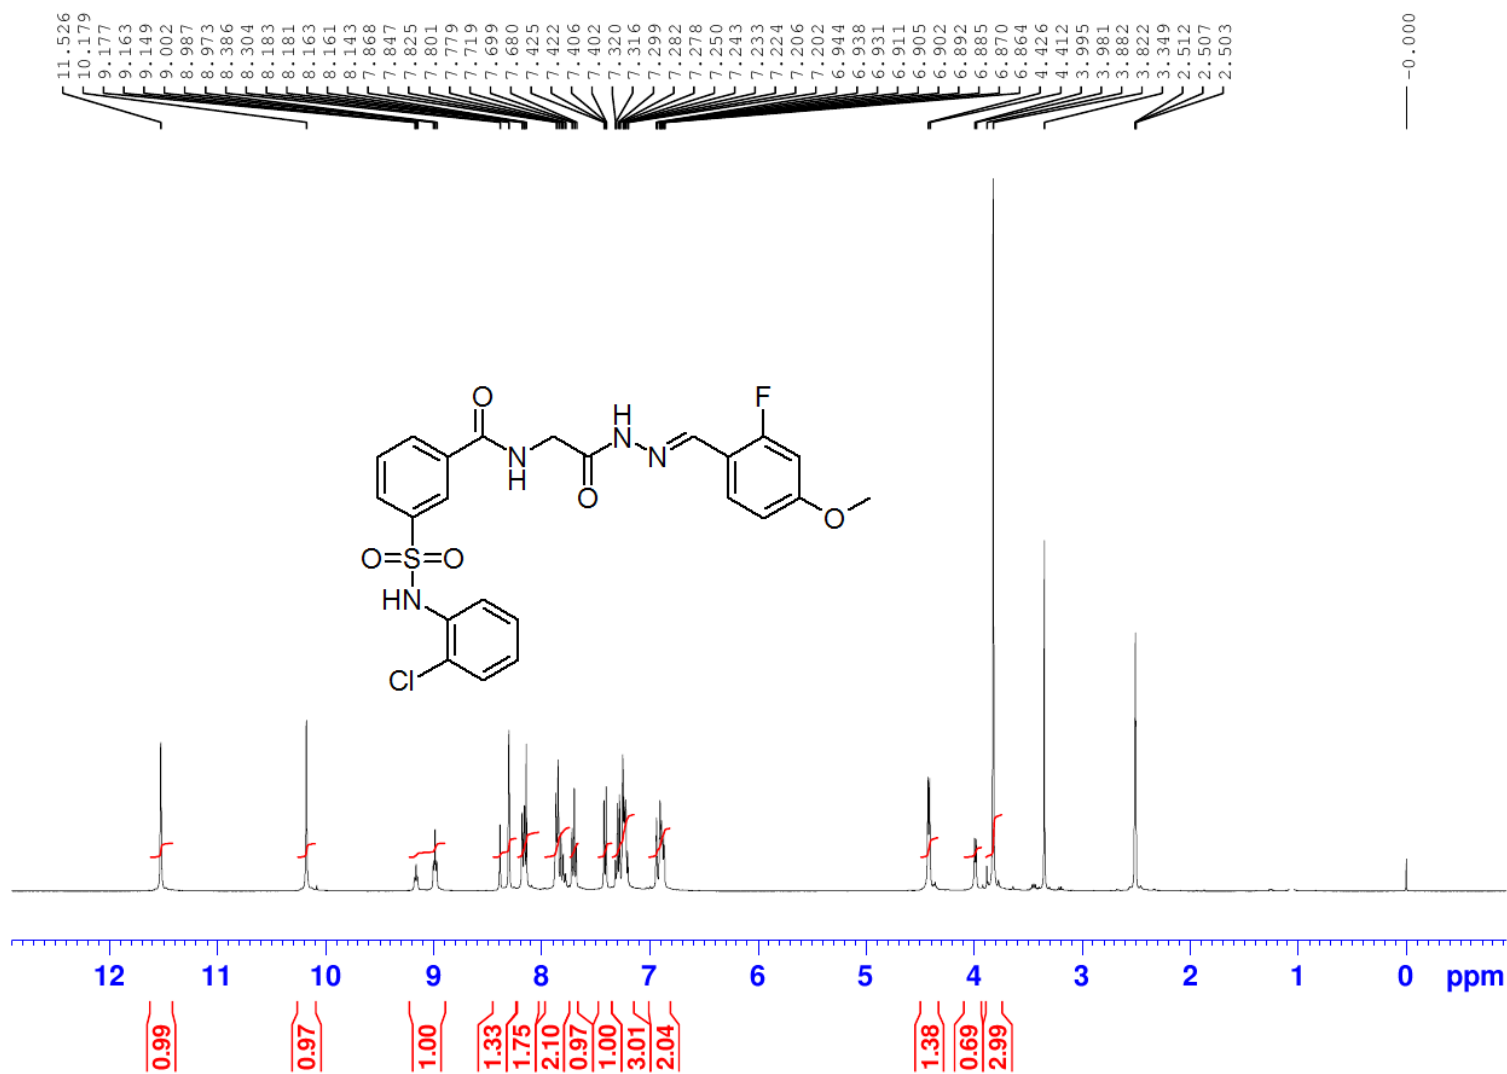

Current Data Parameters  
NAME 511611B2470  
EXPNO 1  
PROCNO 1

F2 - Acquisition Parameters  
Date\_ 20161120  
Time 18.29  
INSTRUM spect  
PROBHD 5 mm PABBO BB/  
PULPROG zg30  
TD 65536  
SOLVENT DMSO  
NS 16  
DS 2  
SWH 8012.820 Hz  
FIDRES 0.122266 Hz  
AQ 4.0894465 sec  
RG 86.08  
DW 62.400 usec  
DE 6.50 usec  
TE 359.7 K  
D1 1.00000000 sec  
TD0 1

===== CHANNEL f1 =====  
SFO1 400.1324710 MHz  
NUC1 1H  
P1 9.75 usec  
PLW1 16.00000000 W

F2 - Processing parameters  
SI 65536  
SF 400.1299999 MHz  
WDW EM  
SSB 0  
LB 0.30 Hz  
GB 0  
PC 1.00

ANL-MCL5-NMR-001

<sup>1</sup>H NMR of **Compound-1m** in DMSO-d<sub>6</sub>

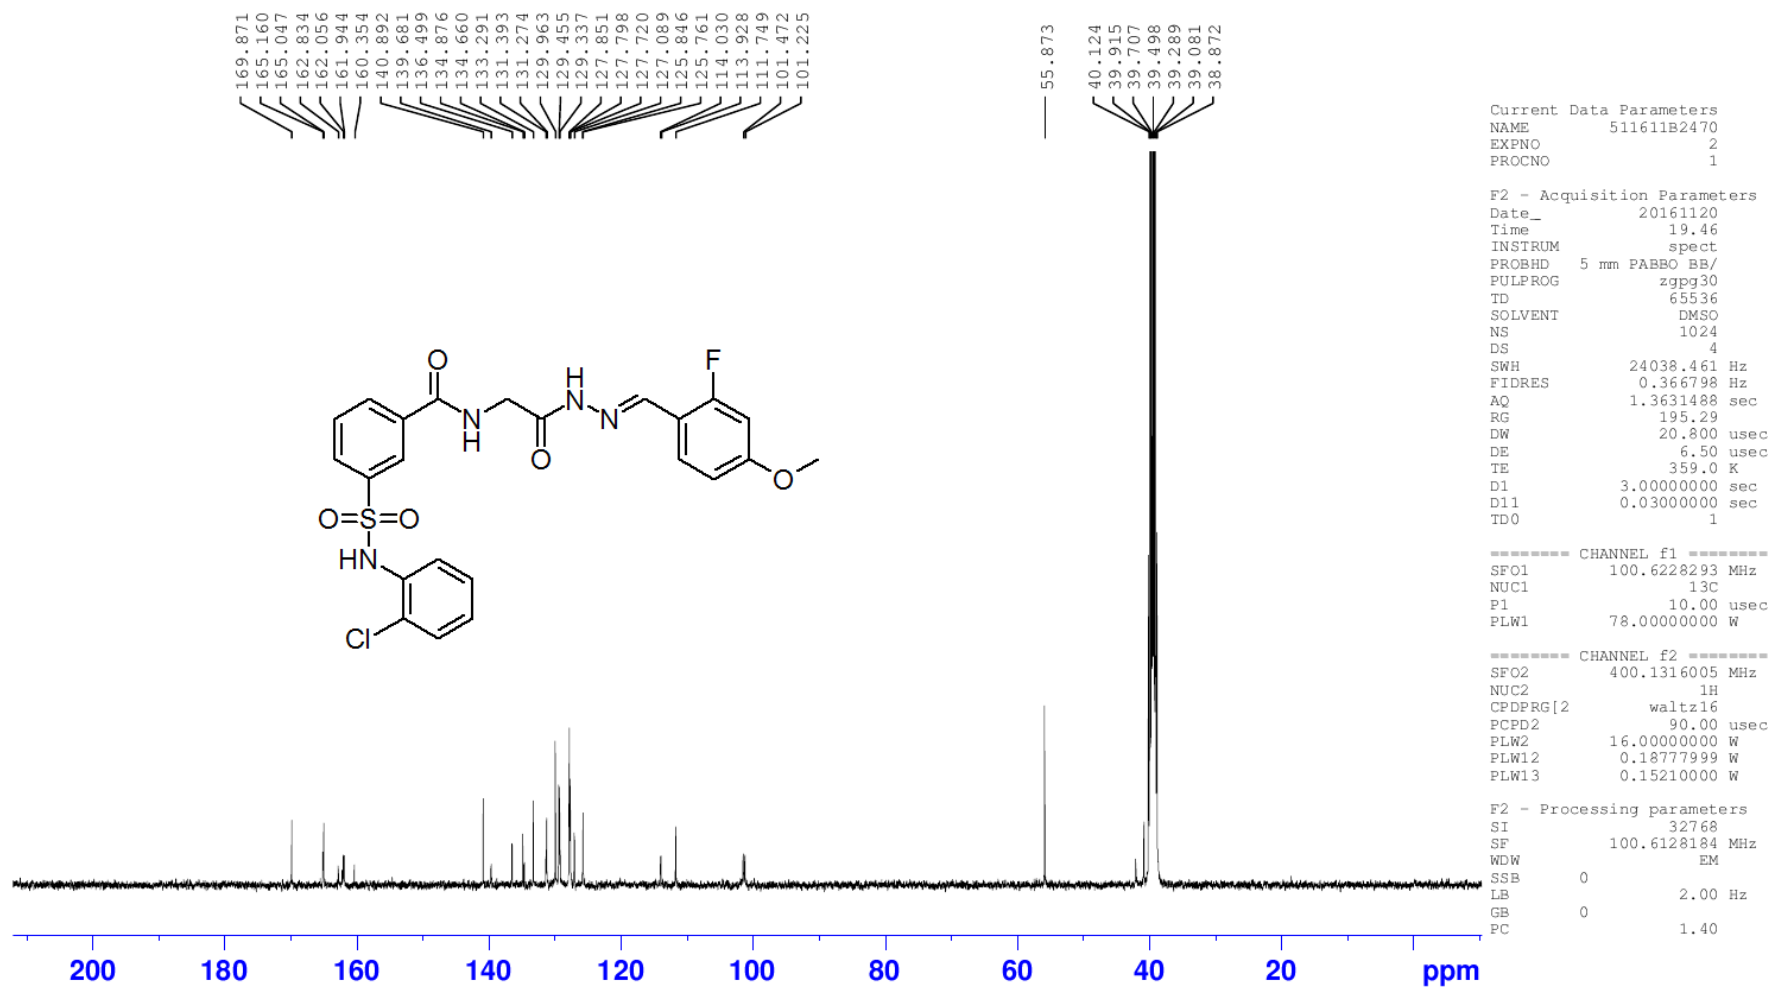

ANL-MCL5-NMR-001

$^{13}\text{C}$ NMR of **Compound-1m** in DMSO- $\text{d}_6$

## Elemental Composition Report

Page 1

### Single Mass Analysis

Tolerance = 1000.0 PPM / DBE: min = -1.5, max = 50.0

Selected filters: None

Monoisotopic Mass, Even Electron Ions

230 formula(e) evaluated with 1 results within limits (up to 1 best isotopic matches for each mass)

Elements Used:

C: 0-23 H: 0-21 N: 0-4 O: 0-5 F: 0-1 S: 0-1 Cl: 0-1

GVB-SA16

511611B8166 14 (0.186) AM (Top,4, Ar,5000.0,195.17,1.00,LS 10); Sm (Mn, 2x1.00); Sb (1,40.00)

1: TOF MS ES+  
4.20e3

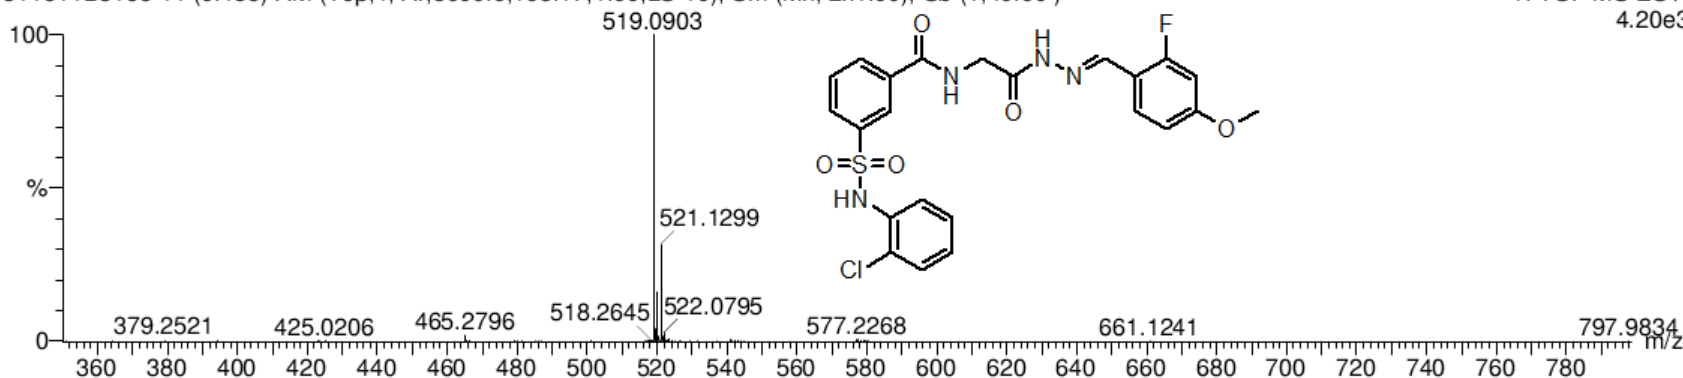

Minimum: -1.5  
Maximum: 5.0 1000.0 50.0

| Mass     | Calc. Mass | mDa  | PPM  | DBE  | i-FIT | Formula                                                              |
|----------|------------|------|------|------|-------|----------------------------------------------------------------------|
| 519.0903 | 519.0905   | -0.2 | -0.4 | 14.5 | 174.9 | C <sub>23</sub> H <sub>21</sub> N <sub>4</sub> O <sub>5</sub> F S Cl |

HRMS of Compound-1m

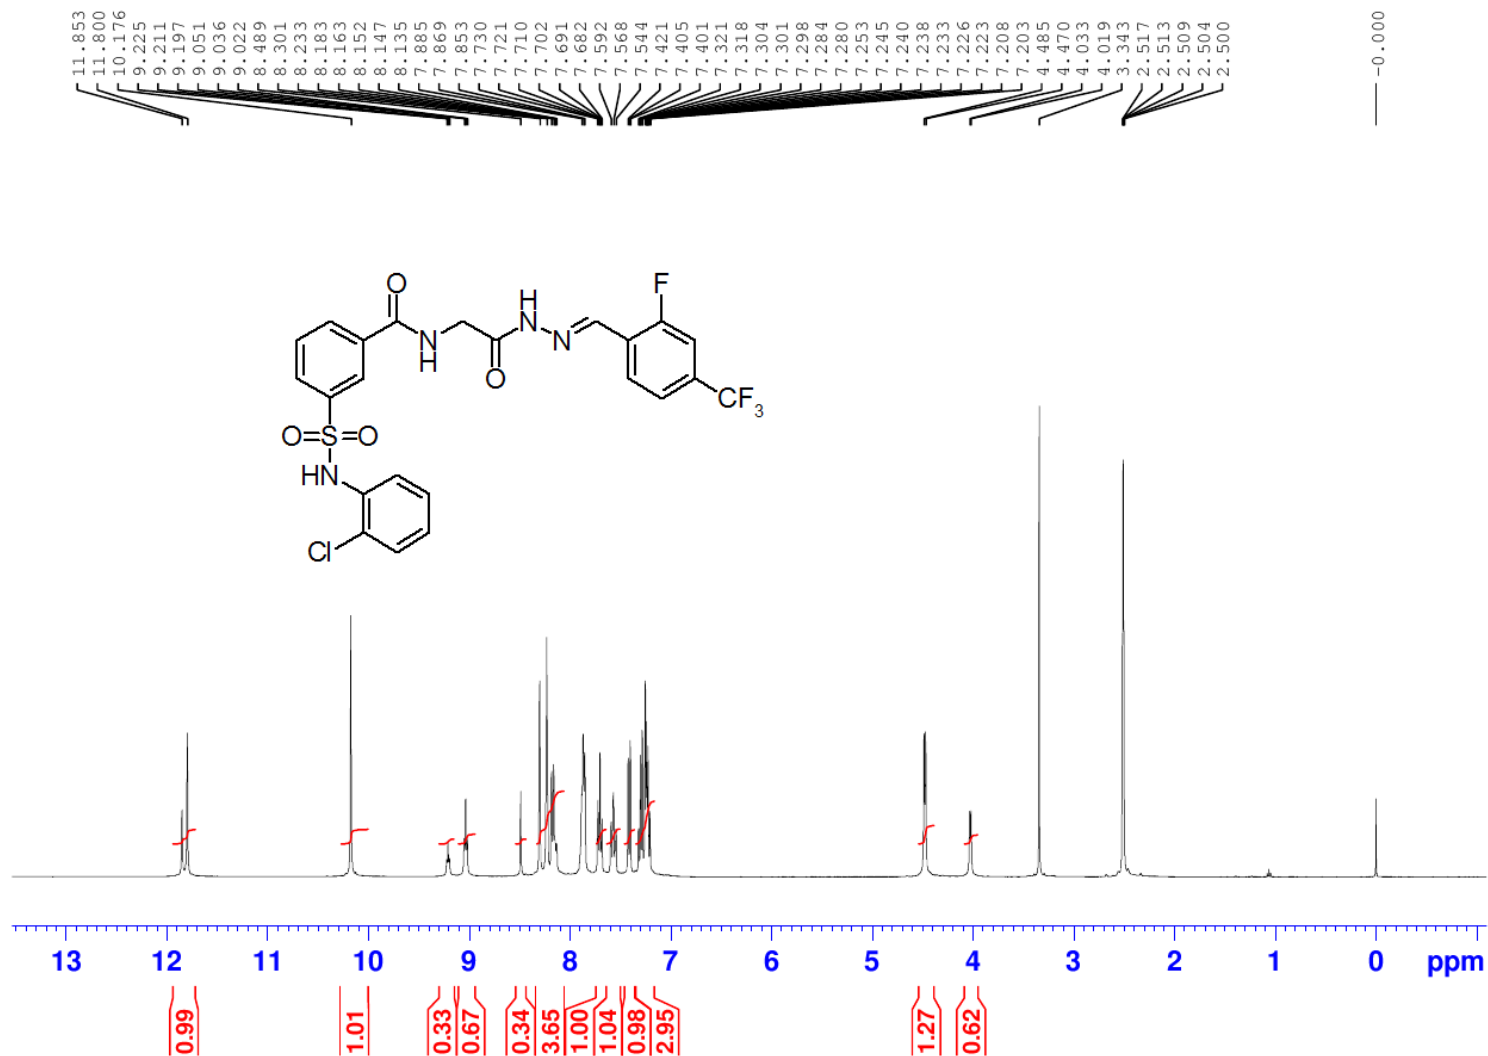

Current Data Parameters  
 NAME 511611B2473  
 EXPNO 1  
 PROCNO 1

F2 - Acquisition Parameters  
 Date\_ 20161120  
 Time 17.08  
 INSTRUM spect  
 PROBHD 5 mm PABBO BB/  
 PULPROG zg30  
 TD 65536  
 SOLVENT DMSO  
 NS 16  
 DS 2  
 SWH 8012.820 Hz  
 FIDRES 0.122266 Hz  
 AQ 4.0894465 sec  
 RG 86.08  
 DW 62.400 usec  
 DE 6.50 usec  
 TE 359.7 K  
 D1 1.00000000 sec  
 TD0 1

===== CHANNEL f1 =====  
 SFO1 400.1324710 MHz  
 NUC1 1H  
 P1 9.75 usec  
 PLW1 16.00000000 W

F2 - Processing parameters  
 SI 65536  
 SF 400.1299997 MHz  
 WDW EM  
 SSB 0  
 LB 0.30 Hz  
 GB 0  
 PC 1.00

ANL-MCL5-NMR-001

<sup>1</sup>H NMR of **Compound-1n** in DMSO-d<sub>6</sub>

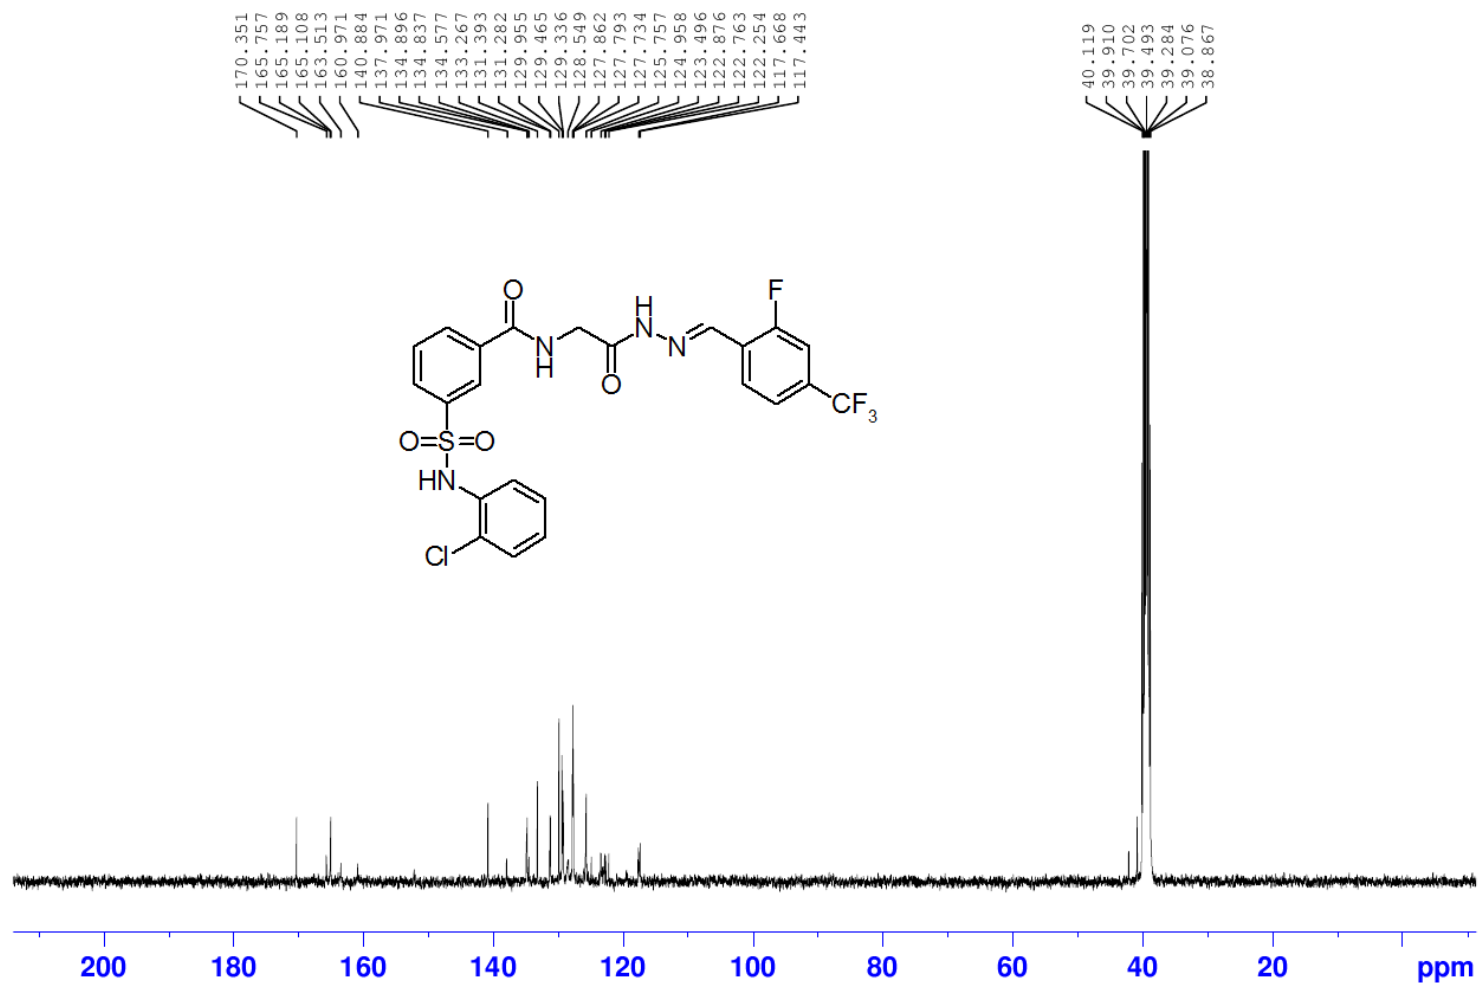

Current Data Parameters  
NAME 511611B2473  
EXPNO 2  
PROCNO 1

F2 - Acquisition Parameters  
Date\_ 20161120  
Time 18.25  
INSTRUM spect  
PROBHD 5 mm PABBO BB/  
PULPROG zgpg30  
TD 65536  
SOLVENT DMSO  
NS 1024  
DS 4  
SWH 24038.461 Hz  
FIDRES 0.366798 Hz  
AQ 1.3631488 sec  
RG 195.29  
DW 20.800 usec  
DE 6.50 usec  
TE 360.7 K  
D1 3.00000000 sec  
D11 0.03000000 sec  
TD0 1

===== CHANNEL f1 =====  
SFO1 100.6228293 MHz  
NUC1 13C  
P1 10.00 usec  
PLW1 78.00000000 W

===== CHANNEL f2 =====  
SFO2 400.1316005 MHz  
NUC2 1H  
CPDPRG[2] waltz16  
PCPD2 90.00 usec  
PLW2 16.00000000 W  
PLW12 0.18777999 W  
PLW13 0.15210000 W

F2 - Processing parameters  
SI 32768  
SF 100.6128185 MHz  
WDW EM  
SSB 0  
LB 2.00 Hz  
GB 0  
PC 1.40

ANL-MCL5-NMR-001

<sup>13</sup>CNMR of **Compound-1n** in DMSO-d<sub>6</sub>

## Elemental Composition Report

Page 1

### Single Mass Analysis

Tolerance = 1000.0 PPM / DBE: min = -1.5, max = 50.0

Selected filters: None

Monoisotopic Mass, Even Electron Ions

489 formula(e) evaluated with 1 results within limits (up to 1 best isotopic matches for each mass)

Elements Used:

C: 0-23 H: 0-18 N: 0-4 O: 0-4 F: 0-4 S: 0-1 Cl: 0-1

GVB-SA17

511611B8167 16 (0.238) AM (Top,4, Ar,5000.0,195.20,1.00,LS 10); Sm (Mn, 2x1.00); Sb (1,40.00 )

1: TOF MS ES+  
1.67e3

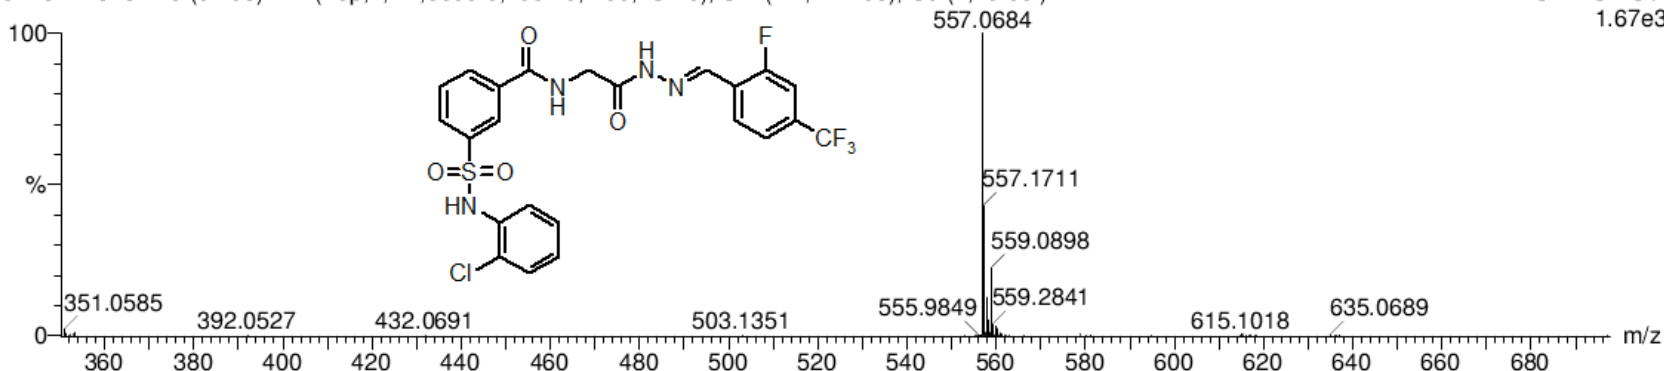

Minimum: -1.5  
Maximum: 5.0 1000.0 50.0

| Mass     | Calc. Mass | mDa | PPM | DBE  | i-FIT | Formula               |
|----------|------------|-----|-----|------|-------|-----------------------|
| 557.0684 | 557.0673   | 1.1 | 2.0 | 14.5 | 128.2 | C23 H18 N4 O4 F4 S Cl |

HRMS of Compound-1n

GVB-SA15  
 Reference Code: 511611B2469  
 Solvent: dmsd  
 Archive directory:  
 /home/gvkbio/data/2016/Nov  
 Agilent 400-MRDD2  
 Data collected on: Nov 17 2016  
 Experiment: PROTON

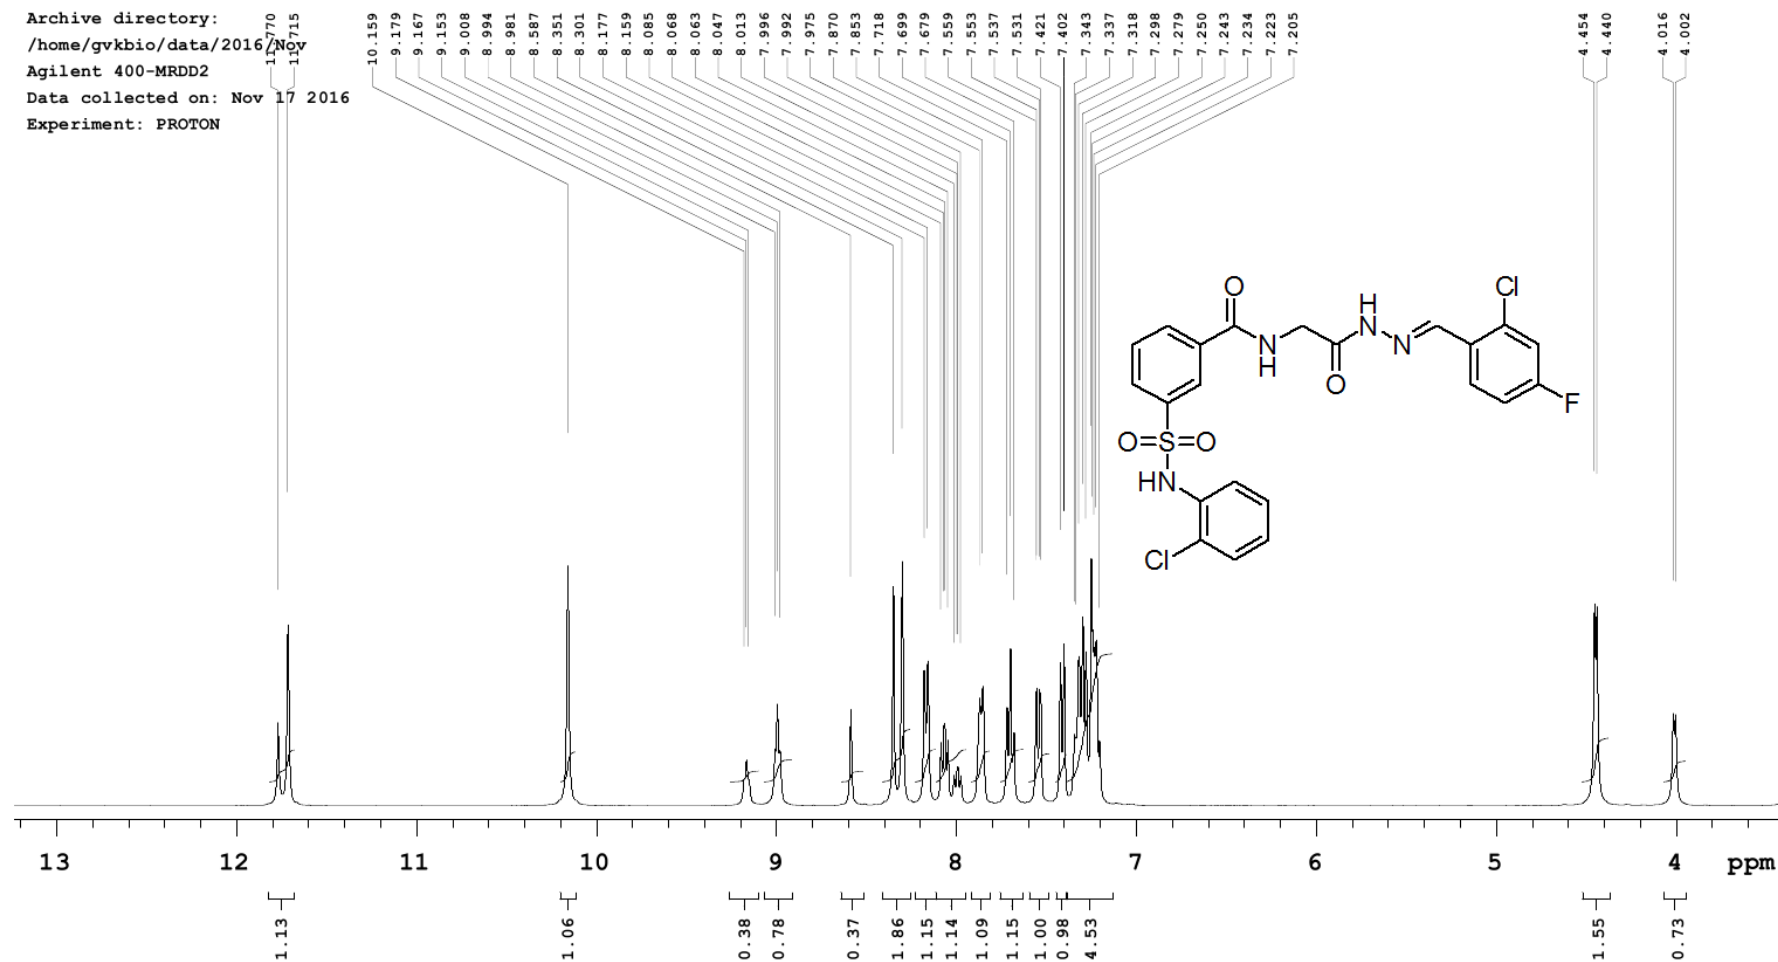

<sup>1</sup>H NMR of **Compound-1o** in DMSO-d<sub>6</sub>

GVB-SA-15

Reference Code: 511611B2469

Solvent: dms

Archive directory

/home/gvkbio/data/2010/Nov

Agilent 400-MRDP

Data collected on: Nov 17 2016

Experiment: CARBON

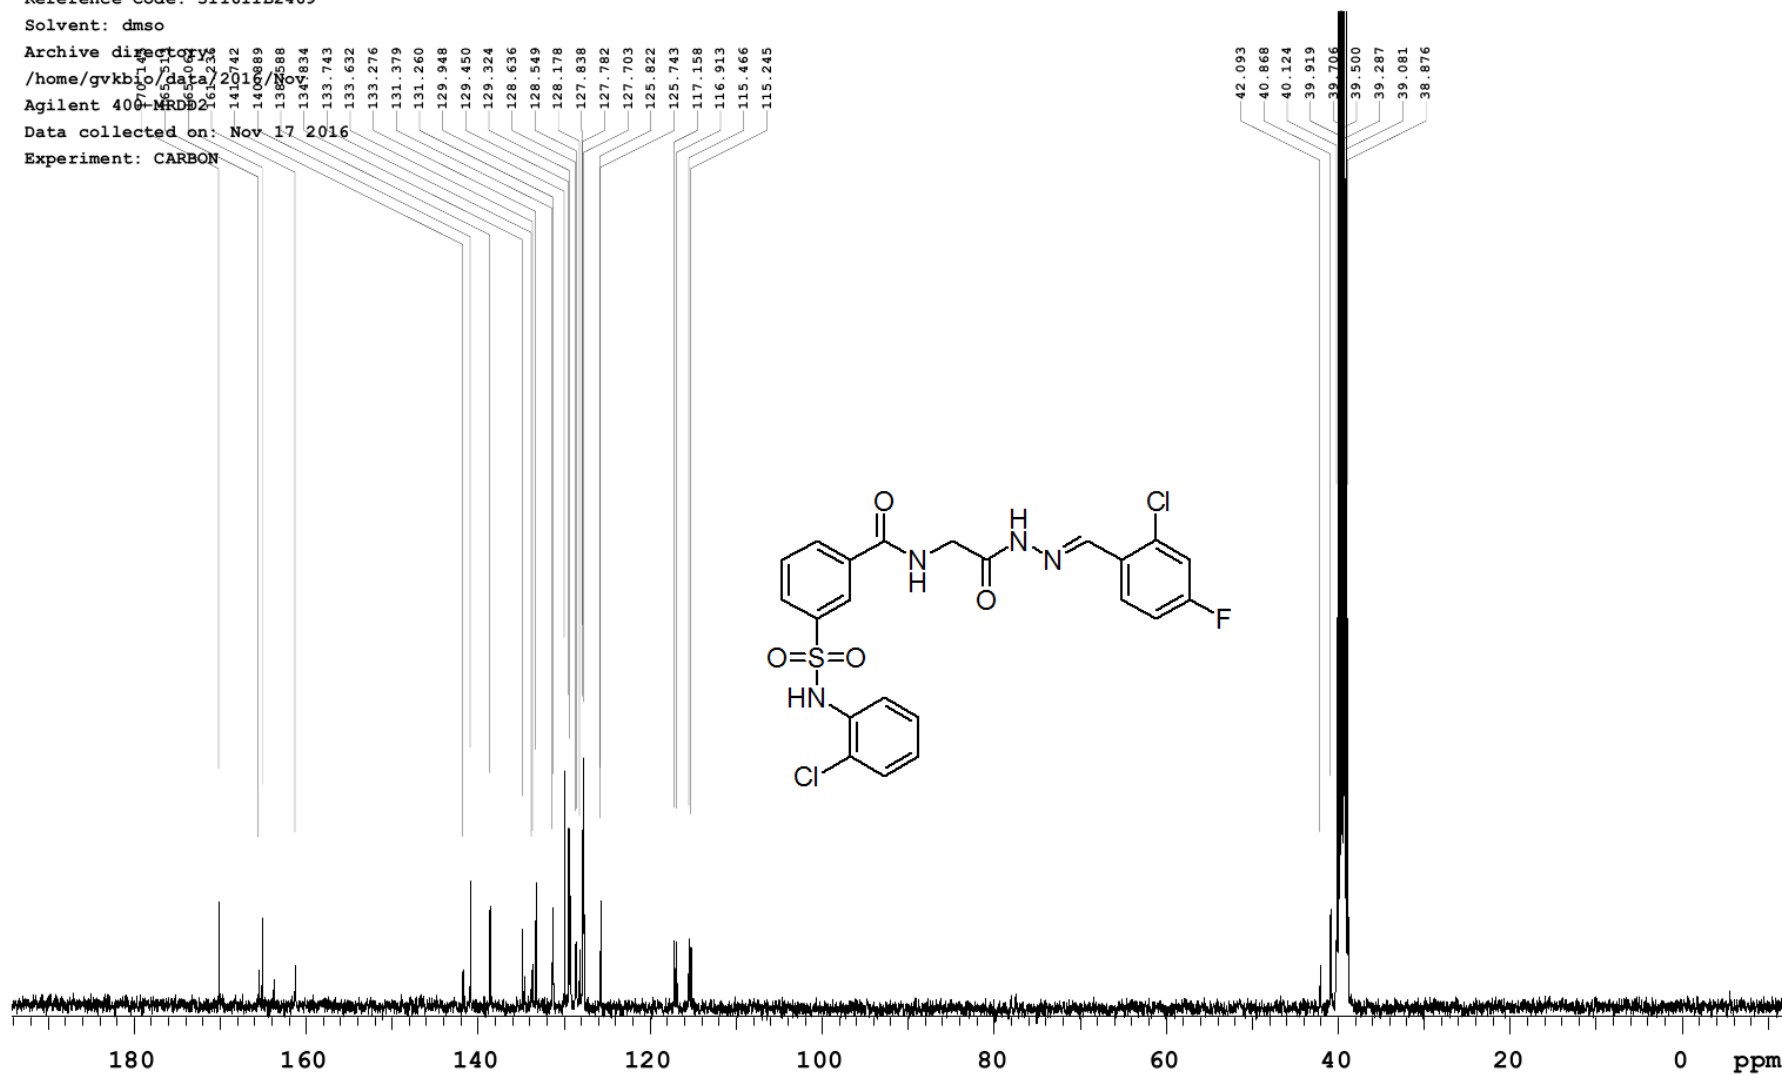

$^{13}\text{C}$ NMR of **Compound-1o** in  $\text{DMSO-}d_6$



## Elemental Composition Report

Page 1

### Single Mass Analysis

Tolerance = 1000.0 PPM / DBE: min = -1.5, max = 50.0

Selected filters: None

Monoisotopic Mass, Even Electron Ions

290 formula(e) evaluated with 1 results within limits (up to 1 best isotopic matches for each mass)

Elements Used:

C: 0-22 H: 0-18 N: 0-4 O: 0-4 F: 0-1 S: 0-1 Cl: 0-2

GVB-SA15

511611B8164 17 (0.251) AM (Top,4, Ar,5000.0,195.15,1.00,LS 10); Sm (Mn, 2x1.00); Sb (1,40.00)

1: TOF MS ES+  
1.37e3

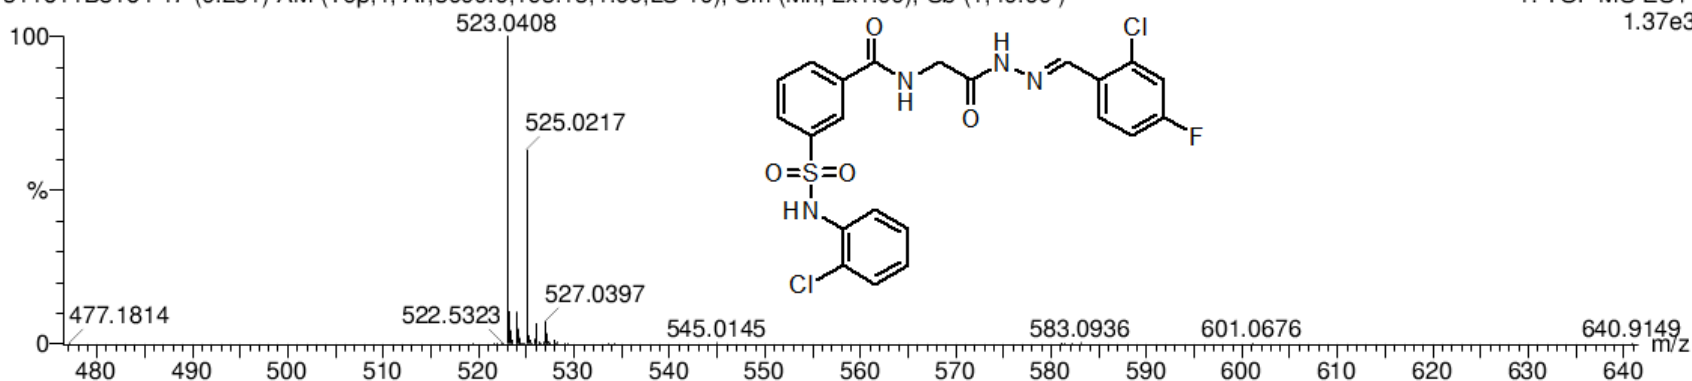

Minimum: -1.5  
Maximum: 5.0 1000.0 50.0

| Mass     | Calc. Mass | mDa  | PPM  | DBE  | i-FIT | Formula               |
|----------|------------|------|------|------|-------|-----------------------|
| 523.0408 | 523.0410   | -0.2 | -0.4 | 14.5 | 120.3 | C22 H18 N4 O4 F S Cl2 |

HRMS of Compound-1o

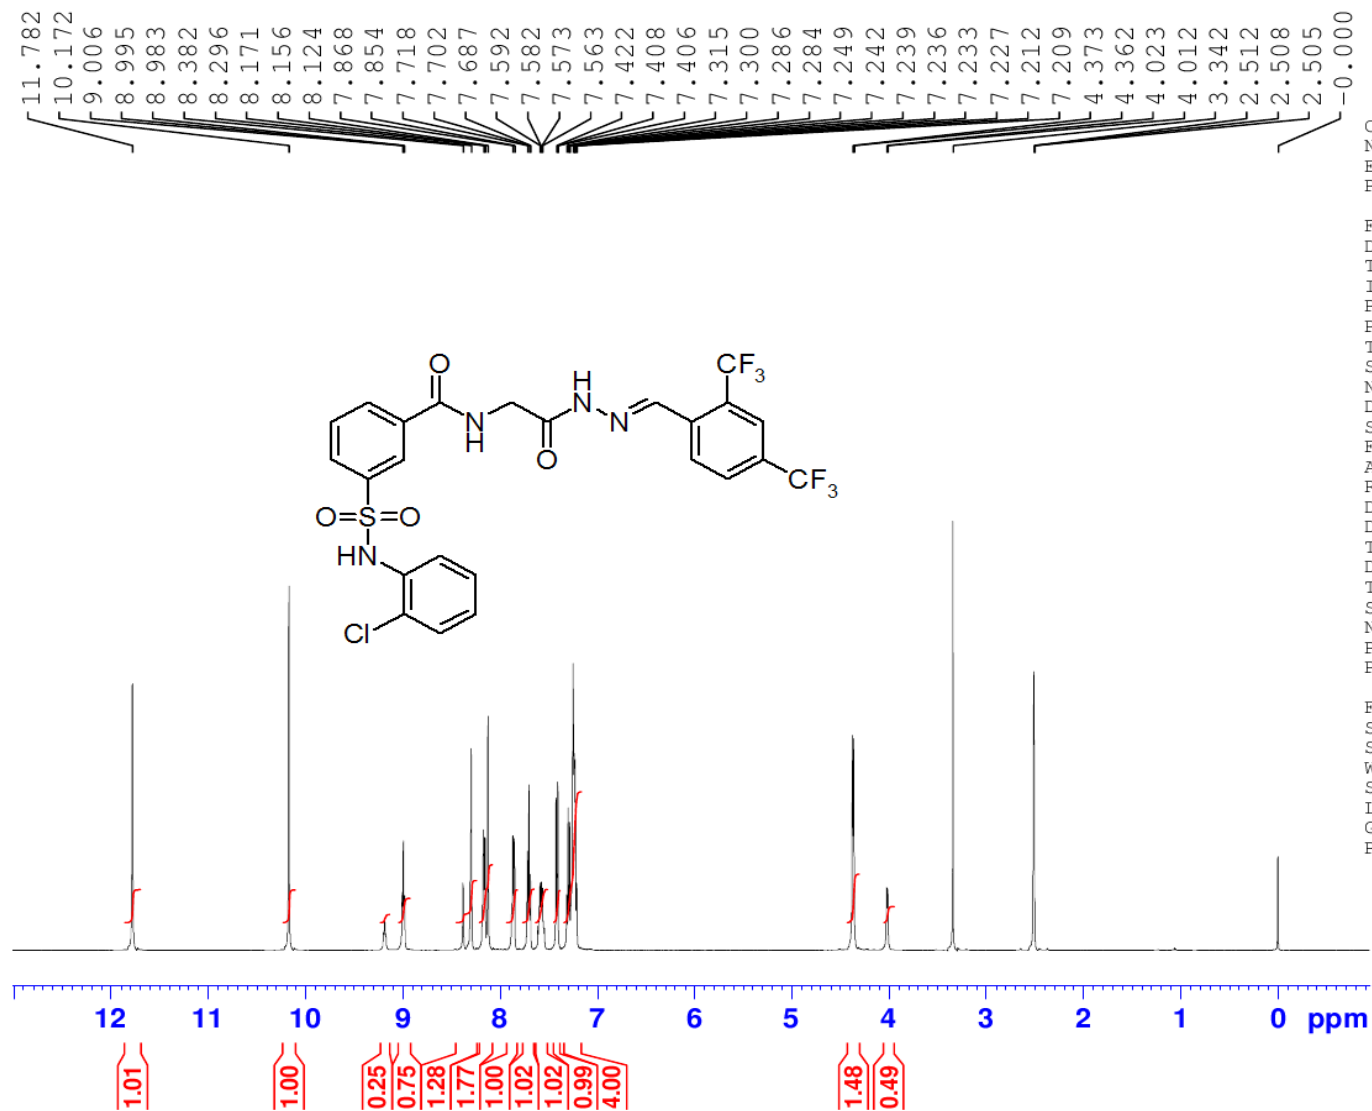

Current Data Parameters  
 NAME 511611B1542  
 EXPNO 1  
 PROCNO 1

F2 - Acquisition Parameters  
 Date\_ 20161115  
 Time 8.09 h  
 INSTRUM spect  
 PROBHD Z119470\_0231 (   
 PULPROG zg30  
 TD 65536  
 SOLVENT DMSO  
 NS 8  
 DS 0  
 SWH 10000.000 Hz  
 FIDRES 0.305176 Hz  
 AQ 3.2767999 sec  
 RG 97.81  
 DW 50.000 usec  
 DE 6.50 usec  
 TE 298.1 K  
 D1 1.00000000 sec  
 TD0 1  
 SFO1 500.1330885 MHz  
 NUC1 1H  
 P1 8.75 usec  
 PLW1 23.00000000 W

F2 - Processing parameters  
 SI 65536  
 SF 500.1300002 MHz  
 WDW EM  
 SSB 0  
 LB 0.30 Hz  
 GB 0  
 PC 1.00

<sup>1</sup>H NMR of **Compound-1p** in DMSO-d<sub>6</sub>

GVB-SA13

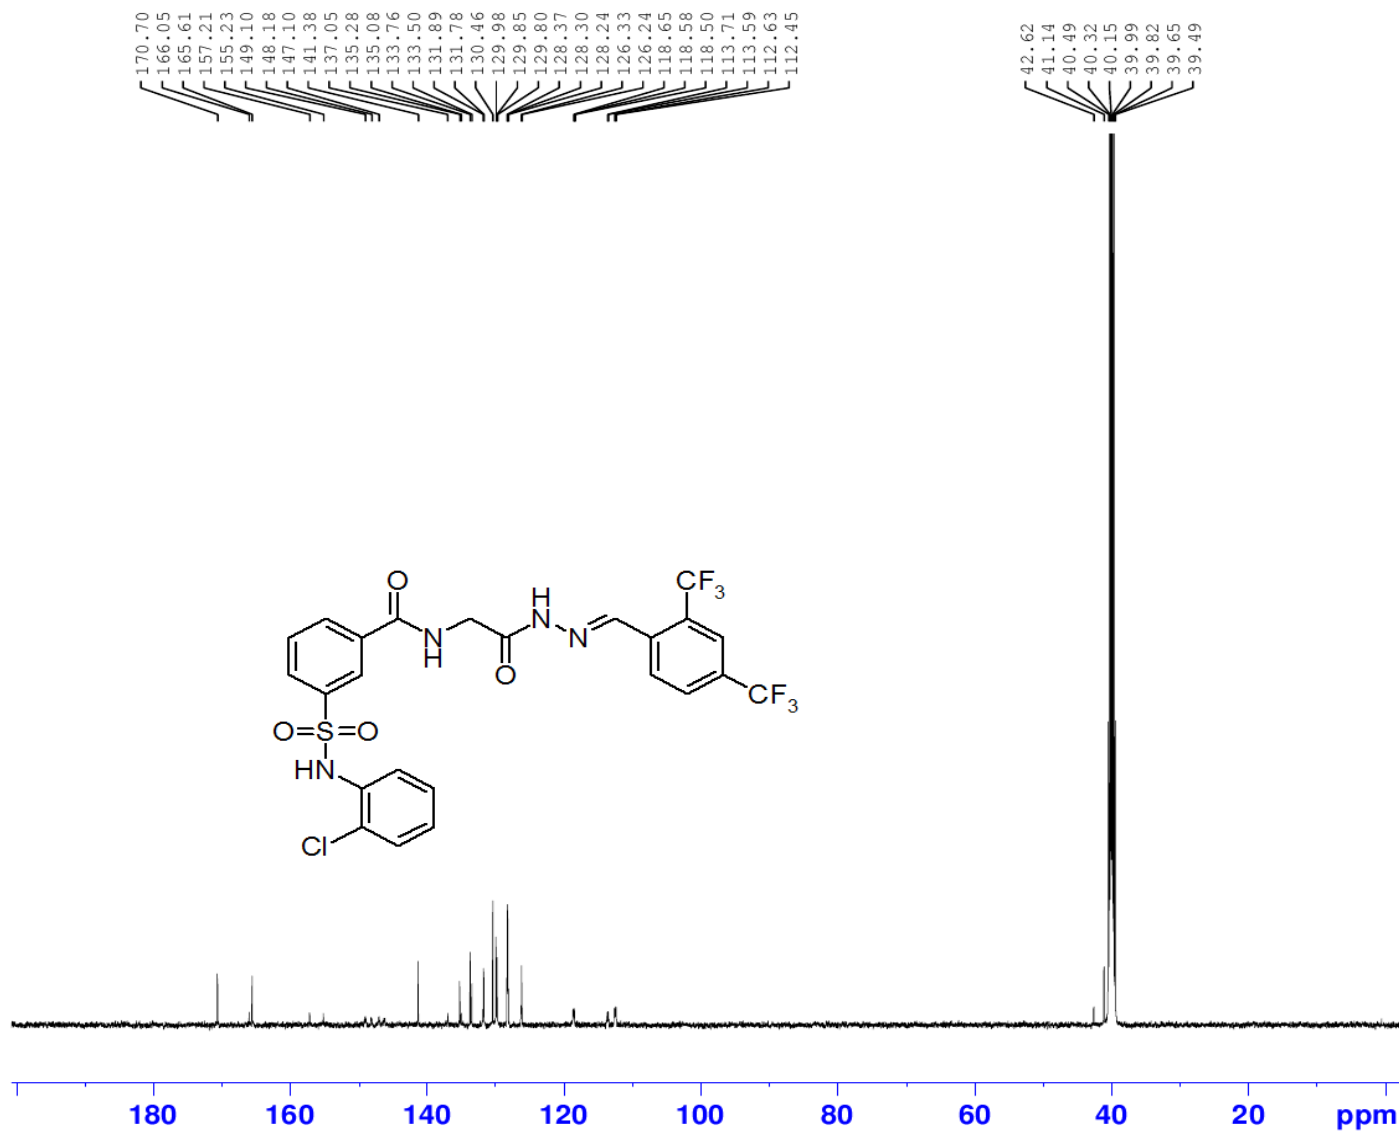

Current Data Parameters  
 NAME 511611B1542  
 EXPNO 2  
 PROCNO 1

F2 - Acquisition Parameters  
 Date\_ 20161115  
 Time 9.00 h  
 INSTRUM spect  
 PROBHD z119470\_0231 (  
 PULPROG zgpg30  
 TD 65536  
 SOLVENT DMSO  
 NS 711  
 DS 4  
 SWH 29761.904 Hz  
 FIDRES 0.908261 Hz  
 AQ 1.1010048 sec  
 RG 197.72  
 DW 16.800 usec  
 DE 6.50 usec  
 TE 298.2 K  
 D1 3.00000000 sec  
 D11 0.03000000 sec  
 TD0 1  
 SFO1 125.7703643 MHz  
 NUC1 13C  
 P1 9.50 usec  
 PLW1 88.00000000 W  
 SFO2 500.1320005 MHz  
 NUC2 1H  
 CPDPRG[2] waltz16  
 PCPD2 80.00 usec  
 PLW2 23.00000000 W  
 PLW12 0.27515000 W  
 PLW13 0.13840000 W

F2 - Processing parameters  
 SI 32768  
 SF 125.7577885 MHz  
 WDW EM  
 SSB 0  
 LB 2.00 Hz  
 GB 0  
 PC 1.40

<sup>13</sup>CNMR of Compound-1p in DMSO-d<sub>6</sub>

## Elemental Composition Report

Page 1

### Single Mass Analysis

Tolerance = 1000.0 PPM / DBE: min = -1.5, max = 50.0

Selected filters: None

Monoisotopic Mass, Even Electron Ions

689 formula(e) evaluated with 1 results within limits (up to 1 best isotopic matches for each mass)

Elements Used:

C: 0-24 H: 0-18 N: 0-4 O: 0-4 F: 0-6 S: 0-1 Cl: 0-1

GVB-SA13

511611B8159 16 (0.238) AM (Top,4, Ar,5000.0,195.17,1.00,LS 10); Sm (Mn, 2x1.00); Sb (1,40.00)

1: TOF MS ES+  
795

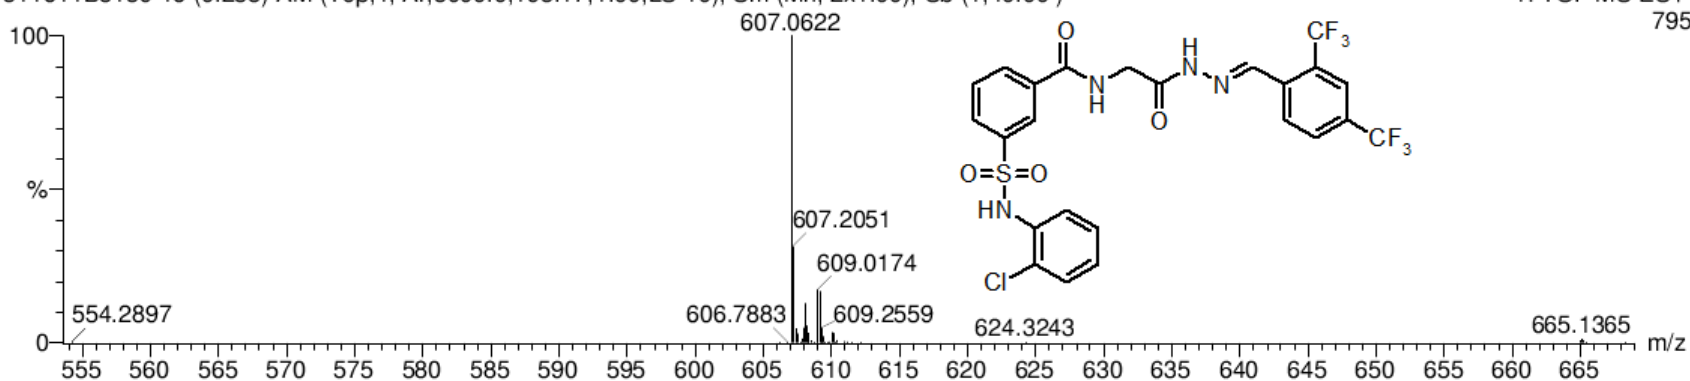

Minimum: -1.5  
Maximum: 5.0 1000.0 50.0

| Mass     | Calc. Mass | mDa  | PPM  | DBE  | i-FIT | Formula                                                                           |
|----------|------------|------|------|------|-------|-----------------------------------------------------------------------------------|
| 607.0622 | 607.0641   | -1.9 | -3.1 | 14.5 | 85.5  | C <sub>24</sub> H <sub>18</sub> N <sub>4</sub> O <sub>4</sub> F <sub>6</sub> S Cl |

HRMS of Compound-1p

GVB-SA18  
 Reference Code: 511611C0226  
 Solvent: dmsc  
 Archive directory:  
 /home/gvkbio/data/2016/Nov  
 Agilent 400-MRDD2  
 Data collected on: Nov 27 2016  
 Experiment: PROTON

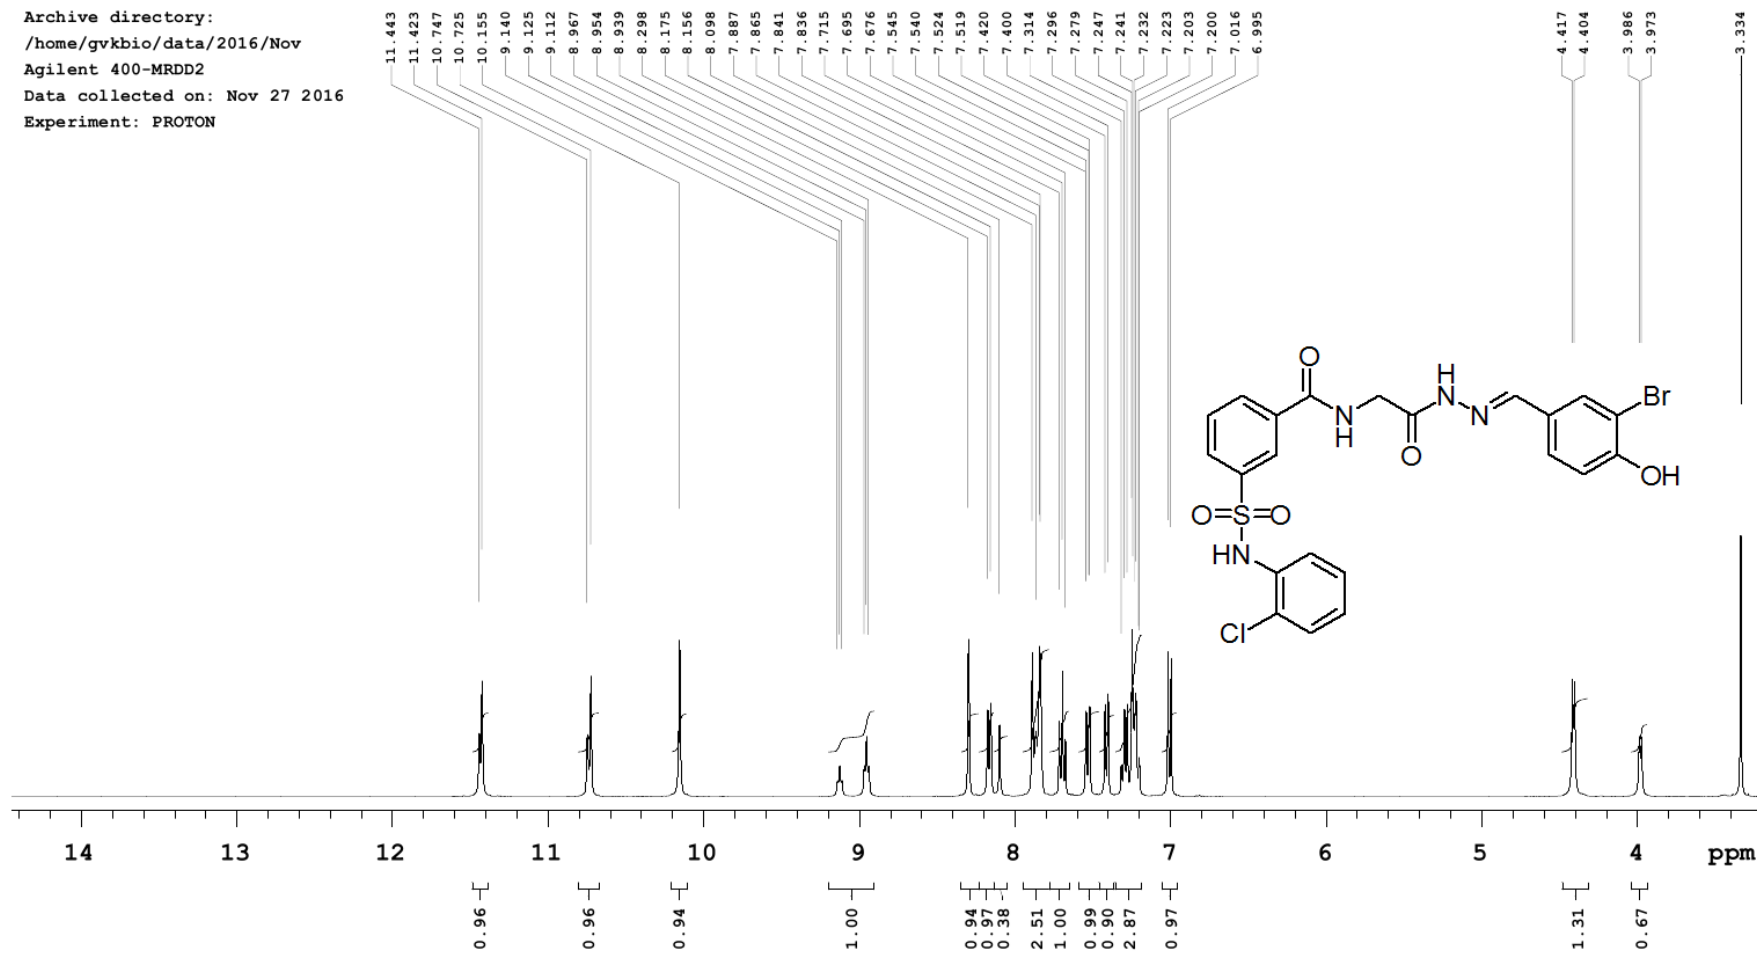

<sup>1</sup>H NMR of **Compound-1q** in DMSO-d<sub>6</sub>

GVB-SA18

Reference Code: 511611C0226

Solvent: dms

Archive directory:

/home/gvkbio/data/2016

Agilent 400-MRDD2

Data collected on: Nov 27 2016

Experiment: CARBON

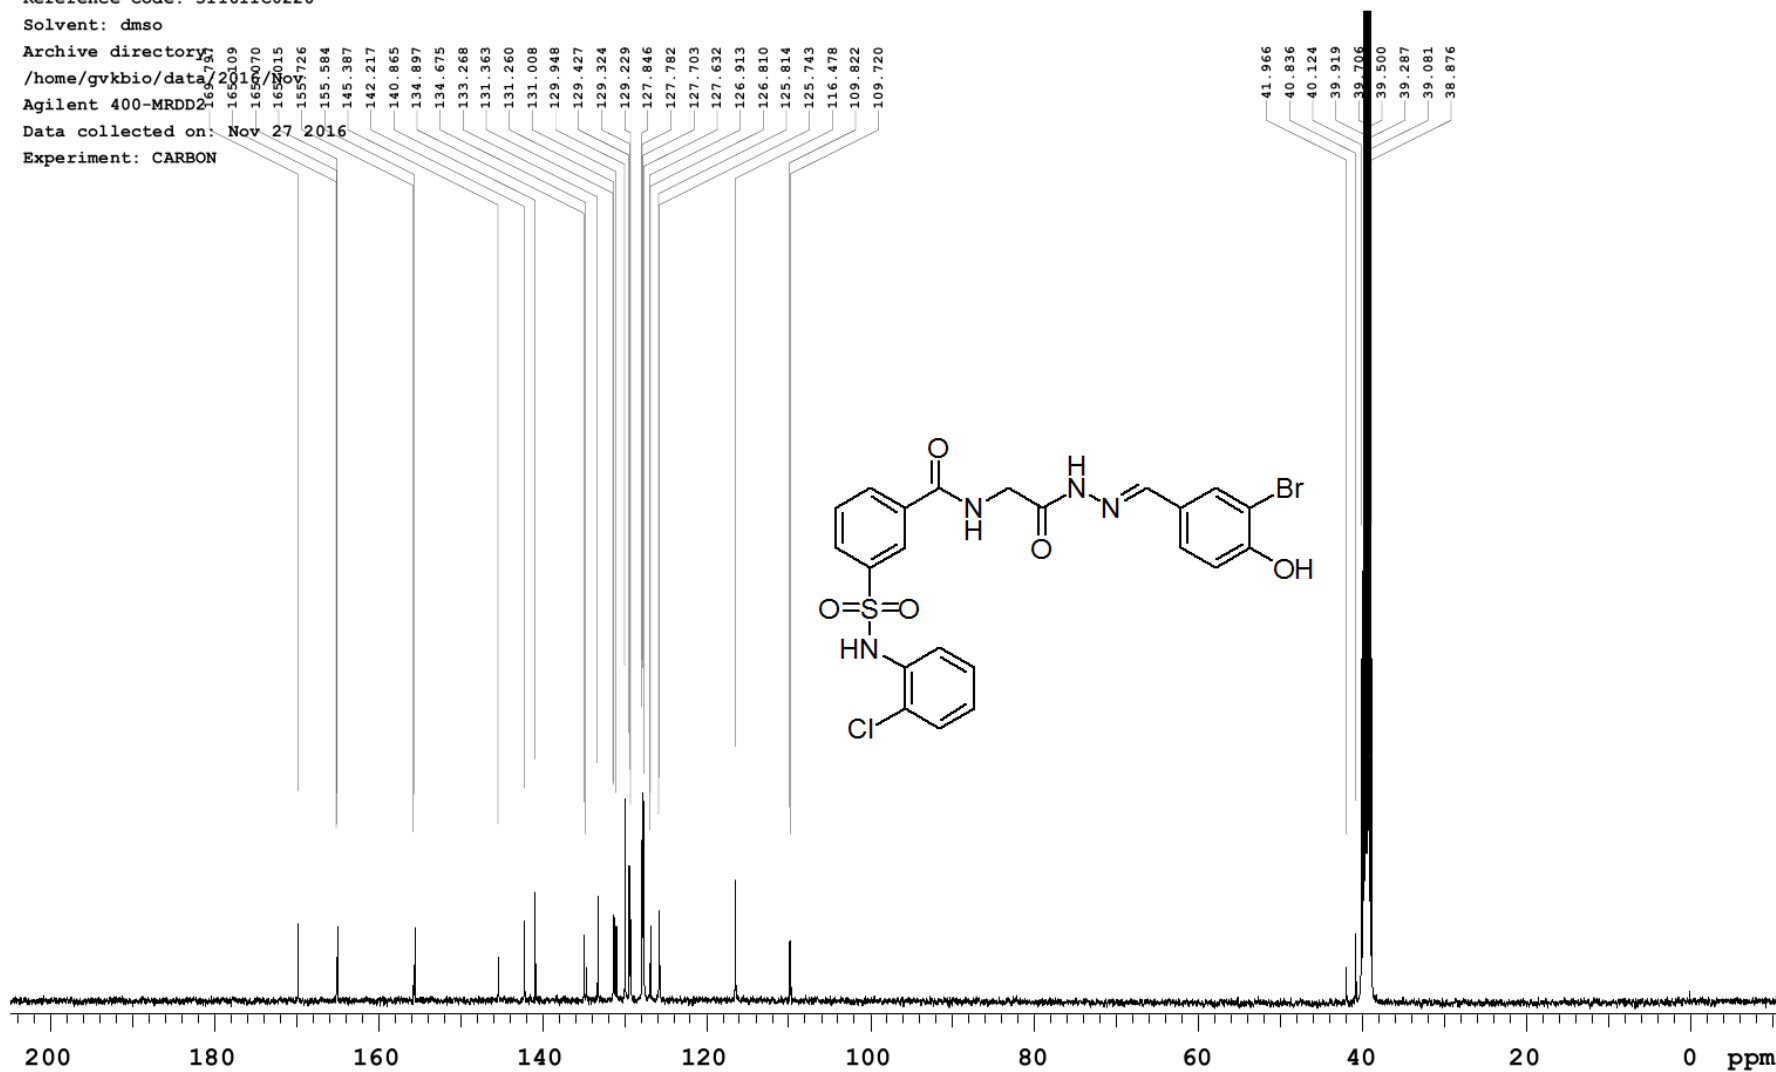

$^{13}\text{C}$ NMR of Compound-1q in DMSO- $d_6$

## Elemental Composition Report

Page 1

### Single Mass Analysis

Tolerance = 1000.0 PPM / DBE: min = -1.5, max = 50.0

Selected filters: None

Monoisotopic Mass, Even Electron Ions

233 formula(e) evaluated with 1 results within limits (up to 1 best isotopic matches for each mass)

Elements Used:

C: 0-22 H: 0-19 N: 0-4 O: 0-5 S: 0-1 Cl: 0-1 Br: 0-1

GVB-SA18

511611B8168 15 (0.229) AM (Top,4, Ar,5000.0,195.14,1.00,LS 10); Sm (Mn, 2x1.00); Sb (1,40.00 )

1: TOF MS ES+  
586

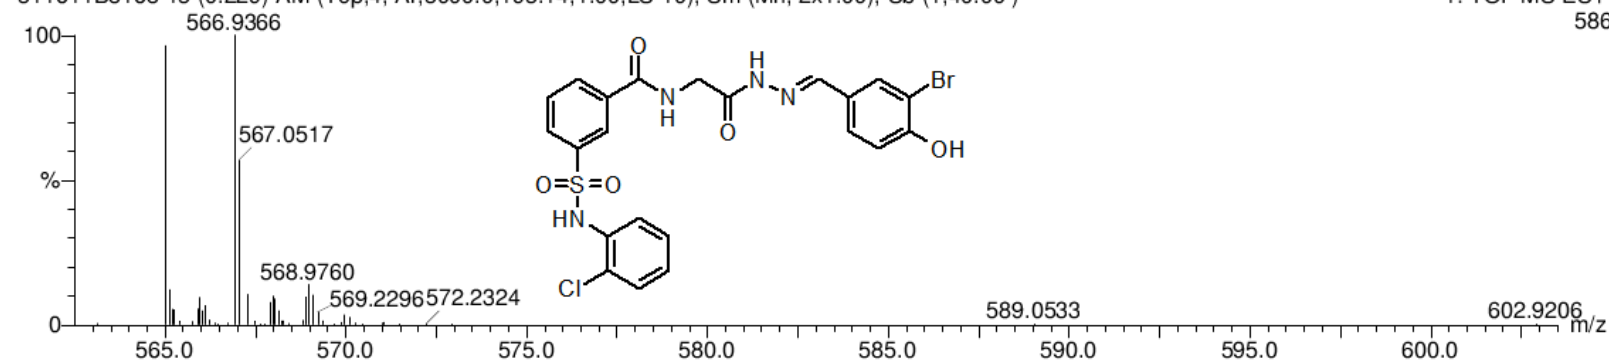

Minimum: -1.5  
Maximum: 5.0 1000.0 50.0

| Mass     | Calc. Mass | mDa  | PPM  | DBE  | i-FIT  | Formula               |
|----------|------------|------|------|------|--------|-----------------------|
| 564.9930 | 564.9948   | -1.8 | -3.2 | 14.5 | 4654.9 | C22 H19 N4 O5 S Cl Br |

HRMS of Compound-1q

GVB-SA11  
 Reference Code: 511611C0225  
 Solvent: dmsd  
 Archive directory:  
 /home/gvkbio/data/2016/Nov  
 Agilent 400-MRDD2  
 Data collected on: Nov 24 2016  
 Experiment: PROTON

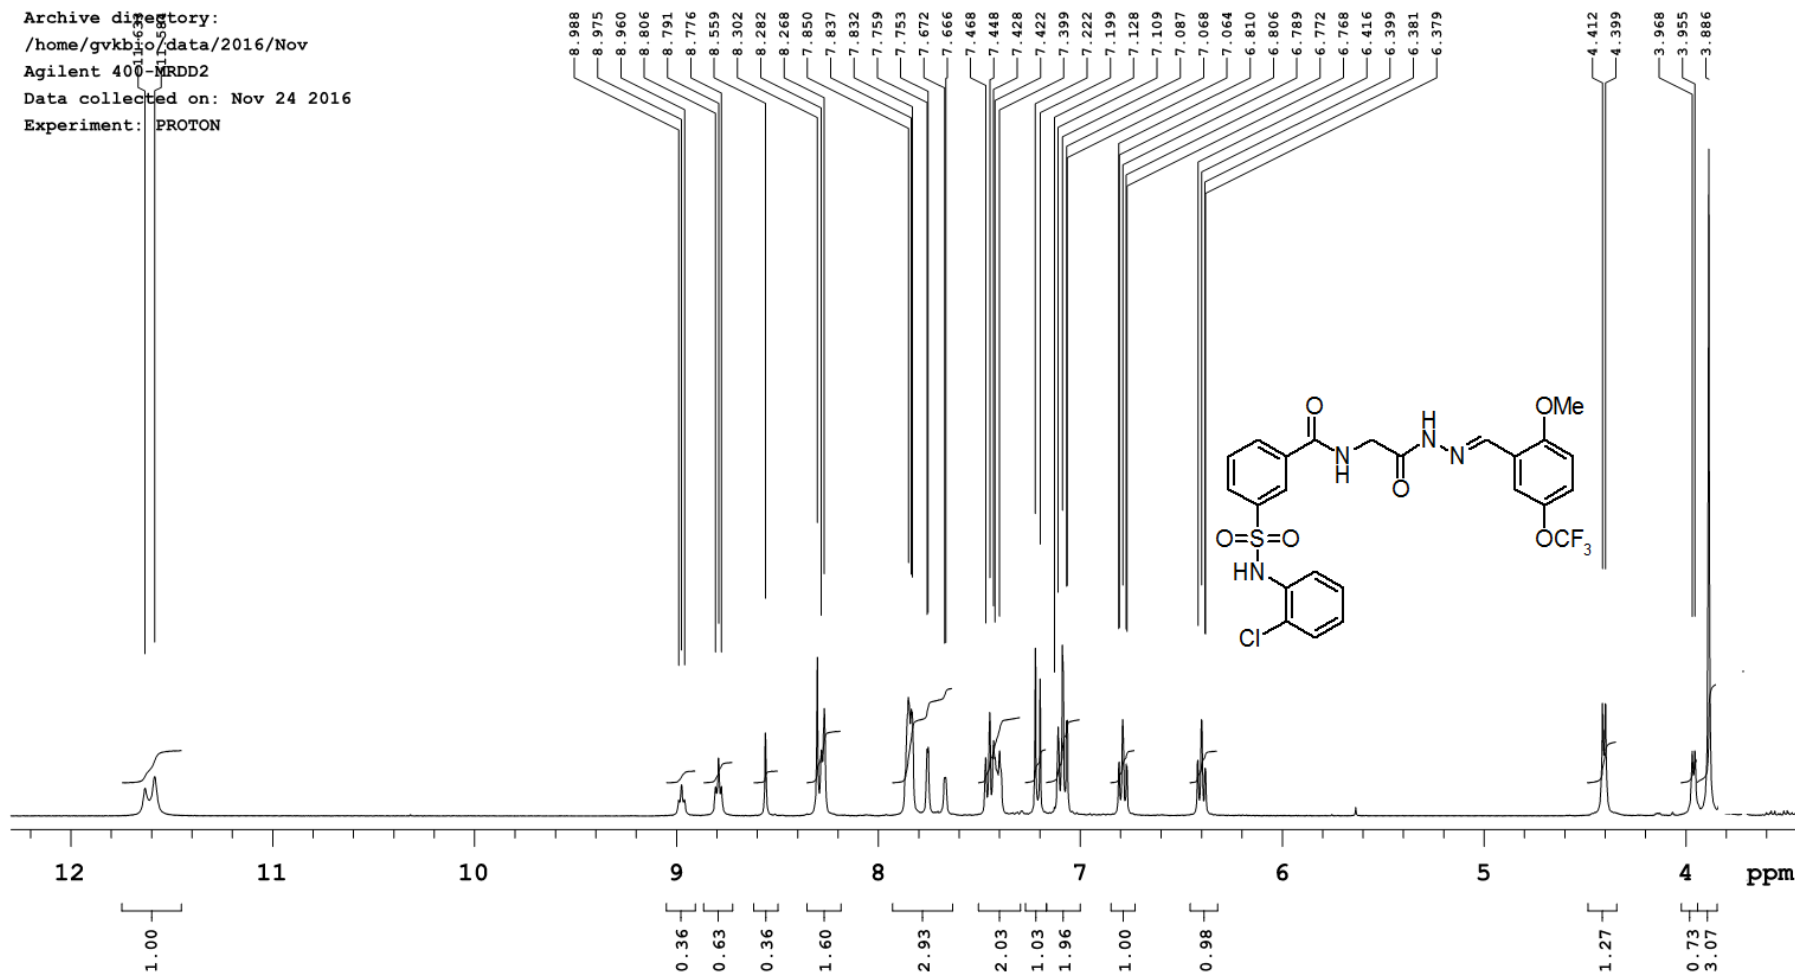

<sup>1</sup>H NMR of **Compound-1r** in DMSO-d<sub>6</sub>



GVB-SA11

Reference Code: 511611C0225

Solvent: dmsc

Archive directory:

/home/gvkbio/data/2016/Nov

Agilent 400-MRDD2

Data collected on: Nov 24 2016

Experiment: CARBON

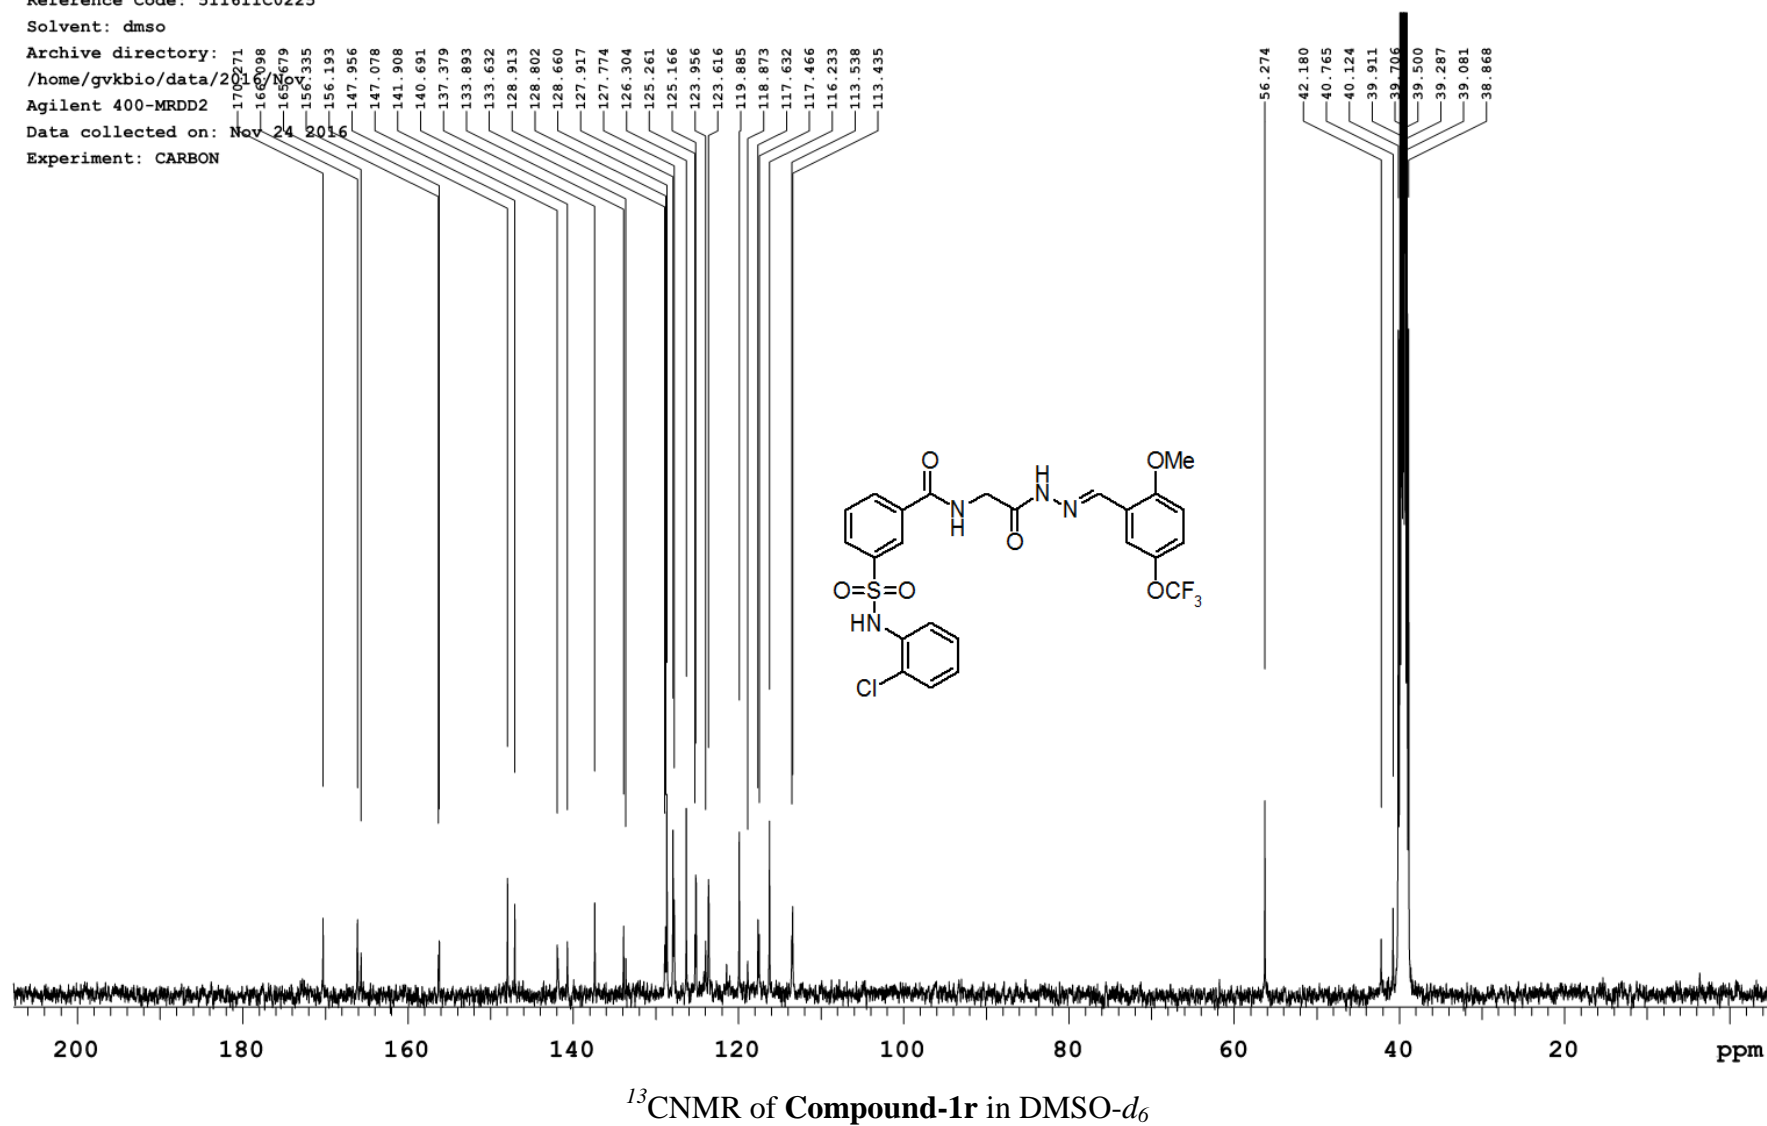

## Elemental Composition Report

Page 1

### Single Mass Analysis

Tolerance = 1000.0 PPM / DBE: min = -1.5, max = 50.0

Selected filters: None

Monoisotopic Mass, Even Electron Ions

549 formula(e) evaluated with 1 results within limits (up to 1 best isotopic matches for each mass)

Elements Used:

C: 0-24 H: 0-21 N: 0-4 O: 0-6 F: 0-3 S: 0-1 Cl: 0-1

GVB-SA11

511611B8155 9 (0.118) AM (Top,4, Ar,5000.0,195.18,1.00,LS 10); Sm (Mn, 2x1.00); Sb (1,40.00 )

1: TOF MS ES+  
1.06e3

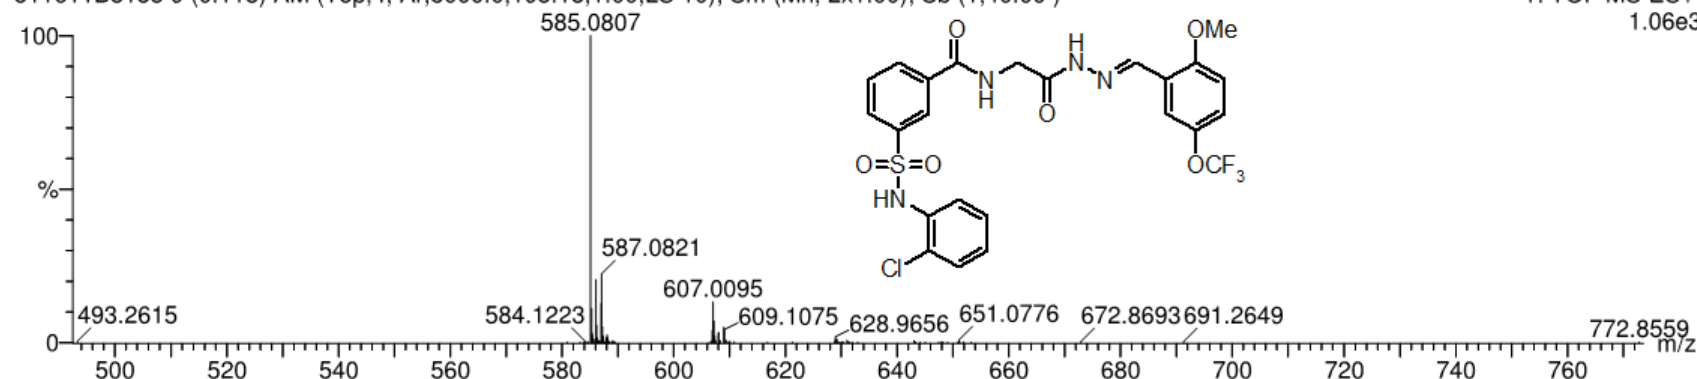

Minimum: -1.5  
Maximum: 5.0 1000.0 50.0

| Mass     | Calc. Mass | mDa  | PPM  | DBE  | i-FIT | Formula               |
|----------|------------|------|------|------|-------|-----------------------|
| 585.0807 | 585.0822   | -1.5 | -2.6 | 14.5 | 54.1  | C24 H21 N4 O6 F3 S Cl |

HRMS of Compound-1r

GVB-SA23  
Reference Code: 511611C0228  
Solvent: dms  
Archive directory:  
/home/gvkbio/data/2016/Nov  
Agilent 400-MRDD2  
Data collected on: Nov 23 2016  
Experiment: PROTON

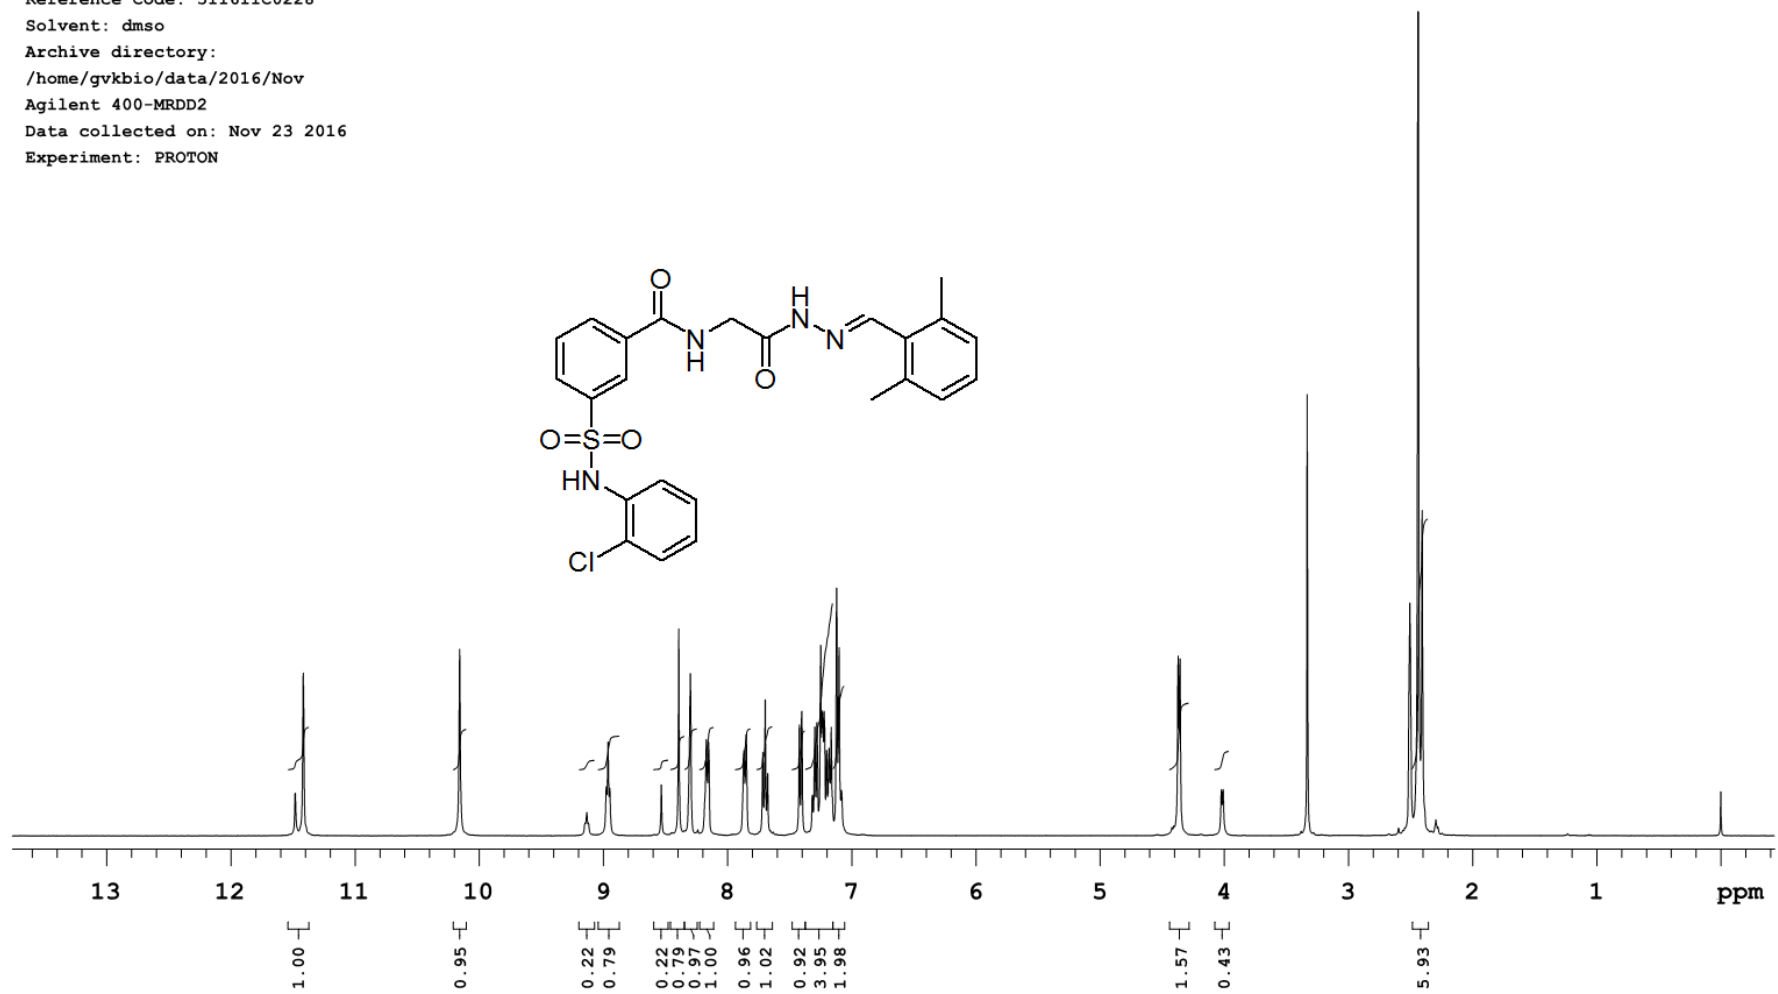

<sup>1</sup>H NMR of **Compound-1s** in DMSO-d<sub>6</sub>

GVB-SA23

Reference Code: 511611C0228

Solvent: dmsc

Archive directory:

/home/gvkbio/data/2016/Nov

Agilent 400-MRDD2

Data collected on: Nov 23 2016

Experiment: CARBON

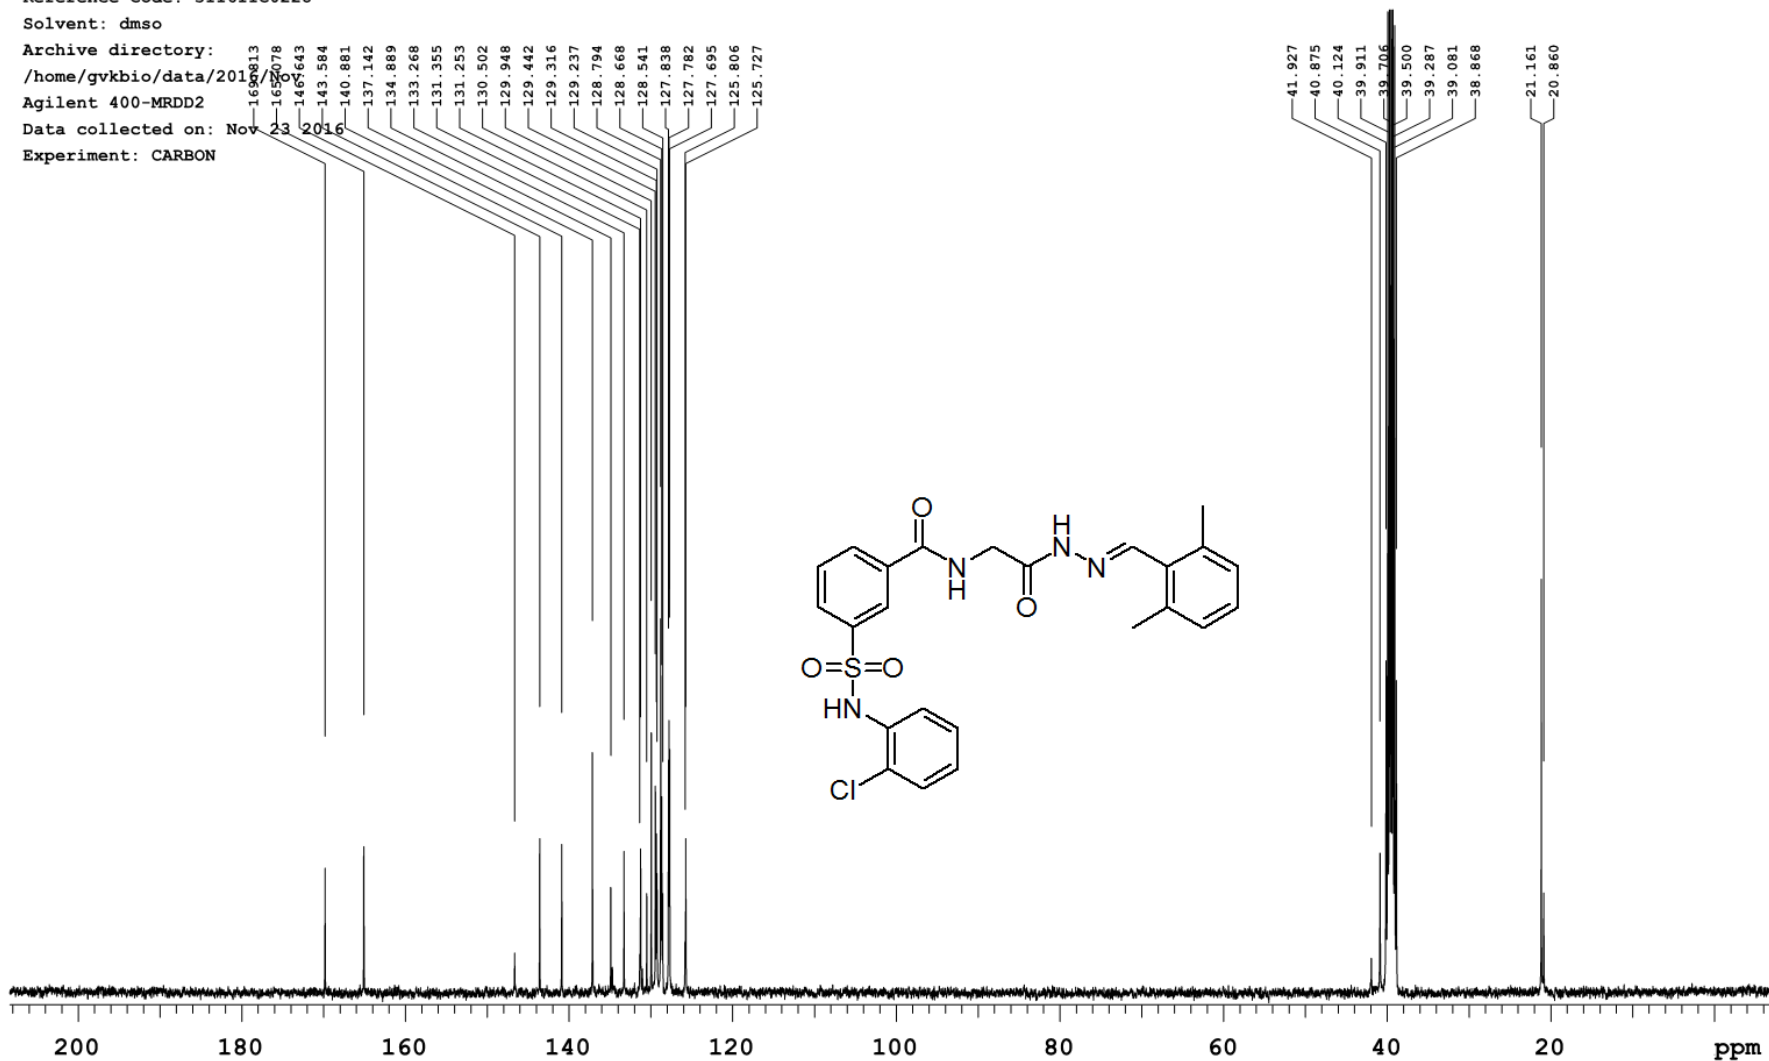

<sup>13</sup>CNMR of **Compound-1s** in DMSO-*d*<sub>6</sub>

## Elemental Composition Report

Page 1

### Single Mass Analysis

Tolerance = 1000.0 PPM / DBE: min = -1.5, max = 50.0

Selected filters: None

Monoisotopic Mass, Even Electron Ions

87 formula(e) evaluated with 2 results within limits (up to 1 best isotopic matches for each mass)

Elements Used:

C: 0-25 H: 0-26 N: 0-4 O: 0-4 S: 0-1 Cl: 0-1

GVB-SA23

511611B8552 19 (0.268) AM (Top,4, Ar,5000.0,195.18,1.00,LS 10); Sm (Mn, 2x1.00); Sb (1,40.00 )

1: TOF MS ES+  
3.45e3

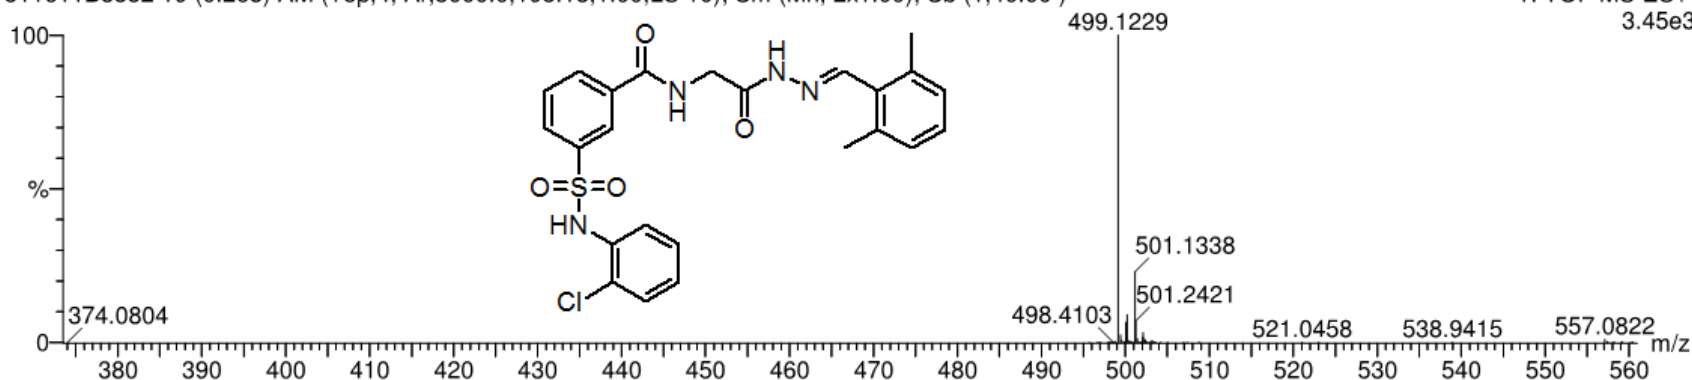

Minimum: -1.5  
Maximum: 5.0 1000.0 50.0

| Mass     | Calc. Mass | mDa | PPM | DBE  | i-FIT | Formula            |
|----------|------------|-----|-----|------|-------|--------------------|
| 499.1229 | 499.1207   | 2.2 | 4.4 | 14.5 | 440.4 | C24 H24 N4 O4 S Cl |

HRMS of Compound-1s

GVB-SA12

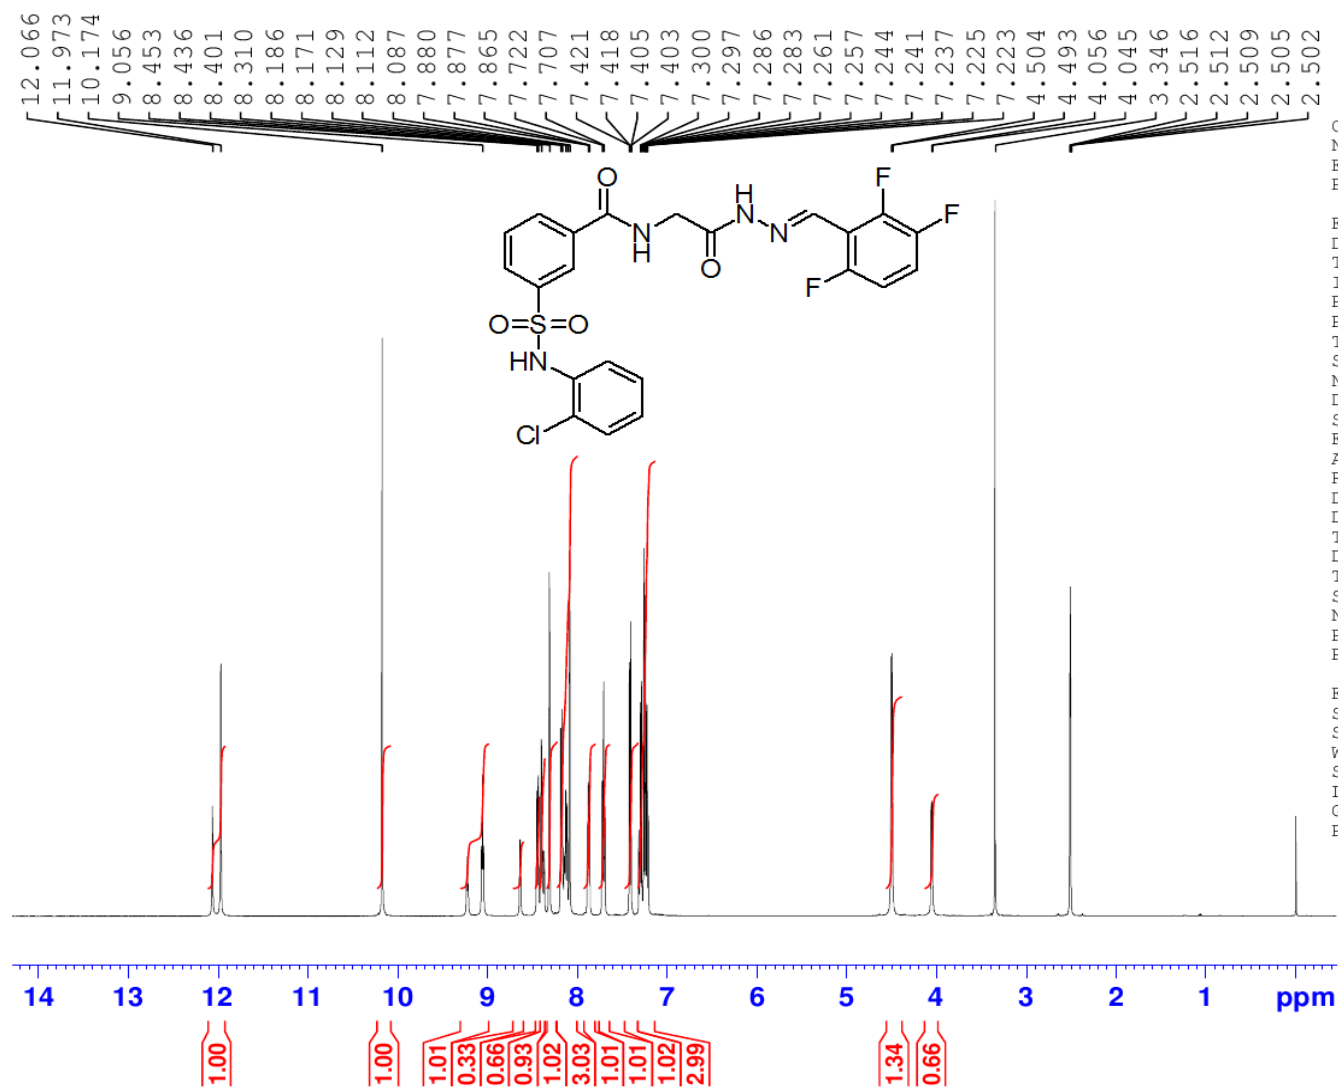

Current Data Parameters  
 NAME 511611B1541  
 EXPNO 1  
 PROCNO 1

F2 - Acquisition Parameters  
 Date\_ 20161115  
 Time 21.08 h  
 INSTRUM spect  
 PROBHD Z119470\_0231 (   
 PULPROG zg30  
 TD 65536  
 SOLVENT DMSO  
 NS 8  
 DS 0  
 SWH 10000.000 Hz  
 FIDRES 0.305176 Hz  
 AQ 3.2767999 sec  
 RG 89.27  
 DW 50.000 usec  
 DE 6.50 usec  
 TE 298.5 K  
 D1 1.00000000 sec  
 TD0 1  
 SFO1 500.1330885 MHz  
 NUC1 1H  
 P1 8.75 usec  
 PLW1 23.00000000 W

F2 - Processing parameters  
 SI 65536  
 SF 500.1300000 MHz  
 WDW EM  
 SSB 0  
 LB 0.30 Hz  
 GB 0  
 PC 1.00

<sup>1</sup>H NMR of Compound-1t in DMSO-d<sub>6</sub>

GVB-SA12

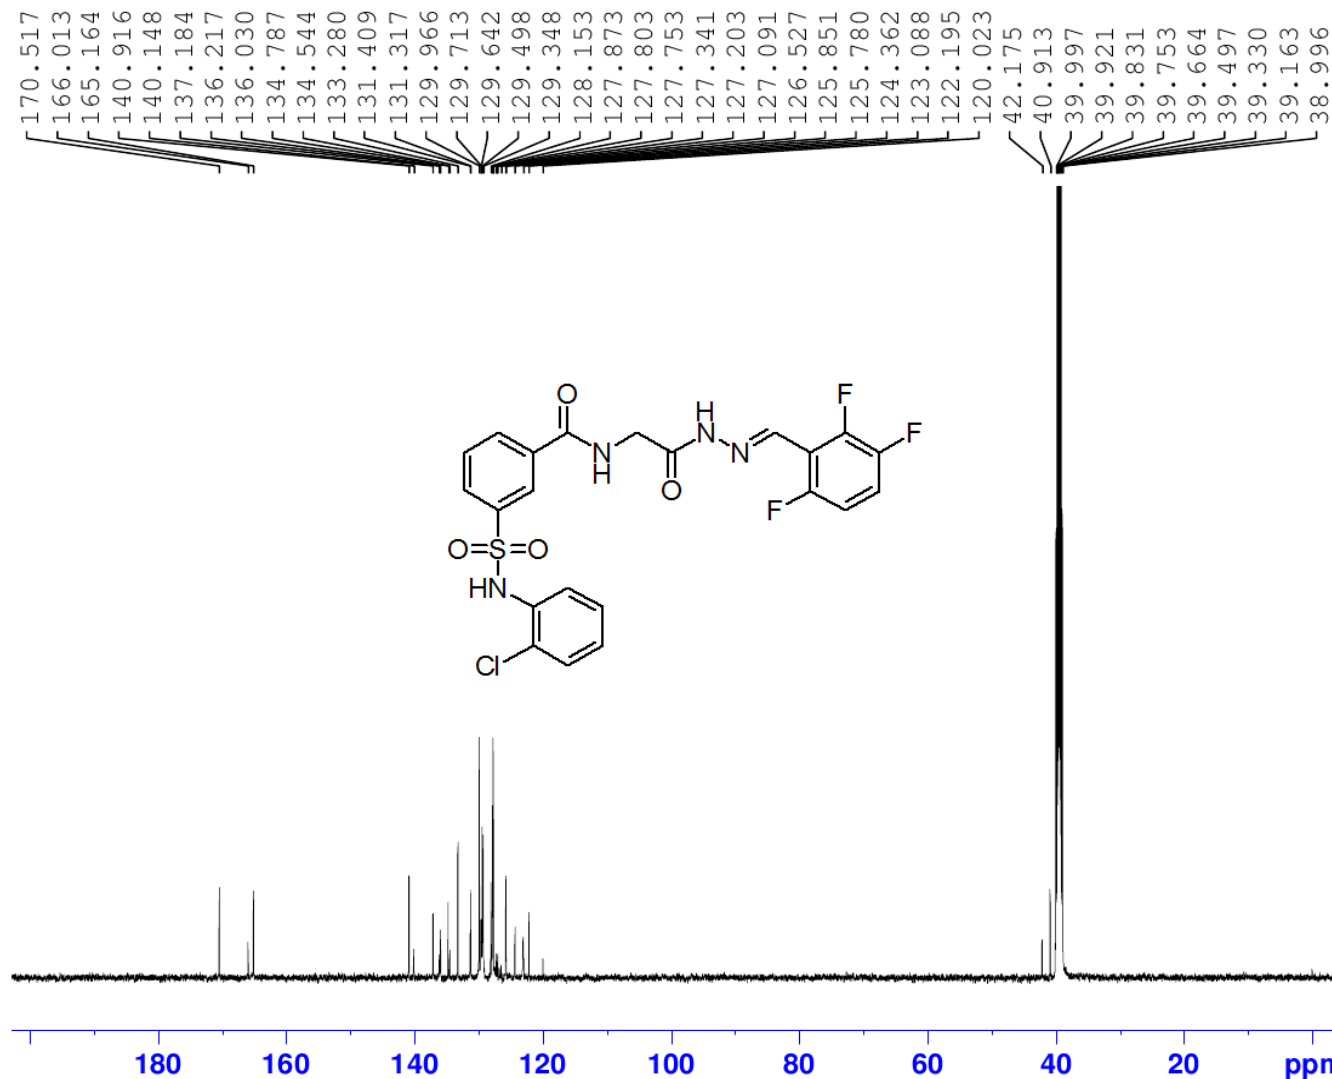

Current Data Parameters  
 NAME 511611B1541  
 EXPNO 2  
 PROCNO 1

F2 - Acquisition Parameters  
 Date\_ 20161116  
 Time 0.40 h  
 INSTRUM spect  
 PROBHD Z119470\_0231  
 PULPROG zgpg30  
 TD 65536  
 SOLVENT DMSO  
 NS 1024  
 DS 4  
 SWH 29761.904 Hz  
 FIDRES 0.908261 Hz  
 AQ 1.1010048 sec  
 RG 197.72  
 DW 16.800 usec  
 DE 6.50 usec  
 TE 298.1 K  
 D1 3.00000000 sec  
 D11 0.03000000 sec  
 TD0 1  
 SFO1 125.7703643 MHz  
 NUC1 13C  
 P1 9.50 usec  
 PLW1 88.00000000 W  
 SFO2 500.1320005 MHz  
 NUC2 1H  
 CPDPRG[2] waltz16  
 PCPD2 80.00 usec  
 PLW2 23.00000000 W  
 PLW12 0.27515000 W  
 PLW13 0.13840000 W

F2 - Processing parameters  
 SI 32768  
 SF 125.7578492 MHz  
 WDW EM  
 SSB 0  
 LB 2.00 Hz  
 GB 0  
 PC 1.40

<sup>13</sup>CNMR of Compound-1t in DMSO-d<sub>6</sub>

## Elemental Composition Report

Page 1

### Single Mass Analysis

Tolerance = 1000.0 PPM / DBE: min = -1.5, max = 50.0

Selected filters: None

Monoisotopic Mass, Even Electron Ions

389 formula(e) evaluated with 1 results within limits (up to 1 best isotopic matches for each mass)

Elements Used:

C: 0-22 H: 0-17 N: 0-4 O: 0-4 F: 0-3 S: 0-1 Cl: 0-1

GVB-SA12

511611B8157 12 (0.164) AM (Top,4, Ar,5000.0,195.16,1.00,LS 10); Sm (Mn, 2x1.00); Sb (1,40.00)

1: TOF MS ES+  
6.08e3

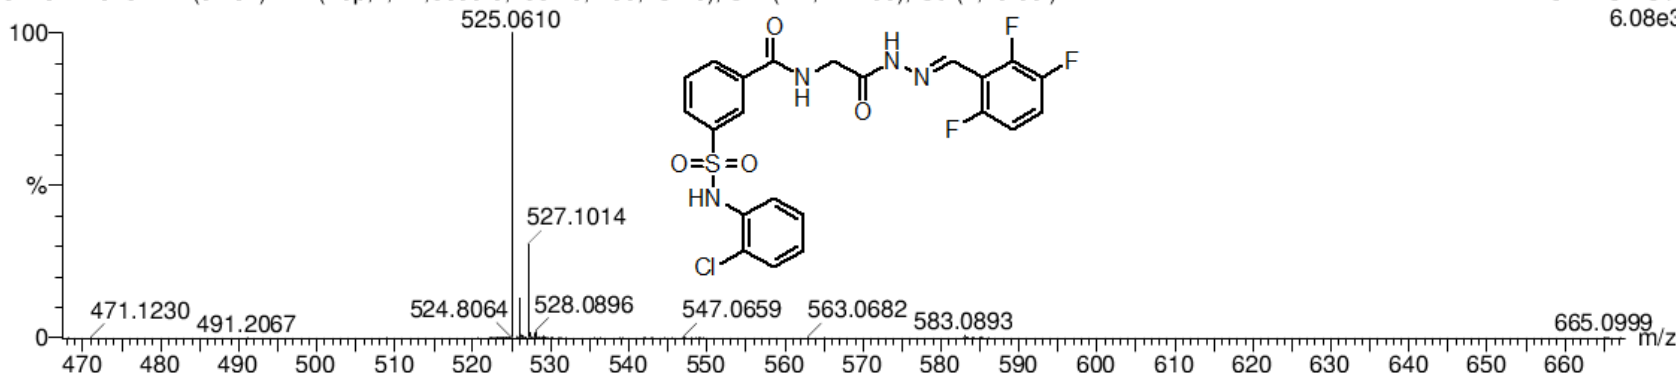

Minimum: -1.5  
Maximum: 5.0 1000.0 50.0

| Mass     | Calc. Mass | mDa  | PPM  | DBE  | i-FIT | Formula               |
|----------|------------|------|------|------|-------|-----------------------|
| 525.0610 | 525.0611   | -0.1 | -0.2 | 14.5 | 349.2 | C22 H17 N4 O4 F3 S Cl |

HRMS of Compound-1t



GVB-SA03  
 Reference Code: 511611A0300  
 Solvent: dms  
 Archive directory:  
 /home/gvkbio/data/2016/Nov  
 Agilent 400-MRDD  
 Data collected on: Nov 14 2016  
 Experiment: PROTON

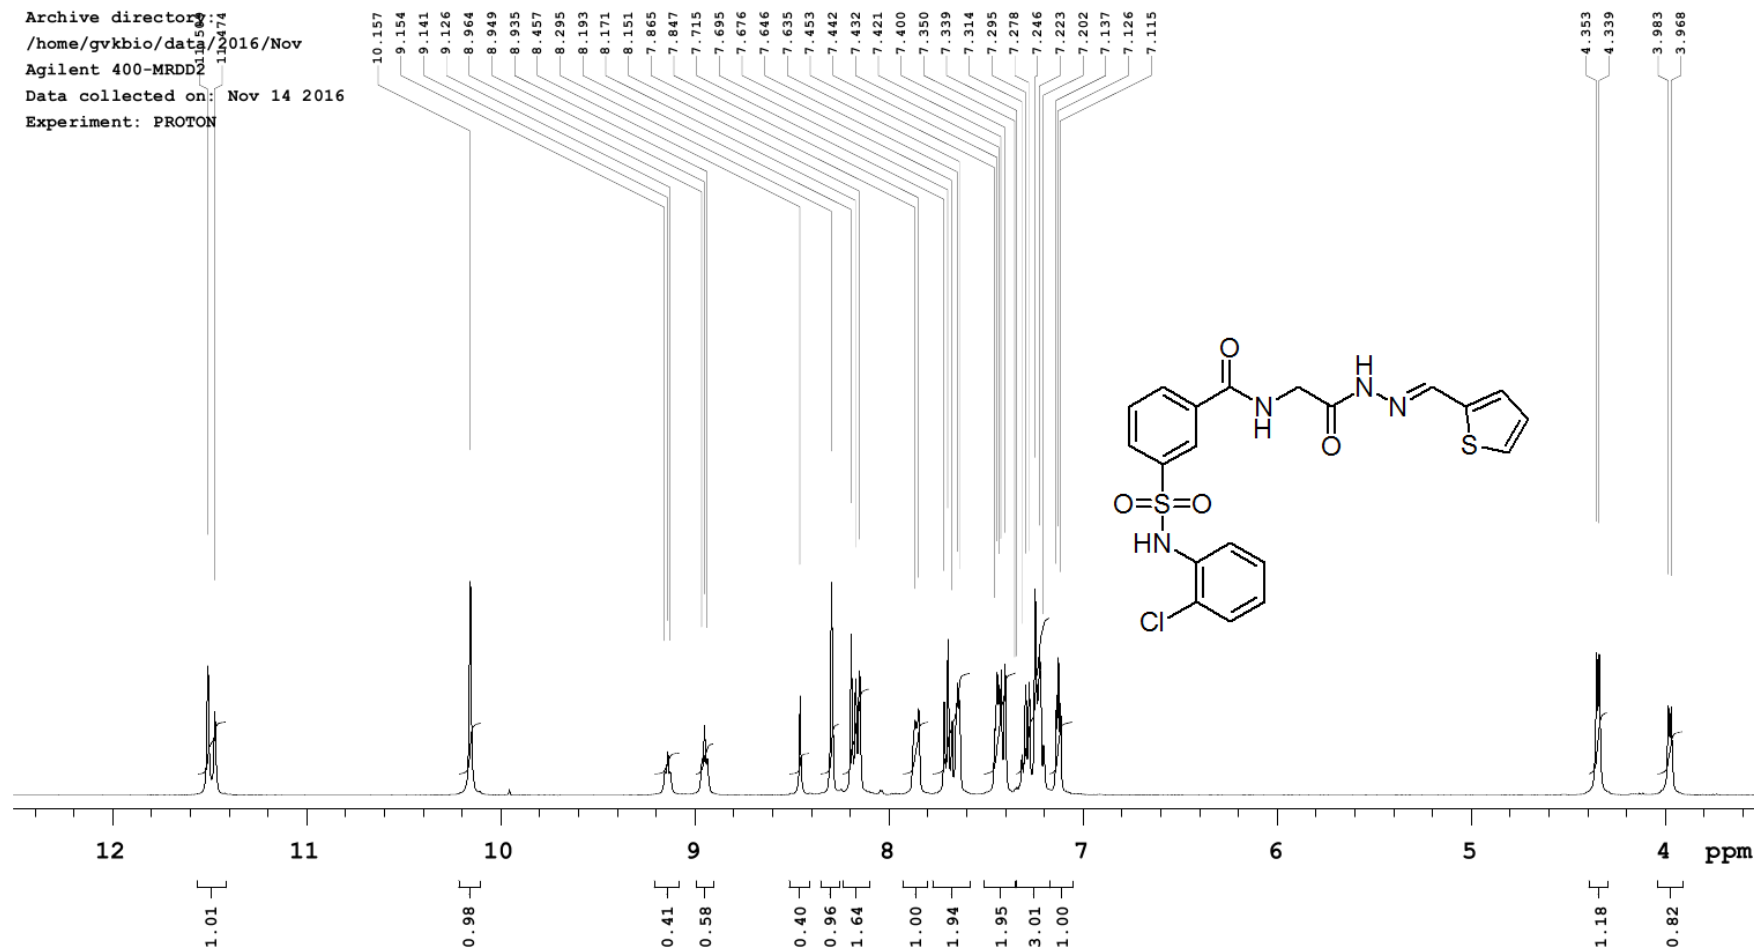

<sup>1</sup>H NMR of **Compound-1u** in DMSO-d<sub>6</sub>

GVB-SA03

Reference Code: 511611A0300

Solvent: dmsc

Archive directory

/home/gvxbip/data/2016/Nov

Agilent 400-MRDB2

Data collected on: Nov 12 2016

Experiment: CARBON

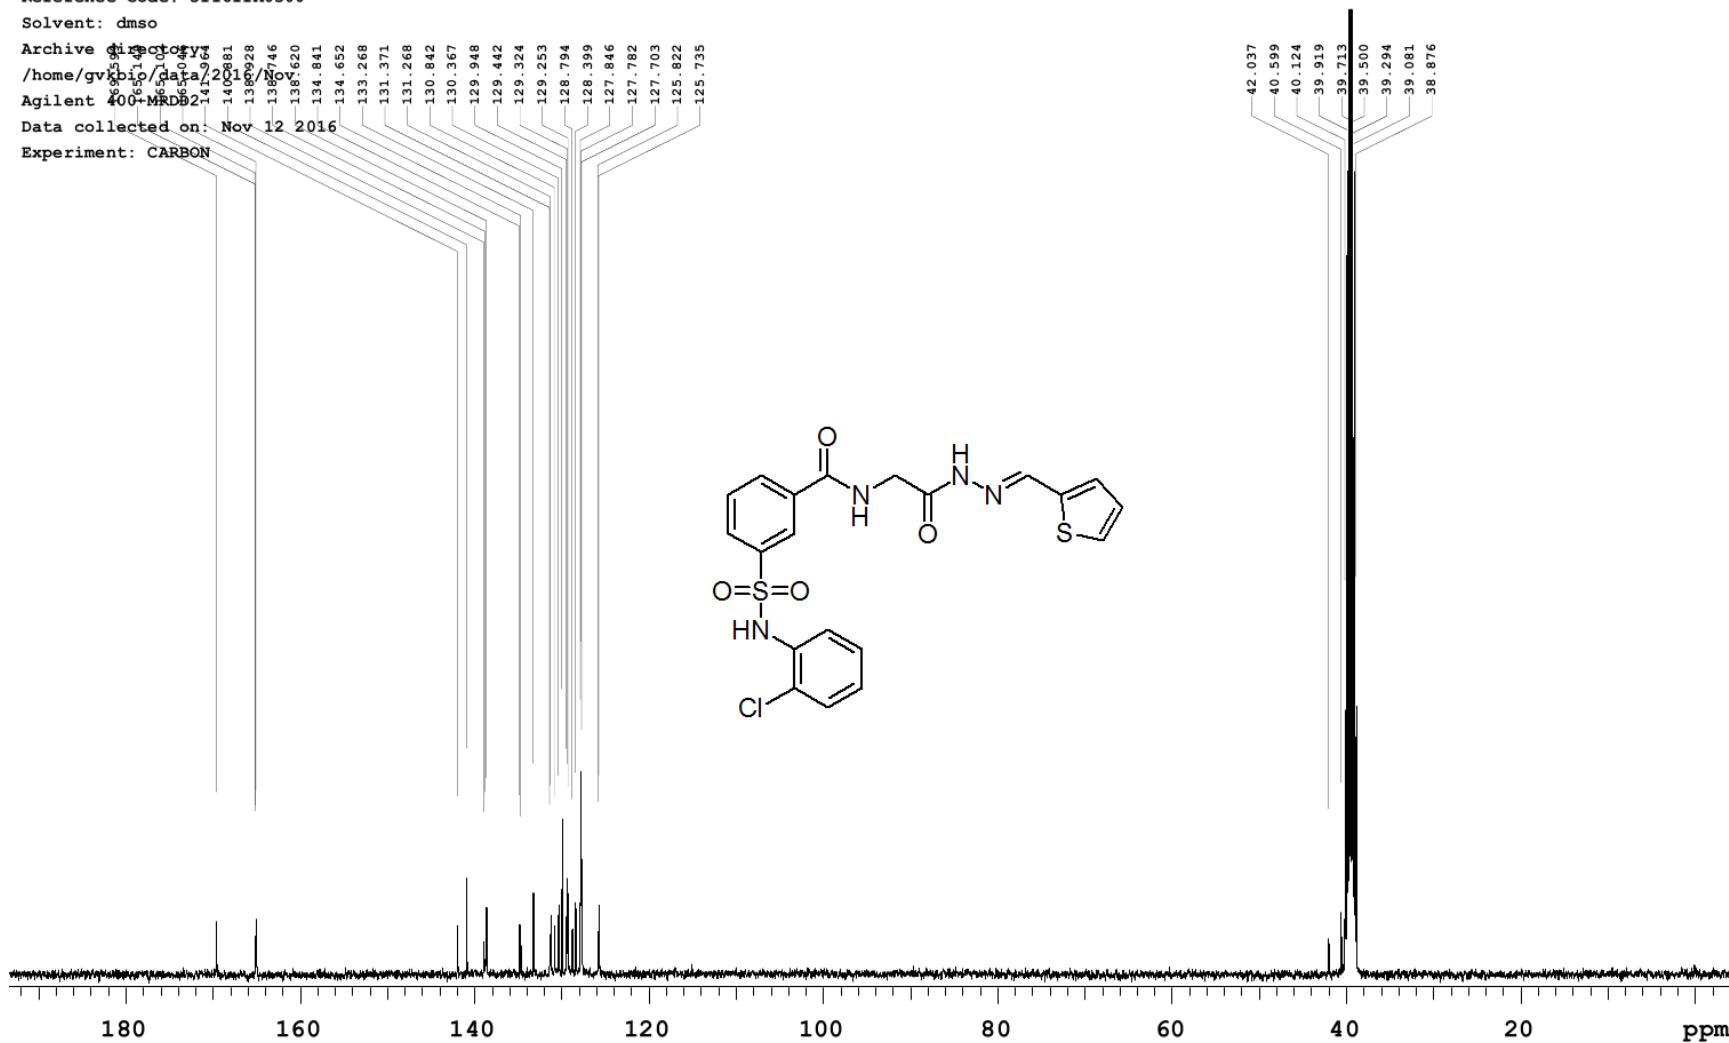

## Elemental Composition Report

Page 1

### Single Mass Analysis

Tolerance = 10000.0 PPM / DBE: min = -1.5, max = 50.0

Selected filters: None

Monoisotopic Mass, Even Electron Ions

143 formula(e) evaluated with 1 results within limits (up to 1 closest results for each mass)

Elements Used:

C: 0-20 H: 0-18 N: 0-4 O: 0-4 S: 0-2 Cl: 0-1

GVB-SA03

511611B4317 25 (0.362) AM (Top,4, Ar,5000.0,195.15,1.00,LS 10); Sm (Mn, 2x1.00); Sb (1,40.00)

1: TOF MS ES+  
1.29e3

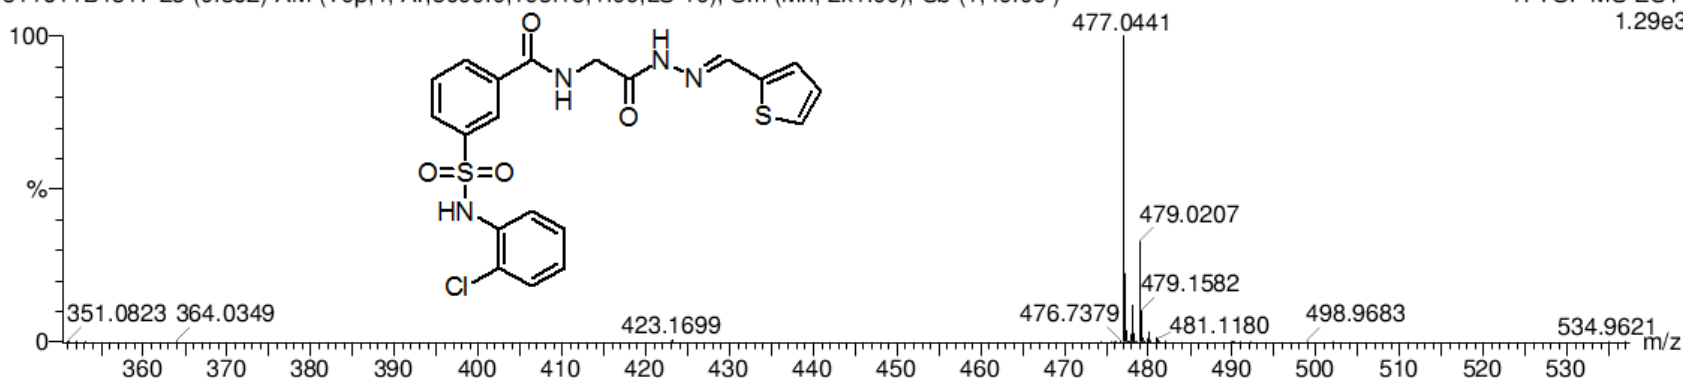

Minimum: -1.5  
Maximum: 5.0 10000.0 50.0

| Mass     | Calc. Mass | mDa  | PPM  | DBE  | i-FIT   | Formula             |
|----------|------------|------|------|------|---------|---------------------|
| 477.0441 | 477.0458   | -1.7 | -3.6 | 13.5 | 78957.8 | C20 H18 N4 O4 S2 Cl |

HRMS of Compound-1u

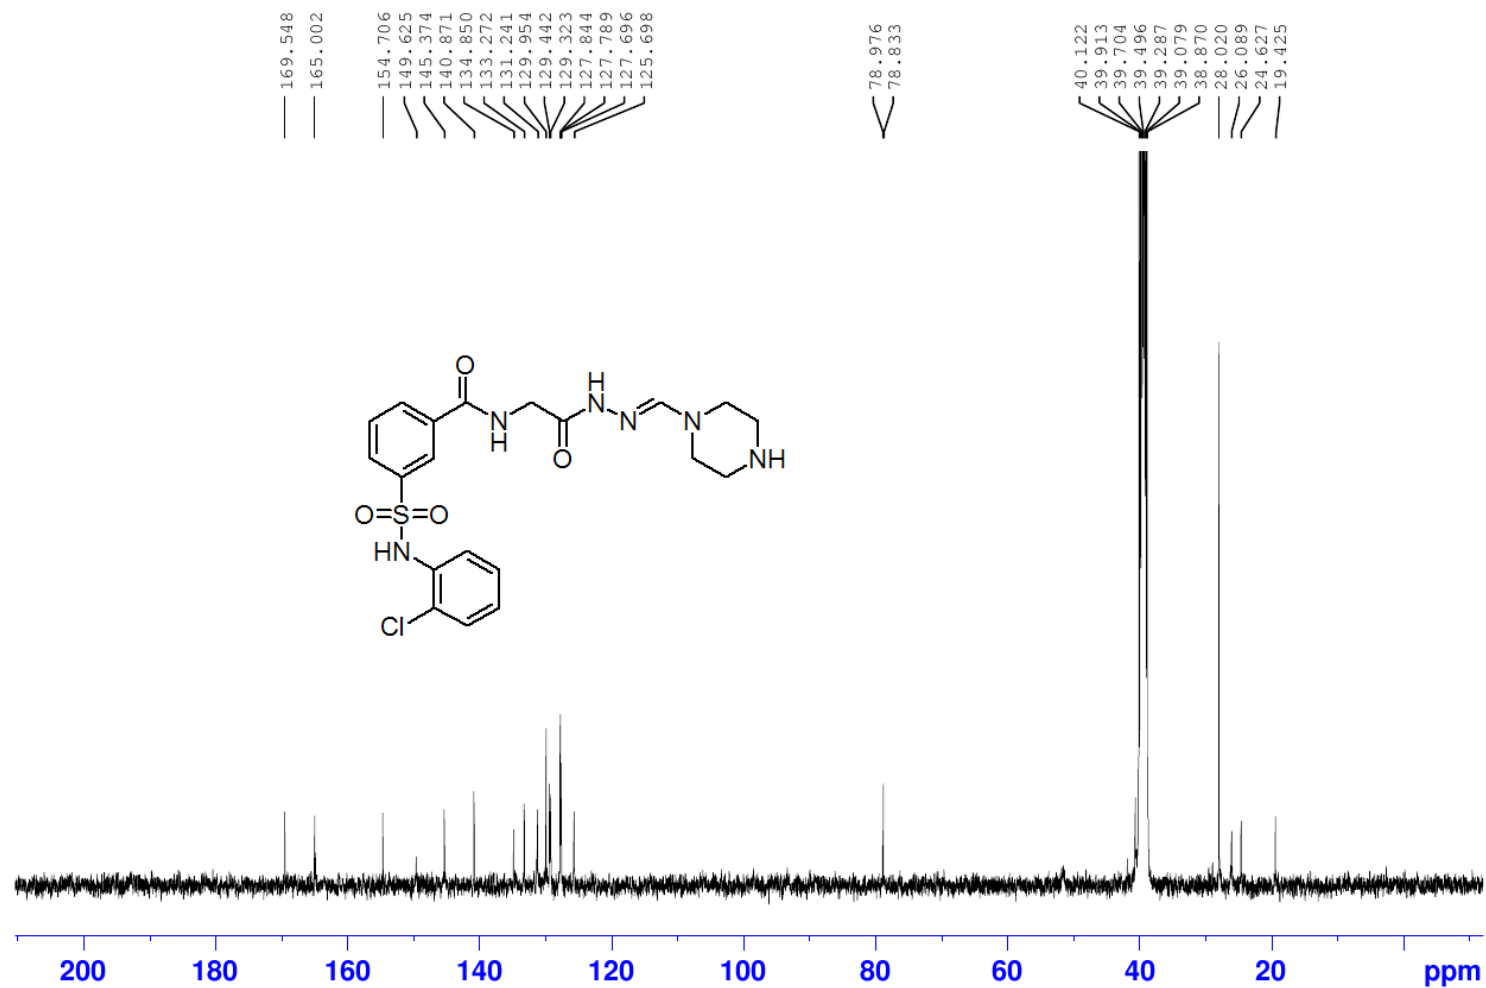

Current Data Parameters  
NAME 511611C7426  
EXPNO 2  
PROCNO 1

F2 - Acquisition Parameters  
Date\_ 20161201  
Time 3.01  
INSTRUM spect  
PROBHD 5 mm PABBO BB/  
PULPROG zgpg30  
TD 65536  
SOLVENT DMSO  
NS 1024  
DS 4  
SWH 24038.461 Hz  
FIDRES 0.366798 Hz  
AQ 1.3631488 sec  
RG 195.29  
DW 20.800 usec  
DE 6.50 usec  
TE 298.8 K  
D1 3.00000000 sec  
D11 0.03000000 sec  
TD0 1

===== CHANNEL f1 =====  
SFO1 100.6228293 MHz  
NUC1 13C  
P1 10.00 usec  
PLW1 78.00000000 W

===== CHANNEL f2 =====  
SFO2 400.1316005 MHz  
NUC2 1H  
CPDPRG[2] waltz16  
PCPD2 90.00 usec  
PLW2 16.00000000 W  
PLW12 0.18777999 W  
PLW13 0.15210000 W

F2 - Processing parameters  
SI 32768  
SF 100.6128192 MHz  
WDW EM  
SSB 0  
LB 2.00 Hz  
GB 0  
PC 1.40

ANL-MCL5-NMR-001

<sup>13</sup>CNMR of Compound-1v in DMSO-*d*<sub>6</sub>

## Elemental Composition Report

Page 1

### Single Mass Analysis

Tolerance = 1000.0 PPM / DBE: min = -1.5, max = 50.0

Selected filters: None

Monoisotopic Mass, Odd and Even Electron Ions

133 formula(e) evaluated with 1 results within limits (up to 1 best isotopic matches for each mass)

Elements Used:

C: 0-20 H: 0-23 N: 0-6 O: 0-4 S: 0-1 Cl: 0-1

GVB-SA10

511611B8154 12 (0.143) AM (Top,4, Ar,5000.0,195.17,1.00,LS 10); Sm (Mn, 2x1.00); Sb (1,40.00)

1: TOF MS ES+  
4.03e3

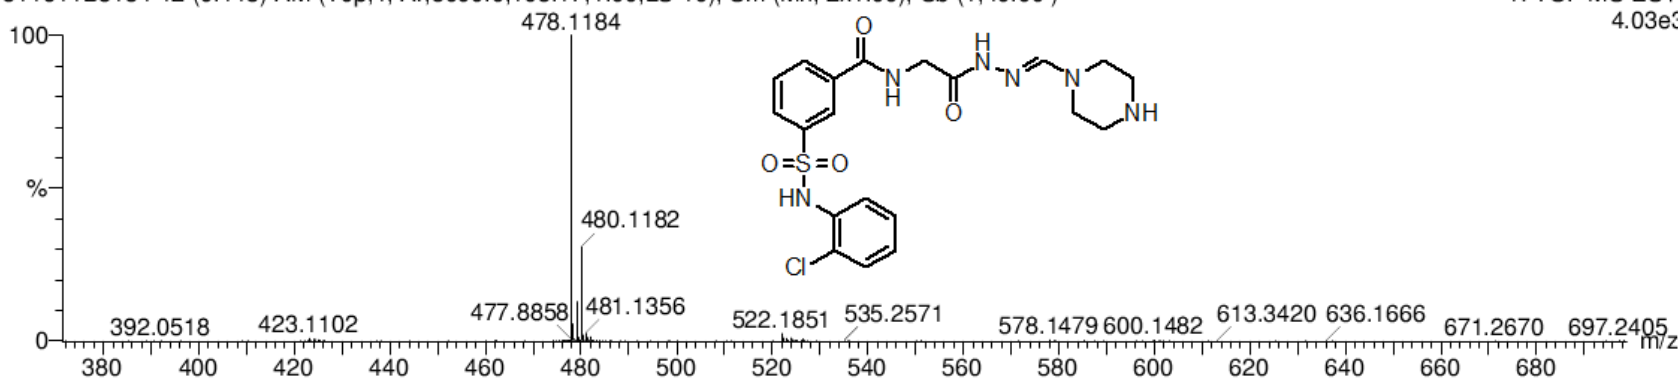

Minimum: -1.5  
Maximum: 5.0 1000.0 50.0

| Mass     | Calc. Mass | mDa  | PPM  | DBE  | i-FIT | Formula            |
|----------|------------|------|------|------|-------|--------------------|
| 478.1184 | 478.1190   | -0.6 | -1.3 | 12.0 | 181.7 | C20 H23 N6 O4 S Cl |

HRMS of Compound-1v

GVB-SA14  
Reference Code: 511611B2466  
Solvent: dms  
Archive directory:  
/home/gvkbio/data/2016/Nov  
Agilent 400-MRDD2  
Data collected on: Nov 18 2016  
Experiment: PROTON

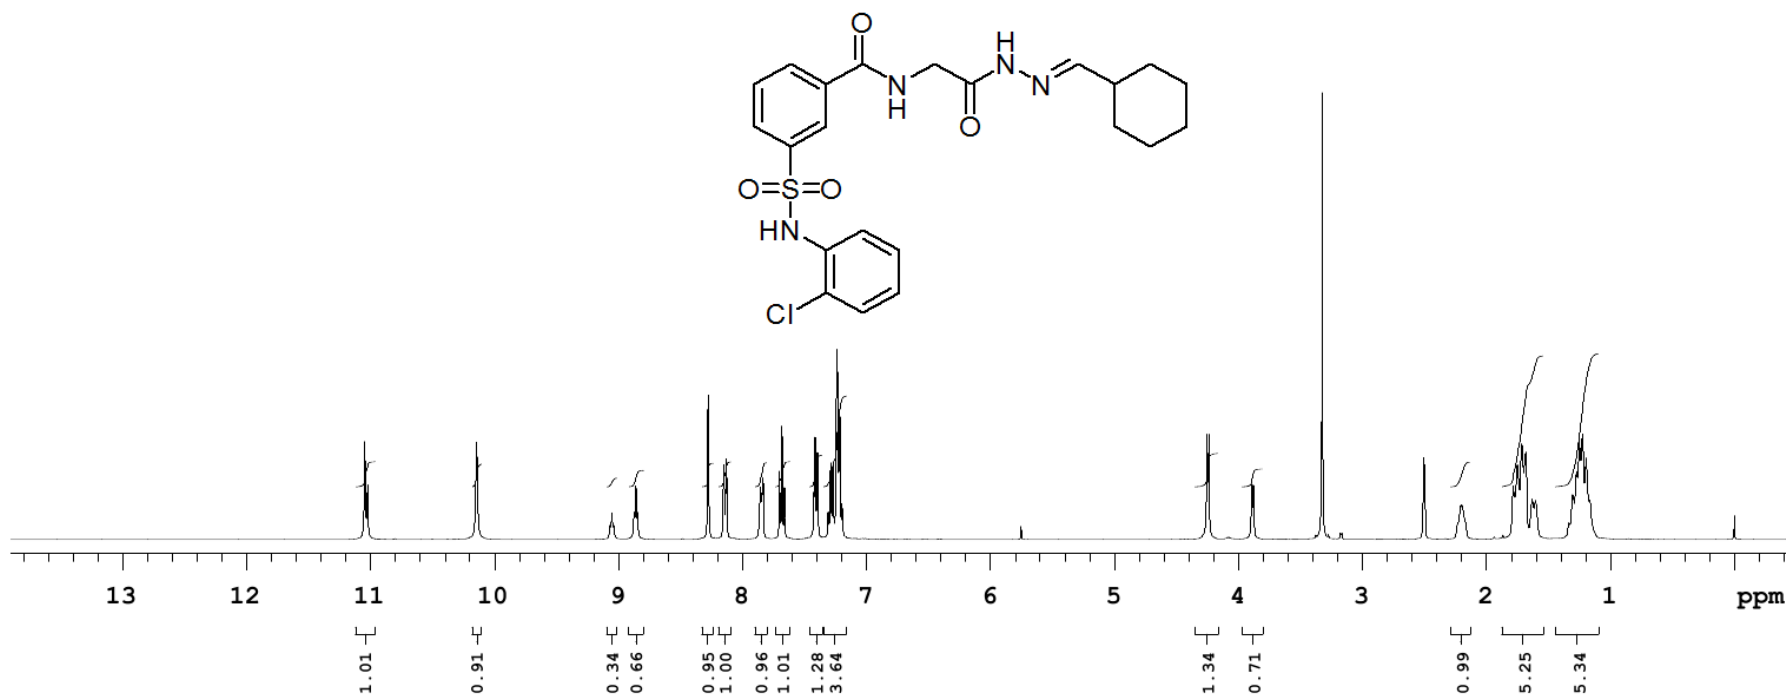

<sup>1</sup>H NMR of **Compound-1w** in DMSO-d<sub>6</sub>

GVB-SA14  
 Reference Code: 511611B2466  
 Solvent: dmsd  
 Archive directory:  
 /home/gvkbio/data/2016/Nov  
 Agilent 400-MRDD2  
 Data collected on: Nov 18 2016  
 Experiment: CARBON

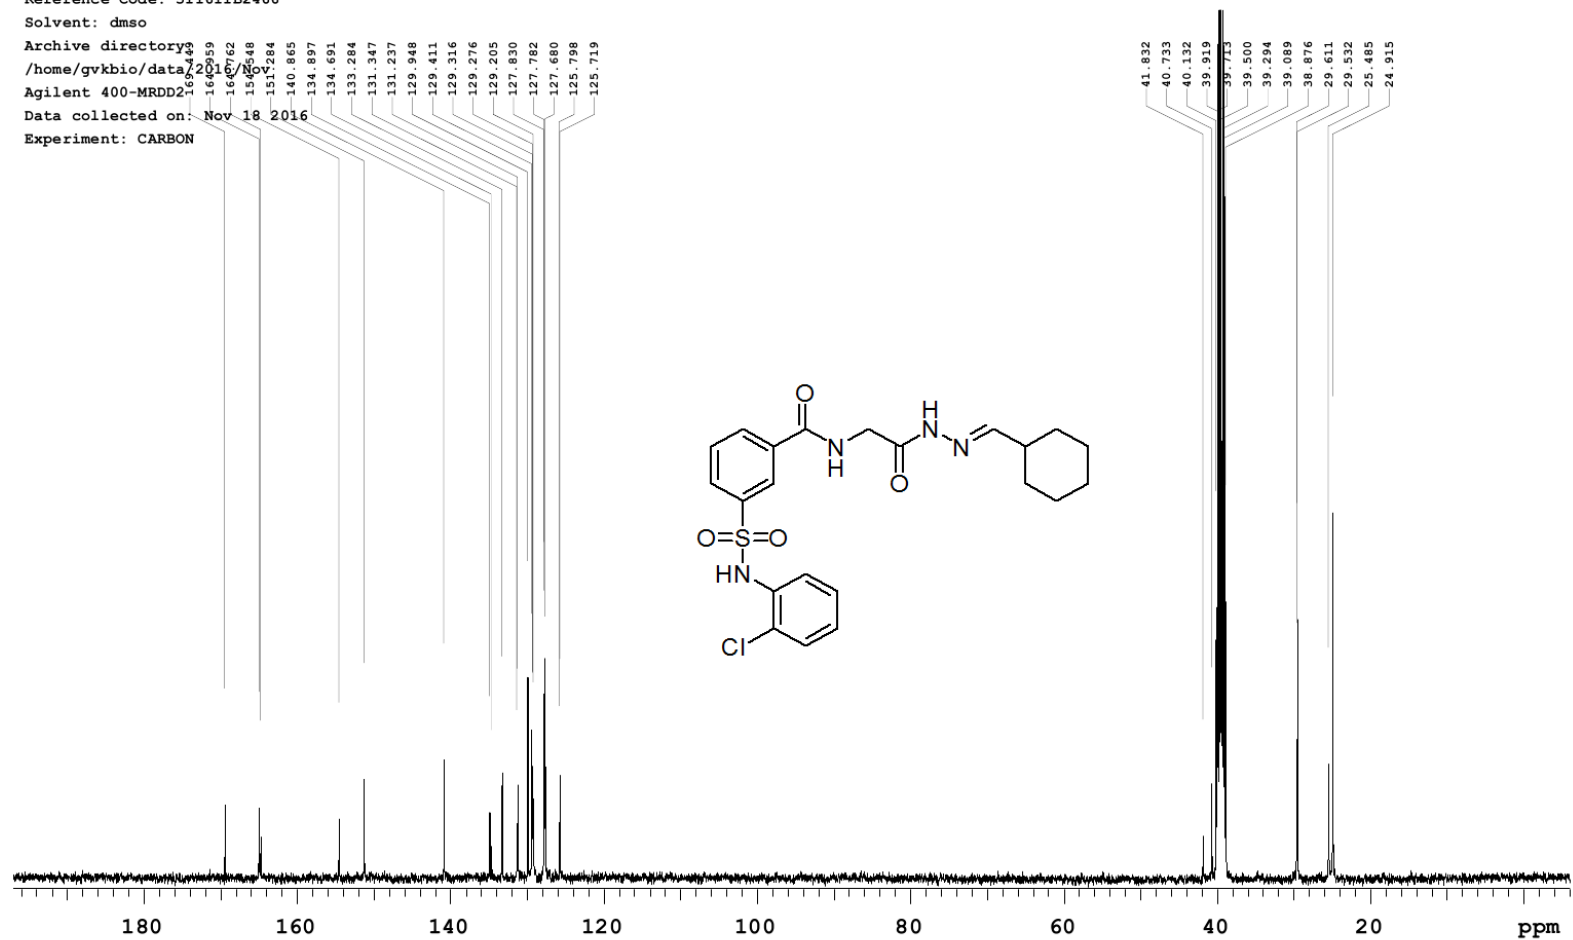

$^{13}\text{C}$ NMR of **Compound-1w** in  $\text{DMSO-}d_6$

## Elemental Composition Report

Page 1

### Single Mass Analysis

Tolerance = 1000.0 PPM / DBE: min = -1.5, max = 50.0

Selected filters: None

Monoisotopic Mass, Even Electron Ions

94 formula(e) evaluated with 1 results within limits (up to 1 best isotopic matches for each mass)

Elements Used:

C: 0-22 H: 0-26 N: 0-4 O: 0-4 S: 0-1 Cl: 0-1

GVB-SA14

511611B8161 15 (0.228) AM (Top,4, Ar,5000.0,195.18,1.00,LS 10); Sm (Mn, 2x1.00); Sb (1,40.00)

1: TOF MS ES+  
6.14e3

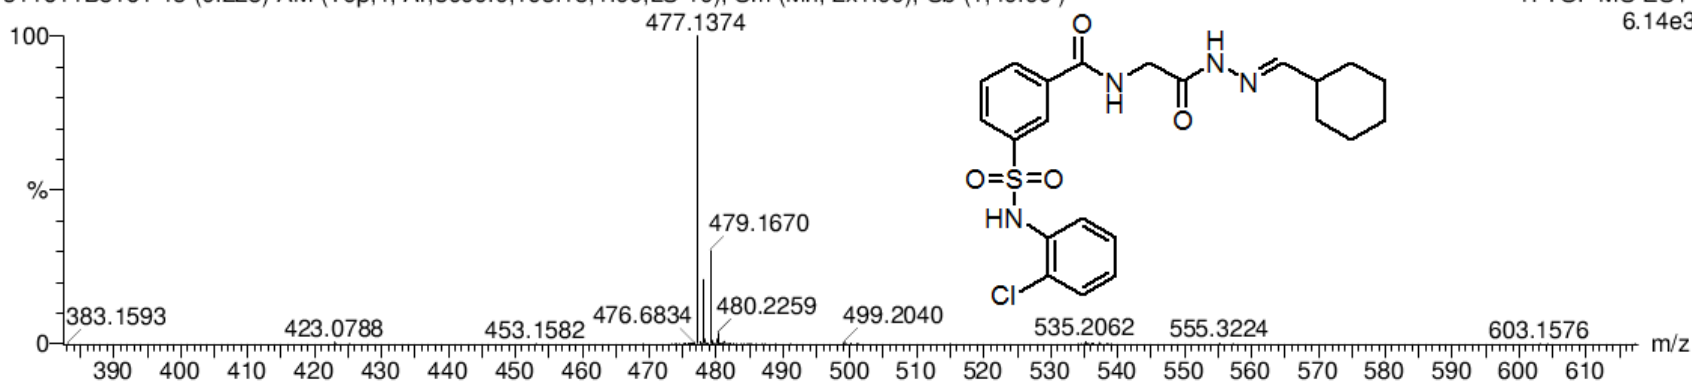

Minimum: -1.5  
Maximum: 5.0 1000.0 50.0

| Mass     | Calc. Mass | mDa | PPM | DBE  | i-FIT | Formula            |
|----------|------------|-----|-----|------|-------|--------------------|
| 477.1374 | 477.1363   | 1.1 | 2.3 | 11.5 | 132.3 | C22 H26 N4 O4 S Cl |

HRMS of Compound-1w



GVB-SK-31

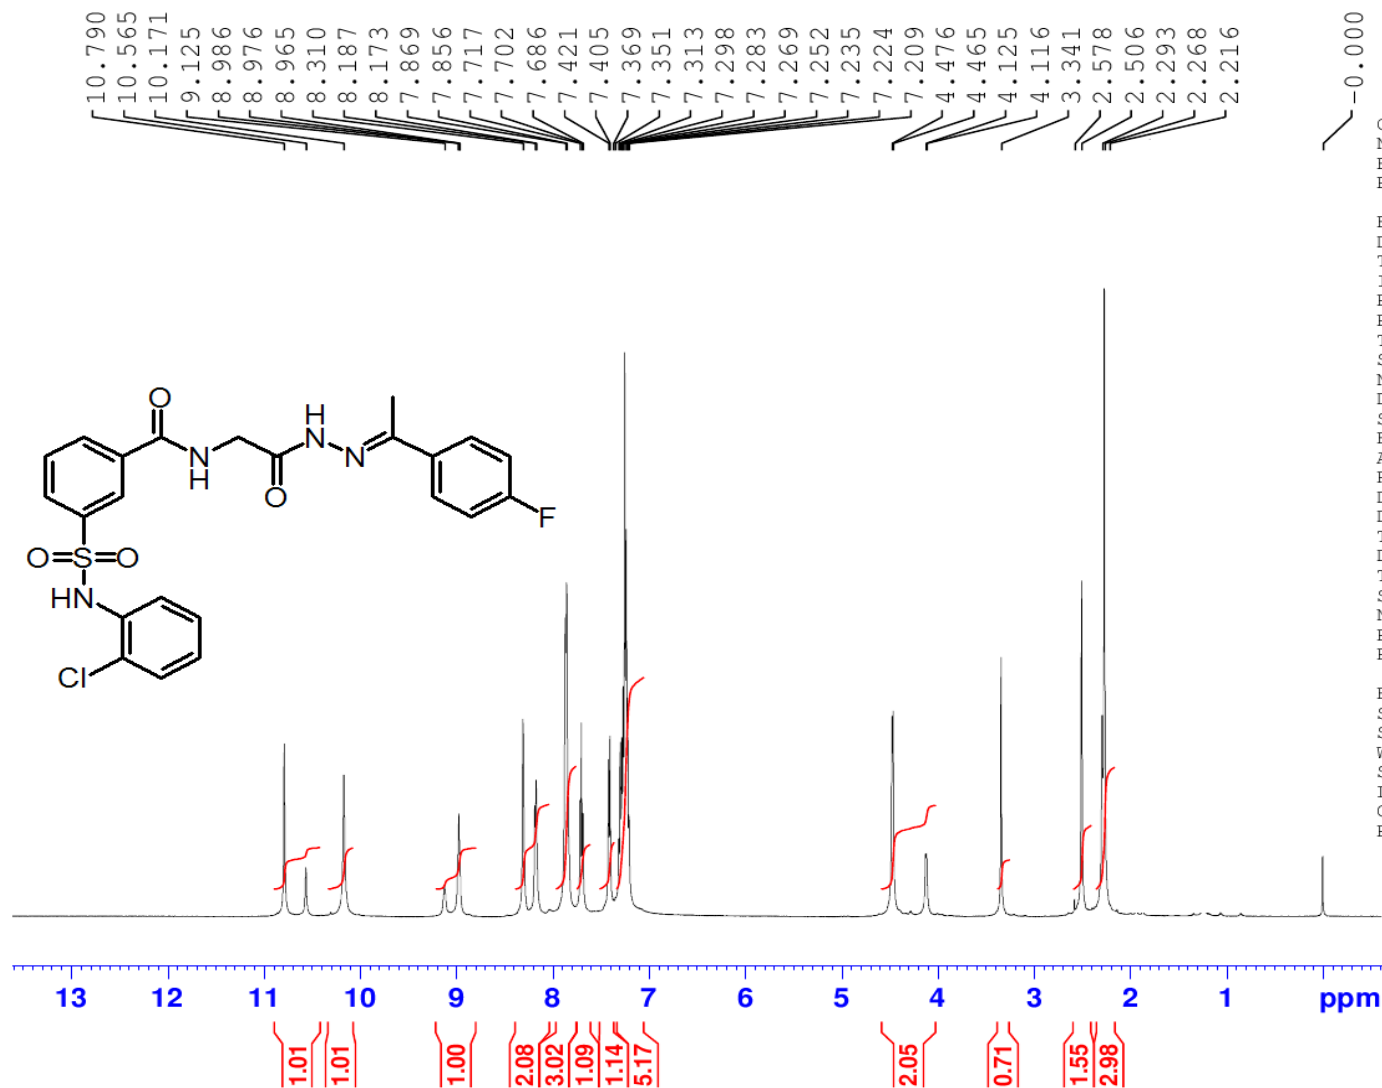

Current Data Parameters  
 NAME 511612B0598  
 EXPNO 1  
 PROCNO 1

F2 - Acquisition Parameters  
 Date\_ 20170103  
 Time 20.54 h  
 INSTRUM spect  
 PROBHD Z119470\_0231  
 PULPROG zg30  
 TD 65536  
 SOLVENT DMSO  
 NS 8  
 DS 0  
 SWH 10000.000 Hz  
 FIDRES 0.305176 Hz  
 AQ 3.2767999 sec  
 RG 89.27  
 DW 50.000 usec  
 DE 6.50 usec  
 TE 298.1 K  
 D1 1.00000000 sec  
 TD0 1  
 SFO1 500.1330885 MHz  
 NUC1 1H  
 P1 8.75 usec  
 PLW1 23.00000000 W

F2 - Processing parameters  
 SI 65536  
 SF 500.1300011 MHz  
 WDW EM  
 SSB 0  
 LB 0.30 Hz  
 GB 0  
 PC 1.00

<sup>1</sup>H NMR of Compound-2a in DMSO-d<sub>6</sub>

GVB-SK-31

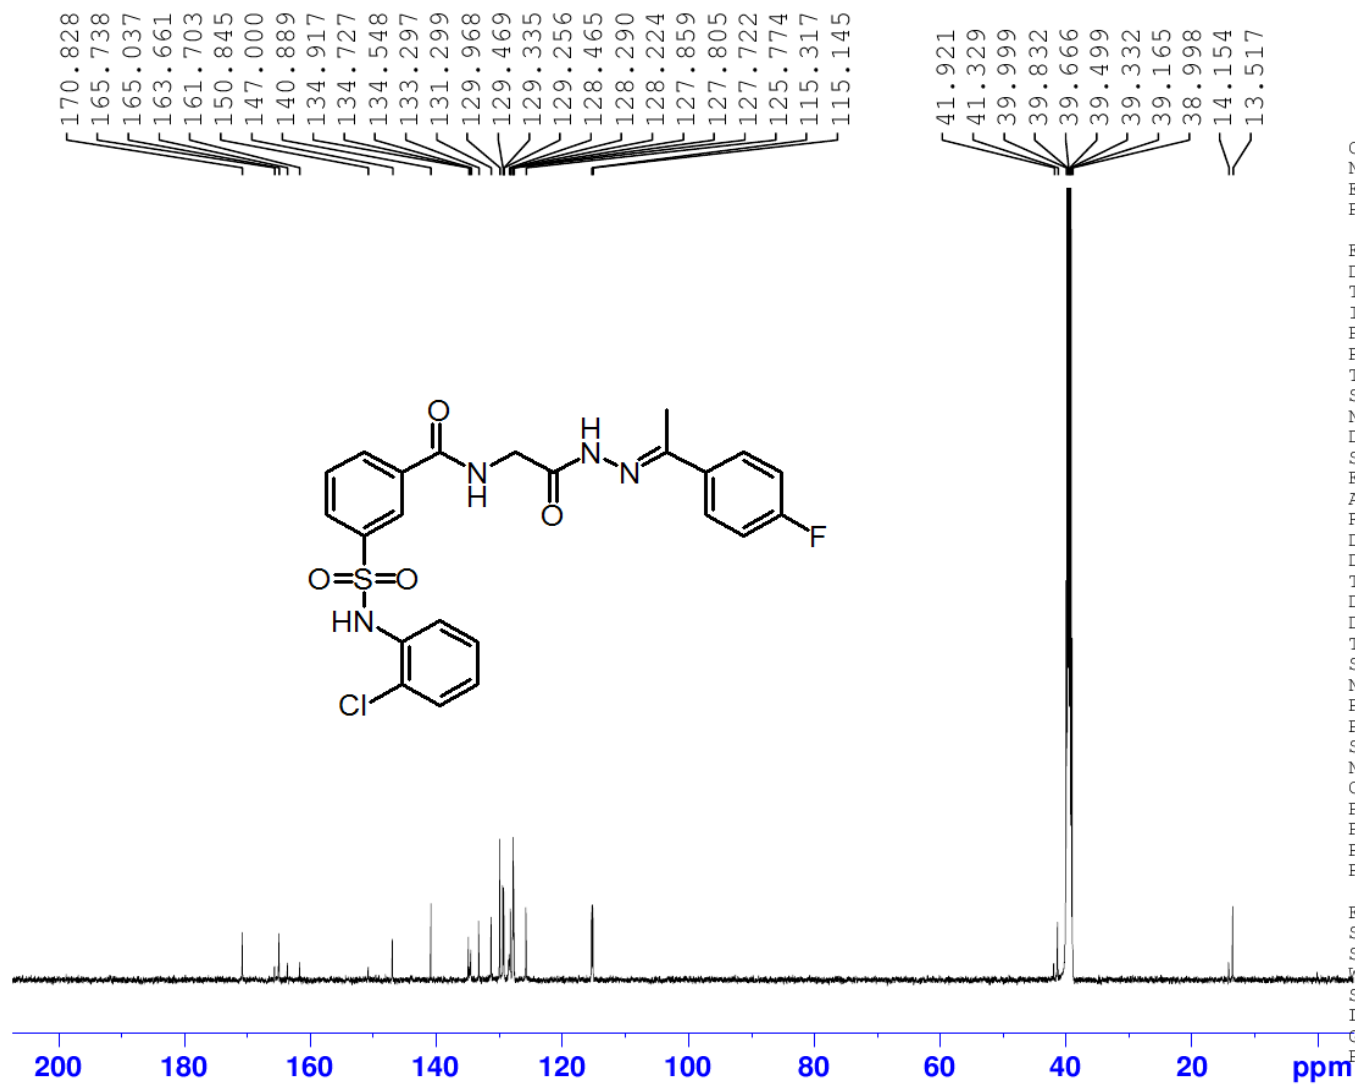

Current Data Parameters  
 NAME 511612B0598  
 EXPNO 2  
 PROCNO 1

F2 - Acquisition Parameters  
 Date\_ 20170104  
 Time 1.16 h  
 INSTRUM spect  
 PROBHD z119470\_0231 (  
 PULPROG zgpg30  
 TD 65536  
 SOLVENT DMSO  
 NS 1024  
 DS 4  
 SWH 29761.904 Hz  
 FIDRES 0.908261 Hz  
 AQ 1.1010048 sec  
 RG 197.72  
 DW 16.800 usec  
 DE 6.50 usec  
 TE 298.5 K  
 D1 3.00000000 sec  
 D11 0.03000000 sec  
 TD0 1  
 SFO1 125.7703643 MHz  
 NUC1 13C  
 P1 9.50 usec  
 PLW1 88.00000000 W  
 SFO2 500.1320005 MHz  
 NUC2 1H  
 CPDPRG[2] waltz16  
 PCPD2 80.00 usec  
 PLW2 23.00000000 W  
 PLW12 0.27515000 W  
 PLW13 0.13840000 W

F2 - Processing parameters  
 SI 32768  
 SF 125.7578505 MHz  
 WDW EM  
 SSB 0  
 LB 2.00 Hz  
 GB 0  
 PC 1.40

<sup>13</sup>CNMR of Compound-2a in DMSO-d<sub>6</sub>

## Elemental Composition Report

Page 1

### Single Mass Analysis

Tolerance = 1000.0 PPM / DBE: min = -1.5, max = 50.0

Selected filters: None

Monoisotopic Mass, Even Electron Ions

190 formula(e) evaluated with 1 results within limits (up to 1 closest results for each mass)

Elements Used:

C: 0-23 H: 0-21 N: 0-4 O: 0-4 F: 0-1 S: 0-1 Cl: 0-1

SAMPLE CODE: COMPOUND-31

511701A5143 61 (0.882) AM (Cen,4, 80.00, Ar,5000.0,195.13,1.00,LS 5); Sm (SG, 2x1.00); Sb (1,40.00)

1: TOF MS ES+  
94.7

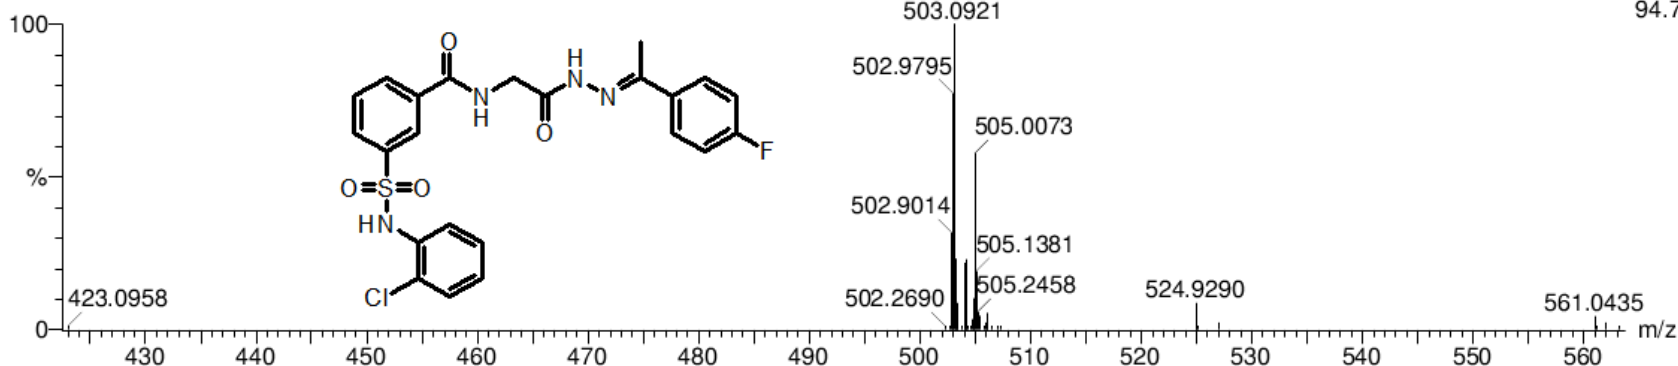

Minimum: -1.5

Maximum: 5.0 1000.0 50.0

| Mass     | Calc. Mass | mDa  | PPM  | DBE  | i-FIT | Formula              |
|----------|------------|------|------|------|-------|----------------------|
| 503.0921 | 503.0956   | -3.5 | -7.0 | 14.5 | 7.9   | C23 H21 N4 O4 F S Cl |

HRMS of Compound-2a

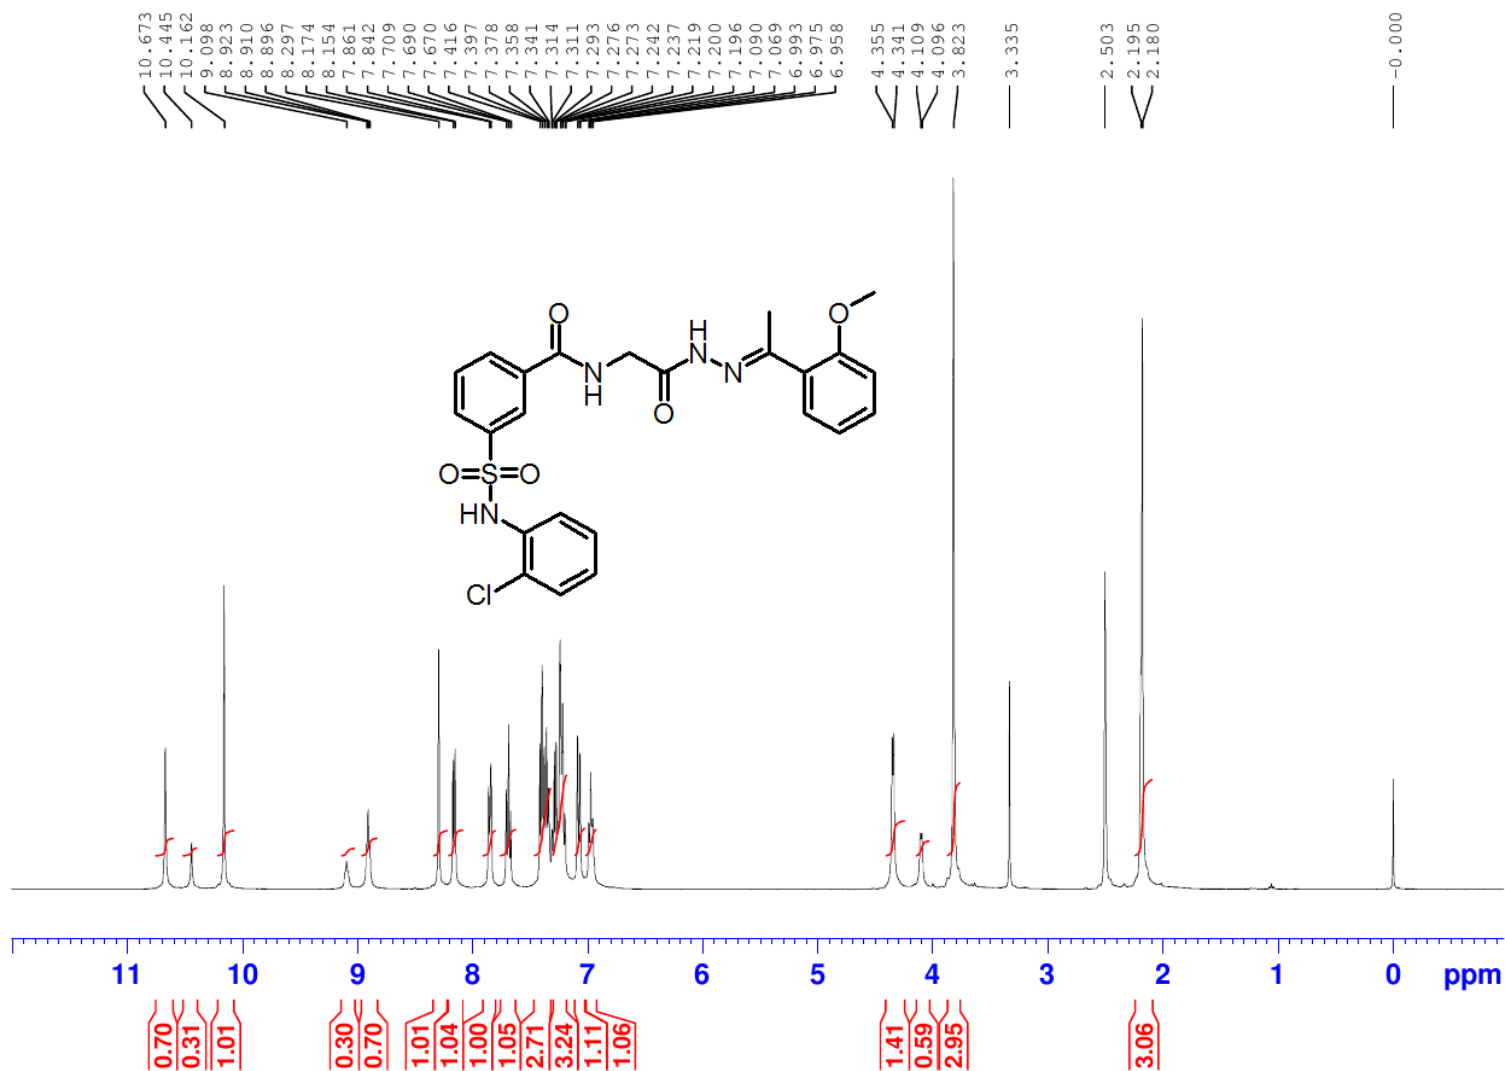

Current Data Parameters  
NAME 511612B0599  
EXPNO 1  
PROCNO 1

F2 - Acquisition Parameters  
Date\_ 20170103  
Time 21.00  
INSTRUM spect  
PROBHD 5 mm PABBO BB/  
PULPROG zg30  
TD 65536  
SOLVENT DMSO  
NS 16  
DS 2  
SWH 8012.820 Hz  
FIDRES 0.122266 Hz  
AQ 4.0894465 sec  
RG 86.08  
DW 62.400 usec  
DE 6.50 usec  
TE 298.1 K  
D1 1.00000000 sec  
TD0 1

===== CHANNEL f1 =====  
SFO1 400.1324710 MHz  
NUC1 1H  
P1 9.75 usec  
PLW1 16.00000000 W

F2 - Processing parameters  
SI 65536  
SF 400.1300015 MHz  
WDW EM  
SSB 0  
LB 0.30 Hz  
GB 0  
PC 1.00

ANL-MCL5-NMR-001

<sup>1</sup>H NMR of **Compound-2b** in DMSO-d<sub>6</sub>

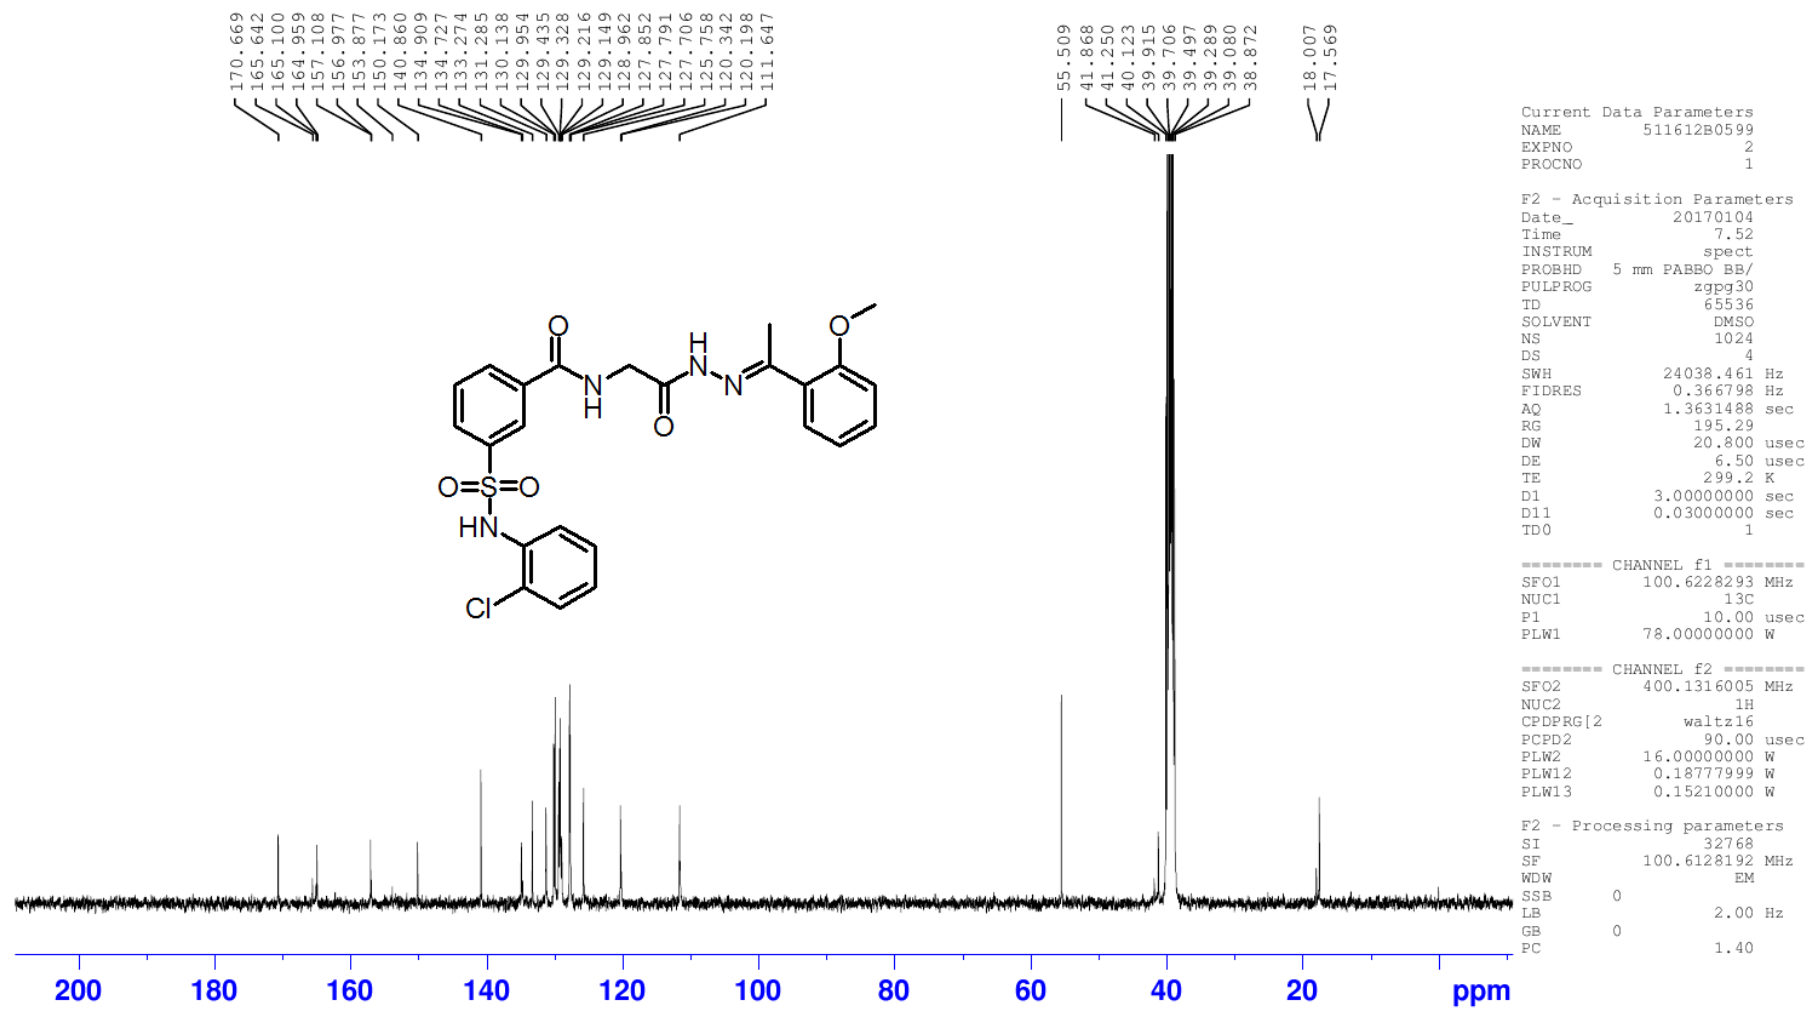

ANL-MCL5-NMR-001

<sup>13</sup>CNMR of **Compound-2b** in DMSO-d<sub>6</sub>

## Elemental Composition Report

Page 1

### Single Mass Analysis

Tolerance = 1000.0 PPM / DBE: min = -1.5, max = 50.0

Selected filters: None

Monoisotopic Mass, Even Electron Ions

199 formula(e) evaluated with 69 results within limits (up to 1 closest results for each mass)

Elements Used:

C: 0-29 H: 0-25 N: 0-4 O: 0-5 F: 0-1 S: 0-1 Cl: 0-1

SAMPLE CODE: COMPOUND-32

511701A5129 36 (0.533) AM (Top,4, Ar,5000.0,195.18,1.00,LS 5); Sm (Mn, 1x1.00); Sb (1,40.00)

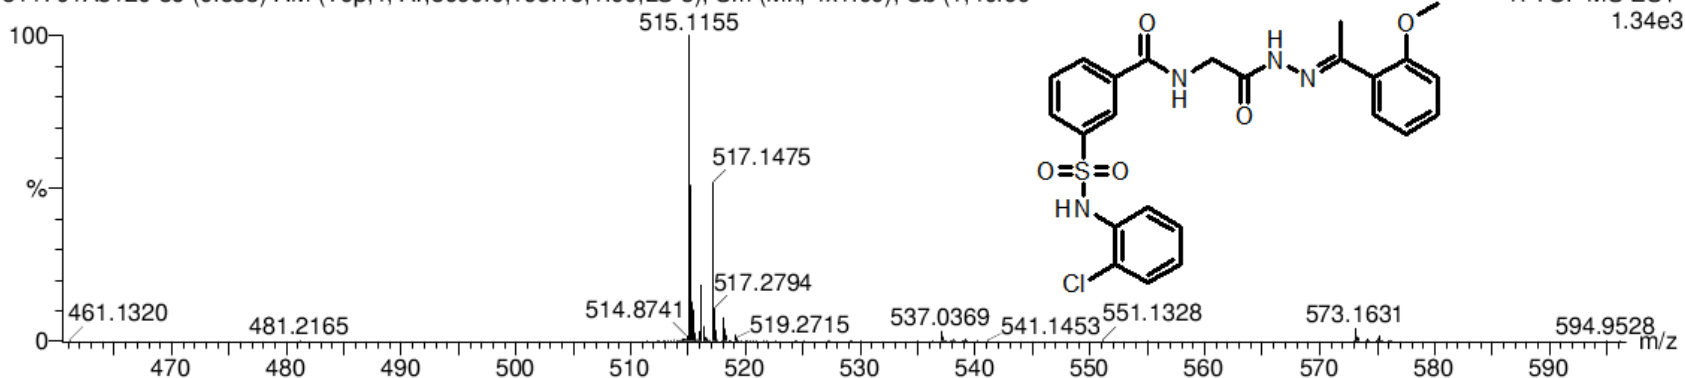

Minimum: -1.5  
Maximum: 5.0 1000.0 50.0

| Mass     | Calc. Mass | mDa  | PPM  | DBE  | i-FIT | Formula                                                            |
|----------|------------|------|------|------|-------|--------------------------------------------------------------------|
| 515.1155 | 515.1156   | -0.1 | -0.2 | 14.5 | 69.2  | C <sub>24</sub> H <sub>24</sub> N <sub>4</sub> O <sub>5</sub> S Cl |

HRMS of Compound-2b

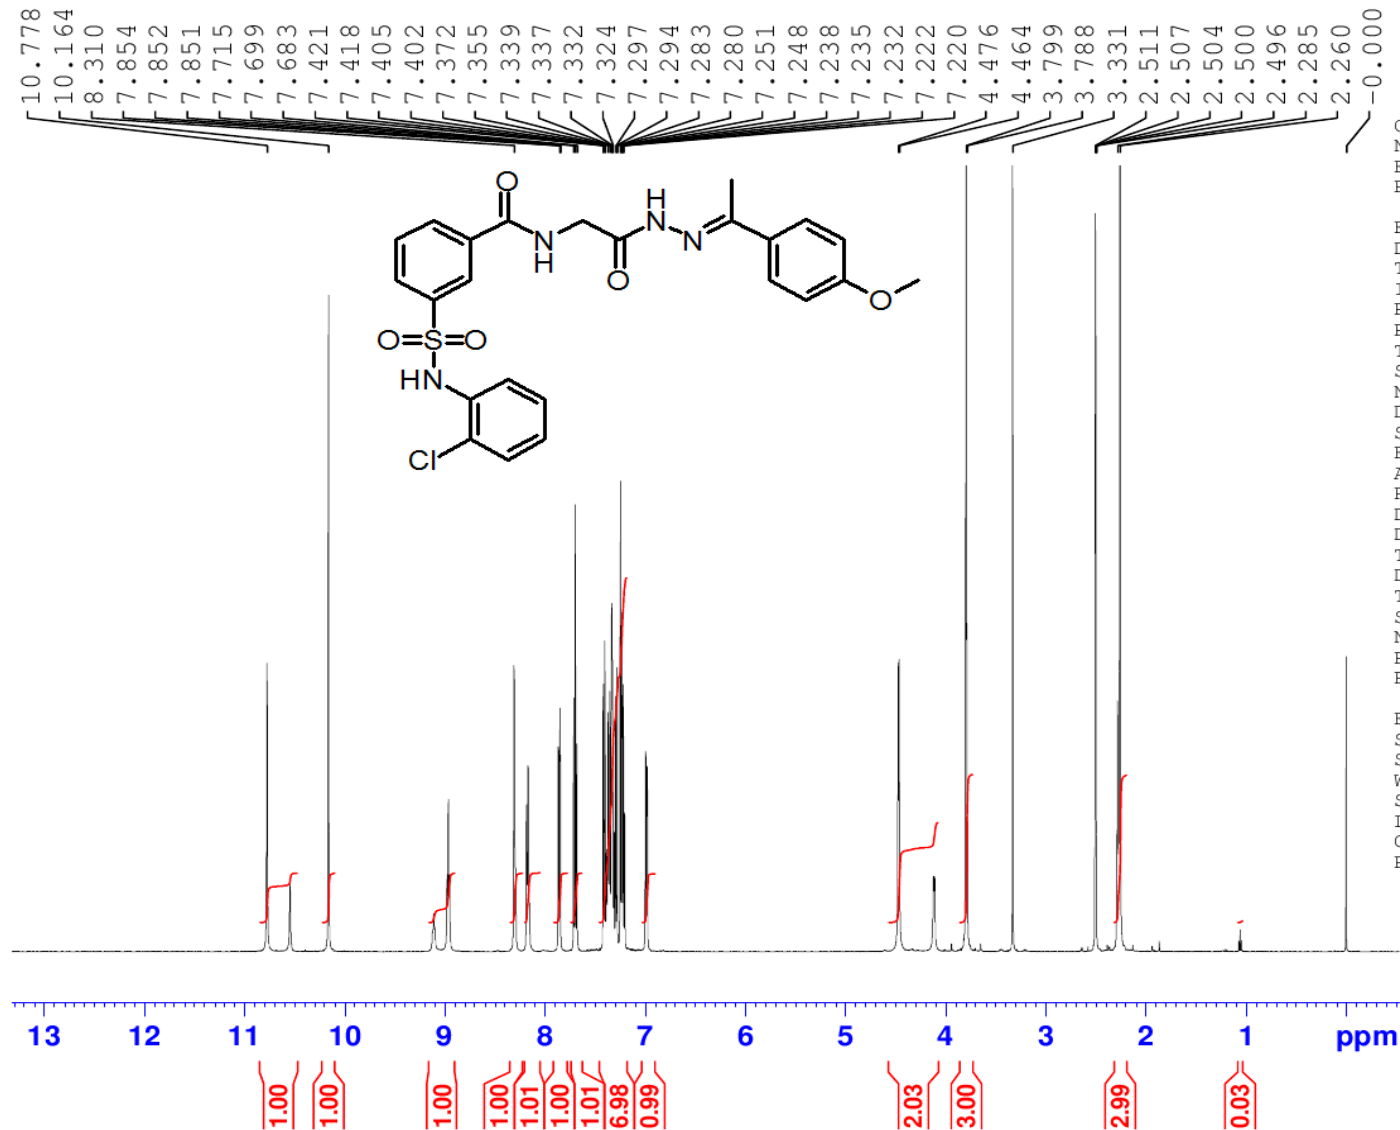

Current Data Parameters  
 NAME 511612B0600  
 EXPNO 4  
 PROCNO 1

F2 - Acquisition Parameters  
 Date\_ 20170104  
 Time 8.14 h  
 INSTRUM spect  
 PROBHD Z119470\_0231 (zg30)  
 PULPROG 65536  
 TD 8  
 SOLVENT DMSO  
 NS 0  
 DS 10000.000 Hz  
 SWH 0.305176 Hz  
 FIDRES 3.2767999 sec  
 AQ 97.81  
 RG 50.000 usec  
 DW 6.50 usec  
 DE 298.9 K  
 TE 1.00000000 sec  
 D1 1  
 TD0 500.1330885 MHz  
 SFO1 1H  
 NUC1 8.75 usec  
 P1 23.00000000 W  
 PLW1

F2 - Processing parameters  
 SI 65536  
 SF 500.1300024 MHz  
 WDW EM  
 SSB 0  
 LB 0.30 Hz  
 GB 0  
 PC 1.00

<sup>1</sup>H NMR of Compound-2c in DMSO-d<sub>6</sub>

GVB-SK-33

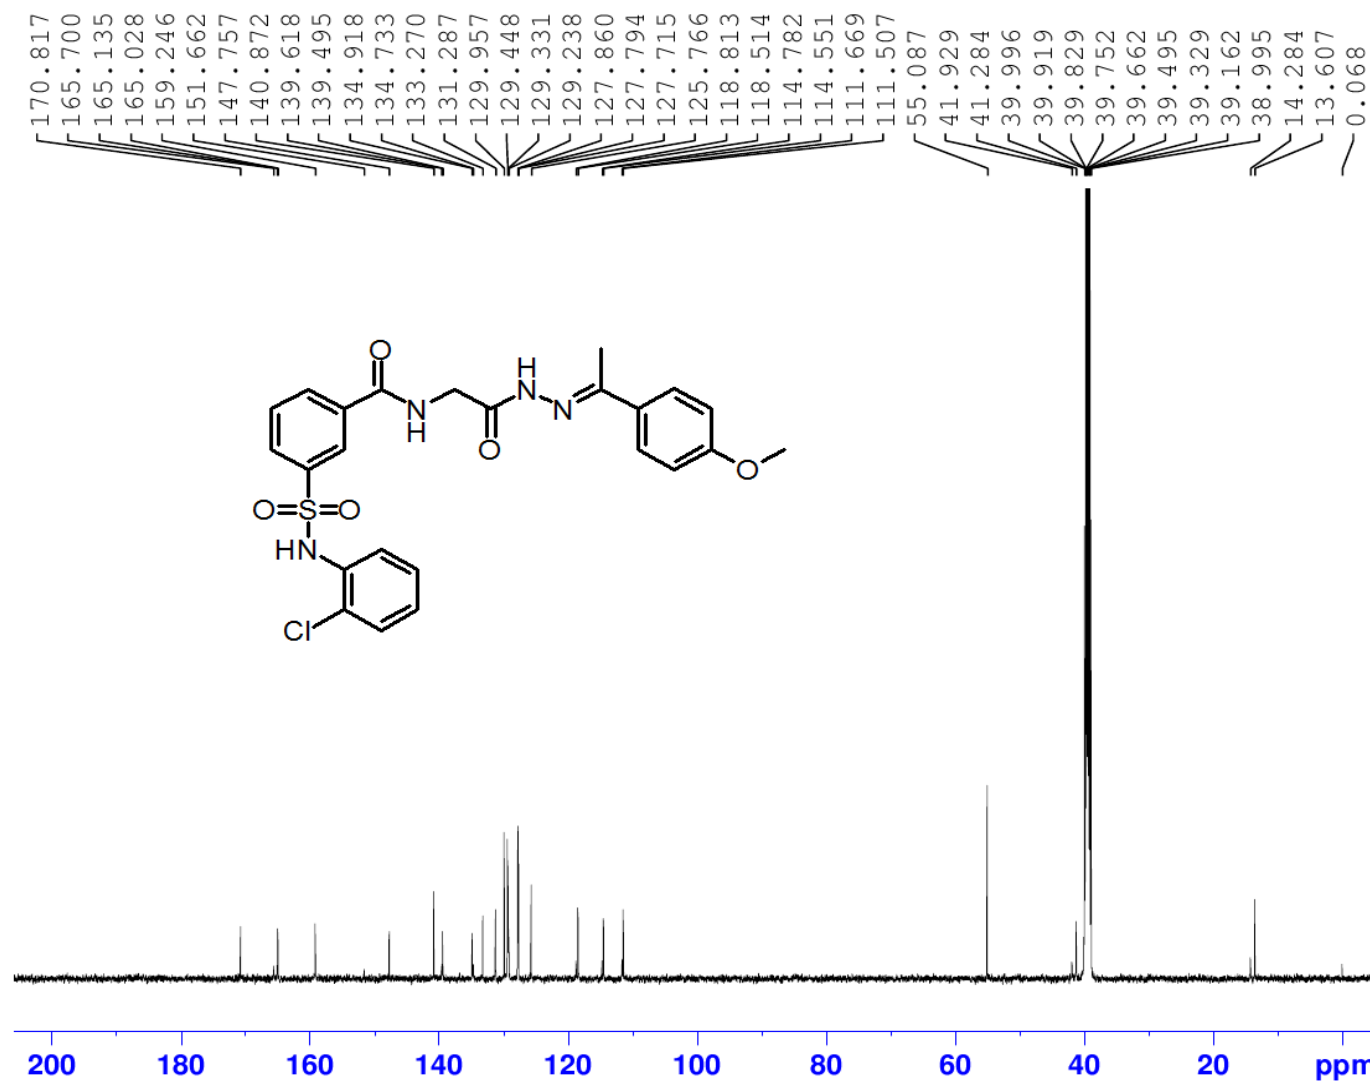

Current Data Parameters  
NAME 511612B0600  
EXPNO 3  
PROCNO 1

F2 - Acquisition Parameters  
Date\_ 20170104  
Time 8.00 h  
INSTRUM spect  
PROBHD Z119470\_0231 (   
PULPROG zgpg30  
TD 65536  
SOLVENT DMSO  
NS 1024  
DS 4  
SWH 29761.904 Hz  
FIDRES 0.908261 Hz  
AQ 1.1010048 sec  
RG 197.72  
DW 16.800 usec  
DE 6.50 usec  
TE 299.4 K  
D1 3.00000000 sec  
D11 0.03000000 sec  
TD0 1  
SFO1 125.7703643 MHz  
NUC1 13C  
P1 9.50 usec  
PLW1 88.00000000 W  
SFO2 500.1320005 MHz  
NUC2 1H  
CPDPRG[2] waltz16  
PCPD2 80.00 usec  
PLW2 23.00000000 W  
PLW12 0.27515000 W  
PLW13 0.13840000 W

F2 - Processing parameters  
SI 32768  
SF 125.7578522 MHz  
WDW EM  
SSB 0  
LB 2.00 Hz  
GB 0  
PC 1.40

<sup>13</sup>CNMR of Compound-2c in DMSO-d<sub>6</sub>



## Elemental Composition Report

Page 1

### Single Mass Analysis

Tolerance = 1000.0 PPM / DBE: min = -1.5, max = 50.0

Selected filters: None

Monoisotopic Mass, Even Electron Ions

113 formula(e) evaluated with 1 results within limits (up to 1 closest results for each mass)

Elements Used:

C: 0-24 H: 0-24 N: 0-4 O: 0-5 S: 0-1 Cl: 0-1

SAMPLE CODE: COMPOUND-33

511701A5142 37 (0.544) AM (Top,4, Ar,5000.0,195.18,1.00,LS 5); Sm (Mn, 1x1.00); Sb (1.40.00 )

1: TOF MS ES+  
992

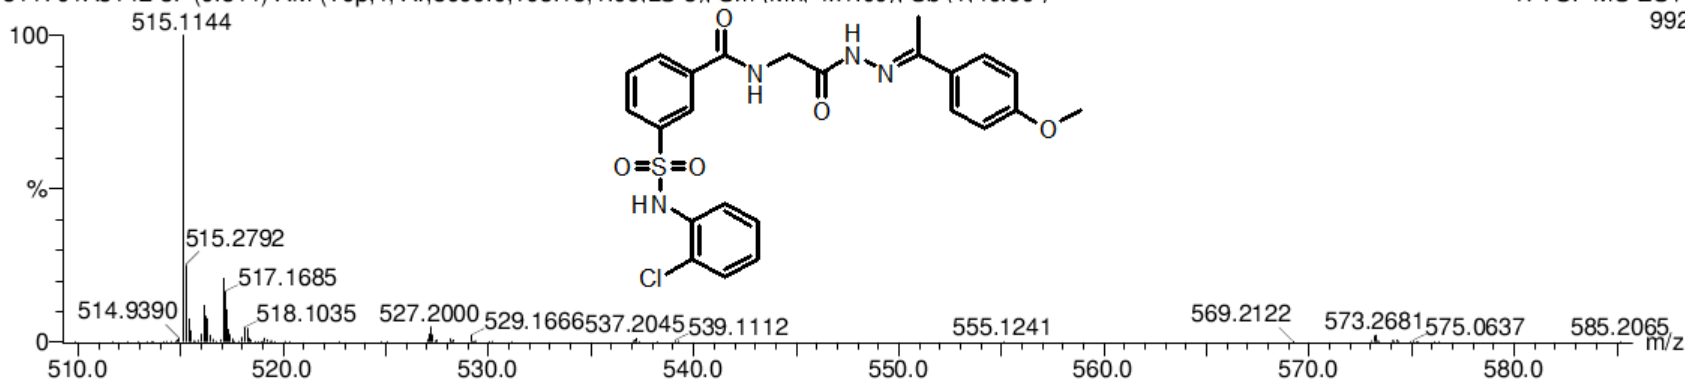

Minimum: -1.5  
Maximum: 5.0 1000.0 50.0

| Mass     | Calc. Mass | mDa  | PPM  | DBE  | i-FIT | Formula                                                            |
|----------|------------|------|------|------|-------|--------------------------------------------------------------------|
| 515.1144 | 515.1156   | -1.2 | -2.3 | 14.5 | 92.6  | C <sub>24</sub> H <sub>24</sub> N <sub>4</sub> O <sub>5</sub> S Cl |

HRMS of Compound-2c

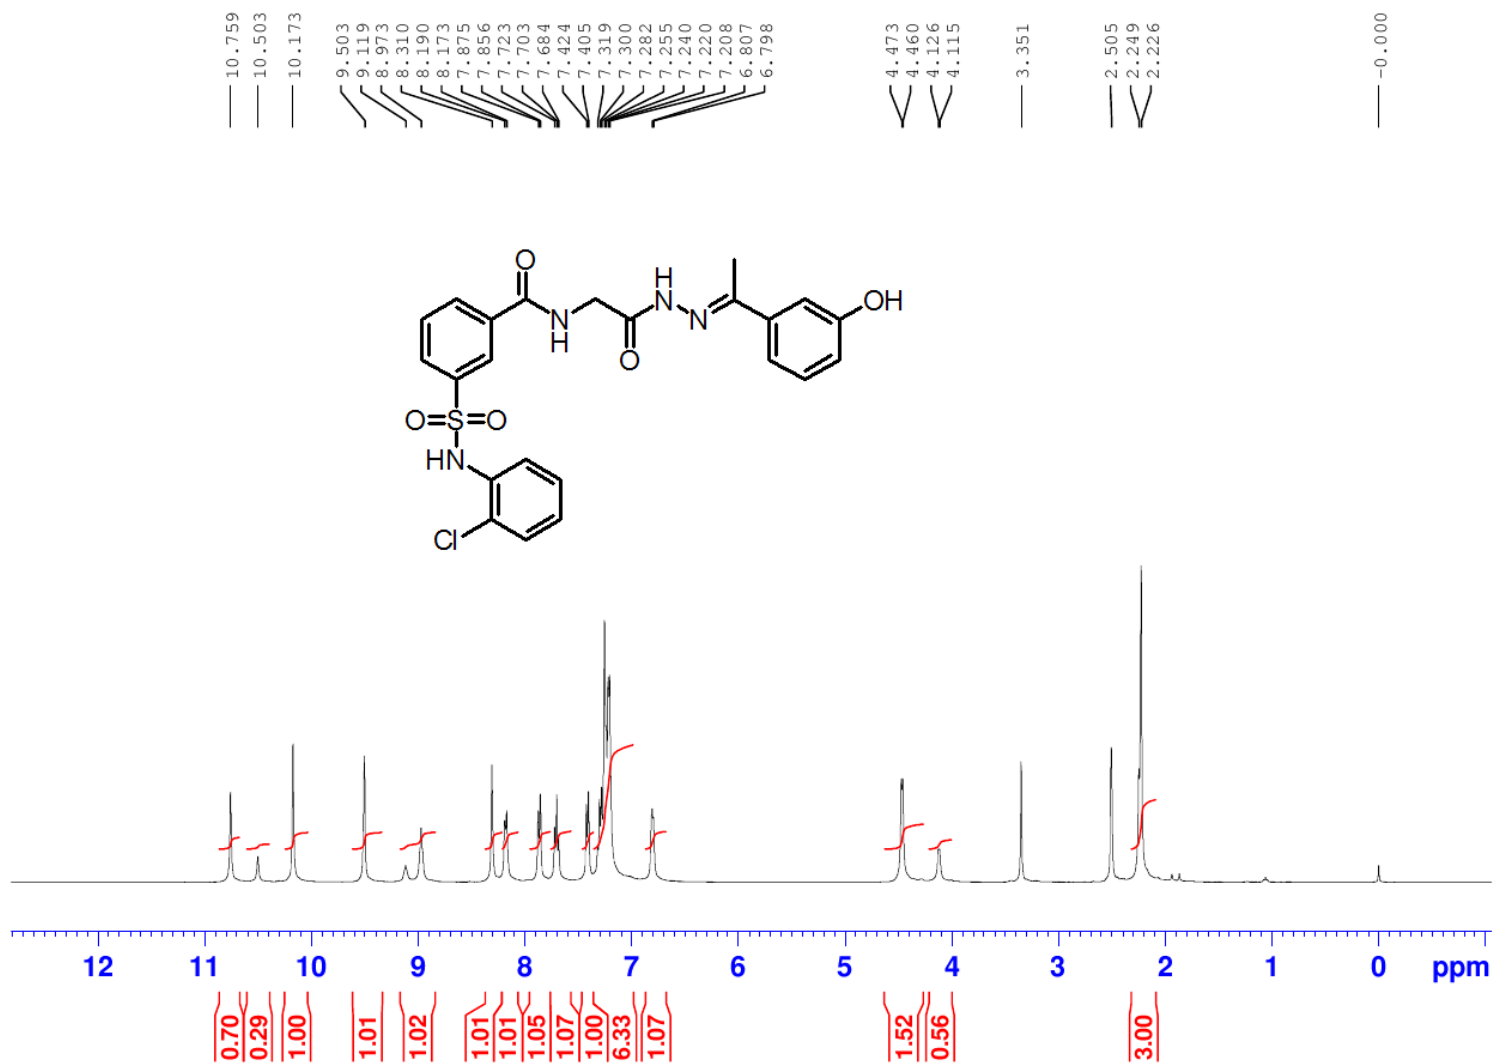

Current Data Parameters  
 NAME 511612B0603  
 EXPNO 1  
 PROCNO 1

F2 - Acquisition Parameters  
 Date\_ 20170104  
 Time 21.25  
 INSTRUM spect  
 PROBHD 5 mm PABBO BB/  
 PULPROG zg30  
 TD 65536  
 SOLVENT DMSO  
 NS 16  
 DS 2  
 SWH 8012.820 Hz  
 FIDRES 0.122266 Hz  
 AQ 4.0894465 sec  
 RG 86.08  
 DW 62.400 usec  
 DE 6.50 usec  
 TE 298.2 K  
 D1 1.00000000 sec  
 TD0 1

===== CHANNEL f1 =====  
 SFO1 400.1324710 MHz  
 NUC1 1H  
 P1 9.75 usec  
 PLW1 16.00000000 W

F2 - Processing parameters  
 SI 65536  
 SF 400.1300008 MHz  
 WDW EM  
 SSB 0  
 LB 0.30 Hz  
 GB 0  
 PC 1.00

ANL-MCL5-NMR-001

<sup>1</sup>H NMR of **Compound-2d** in DMSO-d<sub>6</sub>

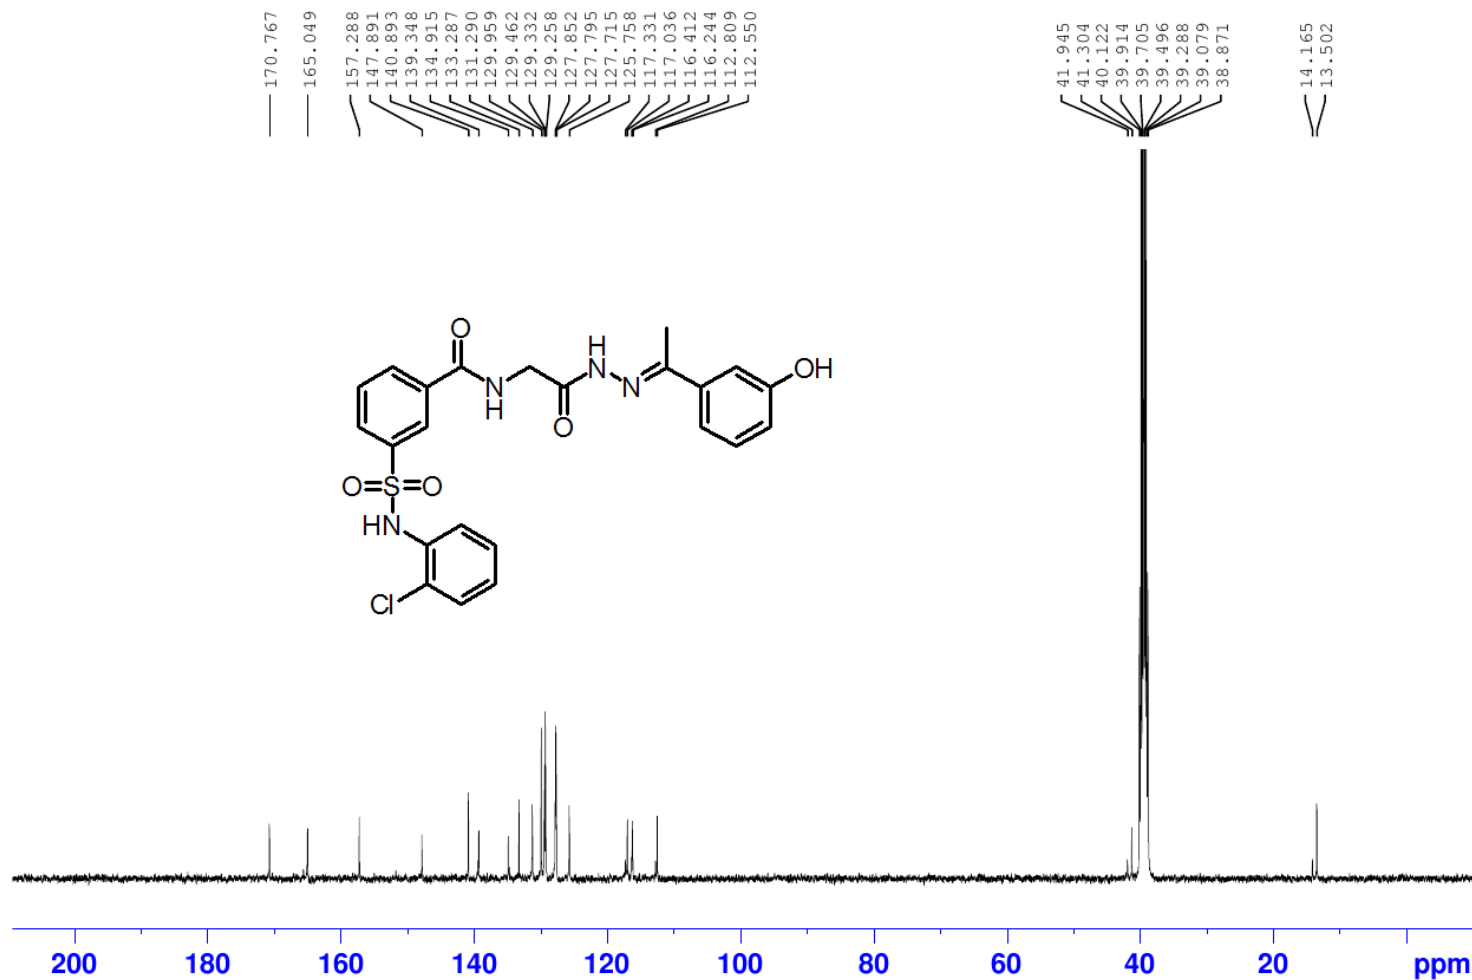

Current Data Parameters  
NAME 511612B0603  
EXPNO 2  
PROCNO 1

F2 - Acquisition Parameters  
Date\_ 20170105  
Time 3.32  
INSTRUM spect  
PROBHD 5 mm PABBO BB/  
PULPROG zgpg30  
TD 65536  
SOLVENT DMSO  
NS 1024  
DS 4  
SWH 24038.461 Hz  
FIDRES 0.366798 Hz  
AQ 1.3631488 sec  
RG 195.29  
DW 20.800 usec  
DE 6.50 usec  
TE 300.2 K  
D1 3.00000000 sec  
D11 0.03000000 sec  
TD0 1

===== CHANNEL f1 =====  
SFO1 100.6228293 MHz  
NUC1 13C  
P1 10.00 usec  
PLW1 78.00000000 W

===== CHANNEL f2 =====  
SFO2 400.1316005 MHz  
NUC2 1H  
CPDPRG[2] waltz16  
PCPD2 90.00 usec  
PLW2 16.00000000 W  
PLW12 0.18777999 W  
PLW13 0.15210000 W

F2 - Processing parameters  
SI 32768  
SF 100.6128192 MHz  
WDW EM  
SSB 0  
LB 2.00 Hz  
GB 0  
PC 1.40

ANL-MCL5-NMR-001

<sup>13</sup>CNMR of **Compound-2d** in DMSO-d<sub>6</sub>

## Elemental Composition Report

Page 1

### Single Mass Analysis

Tolerance = 1000.0 PPM / DBE: min = -1.5, max = 50.0

Selected filters: None

Monoisotopic Mass, Even Electron Ions

221 formula(e) evaluated with 4 results within limits (up to 1 closest results for each mass)

Elements Used:

C: 0-23 H: 0-22 N: 0-4 O: 0-5 F: 0-1 S: 0-1 Cl: 0-1

SAMPLE CODE: COMPOUND-36

511701A5132 18 (0.259) AM (Top,4, Ar,5000.0,195.16,1.00,LS 5); Sm (Mn, 1x1.00); Sb (1,40.00)

1: TOF MS ES+  
6.42e3

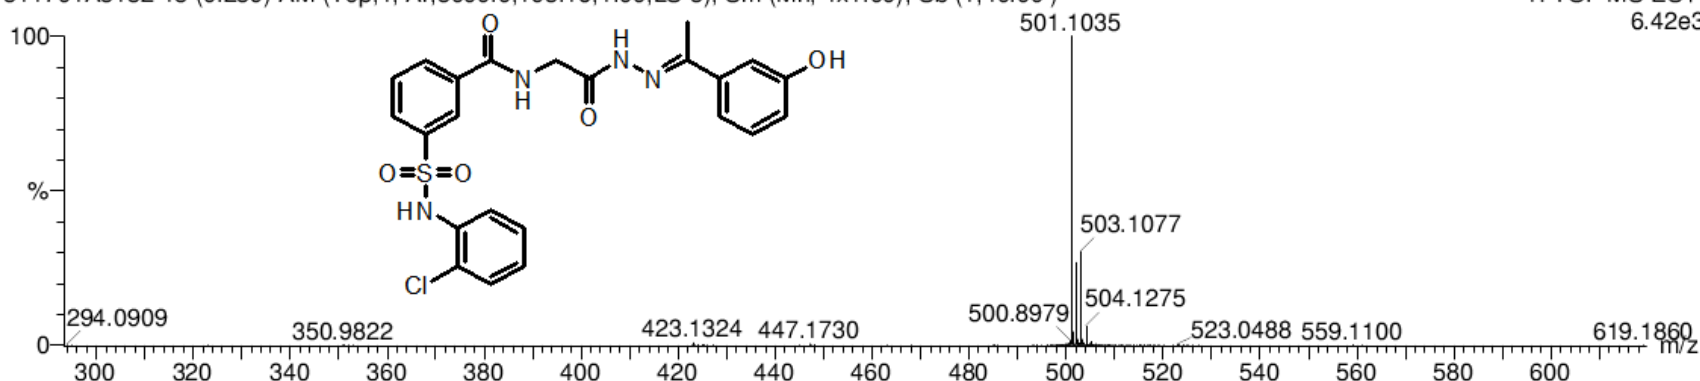

Minimum: -1.5  
Maximum: 5.0 1000.0 50.0

| Mass     | Calc. Mass | mDa | PPM | DBE  | i-FIT | Formula            |
|----------|------------|-----|-----|------|-------|--------------------|
| 501.1035 | 501.0999   | 3.6 | 7.2 | 14.5 | 91.8  | C23 H22 N4 O5 S Cl |

### HRMS of Compound-2d

## Elemental Composition Report

Page 1

### Single Mass Analysis

Tolerance = 1000.0 PPM / DBE: min = -1.5, max = 50.0

Selected filters: None

Monoisotopic Mass, Even Electron Ions

113 formula(e) evaluated with 1 results within limits (up to 1 closest results for each mass)

Elements Used:

C: 0-23 H: 0-22 N: 0-4 O: 0-5 S: 0-1 Cl: 0-1

GVB-SK44-01

511702A3696 11 (0.157) AM (Top,4, Ar,5000.0,195.49,1.00,LS 10); Sm (Mn, 2x1.00); Sb (1,40.00 )

1: TOF MS ES+  
528

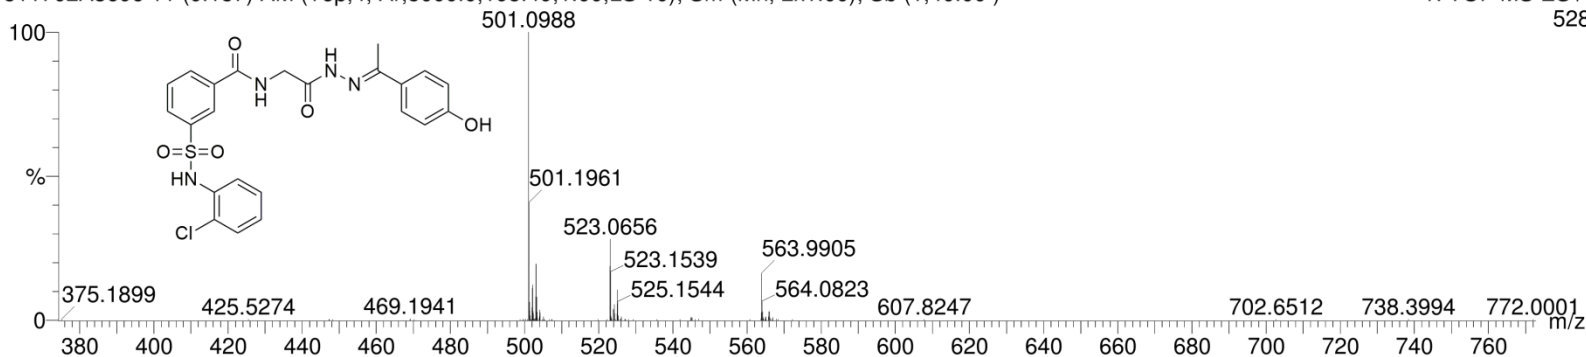

Minimum: -1.5  
Maximum: 5.0 1000.0 50.0

| Mass     | Calc. Mass | mDa  | PPM  | DBE  | i-FIT | Formula            |
|----------|------------|------|------|------|-------|--------------------|
| 501.0988 | 501.0999   | -1.1 | -2.2 | 14.5 | 50.9  | C23 H22 N4 O5 S Cl |

### HRMS of Compound-2e

GVB-SK-45

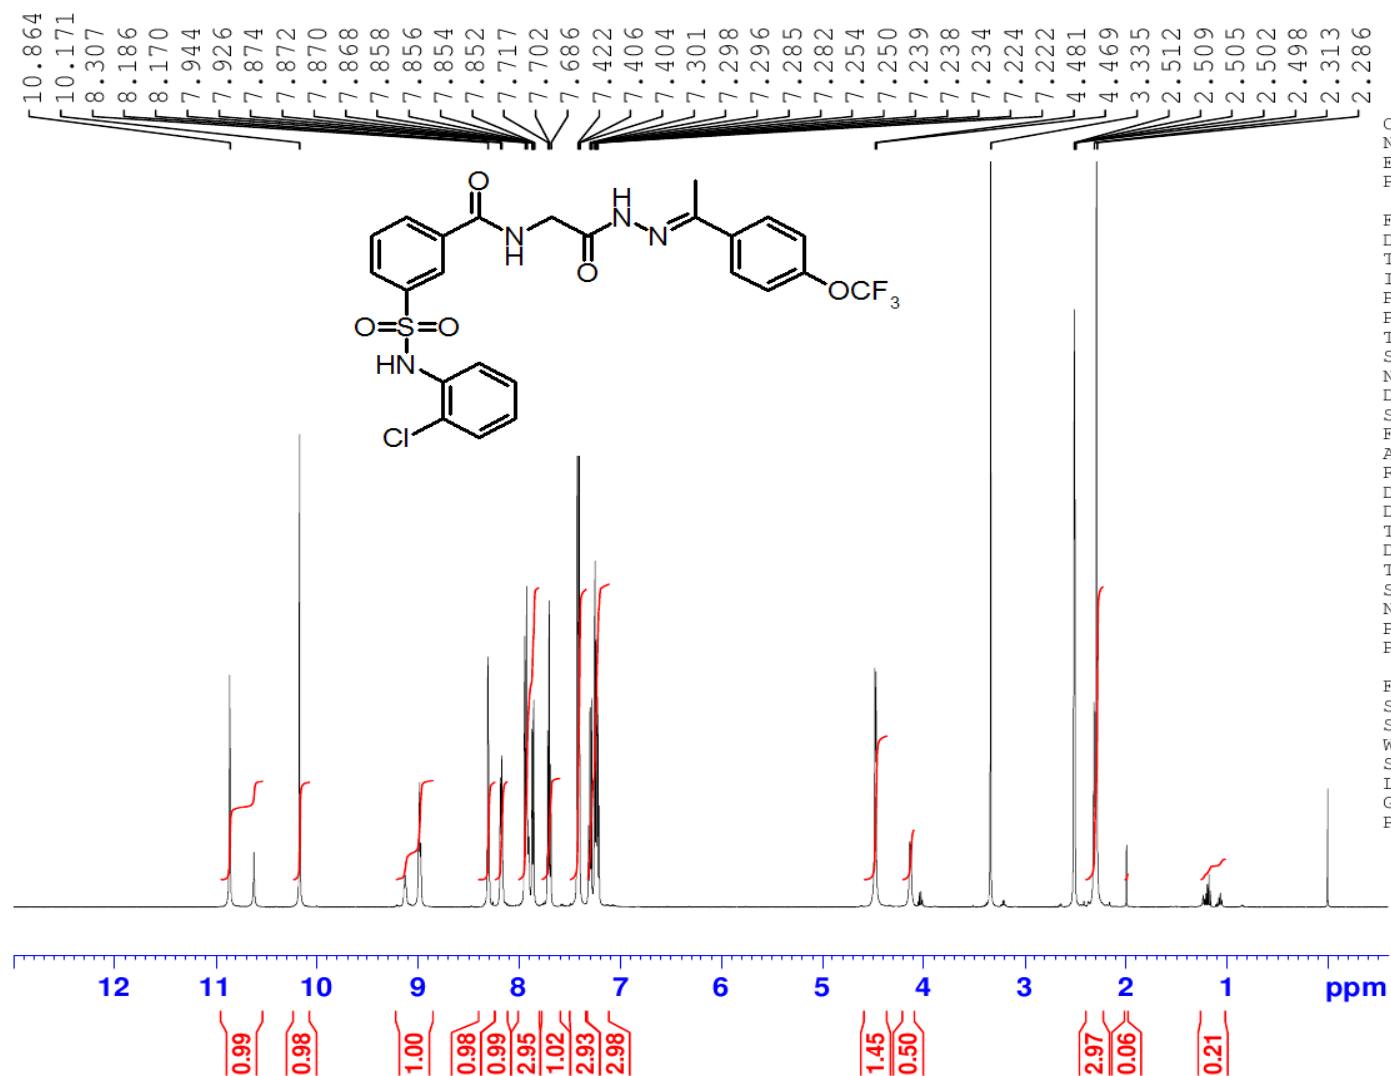

Current Data Parameters  
NAME 511612B0612  
EXPNO 1  
PROCNO 1

F2 - Acquisition Parameters  
Date\_ 20170105  
Time 20.51 h  
INSTRUM spect  
PROBHD Z119470\_0231 (   
PULPROG zg30  
TD 65536  
SOLVENT DMSO  
NS 8  
DS 0  
SWH 10000.000 Hz  
FIDRES 0.305176 Hz  
AQ 3.2767999 sec  
RG 111.07  
DW 50.000 usec  
DE 6.50 usec  
TE 298.1 K  
D1 1.00000000 sec  
TD0 1  
SFO1 500.1330885 MHz  
NUC1 1H  
P1 8.75 usec  
PLW1 23.00000000 W

F2 - Processing parameters  
SI 65536  
SF 500.1300014 MHz  
WDW EM  
SSB 0  
LB 0.30 Hz  
GB 0  
PC 1.00

<sup>1</sup>H NMR of **Compound-2f** in DMSO-d<sub>6</sub>

GVB-SK-45

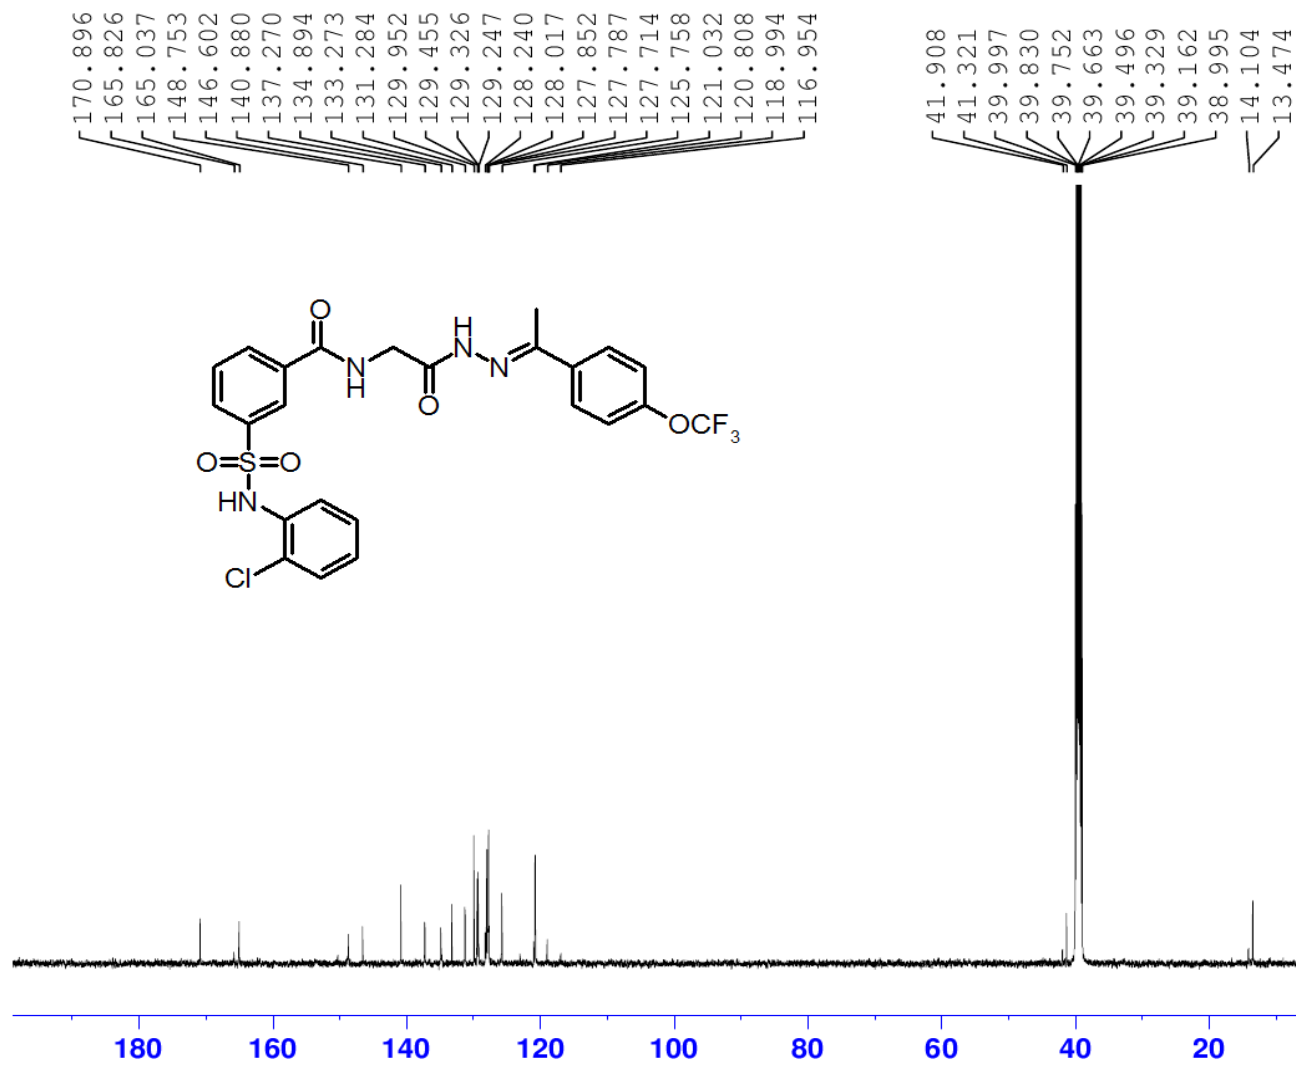

Current Data Parameters  
 NAME 511612B0612  
 EXPNO 2  
 PROCNO 1

F2 - Acquisition Parameters  
 Date\_ 20170106  
 Time 1.36 h  
 INSTRUM spect  
 PROBHD z119470\_0231 (  
 PULPROG zgpg30  
 TD 65536  
 SOLVENT DMSO  
 NS 1024  
 DS 4  
 SWH 29761.904 Hz  
 FIDRES 0.908261 Hz  
 AQ 1.1010048 sec  
 RG 197.72  
 DW 16.800 usec  
 DE 6.50 usec  
 TE 299.9 K  
 D1 3.00000000 sec  
 D11 0.03000000 sec  
 TD0 1  
 SFO1 125.7703643 MHz  
 NUC1 13C  
 P1 9.50 usec  
 PLW1 88.00000000 W  
 SFO2 500.1320005 MHz  
 NUC2 1H  
 CPDPRG[2] waltz16  
 PCPD2 80.00 usec  
 PLW2 23.00000000 W  
 PLW12 0.27515000 W  
 PLW13 0.13840000 W

F2 - Processing parameters  
 SI 32768  
 SF 125.7578523 MHz  
 WDW EM  
 SSB 0  
 LB 2.00 Hz  
 GB 0  
 PC 1.40

<sup>13</sup>CNMR of Compound-2f in DMSO-d<sub>6</sub>

## Elemental Composition Report

Page 1

### Single Mass Analysis

Tolerance = 1000.0 PPM / DBE: min = -1.5, max = 50.0

Selected filters: None

Monoisotopic Mass, Even Electron Ions

469 formula(e) evaluated with 1 results within limits (up to 1 closest results for each mass)

Elements Used:

C: 0-24 H: 0-30 N: 0-4 O: 0-5 S: 0-1 Cl: 0-1 F: 0-3

SAMPLE CODE:COMPOUND-45

511701A5130 56 (0.797) AM (Top,4, Ar,5000.0,195.15,1.00,LS 5); Sm (Mn, 1x1.00); Sb (1,40.00 )

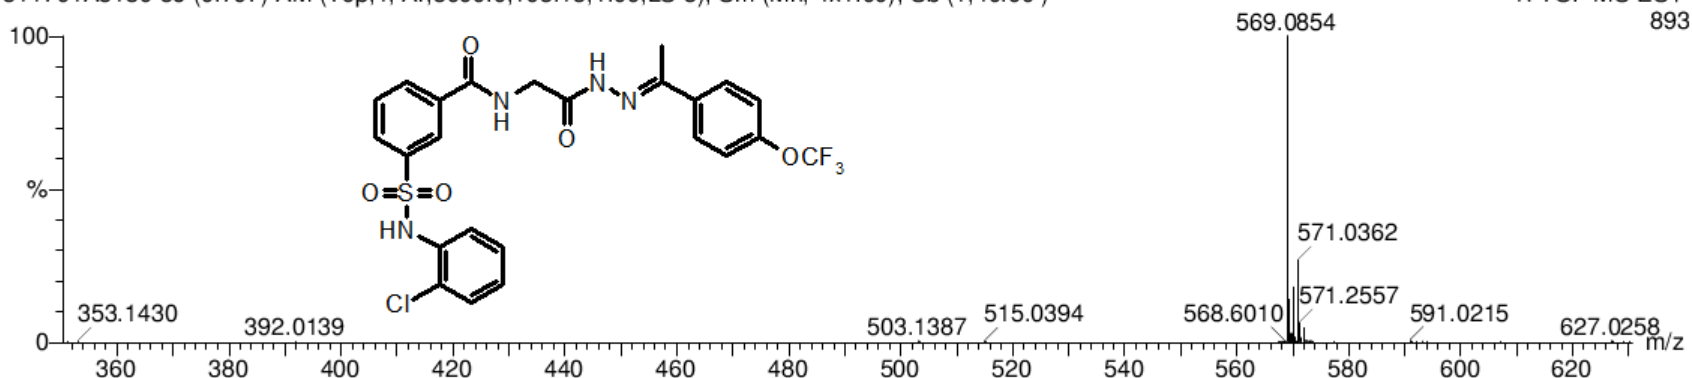

Minimum: -1.5  
Maximum: 5.0 1000.0 50.0

| Mass     | Calc. Mass | mDa  | PPM  | DBE  | i-FIT | Formula                                                                           |
|----------|------------|------|------|------|-------|-----------------------------------------------------------------------------------|
| 569.0854 | 569.0873   | -1.9 | -3.3 | 14.5 | 38.7  | C <sub>24</sub> H <sub>21</sub> N <sub>4</sub> O <sub>5</sub> S Cl F <sub>3</sub> |

HRMS of Compound-2f



GVB-SK37-01

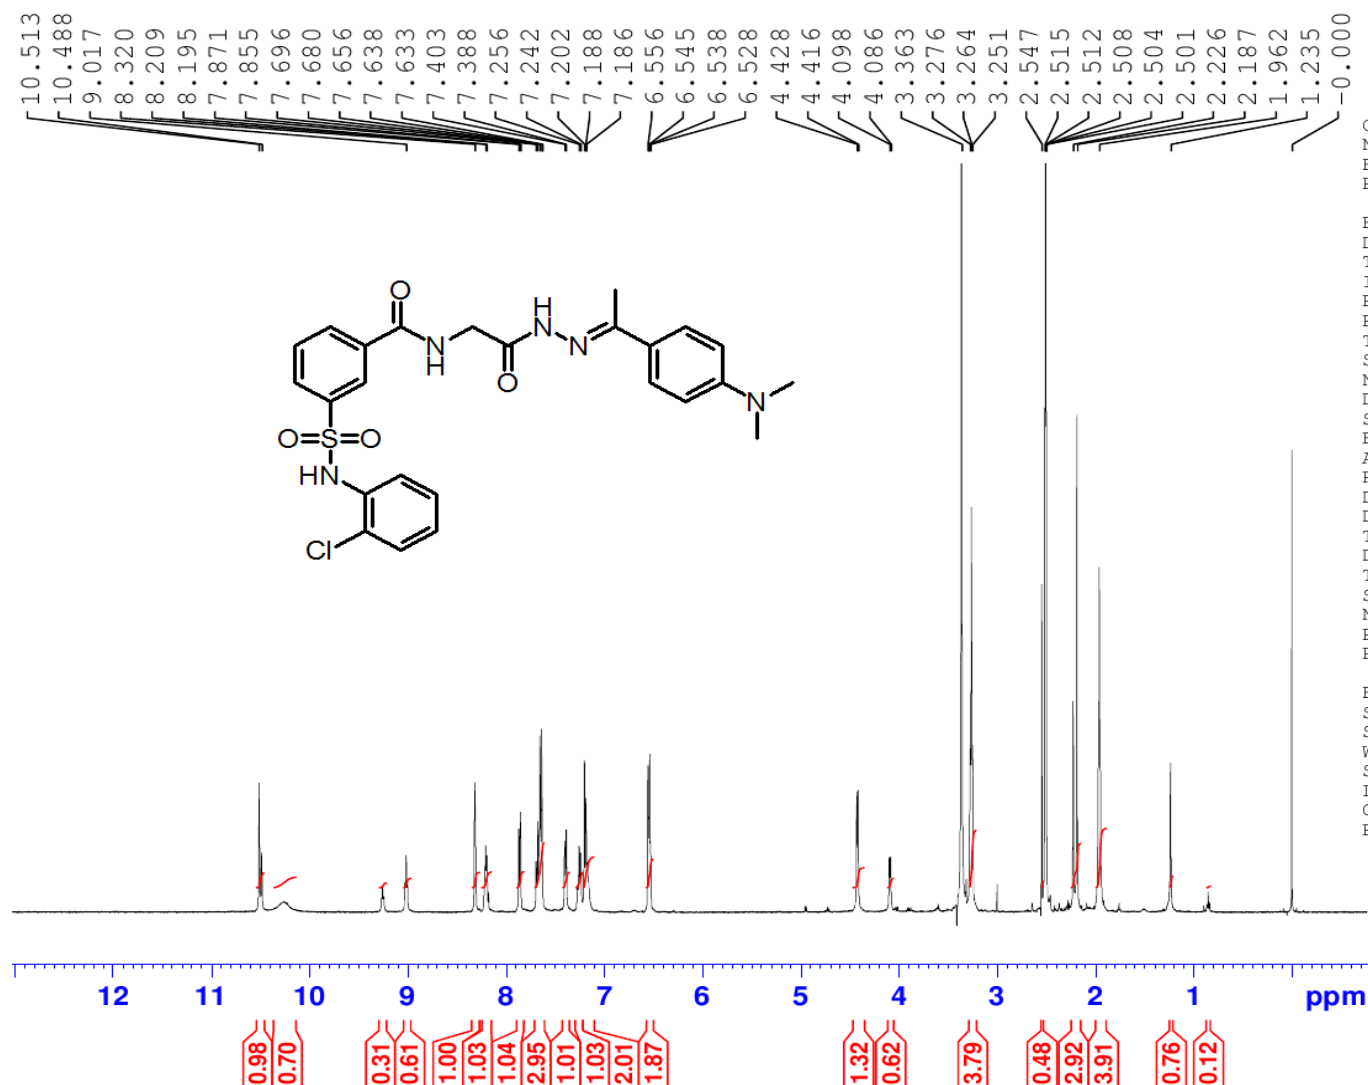

Current Data Parameters  
 NAME 511701C3022  
 EXPNO 1  
 PROCNO 1

F2 - Acquisition Parameters  
 Date\_ 20170126  
 Time 22.49 h  
 INSTRUM spect  
 PROBHD z119470\_0231 (  
 PULPROG zg30  
 TD 65536  
 SOLVENT DMSO  
 NS 8  
 DS 0  
 SWH 10000.000 Hz  
 FIDRES 0.305176 Hz  
 AQ 3.2767999 sec  
 RG 157.05  
 DW 50.000 usec  
 DE 6.50 usec  
 TE 298.1 K  
 D1 1.00000000 sec  
 TD0 1  
 SFO1 500.1330885 MHz  
 NUC1 1H  
 P1 8.75 usec  
 PLW1 23.00000000 W

F2 - Processing parameters  
 SI 65536  
 SF 500.1300004 MHz  
 WDW EM  
 SSB 0  
 LB 0.30 Hz  
 GB 0  
 PC 1.00

<sup>1</sup>H NMR of Compound-2g in DMSO-d<sub>6</sub>

GVB-SK37-01

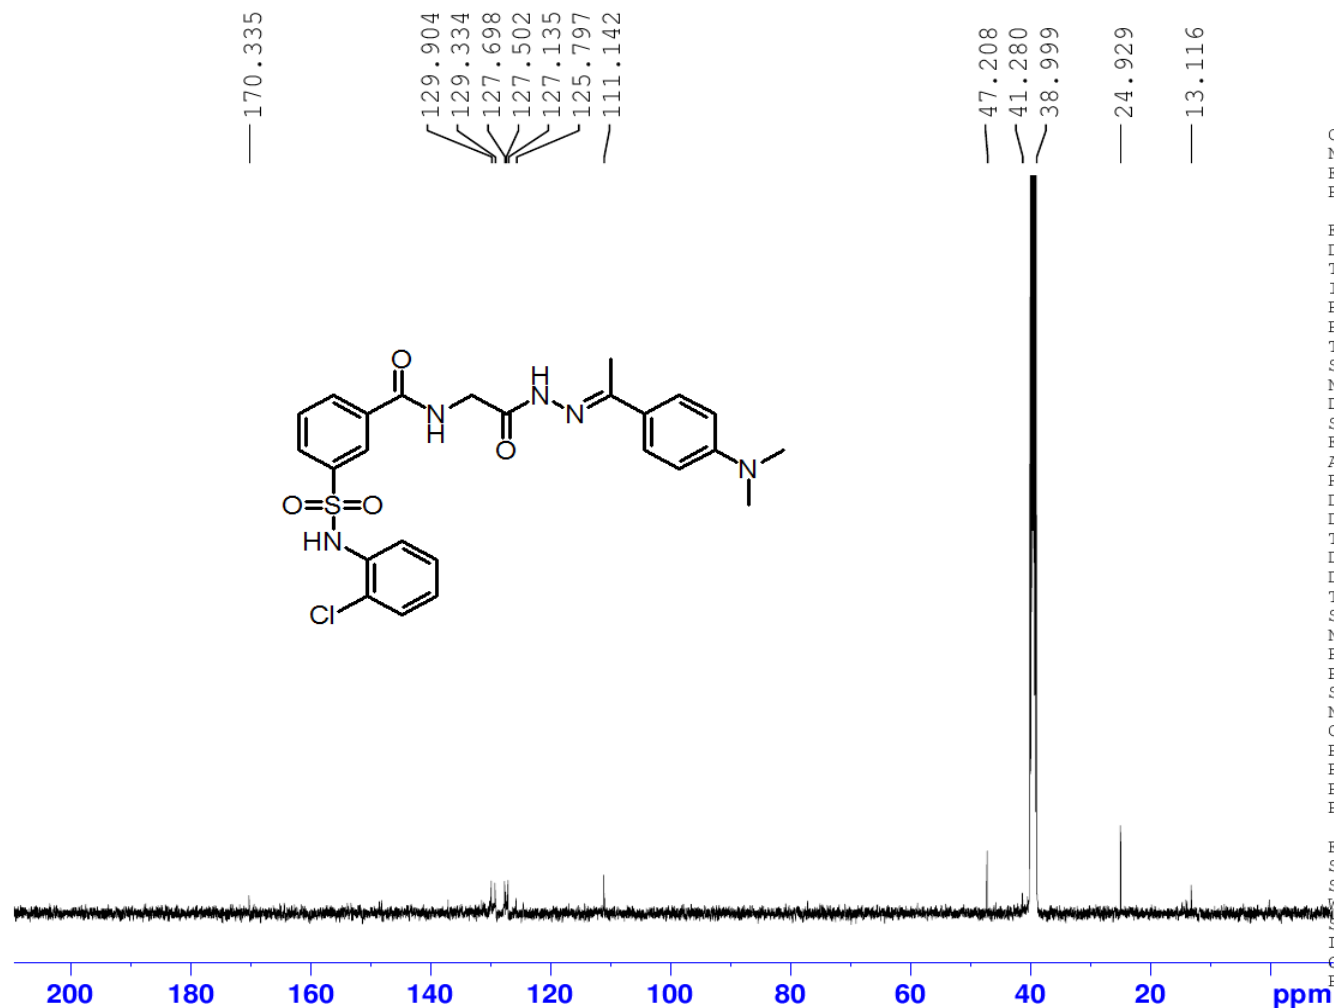

Current Data Parameters  
 NAME 511701C3022  
 EXPNO 2  
 PROCNO 1

F2 - Acquisition Parameters  
 Date\_ 20170127  
 Time 0.02 h  
 INSTRUM spect  
 PROBHD Z119470\_0231 (  
 PULPROG zgpg30  
 TD 65536  
 SOLVENT DMSO  
 NS 1024  
 DS 4  
 SWH 29761.904 Hz  
 FIDRES 0.908261 Hz  
 AQ 1.1010048 sec  
 RG 197.72  
 DW 16.800 usec  
 DE 6.50 usec  
 TE 298.1 K  
 D1 3.00000000 sec  
 D11 0.03000000 sec  
 TD0 1  
 SFO1 125.7703643 MHz  
 NUC1 13C  
 P1 9.50 usec  
 PLW1 88.00000000 W  
 SFO2 500.1320005 MHz  
 NUC2 1H  
 CPDPRG[2] waltz16  
 PCPD2 80.00 usec  
 PLW2 23.00000000 W  
 PLW12 0.27515000 W  
 PLW13 0.13840000 W

F2 - Processing parameters  
 SI 32768  
 SF 125.7578501 MHz  
 WDW EM  
 SSB 0  
 LB No filename specified  
 GB 0  
 PC 1.40

<sup>13</sup>CNMR of Compound-2g in DMSO-d<sub>6</sub>

## Elemental Composition Report

Page 1

### Single Mass Analysis

Tolerance = 1000.0 PPM / DBE: min = -1.5, max = 50.0

Selected filters: None

Monoisotopic Mass, Even Electron Ions

113 formula(e) evaluated with 1 results within limits (up to 1 closest results for each mass)

Elements Used:

C: 0-25 H: 0-27 N: 0-5 O: 0-4 S: 0-1 Cl: 0-1

GVB-SK37

511702A2311 12 (0.165) AM (Top,4, Ar,5000.0,195.50,1.00,LS 10); Sm (Mn, 2x1.00); Sb (1,40.00 )

1: TOF MS ES+  
3.42e3

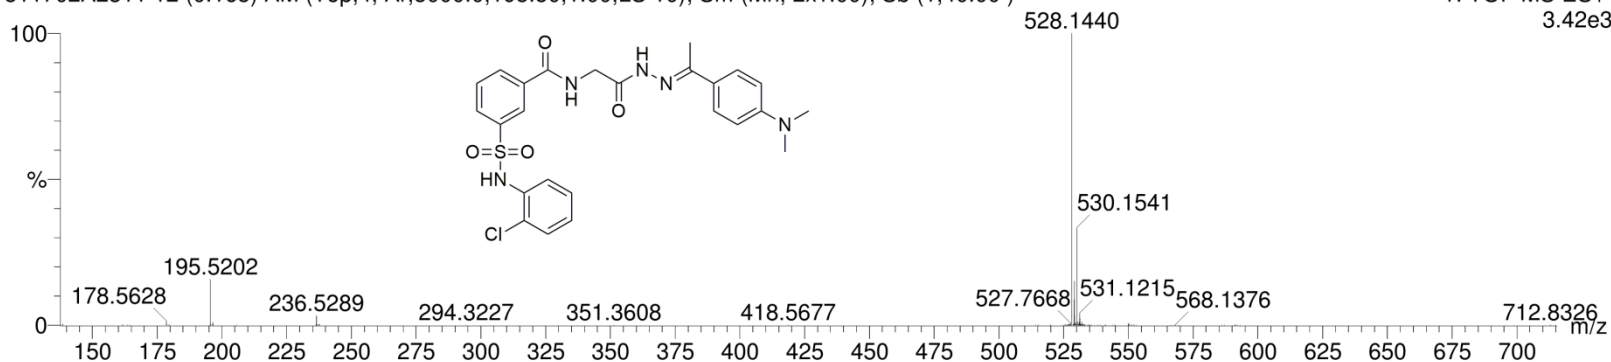

Minimum: -1.5  
Maximum: 5.0 1000.0 50.0

| Mass     | Calc. Mass | mDa  | PPM  | DBE  | i-FIT | Formula            |
|----------|------------|------|------|------|-------|--------------------|
| 528.1440 | 528.1472   | -3.2 | -6.1 | 14.5 | 196.0 | C25 H27 N5 O4 S Cl |

### HRMS of Compound-2g

GVB-SK39-01

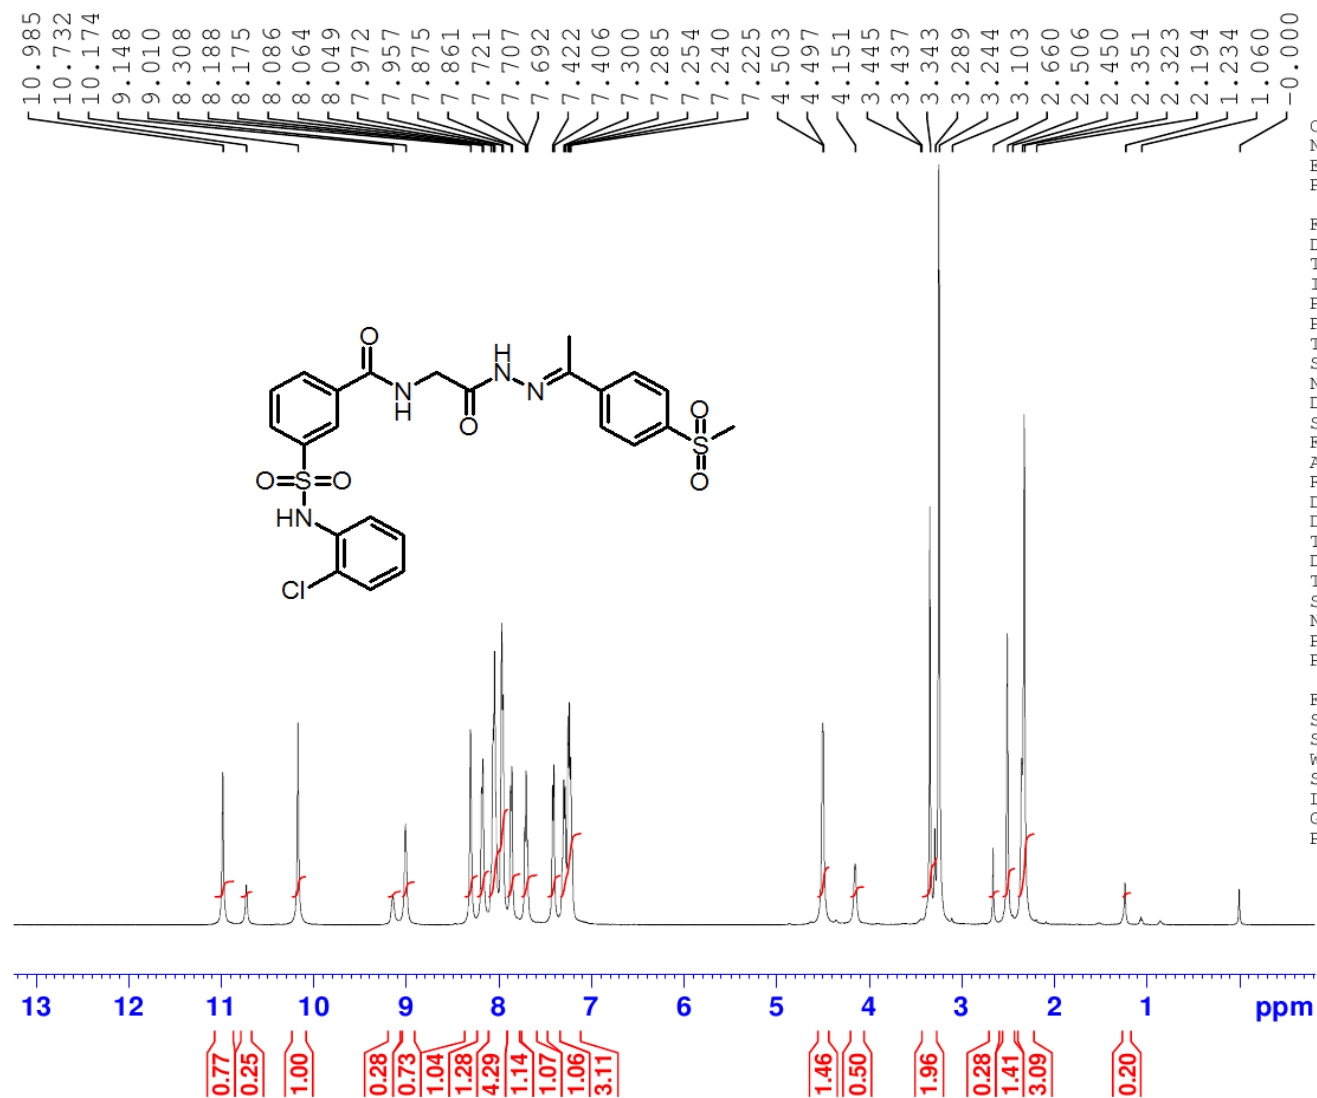

Current Data Parameters  
 NAME 511701C3029  
 EXPNO 1  
 PROCNO 1

F2 - Acquisition Parameters  
 Date\_ 20170127  
 Time 1.21 h  
 INSTRUM spect  
 PROBHD Z119470\_0231 (  
 PULPROG zg30  
 TD 65536  
 SOLVENT DMSO  
 NS 8  
 DS 0  
 SWH 10000.000 Hz  
 FIDRES 0.305176 Hz  
 AQ 3.2767999 sec  
 RG 89.27  
 DW 50.000 usec  
 DE 6.50 usec  
 TE 298.1 K  
 D1 1.00000000 sec  
 TD0 1  
 SFO1 500.1330885 MHz  
 NUC1 1H  
 P1 8.75 usec  
 PLW1 23.00000000 W

F2 - Processing parameters  
 SI 65536  
 SF 500.1300016 MHz  
 WDW EM  
 SSB 0  
 LB 0.30 Hz  
 GB 0  
 PC 1.00

<sup>1</sup>H NMR of **Compound-2h** in DMSO-d<sub>6</sub>

GVB-SK39-01

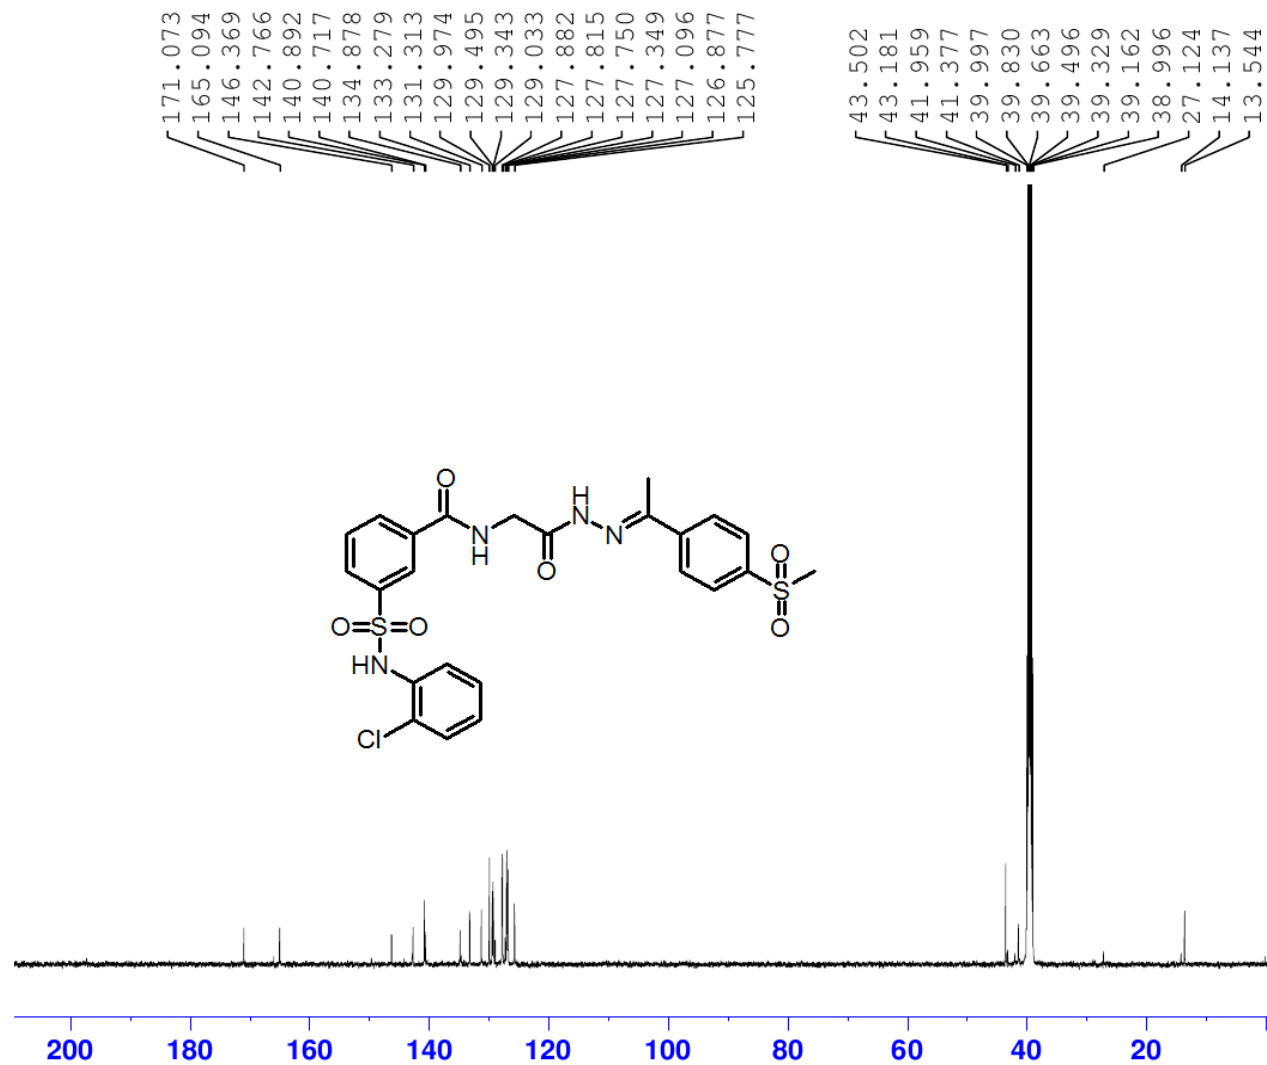

Current Data Parameters  
 NAME 511701C3029  
 EXPNO 2  
 PROCNO 1

F2 - Acquisition Parameters

Date\_ 20170127  
 Time 2.33 h  
 INSTRUM spect  
 PROBHD Z119470\_0231 (  
 PULPROG zgpg30  
 TD 65536  
 SOLVENT DMSO  
 NS 1024  
 DS 4  
 SWH 29761.904 Hz  
 FIDRES 0.908261 Hz  
 AQ 1.1010048 sec  
 RG 197.72  
 DW 16.800 usec  
 DE 6.50 usec  
 TE 298.1 K  
 D1 3.00000000 sec  
 D11 0.03000000 sec  
 TD0 1  
 SFO1 125.7703643 MHz  
 NUC1 13C  
 P1 9.50 usec  
 PLW1 88.00000000 W  
 SFO2 500.1320005 MHz  
 NUC2 1H  
 CPDPRG2 waltz16  
 PCPD2 80.00 usec  
 PLW2 23.00000000 W  
 PLW12 0.27515000 W  
 PLW13 0.13840000 W

F2 - Processing parameters

SI 32768  
 SF 125.7578503 MHz  
 WDW EM  
 SSB 0  
 LB No filename specified  
 GB 0  
 PC 1.40

<sup>13</sup>CNMR of **Compound-2h** in DMSO-d<sub>6</sub>

## Elemental Composition Report

Page 1

### Single Mass Analysis

Tolerance = 1000.0 PPM / DBE: min = -1.5, max = 50.0

Selected filters: None

Monoisotopic Mass, Even Electron Ions

203 formula(e) evaluated with 1 results within limits (up to 1 closest results for each mass)

Elements Used:

C: 0-24 H: 0-24 N: 0-4 O: 0-6 S: 0-2 Cl: 0-1

GVB-SK39-01

511702A2304 9 (0.137) AM (Top,4, Ar,5000.0,195.52,1.00,LS 10); Sm (Mn, 2x1.00); Sb (1,40.00 )

1: TOF MS ES+  
315

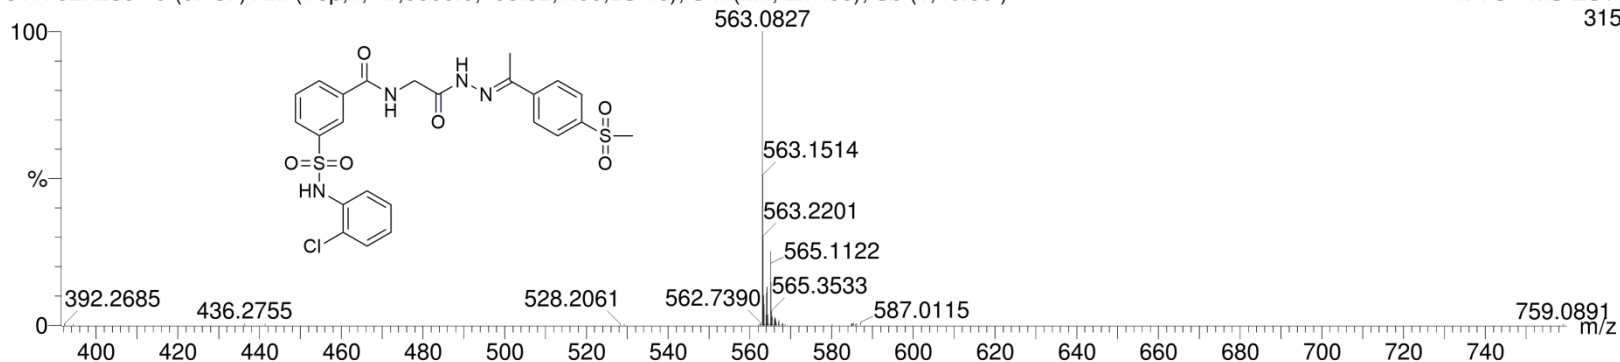

Minimum: -1.5

Maximum: 5.0 1000.0 50.0

| Mass     | Calc. Mass | mDa | PPM | DBE  | i-FIT | Formula             |
|----------|------------|-----|-----|------|-------|---------------------|
| 563.0827 | 563.0826   | 0.1 | 0.2 | 14.5 | 26.5  | C24 H24 N4 O6 S2 Cl |

### HRMS of Compound-2h

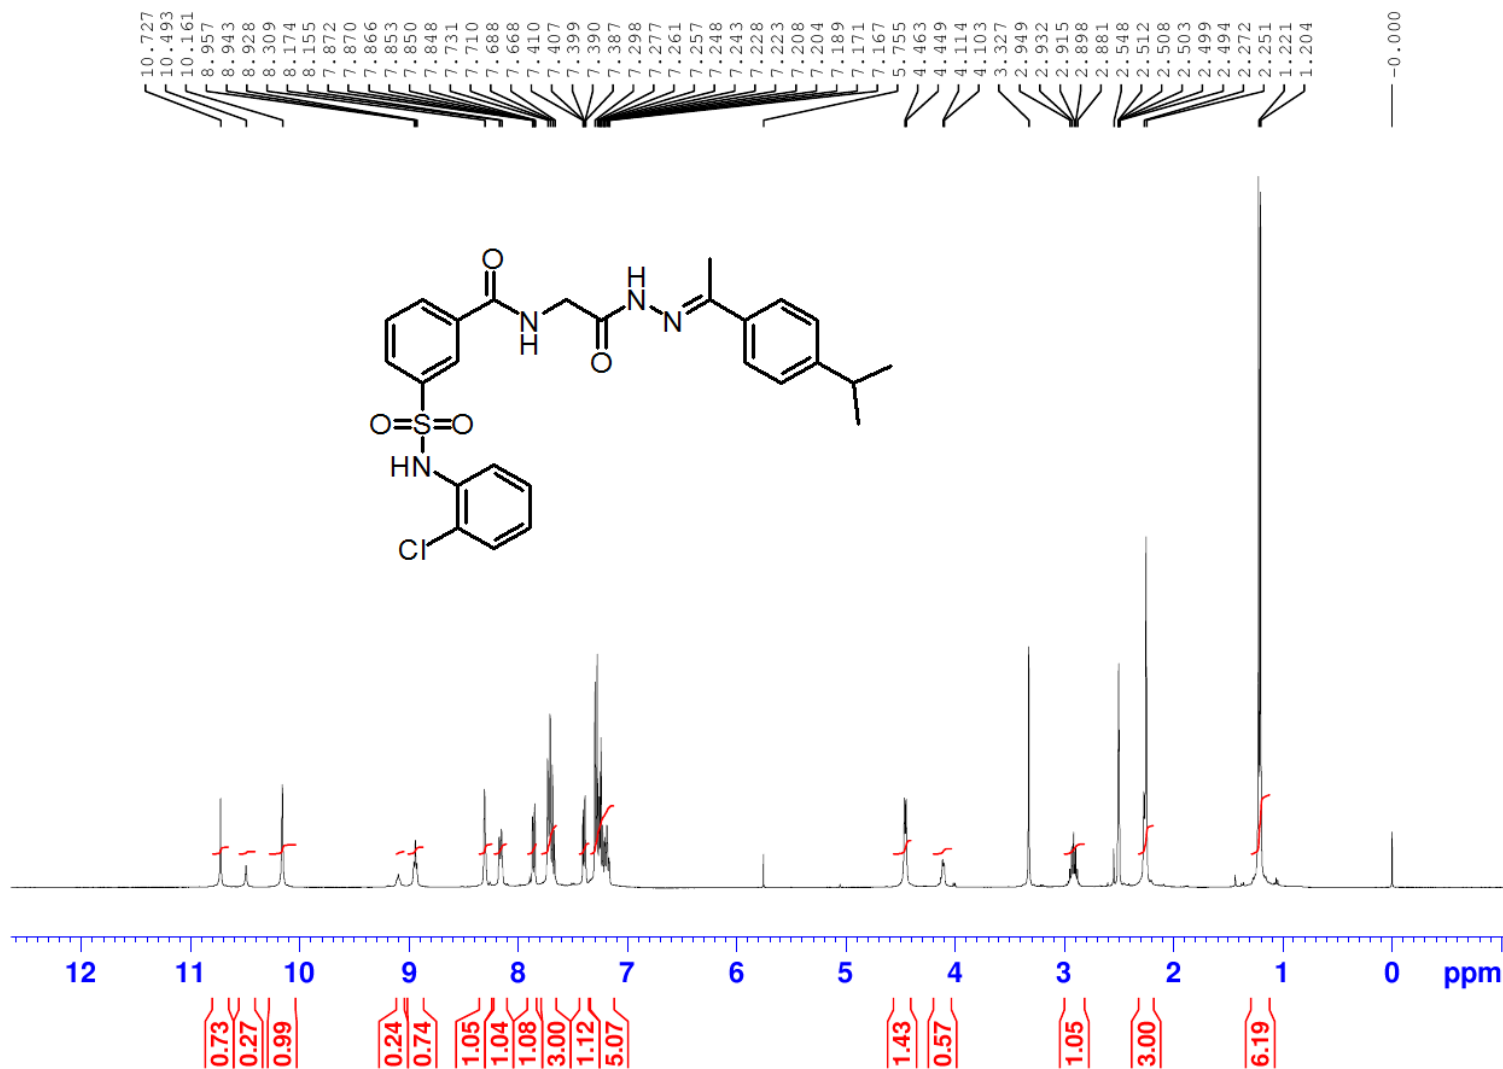

Current Data Parameters  
NAME 511612B0610  
EXPNO 1  
PROCNO 1

F2 - Acquisition Parameters  
Date\_ 20170105  
Time 6.29  
INSTRUM spect  
PROBHD 5 mm PABBO BB/  
PULPROG zg30  
TD 65536  
SOLVENT DMSO  
NS 16  
DS 2  
SWH 8012.820 Hz  
FIDRES 0.122266 Hz  
AQ 4.0894465 sec  
RG 86.08  
DW 62.400 usec  
DE 6.50 usec  
TE 299.6 K  
D1 1.00000000 sec  
TD0 1

===== CHANNEL f1 =====  
SFO1 400.1324710 MHz  
NUC1 1H  
P1 9.75 usec  
PLW1 16.00000000 W

F2 - Processing parameters  
SI 65536  
SF 400.1300021 MHz  
WDW EM  
SSB 0  
LB 0.30 Hz  
GB 0  
PC 1.00

ANL-MCL5-NMR-001

<sup>1</sup>H NMR of Compound-2i in DMSO-d<sub>6</sub>

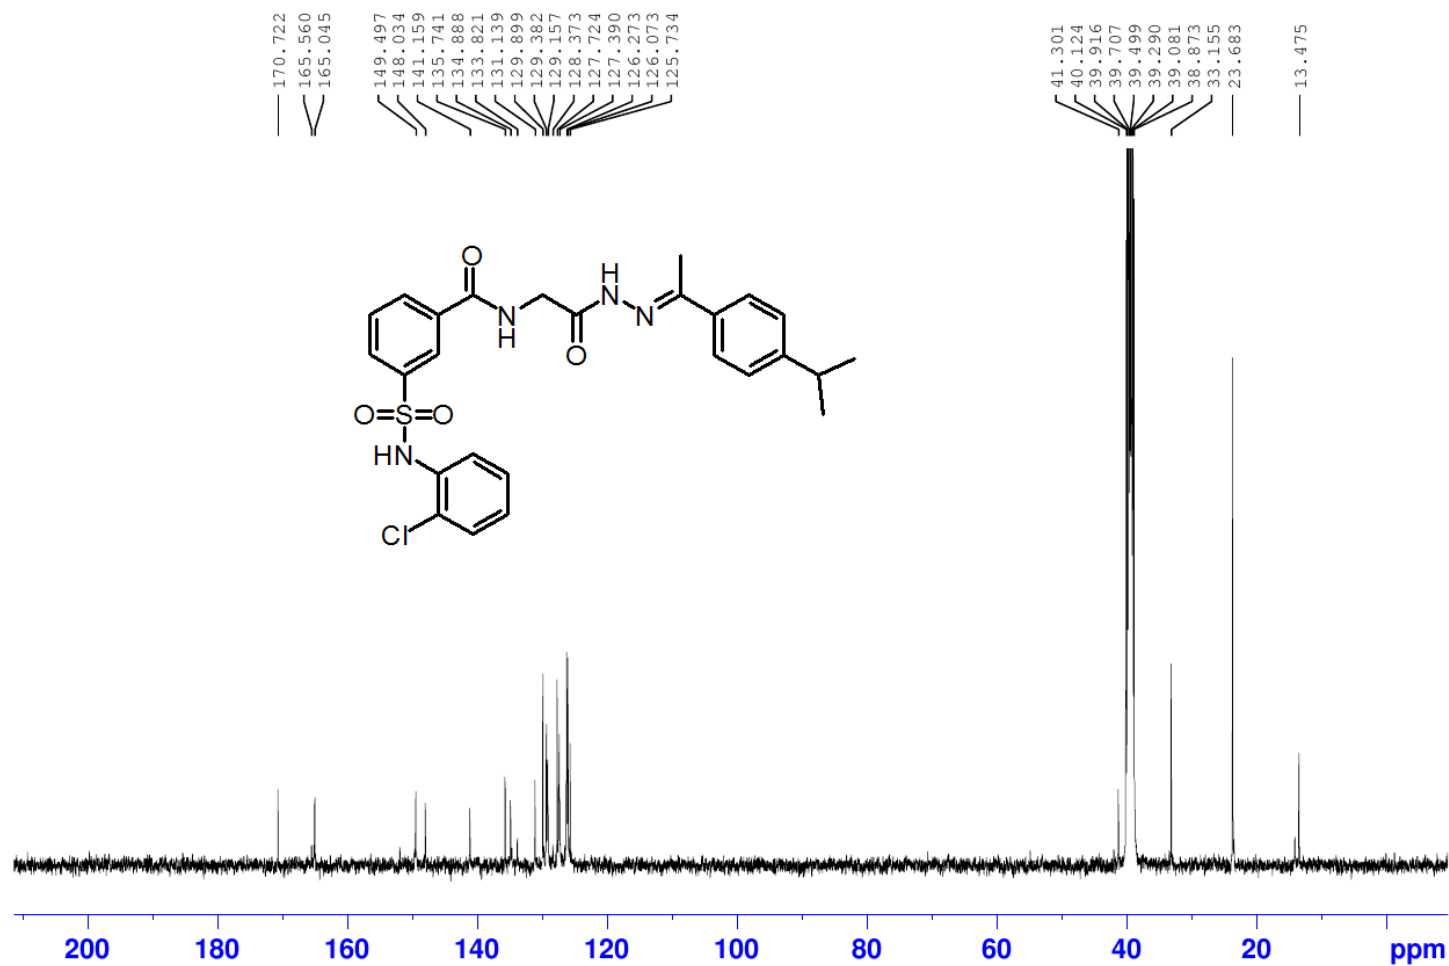

Current Data Parameters  
NAME 511612B0610  
EXPNO 2  
PROCNO 1

F2 - Acquisition Parameters  
Date\_ 20170105  
Time 7.03  
INSTRUM spect  
PROBHD 5 mm PABBO BB/  
PULPROG zgpg30  
TD 65536  
SOLVENT DMSO  
NS 1024  
DS 4  
SWH 24038.461 Hz  
FIDRES 0.366798 Hz  
AQ 1.3631488 sec  
RG 195.29  
DW 20.800 usec  
DE 6.50 usec  
TE 300.0 K  
D1 3.00000000 sec  
D11 0.03000000 sec  
TD0 1

===== CHANNEL f1 =====  
SFO1 100.6228293 MHz  
NUC1 13C  
P1 10.00 usec  
PLW1 78.00000000 W

===== CHANNEL f2 =====  
SFO2 400.1316005 MHz  
NUC2 1H  
CPDPRG[2] waltz16  
PCPD2 90.00 usec  
PLW2 16.00000000 W  
PLW12 0.18777999 W  
PLW13 0.15210000 W

F2 - Processing parameters  
SI 32768  
SF 100.6128199 MHz  
WDW EM  
SSB 0  
LB 2.00 Hz  
GB 0  
PC 1.40

ANL-MCL5-NMR-001

<sup>13</sup>CNMR of Compound-2i in DMSO-d<sub>6</sub>



GVB-SK40-01

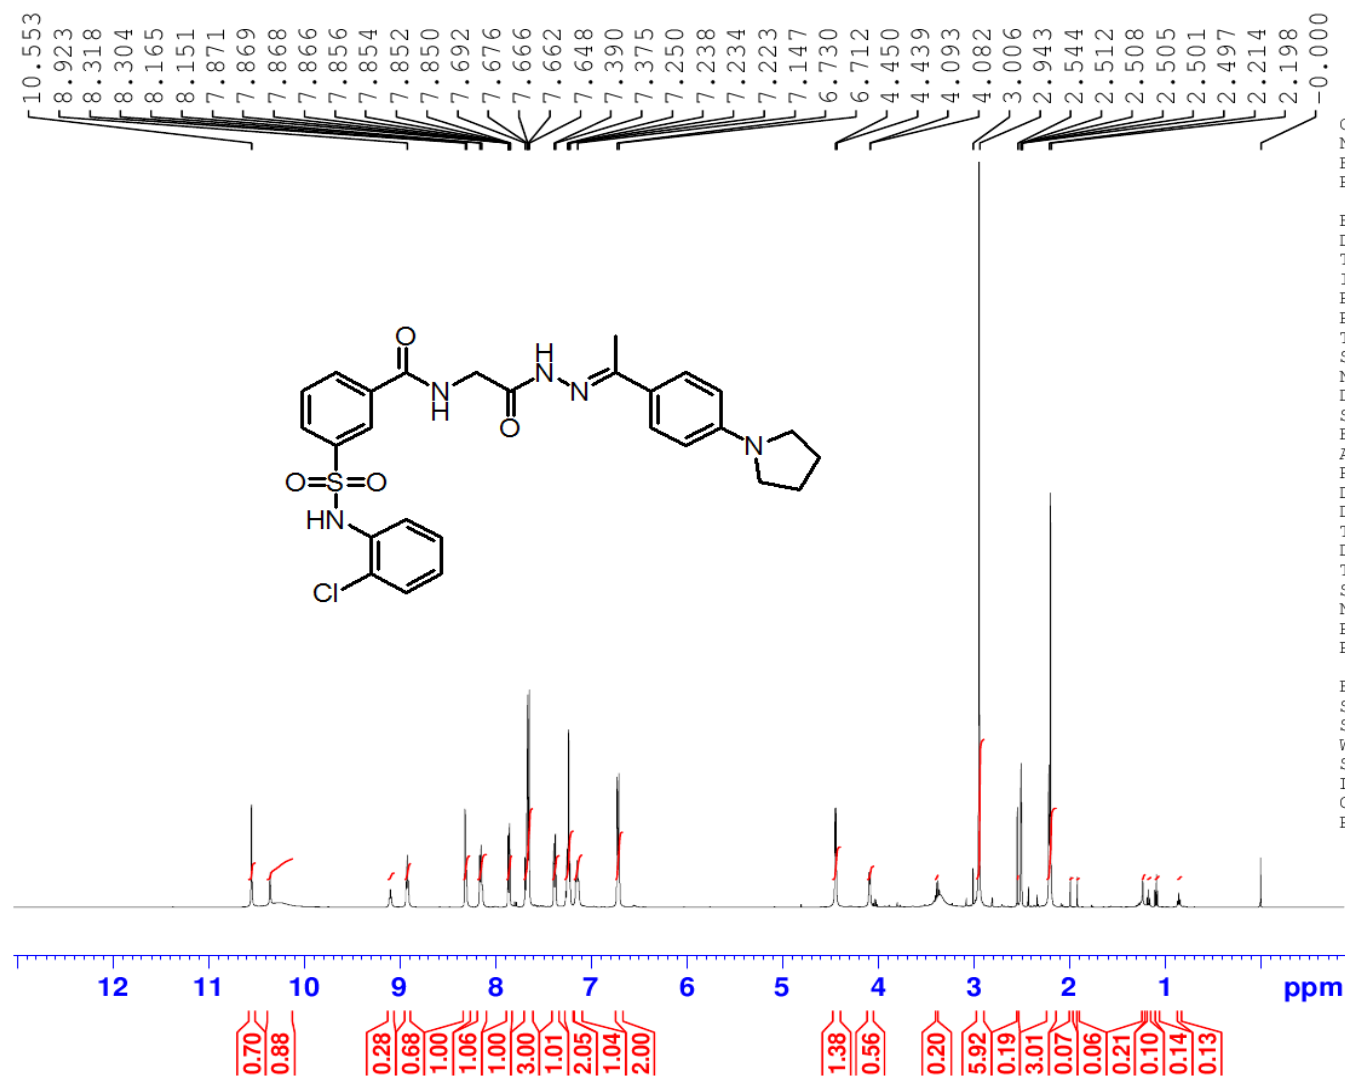

Current Data Parameters  
NAME 511701C3030  
EXPNO 1  
PROCNO 1

F2 - Acquisition Parameters  
Date\_ 20170126  
Time 21.34 h  
INSTRUM spect  
PROBHD z119470\_0231 (  
PULPROG zg30  
TD 65536  
SOLVENT DMSO  
NS 8  
DS 0  
SWH 10000.000 Hz  
FIDRES 0.305176 Hz  
AQ 3.2767999 sec  
RG 69.27  
DW 50.000 usec  
DE 6.50 usec  
TE 298.1 K  
D1 1.00000000 sec  
TD0 1  
SFO1 500.1330885 MHz  
NUC1 1H  
P1 8.75 usec  
PLW1 23.00000000 W

F2 - Processing parameters  
SI 65536  
SF 500.1300014 MHz  
WDW EM  
SSB 0  
LB 0.30 Hz  
GB 0  
PC 1.00

<sup>1</sup>H NMR of **Compound-2j** in DMSO-d<sub>6</sub>

GVB-SK40-01

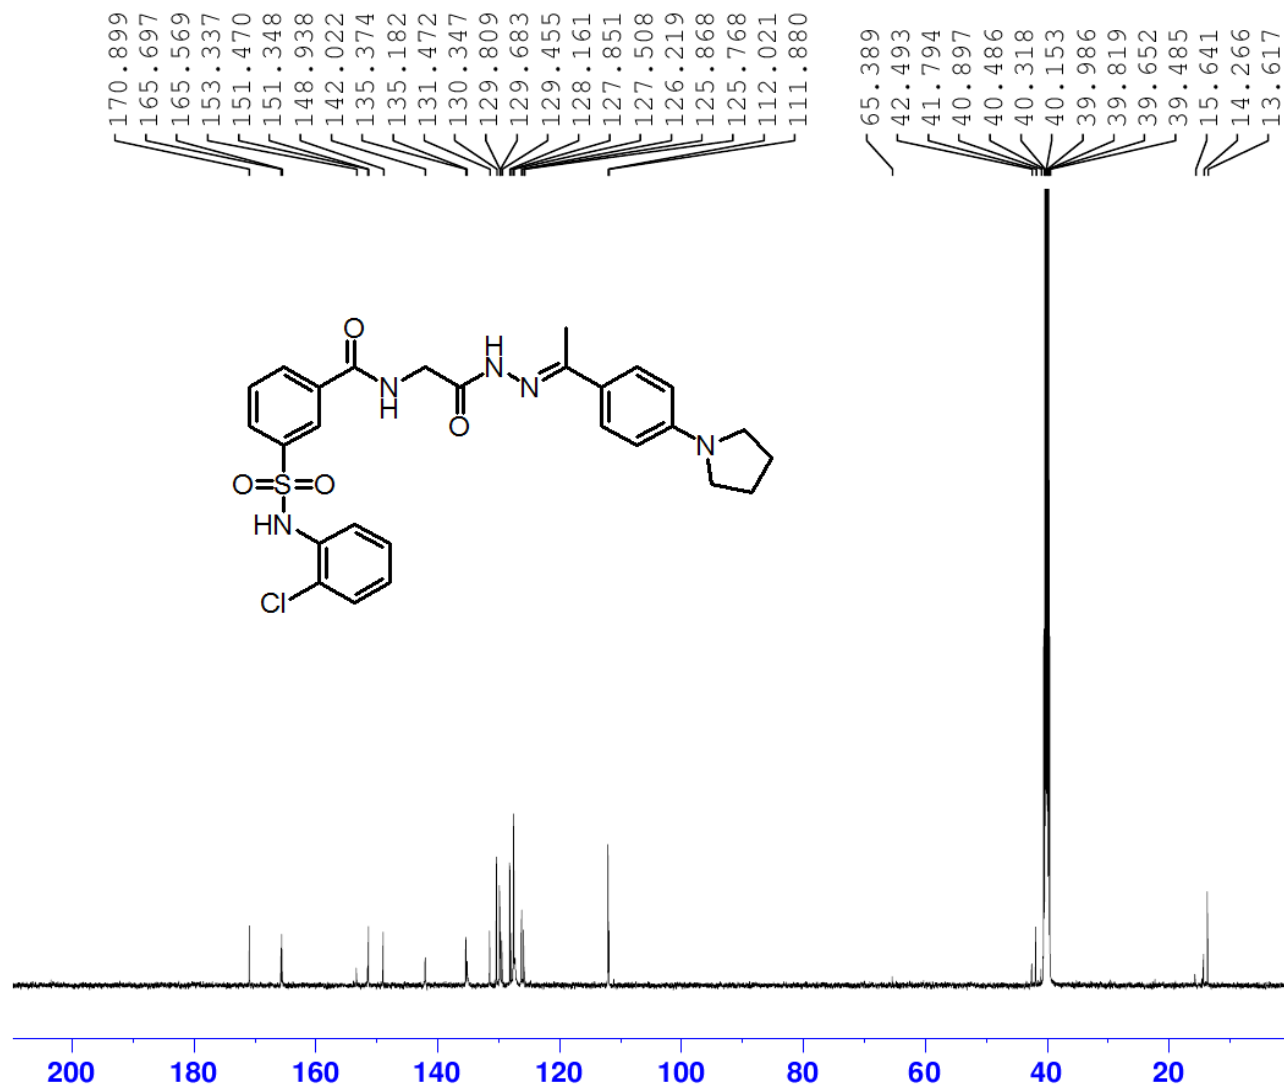

Current Data Parameters  
 NAME 511701C3030  
 EXPNO 2  
 PROCNO 1

F2 - Acquisition Parameters  
 Date\_ 20170126  
 Time 22.46 h  
 INSTRUM spect  
 PROBHD Z119470\_0231 (  
 PULPROG zgpg30  
 TD 65536  
 SOLVENT DMSO  
 NS 1024  
 DS 4  
 SWH 29761.904 Hz  
 FIDRES 0.908261 Hz  
 AQ 1.1010048 sec  
 RG 197.72  
 DW 16.800 usec  
 DE 6.50 usec  
 TE 298.2 K  
 D1 3.00000000 sec  
 D11 0.03000000 sec  
 TD0 1  
 SFO1 125.7703643 MHz  
 NUC1 13C  
 P1 9.50 usec  
 PLW1 88.00000000 W  
 SFO2 500.1320005 MHz  
 NUC2 1H  
 CPDPRG[2] waltz16  
 PCPD2 80.00 usec  
 PLW2 23.00000000 W  
 PLW12 0.27515000 W  
 PLW13 0.13840000 W

F2 - Processing parameters  
 SI 32768  
 SF 125.7577885 MHz  
 WDW EM  
 SSB 0  
 LB No filename specified  
 GB 0  
 PC 1.40

<sup>13</sup>CNMR of Compound-2j in DMSO-d<sub>6</sub>

## Elemental Composition Report

Page 1

### Single Mass Analysis

Tolerance = 1000.0 PPM / DBE: min = -1.5, max = 50.0

Selected filters: None

Monoisotopic Mass, Even Electron Ions

113 formula(e) evaluated with 1 results within limits (up to 1 closest results for each mass)

Elements Used:

C: 0-27 H: 0-29 N: 0-5 O: 0-4 S: 0-1 Cl: 0-1

GVB-SK40

511702A2314 9 (0.136) AM (Top,4, Ar,5000.0,195.51,1.00,LS 10); Sm (Mn, 2x1.00); Sb (1,40.00)

1: TOF MS ES+  
641

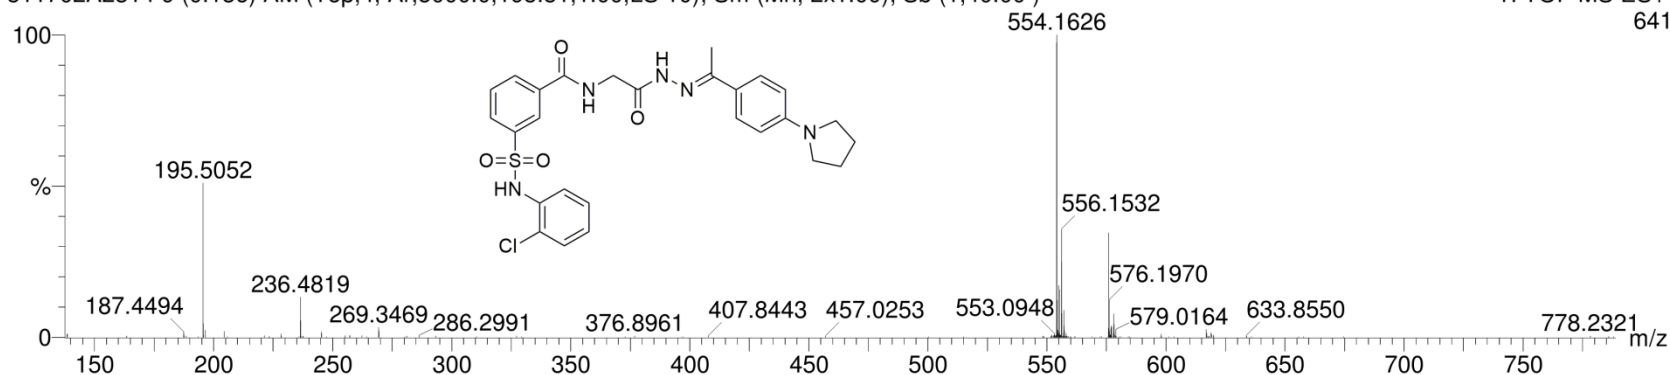

Minimum: -1.5  
Maximum: 5.0 1000.0 50.0

| Mass     | Calc. Mass | mDa  | PPM  | DBE  | i-FIT | Formula                                                            |
|----------|------------|------|------|------|-------|--------------------------------------------------------------------|
| 554.1626 | 554.1629   | -0.3 | -0.5 | 15.5 | 31.4  | C <sub>27</sub> H <sub>29</sub> N <sub>5</sub> O <sub>4</sub> S Cl |

### HRMS of Compound-2J

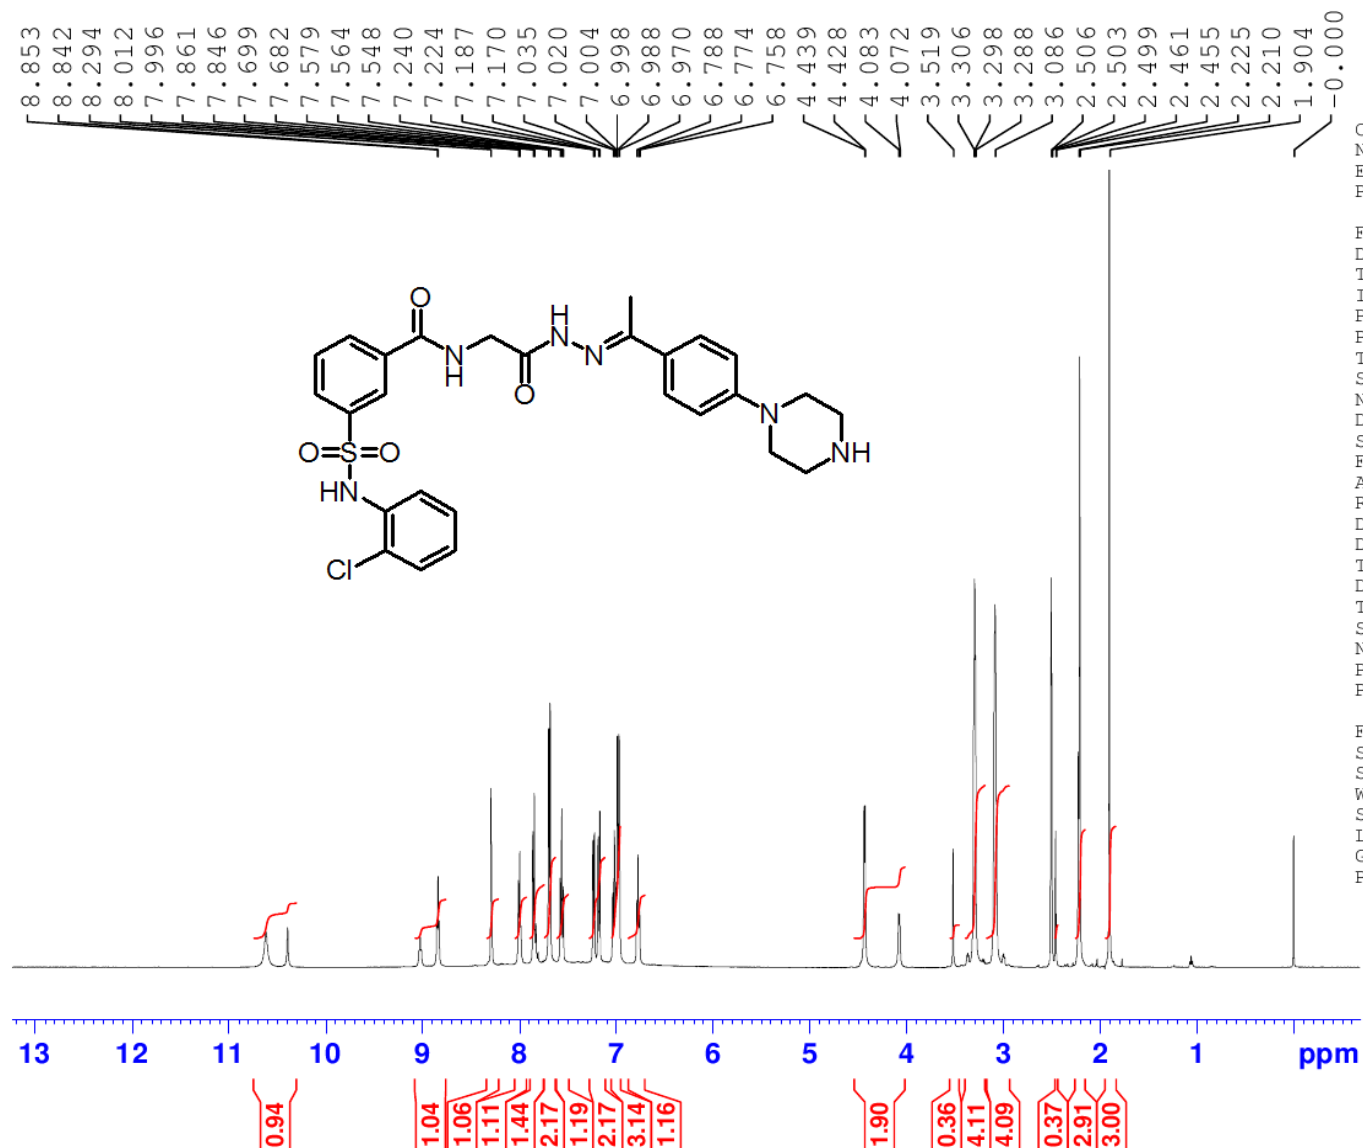

Current Data Parameters  
 NAME 511612B0608  
 EXPNO 1  
 PROCNO 1

F2 - Acquisition Parameters  
 Date\_ 20170103  
 Time 20.57 h  
 INSTRUM spect  
 PROBHD Z119470\_0231 (  
 PULPROG zg30  
 TD 65536  
 SOLVENT DMSO  
 NS 8  
 DS 0  
 SWH 10000.000 Hz  
 FIDRES 0.305176 Hz  
 AQ 3.2767999 sec  
 RG 69.27  
 DW 50.000 usec  
 DE 6.50 usec  
 TE 298.2 K  
 D1 1.00000000 sec  
 TD0 1  
 SFO1 500.1330885 MHz  
 NUC1 1H  
 P1 8.75 usec  
 PLW1 23.00000000 W

F2 - Processing parameters  
 SI 65536  
 SF 500.1300027 MHz  
 WDW EM  
 SSB 0  
 LB 0.30 Hz  
 GB 0  
 PC 1.00

<sup>1</sup>H NMR of **Compound-2k** in DMSO-d<sub>6</sub>

GVB-SK-41

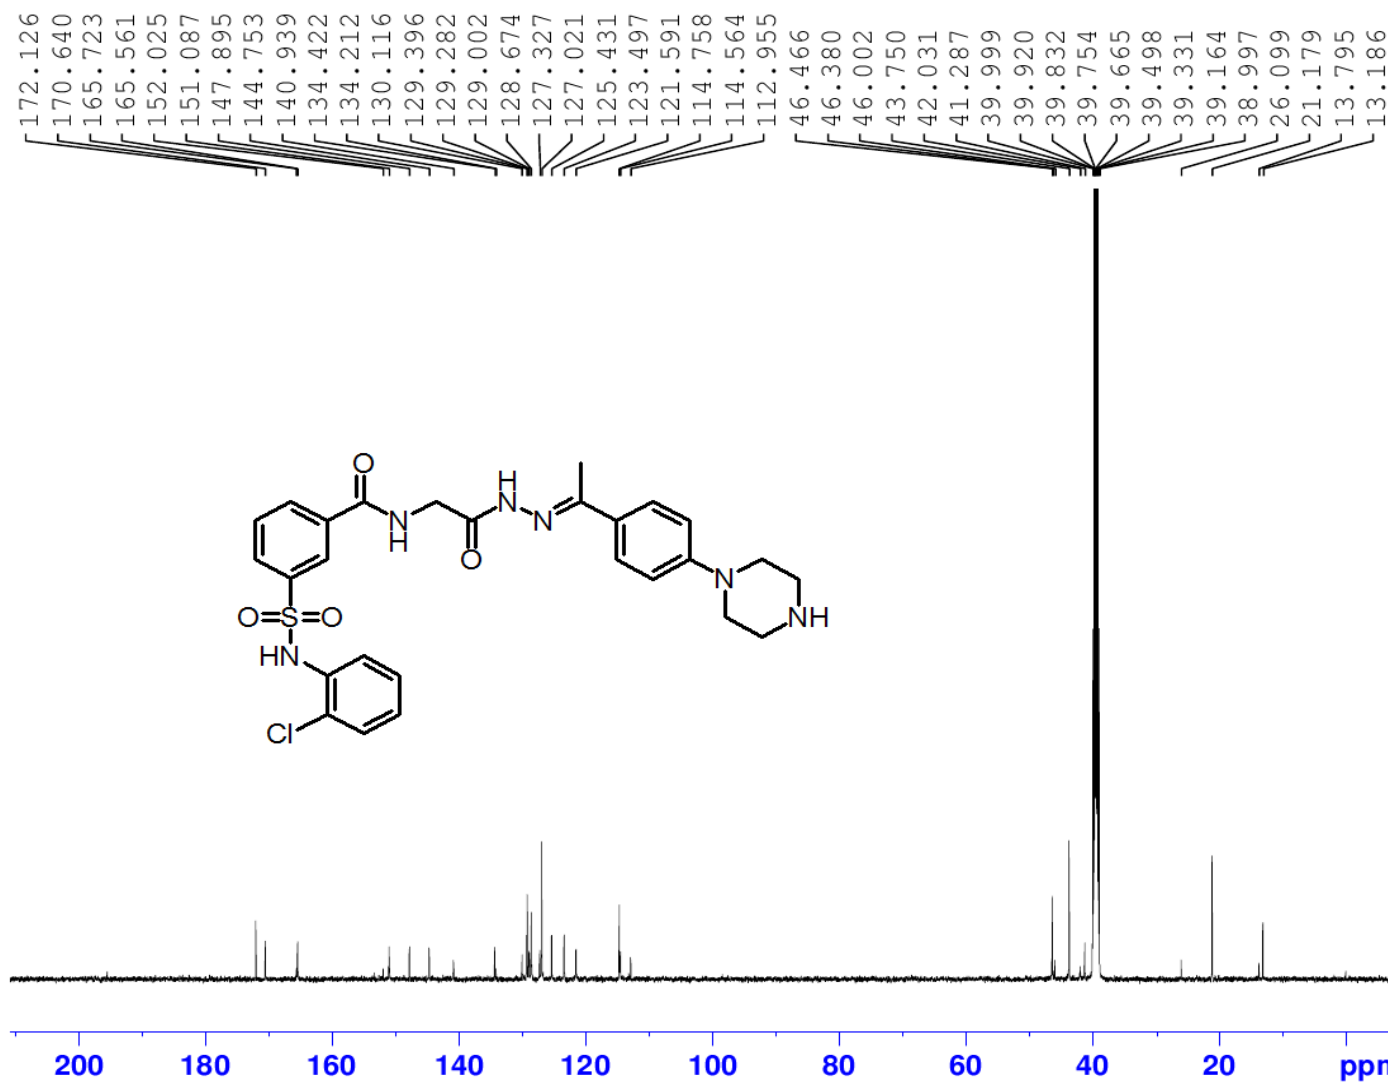

Current Data Parameters  
NAME 511612B0608  
EXPNO 2  
PROCNO 1

F2 - Acquisition Parameters  
Date\_ 20170104  
Time 2.30 h  
INSTRUM spect  
PROBHD Z119470\_0231 (  
PULPROG zgpg30  
TD 65536  
SOLVENT DMSO  
NS 1024  
DS 4  
SWH 29761.904 Hz  
FIDRES 0.908261 Hz  
AQ 1.1010048 sec  
RG 197.72  
DW 16.800 usec  
DE 6.50 usec  
TE 298.4 K  
D1 3.00000000 sec  
D11 0.03000000 sec  
TD0 1  
SFO1 125.7703643 MHz  
NUC1 13C  
P1 9.50 usec  
PLW1 88.00000000 W  
SFO2 500.1320005 MHz  
NUC2 1H  
CPDPRG[2] waltz16  
PCPD2 80.00 usec  
PLW2 23.00000000 W  
PLW12 0.27515000 W  
PLW13 0.13840000 W

F2 - Processing parameters  
SI 32768  
SF 125.7578501 MHz  
WDW EM  
SSB 0  
LB 2.00 Hz  
GB 0  
PC 1.40

<sup>13</sup>CNMR of **Compound-2k** in DMSO-d<sub>6</sub>

## Elemental Composition Report

Page 1

### Single Mass Analysis

Tolerance = 1000.0 PPM / DBE: min = -1.5, max = 50.0

Selected filters: None

Monoisotopic Mass, Even Electron Ions

133 formula(e) evaluated with 1 results within limits (up to 1 closest results for each mass)

Elements Used:

C: 0-27 H: 0-30 N: 0-6 O: 0-4 S: 0-1 Cl: 0-1

SAMPLE CODE: COMPOUND-41

511701A5134 32 (0.462) AM (Top,4, Ar,5000.0,195.17,1.00,LS 5); Sm (Mn, 2x1.00); Sb (1,40.00)

1: TOF MS ES+  
4.19e3

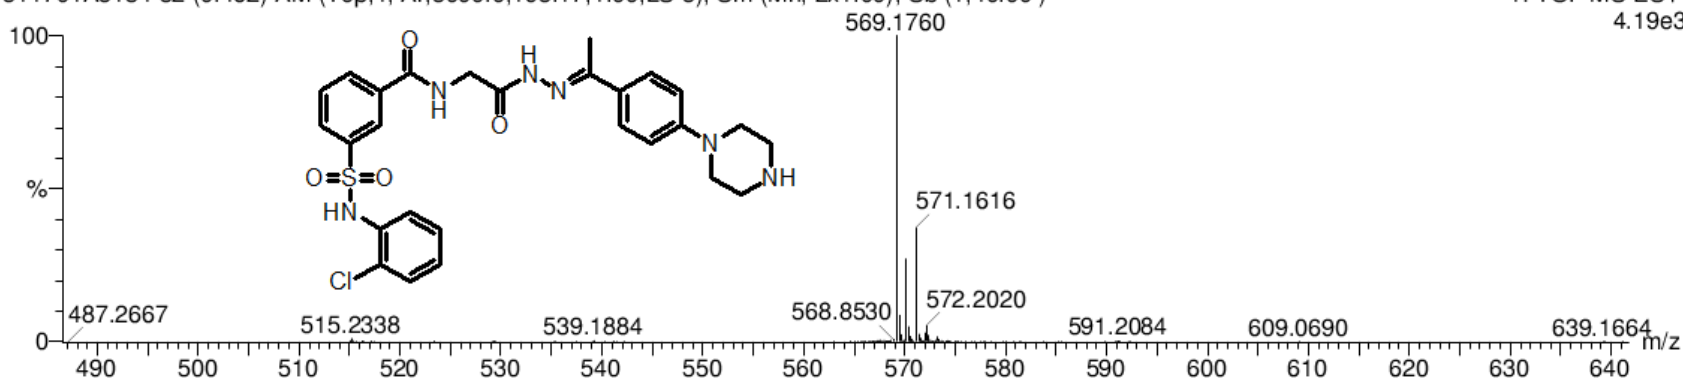

Minimum: -1.5  
Maximum: 5.0 1000.0 50.0

| Mass     | Calc. Mass | mDa | PPM | DBE  | i-FIT | Formula                                                            |
|----------|------------|-----|-----|------|-------|--------------------------------------------------------------------|
| 569.1760 | 569.1738   | 2.2 | 3.9 | 15.5 | 30.6  | C <sub>27</sub> H <sub>30</sub> N <sub>6</sub> O <sub>4</sub> S Cl |

HRMS of Compound-2K

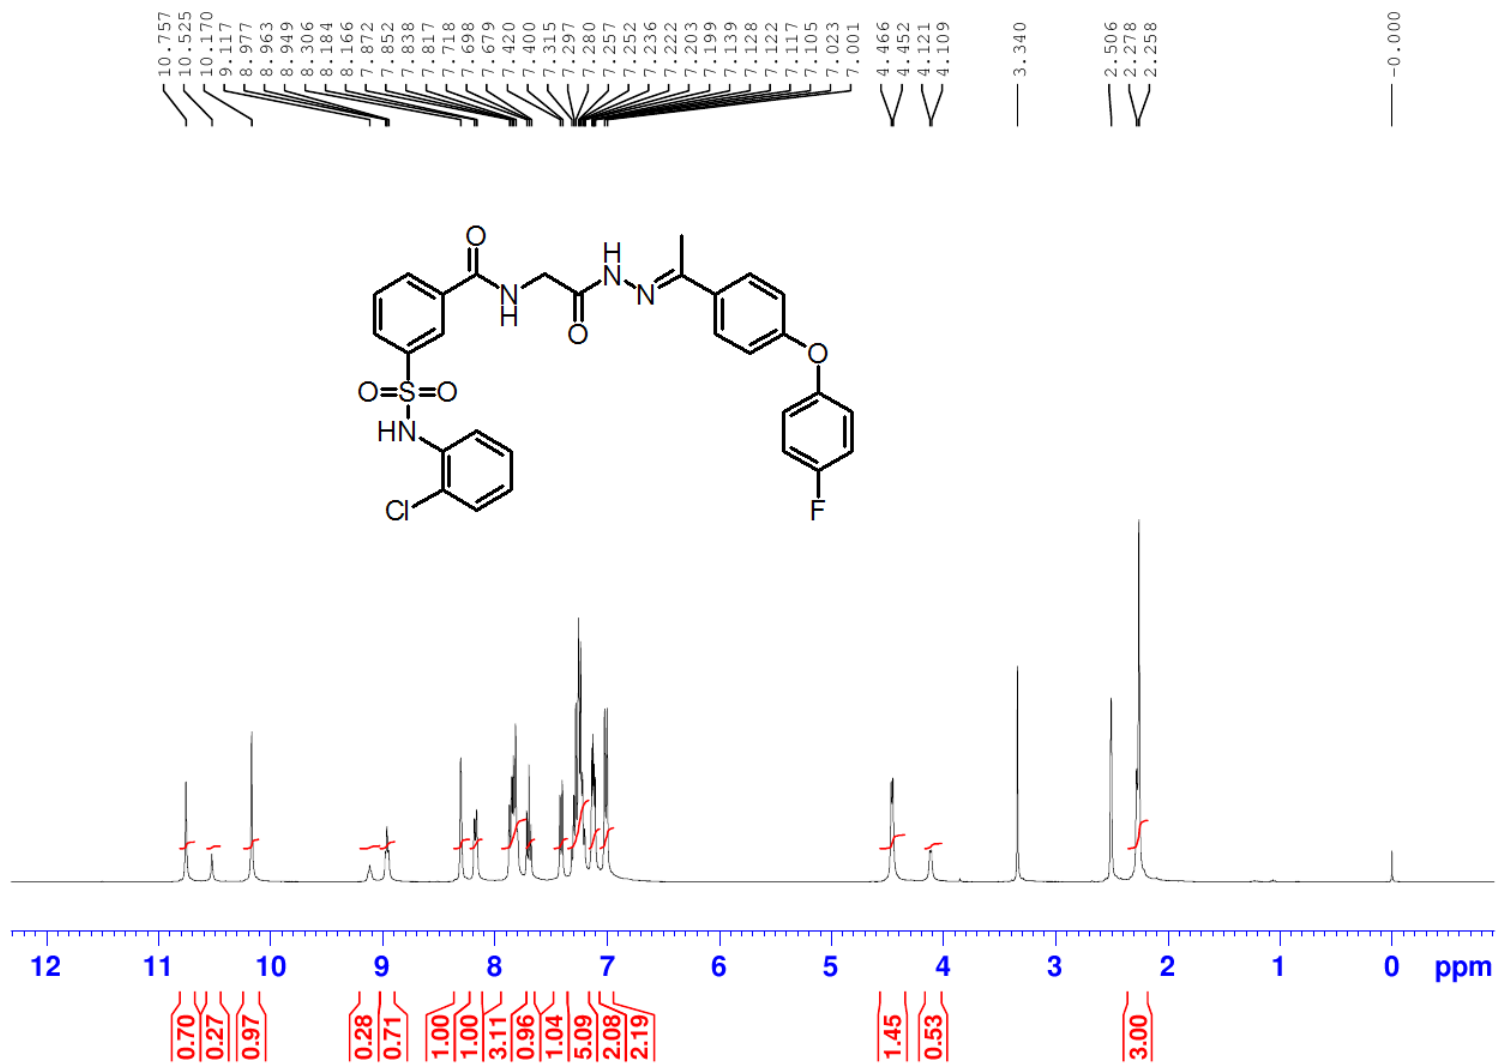

Current Data Parameters  
 NAME 511612B0605  
 EXPNO 1  
 PROCNO 1

F2 - Acquisition Parameters  
 Date\_ 20170104  
 Time 21.29  
 INSTRUM spect  
 PROBHD 5 mm PABBO BB/  
 PULPROG zg30  
 TD 65536  
 SOLVENT DMSO  
 NS 16  
 DS 2  
 SWH 8012.820 Hz  
 FIDRES 0.122266 Hz  
 AQ 4.0894465 sec  
 RG 86.08  
 DW 62.400 usec  
 DE 6.50 usec  
 TE 298.2 K  
 D1 1.00000000 sec  
 TD0 1

===== CHANNEL f1 =====  
 SFO1 400.1324710 MHz  
 NUC1 1H  
 P1 9.75 usec  
 PLW1 16.00000000 W

F2 - Processing parameters  
 SI 65536  
 SF 400.1300008 MHz  
 WDW EM  
 SSB 0  
 LB 0.30 Hz  
 GB 0  
 PC 1.00

ANL-MCL5-NMR-001

<sup>1</sup>H NMR of **Compound-2m** in DMSO-d<sub>6</sub>

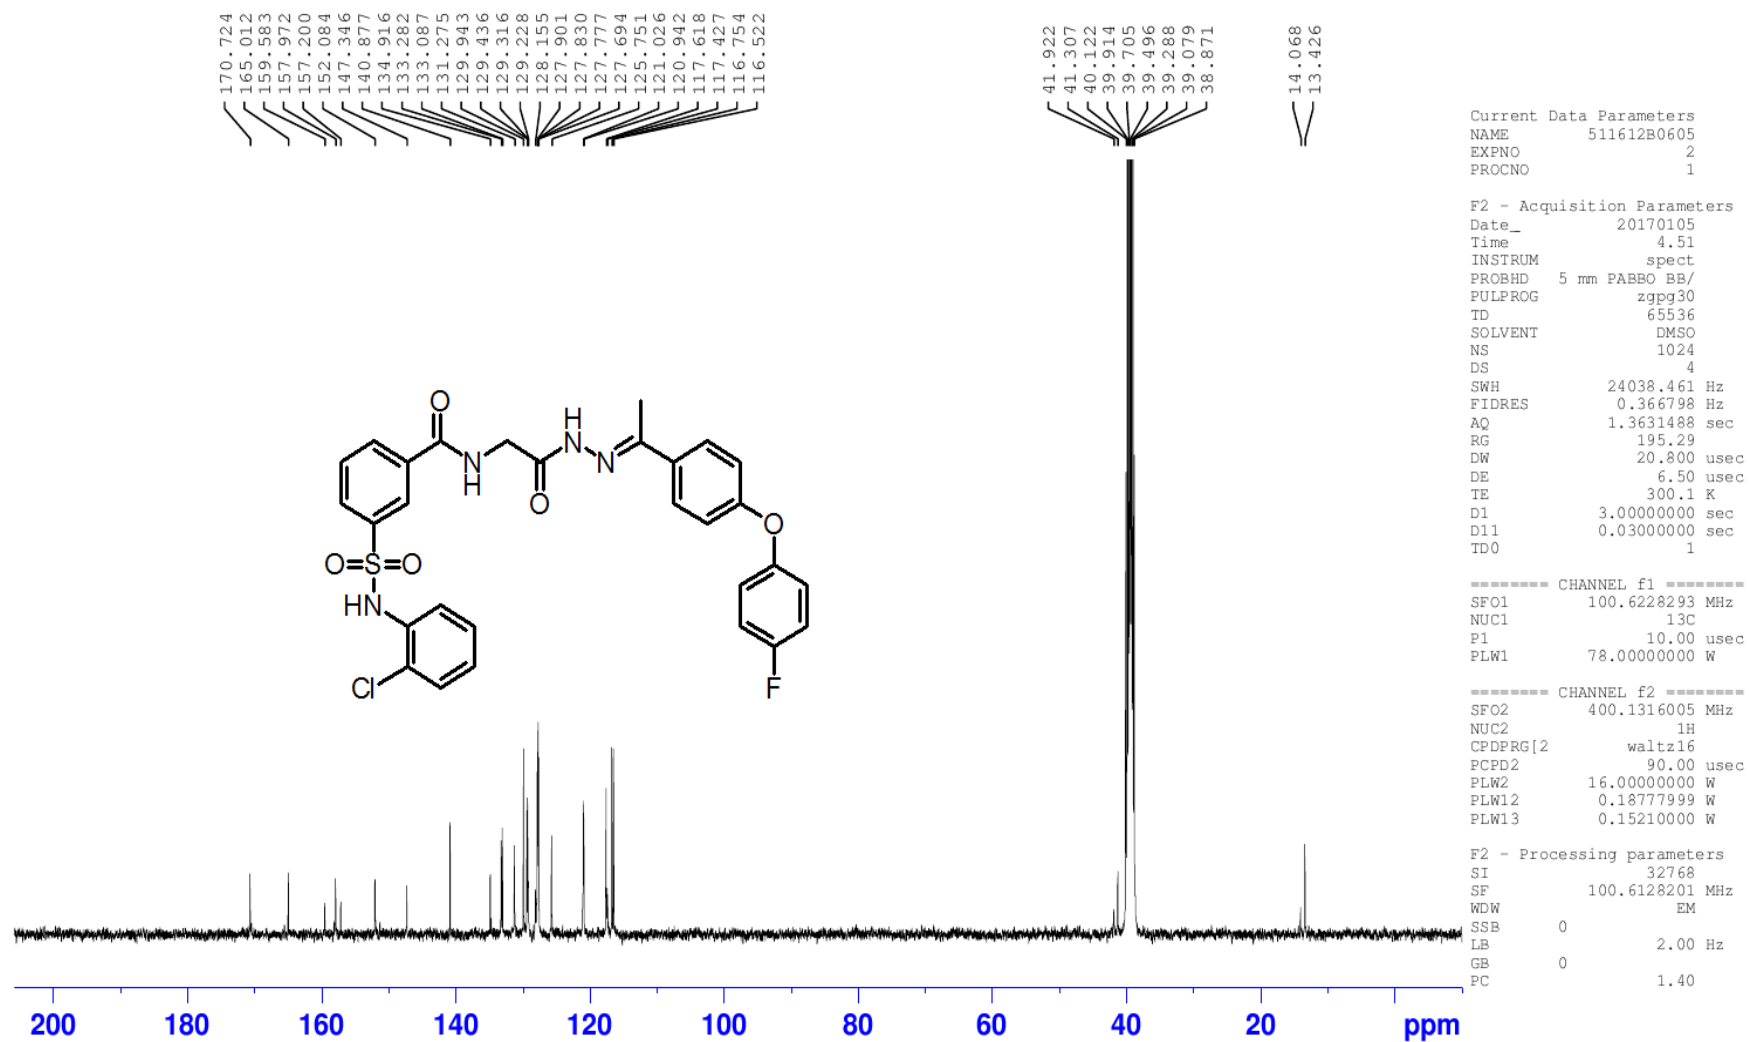

ANL-MCL5-NMR-001

<sup>13</sup>CNMR of **Compound-2m** in DMSO-d<sub>6</sub>



## Elemental Composition Report

Page 1

### Single Mass Analysis

Tolerance = 1000.0 PPM / DBE: min = -1.5, max = 50.0

Selected filters: None

Monoisotopic Mass, Even Electron Ions

226 formula(e) evaluated with 1 results within limits (up to 1 closest results for each mass)

Elements Used:

C: 0-29 H: 0-25 N: 0-4 O: 0-5 F: 0-1 S: 0-1 Cl: 0-1

SAMPLE CODE: COMPOUND-38

511701A5149 28 (0.392) AM (Top,4, Ar,5000.0,195.13,1.00,LS 5); Sm (Mn, 1x1.00); Sb (1,40.00)

1: TOF MS ES+  
1.39e3

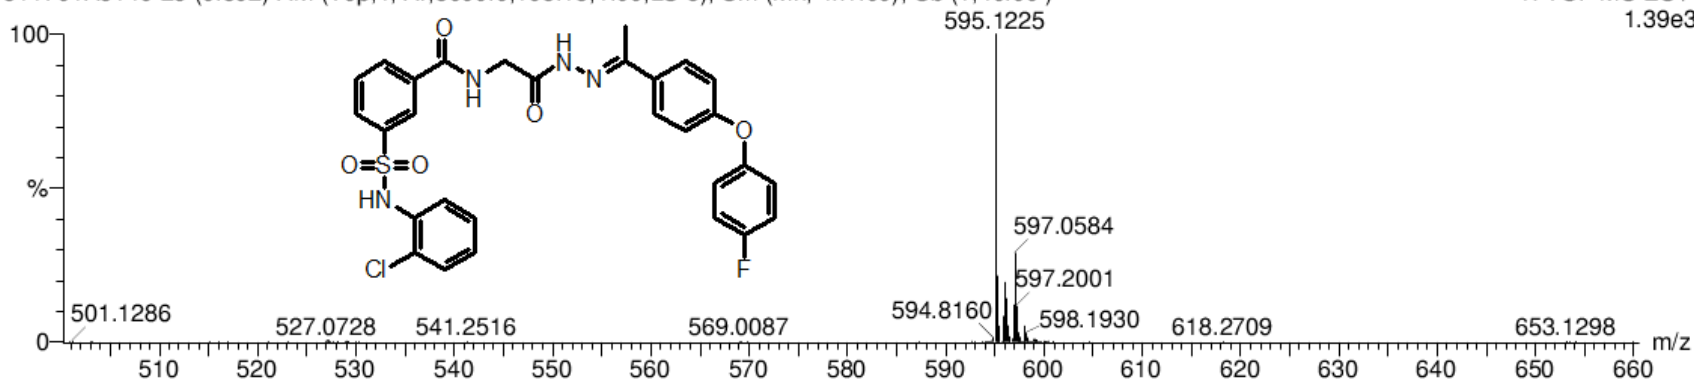

Minimum: -1.5  
Maximum: 5.0 1000.0 50.0

| Mass     | Calc. Mass | mDa | PPM | DBE  | i-FIT | Formula                                                              |
|----------|------------|-----|-----|------|-------|----------------------------------------------------------------------|
| 595.1225 | 595.1218   | 0.7 | 1.2 | 18.5 | 78.0  | C <sub>29</sub> H <sub>25</sub> N <sub>4</sub> O <sub>5</sub> F S Cl |

HRMS of Compound-2m

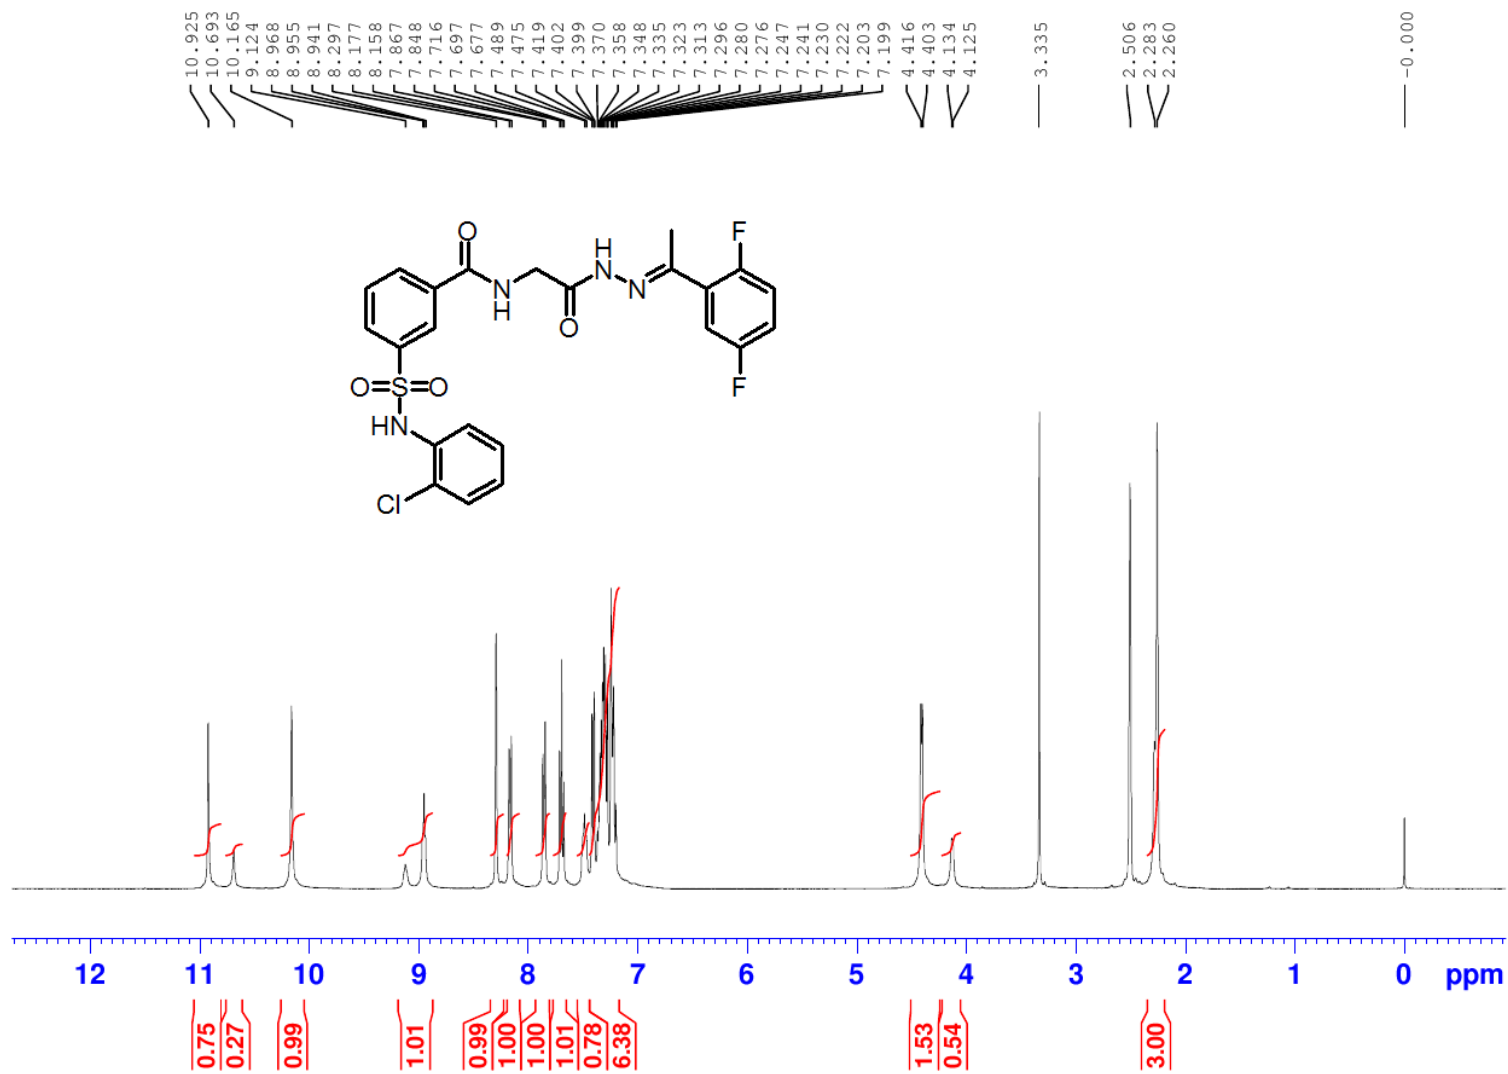

Current Data Parameters  
 NAME 511612B0602  
 EXPNO 1  
 PROCNO 1

F2 - Acquisition Parameters  
 Date\_ 20170104  
 Time 21.21  
 INSTRUM spect  
 PROBHD 5 mm PABBO BB/  
 PULPROG zg30  
 TD 65536  
 SOLVENT DMSO  
 NS 16  
 DS 2  
 SWH 8012.820 Hz  
 FIDRES 0.122266 Hz  
 AQ 4.0894465 sec  
 RG 86.08  
 DW 62.400 usec  
 DE 6.50 usec  
 TE 298.2 K  
 D1 1.00000000 sec  
 TD0 1

===== CHANNEL f1 =====  
 SF01 400.1324710 MHz  
 NUC1 1H  
 P1 9.75 usec  
 PLW1 16.00000000 W

F2 - Processing parameters  
 SI 65536  
 SF 400.1300007 MHz  
 WDW EM  
 SSB 0  
 LB 0.30 Hz  
 GB 0  
 PC 1.00

ANL-MCL5-NMR-001

<sup>1</sup>H NMR of **Compound-2n** in DMSO-d<sub>6</sub>

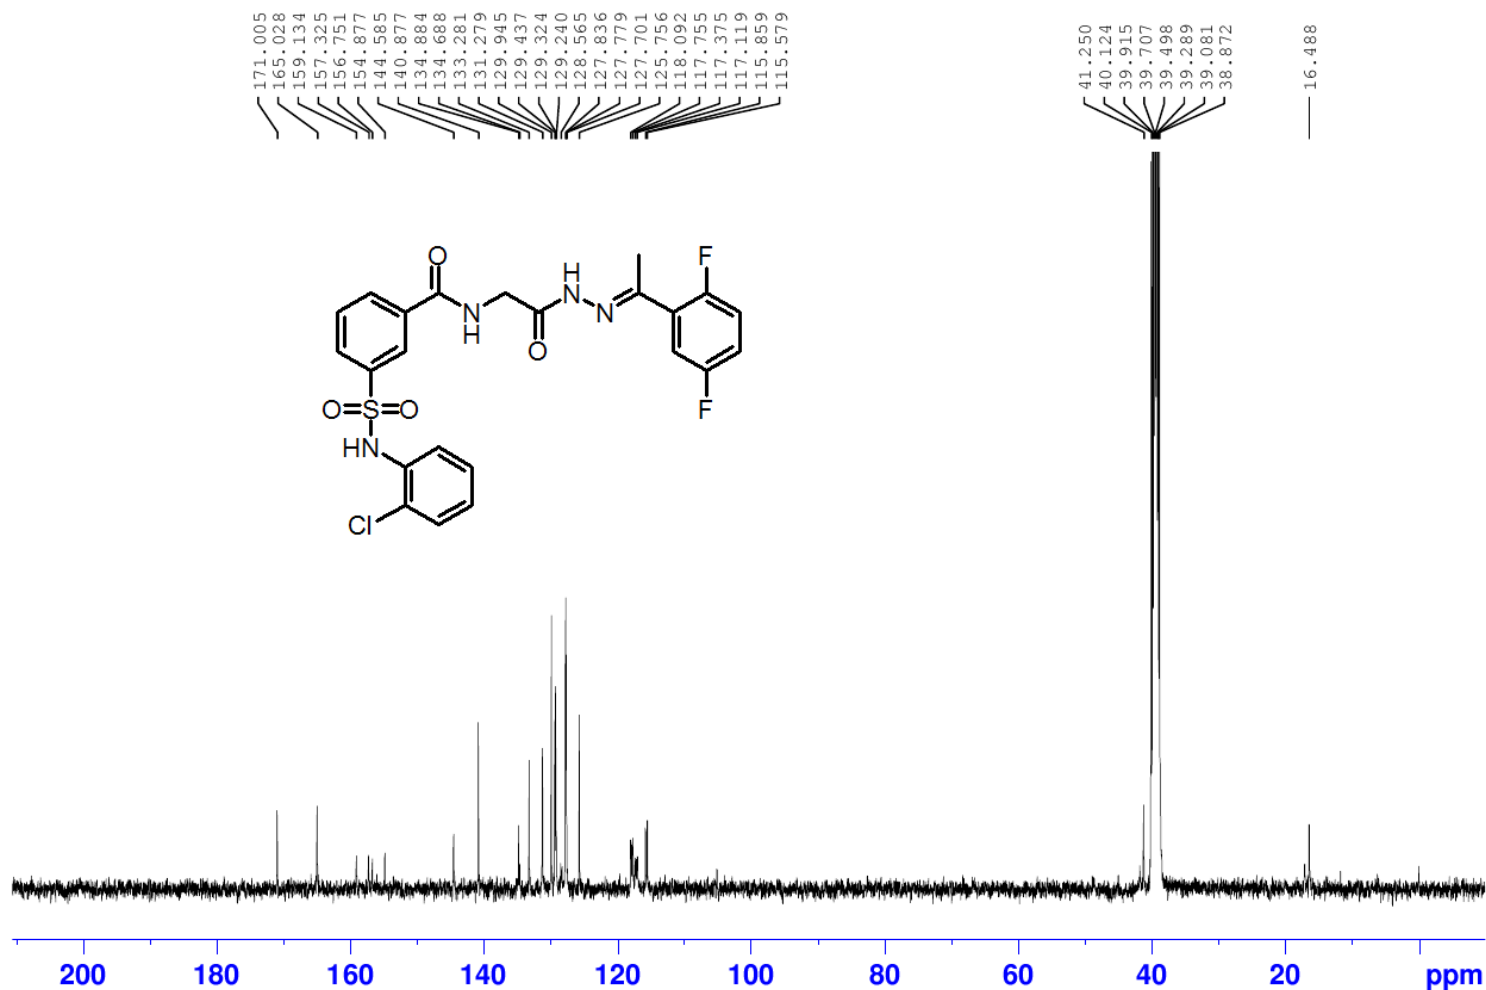

Current Data Parameters  
NAME 511612B0602  
EXPNO 2  
PROCNO 1

F2 - Acquisition Parameters  
Date\_ 20170105  
Time 5.57  
INSTRUM spect  
PROBHD 5 mm PABBO BB/  
PULPROG zgpg30  
TD 65536  
SOLVENT DMSO  
NS 1024  
DS 4  
SWH 24038.461 Hz  
FIDRES 0.366798 Hz  
AQ 1.3631488 sec  
RG 195.29  
DW 20.800 usec  
DE 6.50 usec  
TE 300.1 K  
D1 3.00000000 sec  
D11 0.03000000 sec  
TD0 1

===== CHANNEL f1 =====  
SFO1 100.6228293 MHz  
NUC1 13C  
P1 10.00 usec  
PLW1 78.00000000 W

===== CHANNEL f2 =====  
SFO2 400.1316005 MHz  
NUC2 1H  
CPDPRG[2] waltz16  
PCPD2 90.00 usec  
PLW2 16.00000000 W  
PLW12 0.18777999 W  
PLW13 0.15210000 W

F2 - Processing parameters  
SI 32768  
SF 100.6128199 MHz  
WDW EM  
SSB 0  
LB 2.00 Hz  
GB 0  
PC 1.40

ANL-MCL5-NMR-001

<sup>13</sup>CNMR of **Compound-2n** in DMSO-d<sub>6</sub>

## Elemental Composition Report

Page 1

### Single Mass Analysis

Tolerance = 1000.0 PPM / DBE: min = -1.5, max = 50.0

Selected filters: None

Monoisotopic Mass, Even Electron Ions

337 formula(e) evaluated with 3 results within limits (up to 1 closest results for each mass)

Elements Used:

C: 0-23 H: 0-20 N: 0-4 O: 0-5 S: 0-1 Cl: 0-1 F: 0-2

SAMPLE CODE:COMPOUND-35

511701A5137 15 (0.229) AM (Top,4, Ar,5000.0,195.16,1.00,LS 5); Sm (Mn, 1x1.00); Sb (1,40.00 )

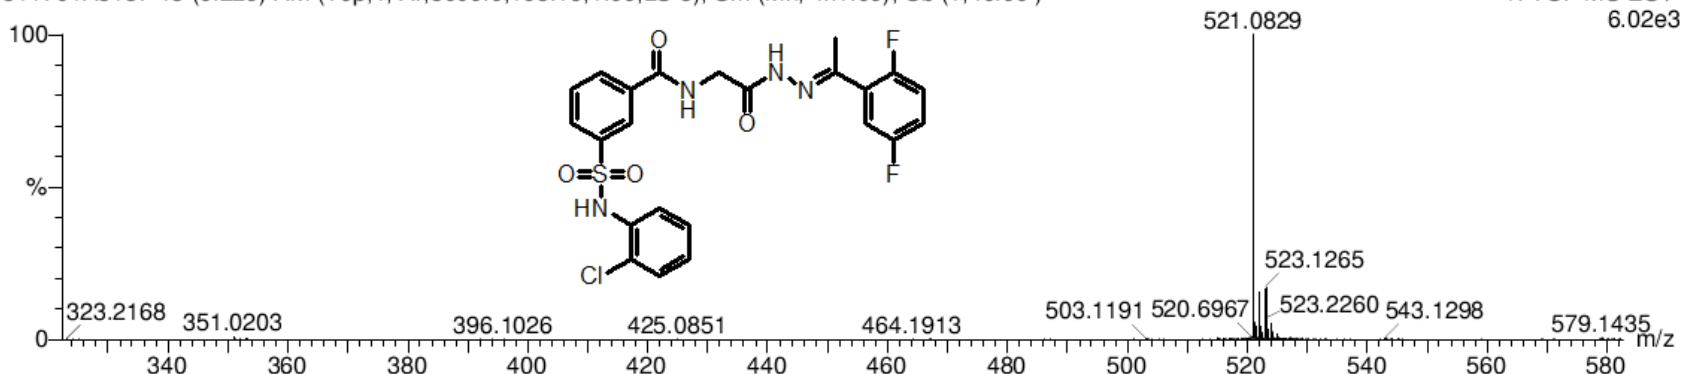

Minimum: -1.5  
Maximum: 5.0 1000.0 50.0

| Mass     | Calc. Mass | mDa  | PPM  | DBE  | i-FIT | Formula               |
|----------|------------|------|------|------|-------|-----------------------|
| 521.0829 | 521.0862   | -3.3 | -6.3 | 14.5 | 579.7 | C23 H20 N4 O4 S Cl F2 |

HRMS of Compound-2n

GVB-SK34-01  
Reference Code: 511702B6519  
Solvent: dms  
Archive directory:  
/home/gvkbio/data/2017/Feb  
Agilent 400-MRDD2  
Data collected on: Feb 17 2017  
Experiment: PROTON

b9994062002

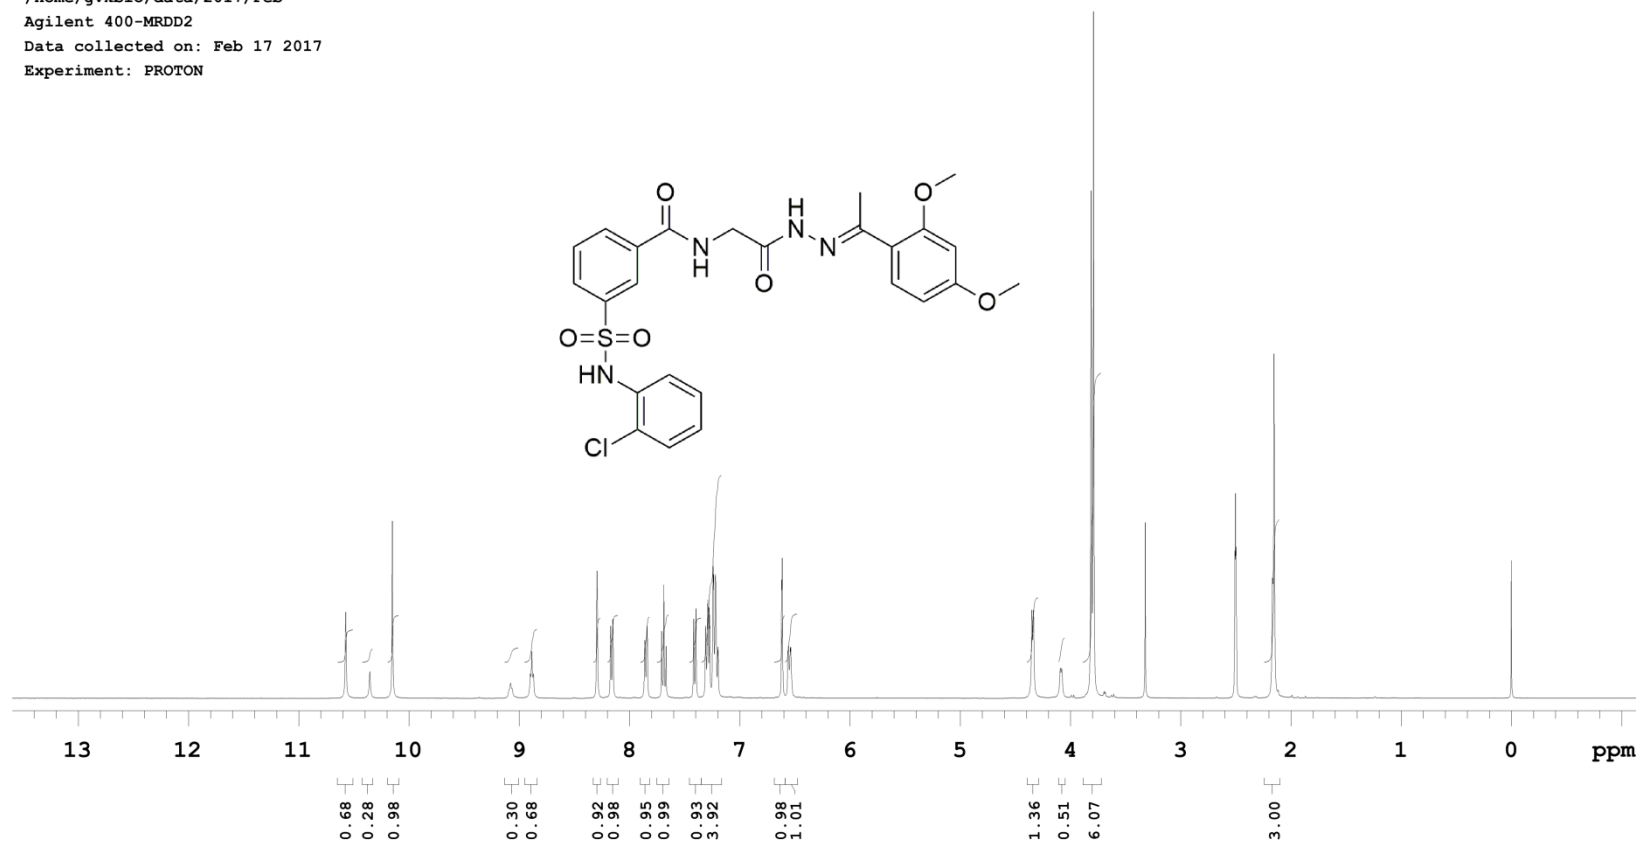

<sup>1</sup>H NMR of **Compound-2o** in DMSO-d<sub>6</sub>

GVB-SK34-01

Reference Code: 511702B6519

Solvent: dms

Archive directory:

/home/gvkbic/data/2017/

Agilent 400-MRDD2

Data collected on: Feb 17 2017

Experiment: CARBON

431c2612004

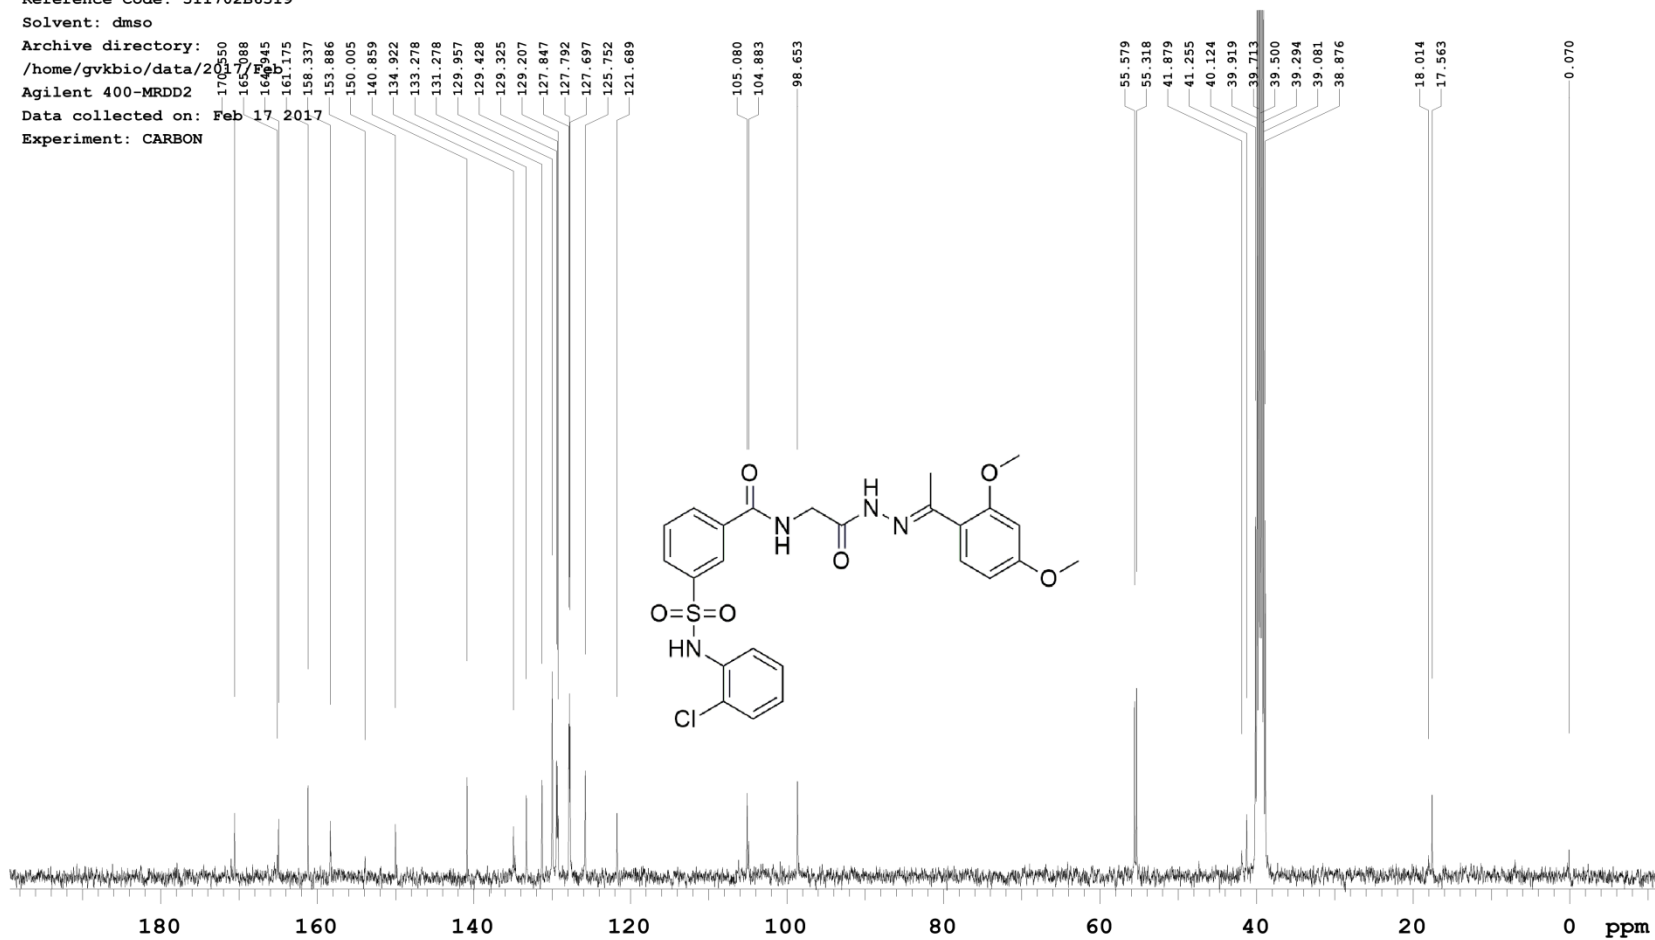

Plotname: 511702B6519\_CARBON\_01.REC\_plot01

<sup>13</sup>CNMR of **Compound-2o** in DMSO-d<sub>6</sub>

## Elemental Composition Report

Page 1

### Single Mass Analysis

Tolerance = 1000.0 PPM / DBE: min = -1.5, max = 50.0

Selected filters: None

Monoisotopic Mass, Even Electron Ions

133 formula(e) evaluated with 1 results within limits (up to 1 closest results for each mass)

Elements Used:

C: 0-25 H: 0-26 N: 0-4 O: 0-6 S: 0-1 Cl: 0-1

GVB-SK34-01

511702A3706 13 (0.175) AM (Top,4, Ar,5000.0,195.54,1.00,LS 10); Sm (Mn, 2x1.00); Sb (1,40.00 )

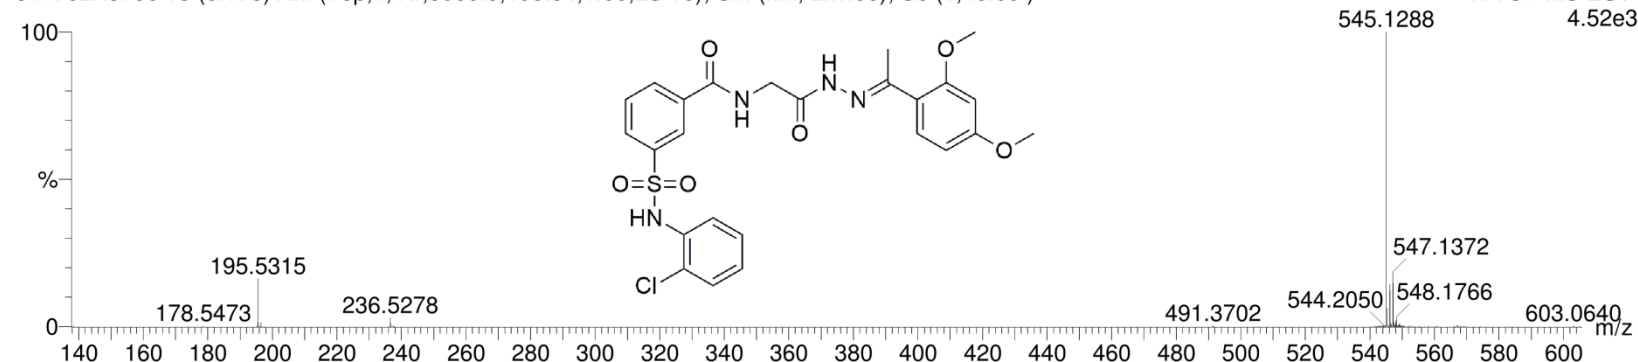

Minimum: -1.5  
Maximum: 5.0 1000.0 50.0

| Mass     | Calc. Mass | mDa | PPM | DBE  | i-FIT | Formula            |
|----------|------------|-----|-----|------|-------|--------------------|
| 545.1288 | 545.1262   | 2.6 | 4.8 | 14.5 | 427.1 | C25 H26 N4 O6 S Cl |

### HRMS of Compound-2o
